# Supplementary material
Source: Research Square preprint supplement (doi:10.21203/rs.3.rs-8991344/v1)
Supplement: Supplementary file 1 [file b14e13b7a031defe4a7e3114.xlsx]

## Sheet: Legend
Supplementary Table 1	Performance metrics for individual and ensemble models across data splits and feature selection method
Supplementary Table 2	Literature derived set of X chromosome inactivation escape genes
Supplementary table 3	Literature supported SLE genes obtained from the DisGeNet database

## Sheet: Supplementary Table 1
split	celltype	Accuracy	Precision	Recall	F1	F1_lower	F1_upper	AUC	AUC_lower	AUC_upper	AUPRC	AUPRC_lower	AUPRC_upper	Kappa	MCC	MCC_lower	MCC_upper	n_features	gene.set	method
split_1	B_cell_Atypical	0.704545	0.72	0.75	0.727273	0.588114	0.817091	0.725	0.583333	0.816667	0.698864	0.592075	0.785354	0.401674	0.45	0.16879	0.638311	7	chrX	boruta
split_1	B_cell_Atypical	0.75	0.933333	0.583333	0.701326	0.62488	0.840498	0.716667	0.666667	0.854167	0.707665	0.673267	0.867424	0.514056	0.443135	0.374633	0.724356	14	SLE	boruta
split_1	B_cell_Memory	0.717391	0.76	0.730769	0.718598	0.608696	0.824799	0.721154	0.601923	0.817596	0.715719	0.624637	0.802933	0.428298	0.438529	0.203846	0.646154	7	chrX	boruta
split_1	B_cell_Memory	0.869565	0.884615	0.884615	0.912365	0.782609	0.935061	0.905769	0.778846	0.942308	0.880256	0.760915	0.93311	0.734615	0.824319	0.557692	0.877058	23	SLE	boruta
split_1	B_cell_Naive	0.76087	0.741935	0.884615	0.870062	0.645036	0.864803	0.873077	0.634615	0.85	0.862598	0.643204	0.818779	0.49901	0.74048	0.28503	0.734465	3	chrX	boruta
split_1	B_cell_Naive	0.869565	1	0.769231	0.913373	0.778468	0.936142	0.923077	0.807692	0.943269	0.93311	0.832776	0.950669	0.743494	0.839719	0.640513	0.879008	23	SLE	boruta
split_1	B_cell	0.777778	0.777778	0.84	0.797552	0.66733	0.866667	0.79	0.665	0.865	0.758095	0.654017	0.838518	0.545455	0.594442	0.349399	0.730297	5	chrX	boruta
split_1	B_cell	0.711111	0.772727	0.68	0.911376	0.598814	0.822222	0.915	0.6	0.825	0.908406	0.613527	0.806763	0.423645	0.825064	0.198811	0.646135	10	SLE	boruta
split_1	CD4_positive,_alpha_beta_T_cell	0.891304	0.92	0.884615	0.891561	0.804816	0.956687	0.903846	0.803846	0.961538	0.916388	0.791866	0.962963	0.780115	0.803837	0.612989	0.916057	2	chrX	boruta
split_1	CD4_positive,_alpha_beta_T_cell	0.869565	0.954545	0.807692	0.891769	0.783432	0.936117	0.898077	0.801923	0.942692	0.896321	0.802753	0.949833	0.740602	0.789352	0.613356	0.878782	24	SLE	boruta
split_1	CD4_T_cell_Effector_Memory	0.652174	0.647059	0.846154	0.496752	0.510887	0.733954	0.503846	0.509615	0.723077	0.567116	0.569995	0.707469	0.258065	0.0096125	0.0223495	0.495355	2	chrX	boruta
split_1	CD4_T_cell_Effector_Memory	0.847826	0.88	0.846154	0.890936	0.761441	0.93395	0.886538	0.759615	0.925288	0.863991	0.745819	0.916388	0.692161	0.778333	0.516752	0.867396	16	SLE	boruta
split_1	CD4_T_cell_Naive	0.652174	0.777778	0.538462	0.530711	0.521739	0.761435	0.603846	0.549904	0.776923	0.637458	0.592131	0.782609	0.323529	0.249615	0.0995227	0.564902	4	chrX	boruta
split_1	CD4_T_cell_Naive	0.826087	0.909091	0.769231	0.870059	0.737154	0.913375	0.878846	0.744038	0.917596	0.879675	0.736901	0.916388	0.654135	0.75193	0.488564	0.828841	15	SLE	boruta
split_1	CD4_T_cell_Treg	0.608696	0.653846	0.653846	0.605645	0.498307	0.718067	0.596154	0.488462	0.715385	0.618968	0.559643	0.707474	0.203846	0.195336	-0.0232338	0.428713	4	chrX	boruta
split_1	CD4_T_cell_Treg	0.869565	0.916667	0.846154	0.805184	0.783432	0.956183	0.809615	0.790385	0.95	0.799331	0.783293	0.949833	0.737643	0.613941	0.576353	0.911538	19	SLE	boruta
split_1	CD8_positive,_alpha_beta_T_cell	0.782609	0.785714	0.846154	0.826087	0.672809	0.870062	0.823077	0.665385	0.873077	0.802933	0.663634	0.850652	0.552529	0.646154	0.333018	0.74116	7	chrX	boruta
split_1	CD8_positive,_alpha_beta_T_cell	0.826087	0.95	0.730769	0.847322	0.734161	0.913373	0.865385	0.757692	0.923077	0.882943	0.765812	0.93311	0.657993	0.735738	0.526098	0.839719	20	SLE	boruta
split_1	CD8_T_cell_Cytotoxic_GZMH_	0.717391	0.685714	0.923077	0.729606	0.578422	0.795203	0.717308	0.586538	0.780769	0.701035	0.611526	0.750177	0.393509	0.468239	0.227965	0.639196	3	chrX	boruta
split_1	CD8_T_cell_Cytotoxic_GZMH_	0.826087	0.846154	0.846154	0.782609	0.73913	0.913043	0.778846	0.734615	0.911538	0.761063	0.715719	0.896321	0.646154	0.557692	0.469231	0.824319	21	SLE	boruta
split_1	CD8_T_cell_Cytotoxic_GZMK_	0.717391	0.782609	0.692308	0.718059	0.605731	0.826746	0.726923	0.607692	0.828846	0.724956	0.627648	0.815426	0.434783	0.45168	0.213747	0.652691	1	chrX	boruta
split_1	CD8_T_cell_Cytotoxic_GZMK_	0.826087	0.875	0.807692	0.80481	0.737096	0.913375	0.815385	0.734519	0.917308	0.813346	0.724956	0.912974	0.65019	0.627758	0.469197	0.828268	16	SLE	boruta
split_1	CD8_T_cell_MAIT	0.733333	0.685714	0.96	0.701997	0.587607	0.812261	0.7	0.605	0.8	0.675676	0.612991	0.757576	0.431579	0.519875	0.285931	0.6742	5	chrX	boruta
split_1	CD8_T_cell_MAIT	0.8	1	0.64	0.820106	0.69579	0.888889	0.84	0.74	0.9	0.857778	0.768889	0.911111	0.61244	0.696932	0.53936	0.8	14	SLE	boruta
split_1	CD8_T_cell_Naive	0.608696	0.7	0.538462	0.566864	0.480237	0.734161	0.569231	0.5	0.734904	0.603527	0.565217	0.730766	0.230483	0.137409	0	0.469625	1	chrX	boruta
split_1	CD8_T_cell_Naive	0.804348	0.774194	0.923077	0.822636	0.689614	0.890936	0.811538	0.680769	0.886538	0.78194	0.67408	0.863991	0.590099	0.648519	0.418707	0.782664	11	SLE	boruta
split_1	Classical_monocyte	0.76087	0.8	0.769231	0.73913	0.652174	0.848476	0.734615	0.646154	0.859615	0.722151	0.65571	0.846154	0.516252	0.469231	0.292308	0.715798	4	chrX	boruta
split_1	Classical_monocyte	0.826087	0.875	0.807692	0.782609	0.73913	0.913043	0.778846	0.740385	0.911538	0.761063	0.7307	0.912974	0.65019	0.557692	0.477113	0.824319	19	SLE	boruta
split_1	Conventional_DC	0.630435	0.628571	0.846154	0.557469	0.480598	0.7096	0.553846	0.490385	0.7	0.593311	0.560545	0.687453	0.206897	0.125157	-0.0217866	0.468709	1	chrX	boruta
split_1	Conventional_DC	0.782609	0.9	0.692308	0.870062	0.678854	0.891561	0.873077	0.701827	0.898077	0.862598	0.704308	0.899666	0.572491	0.74048	0.400775	0.789352	13	SLE	boruta
split_1	Lymphocyte	0.695652	0.875	0.538462	0.645549	0.57764	0.801841	0.675	0.622885	0.815385	0.688859	0.643718	0.829783	0.414545	0.364292	0.258303	0.640513	6	chrX	boruta
split_1	Lymphocyte	0.804348	1	0.653846	0.75458	0.704949	0.891561	0.788462	0.75	0.903846	0.816054	0.782609	0.916388	0.621572	0.610089	0.550482	0.803837	20	SLE	boruta
split_1	natural_killer_cell	0.673913	0.648649	0.923077	0.697216	0.512811	0.749693	0.686538	0.536538	0.736538	0.676445	0.583816	0.714807	0.291581	0.43358	0.116387	0.536388	8	chrX	boruta
split_1	natural_killer_cell	0.804348	0.84	0.807692	0.84819	0.696805	0.891769	0.848077	0.698077	0.898077	0.831572	0.693144	0.895549	0.604207	0.692831	0.400775	0.789352	32	SLE	boruta
split_1	NK_cell_Bright	0.76087	0.857143	0.692308	0.826746	0.653499	0.869565	0.834615	0.671154	0.867308	0.829735	0.67893	0.863036	0.527103	0.664141	0.343792	0.735738	8	chrX	boruta
split_1	NK_cell_Bright	0.847826	0.88	0.846154	0.870062	0.761367	0.934562	0.873077	0.759615	0.930769	0.862598	0.745819	0.928571	0.692161	0.74048	0.516752	0.868909	18	SLE	boruta
split_1	NK_cell_Dim	0.673913	1	0.423077	0.565835	0.534557	0.75458	0.653846	0.634615	0.788462	0.698997	0.682274	0.816054	0.389381	0.402422	0.371574	0.610089	2	chrX	boruta
split_1	NK_cell_Dim	0.804348	0.84	0.807692	0.911318	0.696812	0.891564	0.9	0.701923	0.898077	0.866667	0.694545	0.882943	0.604207	0.832666	0.415385	0.789352	20	SLE	boruta
split_1	Non_classical_monocyte	0.76087	0.941176	0.615385	0.704949	0.652281	0.847322	0.75	0.7	0.865385	0.782609	0.715942	0.882943	0.537477	0.550482	0.422995	0.735738	4	chrX	boruta
split_1	Non_classical_monocyte	0.913043	0.923077	0.923077	0.888308	0.840015	0.978187	0.875	0.830769	0.975	0.83871	0.807404	0.966555	0.823077	0.793116	0.688845	0.95646	18	SLE	boruta
split_1	Plasmablast	0.567568	0.5625	0.9	0.39052	0.39052	0.624646	0.454412	0.454412	0.647059	0.51896	0.51896	0.625	0.0807453	-0.146331	-0.153659	0.385468	2	chrX	boruta
split_1	Plasmablast	0.675676	0.722222	0.65	0.702703	0.541214	0.809425	0.707353	0.552941	0.807353	0.686248	0.570478	0.774662	0.35277	0.414706	0.110531	0.618521	7	SLE	boruta
split_1	Plasmacytoid_DC	0.608696	0.653846	0.653846	0.652174	0.493009	0.71806	0.646154	0.482692	0.715385	0.653203	0.556914	0.707469	0.203846	0.292308	-0.0355506	0.428713	6	chrX	boruta
split_1	Plasmacytoid_DC	0.782609	1	0.615385	0.7301	0.679041	0.869565	0.769231	0.730769	0.884615	0.799331	0.765886	0.899666	0.581818	0.580119	0.52105	0.769231	21	SLE	boruta
split_1	Progenitor_cell	0.568182	0.6875	0.44	0.51604	0.433876	0.679183	0.542105	0.469474	0.701053	0.590909	0.554225	0.711176	0.167331	0.086711	-0.0621076	0.409054	3	chrX	boruta
split_1	Progenitor_cell	0.704545	0.8	0.64	0.705925	0.590909	0.818182	0.708421	0.602105	0.821368	0.707273	0.628517	0.82404	0.416327	0.412948	0.204211	0.649292	11	SLE	boruta
split_1	B_cell_Atypical	0.75	0.69697	0.958333	0.733447	0.613347	0.83705	0.729167	0.629167	0.829167	0.690657	0.618448	0.782785	0.47619	0.527046	0.32918	0.709384	7	chrX	boruta
split_1	B_cell_Atypical	0.818182	0.766667	0.958333	0.71836	0.712296	0.907537	0.7125	0.708125	0.9	0.680682	0.67543	0.857143	0.623932	0.454344	0.465847	0.818631	14	SLE	boruta
split_1	B_cell_Memory	0.695652	0.7	0.807692	0.689614	0.574666	0.798954	0.678846	0.565385	0.786538	0.67408	0.600065	0.766809	0.366142	0.372298	0.138287	0.600411	7	chrX	boruta
split_1	B_cell_Memory	0.891304	0.888889	0.923077	0.956522	0.815942	0.956522	0.955769	0.805769	0.955769	0.946295	0.78194	0.946295	0.777563	0.911538	0.64461	0.914174	23	SLE	boruta
split_1	B_cell_Naive	0.652174	0.708333	0.653846	0.588721	0.541932	0.762711	0.588462	0.538462	0.773077	0.615385	0.585284	0.755966	0.30038	0.175412	0.0765559	0.554755	3	chrX	boruta
split_1	B_cell_Naive	0.869565	1	0.769231	0.824769	0.801841	0.935061	0.846154	0.826923	0.942308	0.866221	0.849498	0.949833	0.743494	0.703211	0.671512	0.877058	23	SLE	boruta
split_1	B_cell	0.6	0.818182	0.36	0.640693	0.449473	0.69579	0.7	0.545	0.73	0.733333	0.582222	0.749524	0.242991	0.478091	0.111404	0.504473	5	chrX	boruta
split_1	B_cell	0.755556	1	0.56	0.668724	0.640693	0.843367	0.72	0.7	0.86	0.751111	0.733333	0.875556	0.530806	0.508747	0.478091	0.730297	10	SLE	boruta
split_1	CD4_positive,_alpha_beta_T_cell	0.782609	0.9	0.692308	0.870059	0.684595	0.870062	0.878846	0.701923	0.884615	0.879675	0.709699	0.883612	0.572491	0.75193	0.415385	0.769231	2	chrX	boruta
split_1	CD4_positive,_alpha_beta_T_cell	0.847826	0.952381	0.769231	0.847322	0.757805	0.914402	0.865385	0.776923	0.923173	0.882943	0.780672	0.93311	0.699065	0.735738	0.557612	0.841103	24	SLE	boruta
split_1	CD4_T_cell_Effector_Memory	0.76087	0.741935	0.884615	0.697216	0.631884	0.847311	0.686538	0.626731	0.842308	0.676445	0.637928	0.8125	0.49901	0.43358	0.277893	0.715626	2	chrX	boruta
split_1	CD4_T_cell_Effector_Memory	0.847826	1	0.730769	0.824769	0.75458	0.935061	0.846154	0.788462	0.942308	0.866221	0.816054	0.949833	0.702403	0.703211	0.610089	0.877058	16	SLE	boruta
split_1	CD4_T_cell_Naive	0.673913	0.789474	0.576923	0.693347	0.545385	0.783432	0.713462	0.569231	0.801923	0.7199	0.604236	0.799331	0.362292	0.433647	0.142354	0.60522	4	chrX	boruta
split_1	CD4_T_cell_Naive	0.826087	0.846154	0.846154	0.84819	0.737151	0.913043	0.848077	0.730673	0.911538	0.831572	0.715673	0.896321	0.646154	0.692831	0.469231	0.824319	15	SLE	boruta
split_1	CD4_T_cell_Treg	0.630435	0.846154	0.423077	0.652281	0.485563	0.7301	0.711538	0.561442	0.757692	0.749164	0.601505	0.779996	0.300537	0.491689	0.143298	0.548439	4	chrX	boruta
split_1	CD4_T_cell_Treg	0.913043	0.958333	0.884615	0.934939	0.848186	0.978313	0.936538	0.848077	0.980769	0.929632	0.846154	0.983278	0.825095	0.868909	0.701206	0.956949	19	SLE	boruta
split_1	CD8_positive,_alpha_beta_T_cell	0.695652	0.657895	0.961538	0.736394	0.539382	0.769928	0.725	0.56125	0.755769	0.702703	0.597162	0.728753	0.334711	0.562331	0.181164	0.577497	7	chrX	boruta
split_1	CD8_positive,_alpha_beta_T_cell	0.847826	0.913043	0.807692	0.826749	0.761435	0.934562	0.828846	0.771154	0.930769	0.815426	0.761063	0.93311	0.695652	0.652691	0.539719	0.867396	20	SLE	boruta
split_1	CD8_T_cell_Cytotoxic_GZMH_	0.608696	0.611111	0.846154	0.415373	0.464092	0.68454	0.434615	0.473077	0.673173	0.535293	0.552341	0.668687	0.155102	-0.171029	-0.0635171	0.42215	3	chrX	boruta
split_1	CD8_T_cell_Cytotoxic_GZMH_	0.847826	0.851852	0.884615	0.870062	0.757697	0.934562	0.873077	0.748077	0.930769	0.862598	0.735786	0.912974	0.688588	0.74048	0.511144	0.867396	21	SLE	boruta
split_1	CD8_T_cell_Cytotoxic_GZMK_	0.73913	0.75	0.807692	0.845807	0.625531	0.84374	0.836538	0.617308	0.834712	0.807404	0.630954	0.81345	0.463035	0.691262	0.243955	0.68927	1	chrX	boruta
split_1	CD8_T_cell_Cytotoxic_GZMK_	0.913043	0.923077	0.923077	0.913375	0.845807	0.978187	0.917308	0.836538	0.975	0.912974	0.815426	0.966555	0.823077	0.828268	0.68927	0.95646	16	SLE	boruta
split_1	CD8_T_cell_MAIT	0.711111	0.6875	0.88	0.552479	0.577586	0.80004	0.58	0.58	0.79525	0.598222	0.59914	0.765448	0.393782	0.252982	0.171736	0.636088	5	chrX	boruta
split_1	CD8_T_cell_MAIT	0.866667	0.913043	0.84	0.844906	0.777778	0.955241	0.85	0.78	0.95	0.838384	0.761159	0.946667	0.732673	0.695837	0.55667	0.91	14	SLE	boruta
split_1	CD8_T_cell_Naive	0.586957	0.64	0.615385	0.541932	0.458843	0.696805	0.532692	0.463462	0.696154	0.582064	0.548196	0.693144	0.164436	0.0658292	-0.0742278	0.389324	1	chrX	boruta
split_1	CD8_T_cell_Naive	0.782609	0.833333	0.769231	0.913043	0.68454	0.889916	0.911538	0.684519	0.884712	0.895549	0.685976	0.879064	0.562738	0.823077	0.37494	0.778333	11	SLE	boruta
split_1	Classical_monocyte	0.76087	0.8	0.769231	0.804816	0.653426	0.848476	0.803846	0.651923	0.853846	0.787157	0.658793	0.846154	0.516252	0.604792	0.301536	0.703211	4	chrX	boruta
split_1	Classical_monocyte	0.891304	0.83871	1	0.911318	0.815942	0.956183	0.9	0.8	0.95	0.866667	0.764706	0.928571	0.772277	0.832666	0.677365	0.914174	19	SLE	boruta
split_1	Conventional_DC	0.608696	0.611111	0.846154	0.640537	0.464092	0.688465	0.636538	0.467212	0.680769	0.642231	0.549611	0.671427	0.155102	0.341244	-0.0804582	0.423448	1	chrX	boruta
split_1	Conventional_DC	0.891304	0.888889	0.923077	0.889862	0.804816	0.956522	0.880769	0.803846	0.955769	0.850652	0.781664	0.946295	0.777563	0.782114	0.613545	0.914174	13	SLE	boruta
split_1	Lymphocyte	0.652174	0.619048	1	0.498927	0.45537	0.677617	0.55	0.525	0.675	0.590909	0.577778	0.666667	0.220339	0.243086	0.169967	0.483046	6	chrX	boruta
split_1	Lymphocyte	0.804348	1	0.653846	0.824769	0.704949	0.891561	0.846154	0.75	0.903846	0.866221	0.782609	0.916388	0.621572	0.703211	0.550482	0.803837	20	SLE	boruta
split_1	natural_killer_cell	0.652174	0.638889	0.884615	0.677617	0.510806	0.736394	0.675	0.517308	0.725	0.666667	0.573871	0.702703	0.24898	0.483046	0.0509525	0.520841	8	chrX	boruta
split_1	natural_killer_cell	0.826087	0.8	0.923077	0.934562	0.729606	0.911318	0.930769	0.717308	0.9	0.912053	0.701035	0.866667	0.637795	0.867396	0.464372	0.824319	32	SLE	boruta
split_1	NK_cell_Bright	0.695652	0.657895	0.961538	0.677617	0.544846	0.763908	0.675	0.561538	0.75	0.666667	0.597324	0.722222	0.334711	0.483046	0.196233	0.600925	8	chrX	boruta
split_1	NK_cell_Bright	0.782609	1	0.615385	0.565835	0.679041	0.869565	0.653846	0.730769	0.884615	0.698997	0.765886	0.899666	0.581818	0.402422	0.52105	0.769231	18	SLE	boruta
split_1	NK_cell_Dim	0.717391	0.882353	0.576923	0.704949	0.605731	0.804811	0.75	0.642115	0.826923	0.782609	0.658505	0.832776	0.453382	0.550482	0.294203	0.66451	2	chrX	boruta
split_1	NK_cell_Dim	0.782609	1	0.615385	0.847322	0.679041	0.869565	0.865385	0.730769	0.884615	0.882943	0.765886	0.899666	0.581818	0.735738	0.52105	0.769231	20	SLE	boruta
split_1	Non_classical_monocyte	0.782609	0.833333	0.769231	0.826749	0.674693	0.870062	0.828846	0.67875	0.878846	0.815426	0.679673	0.863991	0.562738	0.652691	0.363	0.75193	4	chrX	boruta
split_1	Non_classical_monocyte	0.913043	0.958333	0.884615	0.934939	0.848186	0.978194	0.936538	0.848077	0.975288	0.929632	0.846154	0.967391	0.825095	0.868909	0.692831	0.956484	18	SLE	boruta
split_1	Plasmablast	0.540541	0.545455	0.9	0.437151	0.353808	0.562087	0.529412	0.429412	0.592647	0.555556	0.508108	0.59109	0.0187207	0.180775	-0.220389	0.32219	2	chrX	boruta
split_1	Plasmablast	0.783784	0.833333	0.75	0.891576	0.673263	0.89205	0.9	0.673529	0.895588	0.908108	0.654886	0.883859	0.568513	0.804748	0.354451	0.78886	7	SLE	boruta
split_1	Plasmacytoid_DC	0.673913	0.648649	0.923077	0.628019	0.528824	0.743798	0.630769	0.542308	0.730769	0.63811	0.586914	0.708552	0.291581	0.360957	0.11678	0.536388	6	chrX	boruta
split_1	Plasmacytoid_DC	0.847826	0.88	0.846154	0.826749	0.76006	0.934939	0.828846	0.757692	0.936538	0.815426	0.7457	0.929632	0.692161	0.652691	0.516752	0.868909	21	SLE	boruta
split_1	Progenitor_cell	0.545455	0.647059	0.44	0.575407	0.421911	0.657858	0.621053	0.443158	0.674737	0.648601	0.545364	0.685556	0.118236	0.262844	-0.114531	0.352078	3	chrX	boruta
split_1	Progenitor_cell	0.636364	0.655172	0.76	0.581996	0.502165	0.737125	0.570526	0.497895	0.723158	0.605987	0.567152	0.713515	0.239741	0.147395	-0.00447774	0.485582	11	SLE	boruta
split_1	B_cell_Atypical	0.681818	0.647059	0.916667	0.626215	0.530418	0.768842	0.633333	0.558333	0.7625	0.621645	0.576156	0.724432	0.330435	0.32918	0.158424	0.594089	7	chrX	boruta
split_1	B_cell_Atypical	0.636364	0.722222	0.541667	0.590909	0.511489	0.750389	0.595833	0.533333	0.7625	0.602083	0.56328	0.752976	0.284553	0.191667	0.0681747	0.536875	14	SLE	boruta
split_1	B_cell_Memory	0.652174	0.727273	0.615385	0.474308	0.537124	0.761435	0.492308	0.538462	0.7675	0.561501	0.585284	0.761063	0.308271	-0.0156269	0.0765559	0.539719	7	chrX	boruta
split_1	B_cell_Memory	0.630435	0.615385	0.923077	0.479227	0.471084	0.677631	0.498077	0.498077	0.675	0.564274	0.564274	0.666667	0.18711	-0.0053082	-0.0053082	0.451787	23	SLE	boruta
split_1	B_cell_Naive	0.543478	1	0.192308	0.501812	0.352484	0.565835	0.615385	0.538462	0.653846	0.665552	0.598662	0.698997	0.171527	0.339683	0.186989	0.402422	3	chrX	boruta
split_1	B_cell_Naive	0.826087	0.875	0.807692	0.761891	0.718598	0.913375	0.765385	0.726923	0.917308	0.755853	0.722151	0.912974	0.65019	0.526235	0.45168	0.828268	23	SLE	boruta
split_1	B_cell	0.555556	0.777778	0.28	0.611578	0.384745	0.62933	0.68	0.5	0.68	0.715556	0.555556	0.700317	0.166667	0.447214	0	0.4159	5	chrX	boruta
split_1	B_cell	0.644444	0.68	0.68	0.645503	0.512566	0.756281	0.645	0.515	0.76	0.645217	0.563175	0.744646	0.28	0.288276	0.0298807	0.516908	10	SLE	boruta
split_1	CD4_positive,_alpha_beta_T_cell	0.804348	0.869565	0.769231	0.782609	0.696812	0.891564	0.796154	0.709615	0.898077	0.79699	0.707559	0.896321	0.608696	0.592308	0.422081	0.789352	2	chrX	boruta
split_1	CD4_positive,_alpha_beta_T_cell	0.869565	0.954545	0.807692	0.891564	0.783437	0.935061	0.892308	0.803846	0.942308	0.879064	0.799331	0.949833	0.740602	0.78087	0.613356	0.877058	24	SLE	boruta
split_1	CD4_T_cell_Effector_Memory	0.565217	0.666667	0.461538	0.518116	0.432595	0.675306	0.536538	0.467308	0.694231	0.584634	0.550255	0.704308	0.154412	0.0742278	-0.0660046	0.398957	2	chrX	boruta
split_1	CD4_T_cell_Effector_Memory	0.826087	0.909091	0.769231	0.80481	0.737154	0.913373	0.815385	0.746154	0.917308	0.813346	0.740347	0.916388	0.654135	0.627758	0.488564	0.828268	16	SLE	boruta
split_1	CD4_T_cell_Naive	0.717391	0.809524	0.653846	0.665336	0.608696	0.826087	0.7	0.619231	0.828846	0.715942	0.637793	0.829735	0.441121	0.422995	0.238462	0.652691	4	chrX	boruta
split_1	CD4_T_cell_Naive	0.847826	0.851852	0.884615	0.848476	0.754277	0.934562	0.853846	0.742308	0.930769	0.846154	0.728861	0.912974	0.688588	0.701646	0.509559	0.867396	15	SLE	boruta
split_1	CD4_T_cell_Treg	0.652174	0.708333	0.653846	0.629212	0.541967	0.761891	0.644231	0.538462	0.77125	0.657631	0.585284	0.761063	0.30038	0.290423	0.0765559	0.540471	4	chrX	boruta
split_1	CD4_T_cell_Treg	0.826087	1	0.692308	0.891561	0.7301	0.913373	0.903846	0.769231	0.923077	0.916388	0.799331	0.93311	0.661765	0.803837	0.580119	0.839719	19	SLE	boruta
split_1	CD8_positive,_alpha_beta_T_cell	0.586957	0.581395	0.961538	0.457625	0.39804	0.577153	0.492308	0.467308	0.6	0.561465	0.54965	0.619048	0.0682303	-0.0245026	-0.130744	0.351866	7	chrX	boruta
split_1	CD8_positive,_alpha_beta_T_cell	0.913043	0.958333	0.884615	0.935061	0.847322	0.978313	0.942308	0.847981	0.980769	0.949833	0.834531	0.983278	0.825095	0.877058	0.692831	0.956949	20	SLE	boruta
split_1	CD8_T_cell_Cytotoxic_GZMH_	0.586957	0.64	0.615385	0.493366	0.458792	0.716456	0.482692	0.455769	0.715385	0.556914	0.545151	0.707559	0.164436	-0.0355506	-0.0877058	0.428713	3	chrX	boruta
split_1	CD8_T_cell_Cytotoxic_GZMH_	0.804348	0.793103	0.884615	0.847311	0.695534	0.890936	0.842308	0.686442	0.886538	0.818779	0.681673	0.863991	0.594912	0.68927	0.38829	0.782114	21	SLE	boruta
split_1	CD8_T_cell_Cytotoxic_GZMK_	0.73913	0.733333	0.846154	0.669587	0.629183	0.826087	0.659615	0.621154	0.823077	0.660939	0.634468	0.799331	0.456693	0.327856	0.252634	0.65885	1	chrX	boruta
split_1	CD8_T_cell_Cytotoxic_GZMK_	0.847826	0.952381	0.769231	0.780962	0.75458	0.934939	0.801923	0.765385	0.936538	0.813174	0.771253	0.93311	0.699065	0.613356	0.548003	0.868909	16	SLE	boruta
split_1	CD8_T_cell_MAIT	0.711111	0.6875	0.88	0.683128	0.586134	0.797552	0.675	0.585	0.79	0.662835	0.601287	0.757602	0.393782	0.363324	0.217801	0.635934	5	chrX	boruta
split_1	CD8_T_cell_MAIT	0.777778	0.777778	0.84	0.866667	0.66733	0.86668	0.865	0.665	0.86525	0.841067	0.657921	0.841067	0.545455	0.73	0.337514	0.747018	14	SLE	boruta
split_1	CD8_T_cell_Naive	0.630435	0.609756	0.961538	0.577153	0.443701	0.658967	0.6	0.505769	0.655769	0.619048	0.568068	0.65433	0.176842	0.351866	0.0280484	0.441588	1	chrX	boruta
split_1	CD8_T_cell_Naive	0.826087	0.846154	0.846154	0.824731	0.733954	0.913043	0.817308	0.72875	0.911538	0.791866	0.714465	0.896321	0.646154	0.64461	0.464901	0.824319	11	SLE	boruta
split_1	Classical_monocyte	0.76087	0.857143	0.692308	0.595151	0.665047	0.848476	0.636538	0.676923	0.859712	0.658505	0.679673	0.863036	0.527103	0.294203	0.350823	0.716731	4	chrX	boruta
split_1	Classical_monocyte	0.847826	0.851852	0.884615	0.803685	0.754277	0.913375	0.798077	0.742308	0.917308	0.776415	0.728866	0.912053	0.688588	0.600207	0.509559	0.832666	19	SLE	boruta
split_1	Conventional_DC	0.586957	0.64	0.615385	0.501182	0.459212	0.696812	0.505769	0.463462	0.702019	0.568084	0.548196	0.700235	0.164436	0.0114834	-0.0742278	0.415551	1	chrX	boruta
split_1	Conventional_DC	0.826087	0.909091	0.769231	0.870059	0.729525	0.913373	0.878846	0.738462	0.917596	0.879675	0.736836	0.916388	0.654135	0.75193	0.487991	0.828841	13	SLE	boruta
split_1	Lymphocyte	0.630435	0.615385	0.923077	0.595419	0.464294	0.697216	0.605769	0.498077	0.686538	0.622701	0.564274	0.676445	0.18711	0.311376	-0.0053082	0.483046	6	chrX	boruta
split_1	Lymphocyte	0.804348	0.869565	0.769231	0.826087	0.695652	0.891564	0.840385	0.701635	0.898077	0.846405	0.700235	0.896321	0.608696	0.680769	0.400684	0.789352	20	SLE	boruta
split_1	natural_killer_cell	0.673913	0.657143	0.884615	0.737096	0.54468	0.754277	0.728846	0.548077	0.742308	0.714465	0.590075	0.721545	0.300203	0.464901	0.120156	0.536388	8	chrX	boruta
split_1	natural_killer_cell	0.804348	0.869565	0.769231	0.848476	0.696812	0.891769	0.853846	0.713462	0.898077	0.846154	0.709699	0.896321	0.608696	0.701646	0.428713	0.789352	32	SLE	boruta
split_1	NK_cell_Bright	0.5	1	0.115385	0.263505	0.263505	0.501812	0.5	0.5	0.615385	0.565217	0.565217	0.665552	0.101868	0	0	0.339683	8	chrX	boruta
split_1	NK_cell_Bright	0.586957	0.652174	0.576923	0.653499	0.458843	0.716434	0.651923	0.461538	0.715385	0.658793	0.547699	0.707666	0.173913	0.301536	-0.0765559	0.428713	18	SLE	boruta
split_1	NK_cell_Dim	0.76087	0.941176	0.615385	0.891769	0.645549	0.848186	0.898077	0.686538	0.865385	0.896321	0.704308	0.882943	0.537477	0.789352	0.398957	0.735738	2	chrX	boruta
split_1	NK_cell_Dim	0.782609	0.863636	0.730769	0.761891	0.689855	0.870062	0.765385	0.694231	0.878846	0.755853	0.694596	0.879675	0.567669	0.526235	0.389499	0.75193	20	SLE	boruta
split_1	Non_classical_monocyte	0.826087	0.821429	0.884615	0.733954	0.733954	0.912365	0.723077	0.723077	0.905769	0.707469	0.707554	0.880256	0.642023	0.464372	0.464901	0.824319	4	chrX	boruta
split_1	Non_classical_monocyte	0.782609	0.9	0.692308	0.693347	0.675275	0.870062	0.713462	0.7	0.884615	0.7199	0.707396	0.882943	0.572491	0.433647	0.414654	0.769231	18	SLE	boruta
split_1	Plasmablast	0.756757	0.761905	0.8	0.723997	0.643904	0.864465	0.719118	0.639706	0.861765	0.683164	0.624266	0.825483	0.508124	0.457477	0.289852	0.730208	2	chrX	boruta
split_1	Plasmablast	0.72973	0.75	0.75	0.757113	0.593396	0.838075	0.757353	0.594118	0.841176	0.72724	0.595164	0.819219	0.455882	0.513199	0.187684	0.680571	7	SLE	boruta
split_1	Plasmacytoid_DC	0.630435	0.655172	0.730769	0.608696	0.504277	0.737198	0.601923	0.496154	0.728942	0.623167	0.563336	0.714482	0.234834	0.203846	-0.00828742	0.469625	6	chrX	boruta
split_1	Plasmacytoid_DC	0.804348	0.793103	0.884615	0.689614	0.704183	0.890936	0.678846	0.692308	0.886538	0.67408	0.681768	0.863991	0.594912	0.372298	0.418707	0.782114	21	SLE	boruta
split_1	Progenitor_cell	0.636364	0.666667	0.72	0.64876	0.501979	0.746361	0.636842	0.496579	0.735789	0.64697	0.566513	0.722569	0.249467	0.291053	-0.00688669	0.487818	3	chrX	boruta
split_1	Progenitor_cell	0.613636	0.833333	0.4	0.536756	0.473554	0.721591	0.607368	0.554737	0.753684	0.642364	0.599697	0.772667	0.272374	0.253813	0.121756	0.530183	11	SLE	boruta
split_1	B_cell_Atypical	0.704545	0.866667	0.541667	0.739799	0.57799	0.795772	0.770833	0.616667	0.8125	0.791667	0.625668	0.828072	0.425703	0.591153	0.270581	0.656532	7	chrX	boruta
split_1	B_cell_Atypical	0.818182	0.807692	0.875	0.840493	0.722611	0.908517	0.8375	0.716667	0.904167	0.803182	0.686147	0.871187	0.630252	0.678543	0.448543	0.818631	14	SLE	boruta
split_1	B_cell_Memory	0.73913	0.769231	0.769231	0.761435	0.625531	0.845807	0.771154	0.619038	0.836538	0.76732	0.634369	0.815426	0.469231	0.539719	0.238389	0.68927	7	chrX	boruta
split_1	B_cell_Memory	0.869565	0.916667	0.846154	0.826749	0.783437	0.956522	0.828846	0.796154	0.955769	0.815426	0.776415	0.949833	0.737643	0.652691	0.592308	0.911538	23	SLE	boruta
split_1	B_cell_Naive	0.782609	0.807692	0.807692	0.761441	0.689614	0.889862	0.759615	0.678846	0.880769	0.745819	0.678687	0.862598	0.557692	0.516752	0.372298	0.778333	3	chrX	boruta
split_1	B_cell_Naive	0.869565	0.954545	0.807692	0.826087	0.782609	0.935061	0.840385	0.796154	0.942308	0.846405	0.79699	0.949833	0.740602	0.680769	0.592308	0.877058	23	SLE	boruta
split_1	B_cell	0.777778	0.777778	0.84	0.81893	0.671266	0.866667	0.81	0.665	0.865	0.7741	0.657921	0.841067	0.545455	0.643602	0.363324	0.7356	5	chrX	boruta
split_1	B_cell	0.777778	0.941176	0.64	0.705934	0.675664	0.866271	0.73	0.70975	0.88	0.734444	0.7155	0.890838	0.567308	0.477512	0.442583	0.764601	10	SLE	boruta
split_1	CD4_positive,_alpha_beta_T_cell	0.804348	0.904762	0.730769	0.778468	0.709958	0.891769	0.807692	0.721154	0.903846	0.832776	0.724956	0.912974	0.613084	0.640513	0.453018	0.803837	2	chrX	boruta
split_1	CD4_positive,_alpha_beta_T_cell	0.869565	0.954545	0.807692	0.913375	0.782609	0.935061	0.917308	0.801923	0.942308	0.912974	0.799331	0.949833	0.740602	0.828268	0.613356	0.877058	24	SLE	boruta
split_1	CD4_T_cell_Effector_Memory	0.695652	0.714286	0.769231	0.521739	0.575569	0.801752	0.513462	0.569038	0.792308	0.571971	0.603354	0.77146	0.373541	0.0269231	0.138287	0.600207	2	chrX	boruta
split_1	CD4_T_cell_Effector_Memory	0.869565	0.916667	0.846154	0.870059	0.783432	0.935061	0.878846	0.790385	0.942308	0.879675	0.776415	0.946295	0.737643	0.75193	0.592308	0.877058	16	SLE	boruta
split_1	CD4_T_cell_Naive	0.73913	0.769231	0.769231	0.718067	0.629183	0.847311	0.715385	0.621154	0.842308	0.707559	0.637676	0.818779	0.469231	0.428713	0.243955	0.68927	4	chrX	boruta
split_1	CD4_T_cell_Naive	0.826087	0.875	0.807692	0.80481	0.73913	0.913375	0.815385	0.740385	0.917308	0.813346	0.728866	0.912974	0.65019	0.627758	0.477113	0.828268	15	SLE	boruta
split_1	CD4_T_cell_Treg	0.608696	0.633333	0.730769	0.600932	0.480187	0.713642	0.590385	0.476923	0.703846	0.614994	0.554213	0.693576	0.185039	0.188151	-0.0488477	0.418928	4	chrX	boruta
split_1	CD4_T_cell_Treg	0.891304	0.92	0.884615	0.913375	0.80481	0.956687	0.917308	0.803846	0.961538	0.912974	0.791866	0.966555	0.780115	0.828268	0.604792	0.916057	19	SLE	boruta
split_1	CD8_positive,_alpha_beta_T_cell	0.782609	0.9	0.692308	0.737154	0.672833	0.870062	0.757692	0.694231	0.884615	0.7644	0.704308	0.896321	0.572491	0.523501	0.398957	0.769231	7	chrX	boruta
split_1	CD8_positive,_alpha_beta_T_cell	0.869565	0.916667	0.846154	0.826087	0.783432	0.936117	0.823077	0.790385	0.942692	0.802933	0.776415	0.949833	0.737643	0.646154	0.580445	0.878782	20	SLE	boruta
split_1	CD8_T_cell_Cytotoxic_GZMH_	0.695652	0.676471	0.884615	0.84819	0.557469	0.780914	0.848077	0.559615	0.773077	0.831572	0.596635	0.743423	0.350806	0.692831	0.131269	0.600411	3	chrX	boruta
split_1	CD8_T_cell_Cytotoxic_GZMH_	0.804348	1	0.653846	0.801841	0.704949	0.891561	0.826923	0.75	0.903846	0.849498	0.782609	0.916388	0.621572	0.671512	0.550482	0.803837	21	SLE	boruta
split_1	CD8_T_cell_Cytotoxic_GZMK_	0.673913	0.73913	0.653846	0.674693	0.565217	0.783437	0.671154	0.569038	0.790385	0.672375	0.603354	0.780803	0.347826	0.340674	0.137409	0.576353	1	chrX	boruta
split_1	CD8_T_cell_Cytotoxic_GZMK_	0.869565	0.833333	0.961538	0.798954	0.780783	0.934939	0.786538	0.772788	0.936538	0.758118	0.742857	0.928571	0.728346	0.606022	0.599072	0.872966	16	SLE	boruta
split_1	CD8_T_cell_MAIT	0.711111	0.7	0.84	0.797552	0.587533	0.812261	0.79	0.585	0.80025	0.758095	0.602452	0.765448	0.4	0.594442	0.176472	0.63901	5	chrX	boruta
split_1	CD8_T_cell_MAIT	0.844444	0.95	0.76	0.821695	0.753862	0.933531	0.835	0.775	0.94	0.837661	0.768889	0.946667	0.692683	0.674057	0.55667	0.874767	14	SLE	boruta
split_1	CD8_T_cell_Naive	0.673913	0.641026	0.961538	0.628019	0.50928	0.736394	0.630769	0.542308	0.725	0.63811	0.586914	0.702703	0.282744	0.360957	0.123553	0.537685	1	chrX	boruta
split_1	CD8_T_cell_Naive	0.73913	0.818182	0.692308	0.649539	0.625699	0.826749	0.669231	0.630577	0.842308	0.679673	0.643697	0.831632	0.481203	0.343792	0.262658	0.68927	11	SLE	boruta
split_1	Classical_monocyte	0.804348	0.84	0.807692	0.845807	0.696812	0.891564	0.836538	0.698077	0.892308	0.807404	0.693144	0.879675	0.604207	0.691262	0.415385	0.780932	4	chrX	boruta
split_1	Classical_monocyte	0.826087	0.846154	0.846154	0.891564	0.737096	0.913375	0.892308	0.728846	0.917308	0.879064	0.715719	0.912053	0.646154	0.78087	0.468239	0.832666	19	SLE	boruta
split_1	Conventional_DC	0.652174	0.619048	1	0.612589	0.45537	0.677617	0.625	0.525	0.675	0.634146	0.577778	0.666667	0.220339	0.398167	0.169967	0.483046	1	chrX	boruta
split_1	Conventional_DC	0.847826	0.952381	0.769231	0.891769	0.760078	0.934939	0.898077	0.782692	0.936538	0.896321	0.783293	0.93311	0.699065	0.789352	0.576353	0.868909	13	SLE	boruta
split_1	Lymphocyte	0.76087	0.714286	0.961538	0.707686	0.640537	0.840714	0.7	0.636538	0.825	0.684211	0.642231	0.787879	0.486815	0.523148	0.341244	0.715626	6	chrX	boruta
split_1	Lymphocyte	0.826087	1	0.692308	0.75458	0.7301	0.891561	0.788462	0.769231	0.903846	0.816054	0.799331	0.916388	0.661765	0.610089	0.580119	0.803837	20	SLE	boruta
split_1	natural_killer_cell	0.673913	0.677419	0.807692	0.669587	0.549343	0.780914	0.659615	0.540385	0.773077	0.660939	0.586068	0.751792	0.316832	0.327856	0.0870179	0.557692	8	chrX	boruta
split_1	natural_killer_cell	0.847826	0.952381	0.769231	0.891769	0.760078	0.934939	0.898077	0.782692	0.936538	0.896321	0.783293	0.93311	0.699065	0.789352	0.576353	0.868909	32	SLE	boruta
split_1	NK_cell_Bright	0.782609	0.807692	0.807692	0.891564	0.67459	0.870062	0.892308	0.670865	0.873077	0.879064	0.671666	0.850652	0.557692	0.78087	0.340291	0.74048	8	chrX	boruta
split_1	NK_cell_Bright	0.826087	1	0.692308	0.869565	0.7301	0.913373	0.884615	0.769231	0.923077	0.899666	0.799331	0.93311	0.661765	0.769231	0.580119	0.839719	18	SLE	boruta
split_1	NK_cell_Dim	0.673913	0.866667	0.5	0.640134	0.54824	0.780962	0.680769	0.603846	0.801923	0.699952	0.63014	0.813346	0.37613	0.389509	0.221446	0.613356	2	chrX	boruta
split_1	NK_cell_Dim	0.847826	0.851852	0.884615	0.891564	0.749215	0.933917	0.892308	0.740385	0.925	0.879064	0.728531	0.912974	0.688588	0.78087	0.508509	0.867396	20	SLE	boruta
split_1	Non_classical_monocyte	0.76087	0.941176	0.615385	0.826087	0.659557	0.848186	0.840385	0.694231	0.865385	0.846405	0.713907	0.879675	0.537477	0.680769	0.421182	0.735738	4	chrX	boruta
split_1	Non_classical_monocyte	0.913043	0.923077	0.923077	0.866977	0.845807	0.978313	0.855769	0.836538	0.980769	0.823021	0.815426	0.983278	0.823077	0.740593	0.68927	0.956949	18	SLE	boruta
split_1	Plasmablast	0.540541	0.542857	0.95	0.421829	0.353808	0.518831	0.504412	0.45	0.563235	0.542741	0.516911	0.573997	0.00944882	0.0194461	-0.220389	0.259281	2	chrX	boruta
split_1	Plasmablast	0.702703	0.909091	0.5	0.69655	0.567257	0.806896	0.716176	0.620588	0.825	0.708628	0.634797	0.839189	0.424328	0.451337	0.291194	0.67854	7	SLE	boruta
split_1	Plasmacytoid_DC	0.673913	0.657143	0.884615	0.567651	0.528824	0.749693	0.559615	0.536442	0.736538	0.596635	0.583771	0.714807	0.300203	0.131269	0.0865749	0.536388	6	chrX	boruta
split_1	Plasmacytoid_DC	0.804348	0.947368	0.692308	0.780962	0.709958	0.891769	0.801923	0.738462	0.903846	0.813174	0.74818	0.916388	0.617375	0.613356	0.489809	0.803837	21	SLE	boruta
split_1	Progenitor_cell	0.590909	0.684211	0.52	0.54169	0.469949	0.705318	0.562105	0.483105	0.715053	0.602888	0.560166	0.723394	0.196755	0.126357	-0.0337757	0.445399	3	chrX	boruta
split_1	Progenitor_cell	0.681818	0.923077	0.48	0.742805	0.541599	0.792589	0.78	0.614737	0.813684	0.81	0.648601	0.827273	0.39726	0.595539	0.262844	0.632043	11	SLE	boruta
split_1	B_cell_Atypical	0.613636	0.888889	0.333333	0.597403	0.458252	0.692489	0.666667	0.554167	0.729167	0.69697	0.580628	0.753788	0.266667	0.430331	0.14748	0.527046	7	chrX	boruta
split_1	B_cell_Atypical	0.795455	0.826087	0.791667	0.818558	0.703772	0.886541	0.820833	0.704167	0.8875	0.797348	0.682642	0.867095	0.589212	0.63901	0.407063	0.772734	14	SLE	boruta
split_1	B_cell_Memory	0.652174	0.666667	0.769231	0.652174	0.522141	0.757815	0.646154	0.515385	0.748365	0.653203	0.57292	0.728866	0.275591	0.292308	0.0338758	0.512475	7	chrX	boruta
split_1	B_cell_Memory	0.804348	0.814815	0.846154	0.778295	0.704183	0.891564	0.767308	0.698077	0.892308	0.743423	0.693144	0.879064	0.599613	0.556445	0.418707	0.782114	23	SLE	boruta
split_1	B_cell_Naive	0.673913	0.72	0.692308	0.761435	0.545428	0.78265	0.771154	0.55	0.784615	0.76732	0.592133	0.77146	0.340344	0.539719	0.0995227	0.564902	3	chrX	boruta
split_1	B_cell_Naive	0.891304	0.956522	0.846154	0.956687	0.824769	0.956687	0.961538	0.828846	0.961538	0.966555	0.829735	0.966555	0.782609	0.916057	0.664141	0.916057	23	SLE	boruta
split_1	B_cell	0.6	0.888889	0.32	0.482722	0.444696	0.675664	0.57	0.55	0.72	0.602222	0.587302	0.751111	0.25	0.181956	0.13484	0.508747	5	chrX	boruta
split_1	B_cell	0.733333	0.809524	0.68	0.73386	0.622222	0.843975	0.74	0.625	0.84	0.728254	0.631313	0.823889	0.470588	0.478091	0.248513	0.686683	10	SLE	boruta
split_1	CD4_positive,_alpha_beta_T_cell	0.782609	0.9	0.692308	0.783432	0.685117	0.870062	0.790385	0.701923	0.884615	0.783293	0.709699	0.895588	0.572491	0.576353	0.415385	0.769231	2	chrX	boruta
split_1	CD4_positive,_alpha_beta_T_cell	0.869565	0.916667	0.846154	0.847322	0.783437	0.956522	0.865385	0.796154	0.955769	0.882943	0.783293	0.949833	0.737643	0.735738	0.592308	0.911538	24	SLE	boruta
split_1	CD4_T_cell_Effector_Memory	0.76087	0.857143	0.692308	0.826746	0.652174	0.848476	0.834615	0.671154	0.859615	0.829735	0.67893	0.863036	0.527103	0.664141	0.343792	0.715798	2	chrX	boruta
split_1	CD4_T_cell_Effector_Memory	0.869565	0.884615	0.884615	0.934939	0.783437	0.935061	0.936538	0.784615	0.942308	0.929632	0.766809	0.93311	0.734615	0.868909	0.564902	0.877058	16	SLE	boruta
split_1	CD4_T_cell_Naive	0.695652	0.833333	0.576923	0.737154	0.581664	0.801933	0.757692	0.605769	0.815385	0.7644	0.63237	0.816054	0.408088	0.523501	0.22501	0.640513	4	chrX	boruta
split_1	CD4_T_cell_Naive	0.782609	0.9	0.692308	0.848476	0.674591	0.870059	0.853846	0.7	0.878846	0.846154	0.709699	0.882943	0.572491	0.701646	0.415385	0.75193	15	SLE	boruta
split_1	CD4_T_cell_Treg	0.695652	0.657895	0.961538	0.736394	0.539382	0.763908	0.725	0.561538	0.75	0.702703	0.597324	0.722222	0.334711	0.562331	0.181164	0.578669	4	chrX	boruta
split_1	CD4_T_cell_Treg	0.891304	0.92	0.884615	0.934939	0.804816	0.956687	0.936538	0.803846	0.961538	0.929632	0.787157	0.966555	0.780115	0.868909	0.604792	0.916057	19	SLE	boruta
split_1	CD8_positive,_alpha_beta_T_cell	0.891304	0.862069	0.961538	0.911318	0.815942	0.956522	0.9	0.8	0.955769	0.866667	0.772941	0.946295	0.774951	0.832666	0.64461	0.914174	7	chrX	boruta
split_1	CD8_positive,_alpha_beta_T_cell	0.826087	0.95	0.730769	0.805184	0.734161	0.913373	0.809615	0.757692	0.923077	0.799331	0.7644	0.929632	0.657993	0.613941	0.523501	0.839719	20	SLE	boruta
split_1	CD8_T_cell_Cytotoxic_GZMH_	0.695652	0.730769	0.730769	0.629183	0.575569	0.801849	0.621154	0.571058	0.79625	0.635452	0.603617	0.776415	0.380769	0.243955	0.145759	0.600411	3	chrX	boruta
split_1	CD8_T_cell_Cytotoxic_GZMH_	0.891304	0.92	0.884615	0.891769	0.821764	0.956687	0.898077	0.817212	0.961538	0.896321	0.797173	0.962963	0.780115	0.789352	0.64461	0.916057	21	SLE	boruta
split_1	CD8_T_cell_Cytotoxic_GZMK_	0.73913	0.75	0.807692	0.733954	0.613162	0.84374	0.723077	0.609615	0.834712	0.707469	0.626713	0.807404	0.463035	0.464372	0.231834	0.68937	1	chrX	boruta
split_1	CD8_T_cell_Cytotoxic_GZMK_	0.913043	0.958333	0.884615	0.956687	0.848186	0.978313	0.961538	0.853846	0.980769	0.966555	0.846154	0.983278	0.825095	0.916057	0.701646	0.956949	16	SLE	boruta
split_1	CD8_T_cell_MAIT	0.711111	0.6875	0.88	0.749206	0.584637	0.812261	0.74	0.585	0.8	0.712	0.602394	0.758463	0.393782	0.505964	0.176472	0.639059	5	chrX	boruta
split_1	CD8_T_cell_MAIT	0.888889	0.884615	0.92	0.822222	0.799397	0.955556	0.82	0.795	0.955	0.794489	0.765448	0.946667	0.773869	0.64	0.597614	0.912871	14	SLE	boruta
split_1	CD8_T_cell_Naive	0.565217	0.666667	0.461538	0.601242	0.430501	0.672834	0.630769	0.461538	0.688462	0.650502	0.547699	0.699952	0.154412	0.272218	-0.0781575	0.389509	1	chrX	boruta
split_1	CD8_T_cell_Naive	0.804348	0.757576	0.961538	0.819737	0.703834	0.889862	0.805769	0.692019	0.880769	0.772941	0.681501	0.850652	0.58517	0.65885	0.43358	0.793116	11	SLE	boruta
split_1	Classical_monocyte	0.782609	0.833333	0.769231	0.847311	0.677769	0.890967	0.842308	0.688462	0.886827	0.818779	0.686253	0.879675	0.562738	0.68927	0.379486	0.78087	4	chrX	boruta
split_1	Classical_monocyte	0.869565	0.833333	0.961538	0.911318	0.774671	0.934939	0.9	0.761538	0.936538	0.866667	0.735786	0.928571	0.728346	0.832666	0.563545	0.872966	19	SLE	boruta
split_1	Conventional_DC	0.608696	0.611111	0.846154	0.58587	0.464092	0.68454	0.578846	0.476731	0.673077	0.607564	0.554119	0.668687	0.155102	0.178025	-0.0557422	0.407452	1	chrX	boruta
split_1	Conventional_DC	0.847826	0.913043	0.807692	0.801841	0.761435	0.934562	0.826923	0.776635	0.930769	0.849498	0.76732	0.93311	0.695652	0.671512	0.556717	0.867396	13	SLE	boruta
split_1	Lymphocyte	0.652174	0.666667	0.769231	0.625531	0.530892	0.757697	0.615385	0.526923	0.748077	0.630954	0.578941	0.7307	0.275591	0.237004	0.055301	0.520841	6	chrX	boruta
split_1	Lymphocyte	0.826087	1	0.692308	0.935061	0.7301	0.913373	0.942308	0.769231	0.923077	0.949833	0.799331	0.93311	0.661765	0.877058	0.580119	0.839719	20	SLE	boruta
split_1	natural_killer_cell	0.608696	0.6	0.923077	0.595419	0.443252	0.650633	0.605769	0.478846	0.65	0.622701	0.555052	0.65	0.133891	0.311376	-0.055333	0.398167	8	chrX	boruta
split_1	natural_killer_cell	0.804348	0.84	0.807692	0.804816	0.709958	0.891564	0.803846	0.707692	0.892308	0.787157	0.700235	0.880256	0.604207	0.604792	0.418707	0.78087	32	SLE	boruta
split_1	NK_cell_Bright	0.717391	0.675676	0.961538	0.79038	0.56153	0.79038	0.775	0.580769	0.775	0.742857	0.608043	0.742857	0.386037	0.639196	0.238869	0.639196	8	chrX	boruta
split_1	NK_cell_Bright	0.782609	1	0.615385	0.778468	0.679041	0.869565	0.807692	0.730769	0.884615	0.832776	0.765886	0.899666	0.581818	0.640513	0.52105	0.769231	18	SLE	boruta
split_1	NK_cell_Dim	0.717391	0.882353	0.576923	0.595151	0.605507	0.824769	0.636538	0.642308	0.834904	0.658505	0.658505	0.846405	0.453382	0.294203	0.294203	0.671975	2	chrX	boruta
split_1	NK_cell_Dim	0.826087	0.875	0.807692	0.845807	0.737096	0.913043	0.836538	0.728846	0.911538	0.807404	0.722151	0.900331	0.65019	0.691262	0.464901	0.824319	20	SLE	boruta
split_1	Non_classical_monocyte	0.782609	0.833333	0.769231	0.740124	0.674693	0.871052	0.740385	0.682596	0.880769	0.7307	0.679885	0.863991	0.562738	0.477113	0.363641	0.769686	4	chrX	boruta
split_1	Non_classical_monocyte	0.869565	0.884615	0.884615	0.824769	0.783432	0.935061	0.846154	0.784615	0.942308	0.866221	0.766809	0.946295	0.734615	0.703211	0.564902	0.877058	18	SLE	boruta
split_1	Plasmablast	0.540541	0.578947	0.55	0.637879	0.401117	0.675676	0.635294	0.401471	0.67375	0.620108	0.499797	0.655073	0.079063	0.288063	-0.197059	0.347448	2	chrX	boruta
split_1	Plasmablast	0.756757	0.789474	0.75	0.637879	0.646075	0.864865	0.635294	0.644118	0.870588	0.620108	0.628829	0.84816	0.512445	0.288063	0.289946	0.741176	7	SLE	boruta
split_1	Plasmacytoid_DC	0.586957	1	0.269231	0.595794	0.392994	0.652281	0.673077	0.557692	0.711538	0.715719	0.615385	0.749164	0.242634	0.432562	0.231662	0.491689	6	chrX	boruta
split_1	Plasmacytoid_DC	0.695652	0.875	0.538462	0.640134	0.576092	0.801841	0.680769	0.619231	0.815385	0.699952	0.643684	0.829783	0.414545	0.389509	0.258303	0.640513	21	SLE	boruta
split_1	Progenitor_cell	0.477273	0.666667	0.16	0.456012	0.296931	0.518531	0.573684	0.448421	0.607368	0.621212	0.551429	0.654091	0.0488722	0.212708	-0.174928	0.291999	3	chrX	boruta
split_1	Progenitor_cell	0.636364	0.655172	0.76	0.669034	0.508264	0.746361	0.656842	0.497895	0.735789	0.659941	0.567152	0.720909	0.239741	0.340555	-0.00447774	0.488073	11	SLE	boruta
split_1	B_cell_Atypical	0.636364	1	0.333333	0.713287	0.458874	0.713287	0.75	0.583333	0.75	0.772727	0.621212	0.772727	0.3125	0.559017	0.288675	0.559017	14	chrX	enet
split_1	B_cell_Atypical	0.772727	0.888889	0.666667	0.793225	0.658068	0.886066	0.808333	0.679167	0.883542	0.809269	0.673295	0.88456	0.552846	0.630616	0.375	0.770786	9	SLE	enet
split_1	B_cell_Memory	0.695652	0.730769	0.730769	0.674693	0.581476	0.804816	0.671154	0.575	0.803846	0.672375	0.607333	0.787157	0.380769	0.340674	0.154648	0.606022	2	chrX	enet
split_1	B_cell_Memory	0.804348	0.84	0.807692	0.826087	0.695652	0.891769	0.823077	0.696058	0.898077	0.802933	0.692859	0.880256	0.604207	0.646154	0.389324	0.789352	9	SLE	enet
split_1	B_cell_Naive	0.673913	0.72	0.692308	0.653499	0.545428	0.782609	0.651923	0.551827	0.778846	0.658793	0.592605	0.761063	0.340344	0.301536	0.105184	0.557692	2	chrX	enet
split_1	B_cell_Naive	0.891304	1	0.807692	0.801841	0.824769	0.956687	0.826923	0.846154	0.961538	0.849498	0.866221	0.966555	0.785047	0.671512	0.703211	0.916057	10	SLE	enet
split_1	B_cell	0.688889	0.657143	0.92	0.587607	0.536058	0.770075	0.605	0.56	0.76	0.612991	0.587009	0.727025	0.336842	0.30697	0.167332	0.574297	2	chrX	enet
split_1	B_cell	0.711111	0.833333	0.6	0.732543	0.598635	0.820106	0.745	0.62	0.83	0.738947	0.633778	0.820952	0.434783	0.492967	0.252982	0.657376	11	SLE	enet
split_1	CD4_positive,_alpha_beta_T_cell	0.891304	0.92	0.884615	0.913373	0.804816	0.956687	0.923077	0.803846	0.961538	0.93311	0.79163	0.966555	0.780115	0.839719	0.60596	0.916057	2	chrX	enet
split_1	CD4_positive,_alpha_beta_T_cell	0.869565	0.833333	0.961538	0.891564	0.778295	0.934562	0.892308	0.767308	0.930769	0.879064	0.742857	0.912053	0.728346	0.78087	0.577497	0.872966	6	SLE	enet
split_1	CD4_T_cell_Effector_Memory	0.673913	0.689655	0.769231	0.695652	0.556591	0.780914	0.690385	0.546154	0.773077	0.686198	0.589298	0.751792	0.324853	0.380769	0.0960769	0.563545	2	chrX	enet
split_1	CD4_T_cell_Effector_Memory	0.913043	0.892857	0.961538	0.868548	0.843485	0.978187	0.861538	0.830481	0.975	0.834687	0.797173	0.962963	0.821012	0.734465	0.68927	0.95646	9	SLE	enet
split_1	CD4_T_cell_Naive	0.630435	0.736842	0.538462	0.608696	0.518116	0.740119	0.619231	0.536538	0.757692	0.637793	0.584634	0.755853	0.277264	0.238462	0.0742278	0.51709	2	chrX	enet
split_1	CD4_T_cell_Naive	0.869565	0.916667	0.846154	0.761891	0.783432	0.9562	0.765385	0.790385	0.950288	0.755853	0.780672	0.949833	0.737643	0.526235	0.576353	0.911538	5	SLE	enet
split_1	CD4_T_cell_Treg	0.652174	0.625	0.961538	0.443252	0.484894	0.697216	0.505769	0.522788	0.686538	0.568068	0.576687	0.676445	0.230126	0.0280484	0.0598927	0.483046	2	chrX	enet
split_1	CD4_T_cell_Treg	0.826087	0.909091	0.769231	0.8037	0.734161	0.913375	0.821154	0.740385	0.923077	0.829783	0.736901	0.929632	0.654135	0.646675	0.488564	0.839719	10	SLE	enet
split_1	CD8_positive,_alpha_beta_T_cell	0.847826	0.88	0.846154	0.891769	0.761435	0.934562	0.898077	0.759615	0.930769	0.896321	0.745819	0.916388	0.692161	0.789352	0.516752	0.867396	2	chrX	enet
split_1	CD8_positive,_alpha_beta_T_cell	0.804348	0.869565	0.769231	0.782609	0.696811	0.891769	0.778846	0.713462	0.903846	0.761063	0.709699	0.896321	0.608696	0.557692	0.428713	0.803837	11	SLE	enet
split_1	CD8_T_cell_Cytotoxic_GZMH_	0.695652	0.666667	0.923077	0.795203	0.557469	0.774671	0.780769	0.567019	0.761538	0.750177	0.600477	0.735786	0.342857	0.618233	0.175655	0.600925	2	chrX	enet
split_1	CD8_T_cell_Cytotoxic_GZMH_	0.826087	0.95	0.730769	0.913373	0.734161	0.913373	0.923077	0.757692	0.917308	0.93311	0.7644	0.916388	0.657993	0.839719	0.523501	0.828268	14	SLE	enet
split_1	CD8_T_cell_Cytotoxic_GZMK_	0.630435	0.695652	0.615385	0.718598	0.521739	0.740124	0.721154	0.525	0.748269	0.715719	0.578063	0.745819	0.26087	0.438529	0.0496198	0.503846	2	chrX	enet
split_1	CD8_T_cell_Cytotoxic_GZMK_	0.782609	0.944444	0.653846	0.659557	0.665336	0.870059	0.705769	0.7	0.884615	0.730383	0.715942	0.896321	0.577206	0.453089	0.422995	0.769231	12	SLE	enet
split_1	CD8_T_cell_MAIT	0.755556	0.705882	0.96	0.711111	0.620811	0.837498	0.705	0.63	0.825	0.680508	0.628538	0.78125	0.481675	0.490044	0.33541	0.695701	17	chrX	enet
split_1	CD8_T_cell_MAIT	0.822222	0.869565	0.8	0.843975	0.73138	0.911287	0.84	0.72975	0.915	0.811282	0.712	0.908406	0.643564	0.684117	0.459838	0.825064	12	SLE	enet
split_1	CD8_T_cell_Naive	0.630435	0.628571	0.846154	0.581476	0.494274	0.713642	0.571154	0.497981	0.703846	0.603621	0.564227	0.689474	0.206897	0.146153	-0.00545716	0.464398	1	chrX	enet
split_1	CD8_T_cell_Naive	0.73913	0.769231	0.769231	0.740124	0.619743	0.826749	0.740385	0.613462	0.834615	0.7307	0.630954	0.818779	0.469231	0.477113	0.235698	0.664141	5	SLE	enet
split_1	Classical_monocyte	0.673913	0.761905	0.615385	0.632013	0.556936	0.783432	0.632692	0.569231	0.790385	0.645485	0.604236	0.783293	0.35514	0.263117	0.142354	0.576353	1	chrX	enet
split_1	Classical_monocyte	0.826087	0.909091	0.769231	0.826746	0.737154	0.913373	0.834615	0.746154	0.917308	0.829735	0.740347	0.916388	0.654135	0.664141	0.488564	0.828268	14	SLE	enet
split_1	Conventional_DC	0.586957	0.585366	0.923077	0.50928	0.40597	0.610248	0.536538	0.465385	0.611538	0.583816	0.548877	0.626474	0.08	0.116387	-0.130744	0.351866	10	chrX	enet
split_1	Conventional_DC	0.847826	0.827586	0.923077	0.769928	0.754277	0.933917	0.755769	0.742308	0.925	0.728753	0.721545	0.912053	0.684932	0.577497	0.512475	0.867396	12	SLE	enet
split_1	Lymphocyte	0.543478	0.692308	0.346154	0.500686	0.402174	0.645549	0.584615	0.465385	0.675	0.622445	0.550167	0.697476	0.135957	0.211475	-0.0781575	0.388881	3	chrX	enet
split_1	Lymphocyte	0.826087	1	0.692308	0.778468	0.7301	0.913373	0.807692	0.769231	0.923077	0.832776	0.799331	0.93311	0.661765	0.640513	0.580119	0.839719	17	SLE	enet
split_1	natural_killer_cell	0.652174	0.692308	0.692308	0.649462	0.523561	0.76006	0.640385	0.525	0.753846	0.648053	0.578063	0.736901	0.292308	0.285191	0.0496198	0.511144	21	chrX	enet
split_1	natural_killer_cell	0.673913	0.923077	0.461538	0.704949	0.534557	0.757805	0.75	0.617308	0.788462	0.782609	0.652782	0.816054	0.382826	0.550482	0.286074	0.610089	15	SLE	enet
split_1	NK_cell_Bright	0.608696	0.785714	0.423077	0.576092	0.483782	0.71377	0.611538	0.542308	0.738462	0.636343	0.588211	0.74818	0.255396	0.235901	0.0880705	0.489809	2	chrX	enet
split_1	NK_cell_Bright	0.869565	0.884615	0.884615	0.934939	0.780914	0.936117	0.936538	0.773077	0.942692	0.929632	0.75565	0.93311	0.734615	0.868909	0.556445	0.878782	13	SLE	enet
split_1	NK_cell_Dim	0.673913	1	0.423077	0.624569	0.534557	0.75458	0.692308	0.634615	0.788462	0.732441	0.682274	0.816054	0.389381	0.46225	0.371574	0.610089	2	chrX	enet
split_1	NK_cell_Dim	0.826087	0.821429	0.884615	0.847311	0.733737	0.912365	0.842308	0.723077	0.905769	0.818779	0.707559	0.880256	0.642023	0.68927	0.464901	0.824319	14	SLE	enet
split_1	Non_classical_monocyte	0.891304	0.92	0.884615	0.870059	0.805165	0.956687	0.878846	0.809615	0.961538	0.879675	0.797164	0.962963	0.780115	0.75193	0.613941	0.916057	1	chrX	enet
split_1	Non_classical_monocyte	0.891304	0.92	0.884615	0.84819	0.804816	0.956687	0.848077	0.809615	0.961538	0.831572	0.79699	0.966555	0.780115	0.692831	0.613941	0.916057	12	SLE	enet
split_1	Plasmablast	0.594595	0.586207	0.85	0.640541	0.421344	0.686303	0.651471	0.463235	0.685294	0.628694	0.523066	0.654054	0.150077	0.385468	-0.0890136	0.437947	2	chrX	enet
split_1	Plasmablast	0.810811	0.882353	0.75	0.865063	0.701824	0.918679	0.866176	0.711765	0.916176	0.841607	0.696216	0.908108	0.624093	0.730208	0.429899	0.837293	95	SLE	enet
split_1	Plasmacytoid_DC	0.652174	0.727273	0.615385	0.585589	0.523551	0.780914	0.6	0.525	0.777019	0.624714	0.578063	0.767527	0.308271	0.20136	0.0496198	0.557616	15	chrX	enet
split_1	Plasmacytoid_DC	0.782609	0.863636	0.730769	0.826749	0.675306	0.870062	0.828846	0.694038	0.884615	0.815426	0.693144	0.882943	0.567669	0.652691	0.388897	0.769231	10	SLE	enet
split_1	Progenitor_cell	0.5	0.666667	0.24	0.388799	0.337333	0.573829	0.501053	0.448421	0.64	0.568701	0.550402	0.670808	0.0745698	0.00285104	-0.126676	0.328323	2	chrX	enet
split_1	Progenitor_cell	0.659091	0.777778	0.56	0.628788	0.52823	0.773668	0.661053	0.554474	0.781053	0.679455	0.598435	0.789773	0.334677	0.336589	0.111149	0.574737	8	SLE	enet
split_1	B_cell_Atypical	0.75	0.69697	0.958333	0.781911	0.613347	0.83416	0.775	0.628958	0.825	0.727273	0.618295	0.774194	0.47619	0.632456	0.32918	0.709384	14	chrX	enet
split_1	B_cell_Atypical	0.75	0.933333	0.583333	0.665501	0.628099	0.840498	0.704167	0.670833	0.854167	0.715593	0.678409	0.86572	0.514056	0.456531	0.386158	0.724356	9	SLE	enet
split_1	B_cell_Memory	0.673913	0.677419	0.807692	0.704183	0.539855	0.774671	0.692308	0.534615	0.765481	0.681768	0.582923	0.743423	0.316832	0.423448	0.0781575	0.563545	2	chrX	enet
split_1	B_cell_Memory	0.826087	0.875	0.807692	0.869565	0.718598	0.913375	0.884615	0.726923	0.917308	0.899666	0.722151	0.912974	0.65019	0.769231	0.464474	0.828268	9	SLE	enet
split_1	B_cell_Naive	0.652174	0.708333	0.653846	0.588721	0.523561	0.761441	0.588462	0.524904	0.765385	0.615385	0.578023	0.751995	0.30038	0.175412	0.0495791	0.526235	2	chrX	enet
split_1	B_cell_Naive	0.913043	1	0.846154	0.935061	0.847322	0.978313	0.942308	0.865385	0.980769	0.949833	0.882943	0.983278	0.827068	0.877058	0.735738	0.956949	10	SLE	enet
split_1	B_cell	0.777778	0.8	0.8	0.711686	0.662587	0.867063	0.71	0.655	0.87	0.695556	0.649048	0.855359	0.55	0.41833	0.317719	0.7356	2	chrX	enet
split_1	B_cell	0.755556	1	0.56	0.820106	0.640693	0.843367	0.84	0.7	0.86	0.857778	0.733333	0.875556	0.530806	0.696932	0.478091	0.730297	11	SLE	enet
split_1	CD4_positive,_alpha_beta_T_cell	0.782609	0.9	0.692308	0.891769	0.672834	0.870062	0.898077	0.694231	0.884615	0.896321	0.704308	0.896321	0.572491	0.789352	0.398957	0.769231	2	chrX	enet
split_1	CD4_positive,_alpha_beta_T_cell	0.826087	0.846154	0.846154	0.912365	0.733954	0.91306	0.905769	0.723077	0.911827	0.880256	0.714465	0.912053	0.646154	0.824319	0.464901	0.828268	6	SLE	enet
split_1	CD4_T_cell_Effector_Memory	0.76087	0.741935	0.884615	0.729606	0.645273	0.847311	0.717308	0.636538	0.842308	0.701035	0.643255	0.815426	0.49901	0.468239	0.325381	0.715626	2	chrX	enet
split_1	CD4_T_cell_Effector_Memory	0.913043	0.923077	0.923077	0.804816	0.845698	0.978187	0.803846	0.836442	0.975	0.787157	0.815426	0.966555	0.823077	0.604792	0.68927	0.95646	9	SLE	enet
split_1	CD4_T_cell_Naive	0.630435	0.736842	0.538462	0.695652	0.512629	0.740119	0.707692	0.530769	0.751923	0.709699	0.581271	0.755853	0.277264	0.415385	0.0634182	0.516542	2	chrX	enet
split_1	CD4_T_cell_Naive	0.804348	0.84	0.807692	0.782609	0.708961	0.891561	0.778846	0.703846	0.892308	0.761063	0.700235	0.879675	0.604207	0.557692	0.418707	0.78087	5	SLE	enet
split_1	CD4_T_cell_Treg	0.673913	0.648649	0.923077	0.707686	0.524297	0.744093	0.7	0.542308	0.731058	0.684211	0.586914	0.708865	0.291581	0.523148	0.11678	0.562331	2	chrX	enet
split_1	CD4_T_cell_Treg	0.847826	1	0.730769	0.913373	0.75458	0.913373	0.923077	0.788462	0.923077	0.93311	0.816054	0.93311	0.702403	0.839719	0.610089	0.839719	10	SLE	enet
split_1	CD8_positive,_alpha_beta_T_cell	0.73913	0.684211	1	0.763908	0.577153	0.79038	0.75	0.6	0.775	0.722222	0.619048	0.742857	0.429752	0.600925	0.351866	0.639196	2	chrX	enet
split_1	CD8_positive,_alpha_beta_T_cell	0.826087	0.846154	0.846154	0.804816	0.729606	0.913043	0.803846	0.726731	0.911538	0.787157	0.714465	0.896321	0.646154	0.604792	0.464901	0.824319	11	SLE	enet
split_1	CD8_T_cell_Cytotoxic_GZMH_	0.695652	0.6875	0.846154	0.697216	0.567651	0.783784	0.686538	0.559615	0.775192	0.676445	0.596635	0.751792	0.358566	0.43358	0.131269	0.600411	2	chrX	enet
split_1	CD8_T_cell_Cytotoxic_GZMH_	0.826087	0.846154	0.846154	0.826749	0.737096	0.913043	0.828846	0.728846	0.911538	0.815426	0.714807	0.896321	0.646154	0.652691	0.464901	0.824319	14	SLE	enet
split_1	CD8_T_cell_Cytotoxic_GZMK_	0.695652	0.676471	0.884615	0.622253	0.549118	0.79038	0.617308	0.553846	0.775	0.630388	0.593311	0.750177	0.350806	0.281973	0.125157	0.601119	2	chrX	enet
split_1	CD8_T_cell_Cytotoxic_GZMK_	0.782609	0.807692	0.807692	0.847311	0.674693	0.870062	0.842308	0.671154	0.873077	0.818779	0.67219	0.862598	0.557692	0.68927	0.343636	0.74048	12	SLE	enet
split_1	CD8_T_cell_MAIT	0.688889	0.73913	0.68	0.732543	0.577778	0.800398	0.745	0.575	0.8	0.738947	0.597222	0.784796	0.376238	0.492967	0.149404	0.597614	17	chrX	enet
split_1	CD8_T_cell_MAIT	0.777778	0.857143	0.72	0.62933	0.667656	0.866937	0.67	0.685	0.875	0.683419	0.680386	0.873016	0.558824	0.37275	0.37774	0.747018	12	SLE	enet
split_1	CD8_T_cell_Naive	0.608696	0.7	0.538462	0.486848	0.480237	0.718059	0.523077	0.5	0.726923	0.577258	0.565217	0.732023	0.230483	0.0488071	0	0.456365	1	chrX	enet
split_1	CD8_T_cell_Naive	0.73913	0.888889	0.615385	0.716456	0.620714	0.847322	0.732692	0.65	0.848077	0.73561	0.664962	0.863036	0.492647	0.468549	0.308106	0.703211	5	SLE	enet
split_1	Classical_monocyte	0.73913	0.71875	0.884615	0.677899	0.620246	0.826087	0.667308	0.611442	0.823077	0.663634	0.626713	0.791866	0.450199	0.377761	0.237004	0.677365	1	chrX	enet
split_1	Classical_monocyte	0.826087	0.78125	0.961538	0.819737	0.71669	0.911318	0.805769	0.705769	0.9	0.772941	0.689474	0.866667	0.633466	0.65885	0.477629	0.824319	14	SLE	enet
split_1	Conventional_DC	0.543478	0.592593	0.615385	0.457807	0.415495	0.653758	0.461538	0.413462	0.653846	0.547699	0.527592	0.658793	0.065764	-0.0765559	-0.180144	0.325381	10	chrX	enet
split_1	Conventional_DC	0.847826	0.827586	0.923077	0.913043	0.749693	0.913375	0.911538	0.736538	0.917308	0.895549	0.721254	0.896552	0.684932	0.823077	0.512475	0.832666	12	SLE	enet
split_1	Lymphocyte	0.630435	0.628571	0.846154	0.622253	0.480598	0.7096	0.617308	0.484615	0.698077	0.630388	0.557785	0.687453	0.206897	0.281973	-0.03698	0.451787	3	chrX	enet
split_1	Lymphocyte	0.847826	0.952381	0.769231	0.826087	0.759964	0.935061	0.840385	0.776923	0.942308	0.846405	0.780672	0.93311	0.699065	0.680769	0.557688	0.877058	17	SLE	enet
split_1	natural_killer_cell	0.73913	0.705882	0.923077	0.795203	0.610248	0.819737	0.780769	0.611538	0.805769	0.750177	0.626474	0.772941	0.443548	0.618233	0.277893	0.65885	21	chrX	enet
split_1	natural_killer_cell	0.826087	0.78125	0.961538	0.815942	0.71669	0.911318	0.8	0.705769	0.9	0.764706	0.689474	0.866667	0.633466	0.677365	0.468239	0.832666	15	SLE	enet
split_1	NK_cell_Bright	0.630435	0.645161	0.769231	0.645273	0.498307	0.733954	0.634615	0.496154	0.723077	0.643255	0.563336	0.707559	0.225743	0.280224	-0.00828742	0.477139	2	chrX	enet
split_1	NK_cell_Bright	0.826087	0.846154	0.846154	0.913043	0.733737	0.913043	0.911538	0.723077	0.911538	0.895549	0.714465	0.896552	0.646154	0.823077	0.464372	0.828268	13	SLE	enet
split_1	NK_cell_Dim	0.717391	0.882353	0.576923	0.71377	0.605918	0.824769	0.738462	0.647885	0.834615	0.74818	0.664962	0.849498	0.453382	0.489809	0.308106	0.671512	2	chrX	enet
split_1	NK_cell_Dim	0.782609	1	0.615385	0.652281	0.679041	0.869565	0.711538	0.730769	0.884615	0.749164	0.765886	0.899666	0.581818	0.491689	0.52105	0.769231	14	SLE	enet
split_1	Non_classical_monocyte	0.847826	0.88	0.846154	0.847311	0.757805	0.934562	0.842308	0.757692	0.930769	0.818779	0.743423	0.916388	0.692161	0.68927	0.516752	0.867396	1	chrX	enet
split_1	Non_classical_monocyte	0.891304	0.92	0.884615	0.869565	0.805184	0.956687	0.884615	0.811442	0.961538	0.899666	0.79699	0.966555	0.780115	0.769231	0.627067	0.916057	12	SLE	enet
split_1	Plasmablast	0.567568	0.558824	0.95	0.518831	0.366795	0.582987	0.563235	0.454412	0.617647	0.573997	0.51896	0.606061	0.0721003	0.202975	-0.153659	0.362906	2	chrX	enet
split_1	Plasmablast	0.72973	0.916667	0.55	0.751723	0.601556	0.835692	0.770588	0.641176	0.85	0.770062	0.644324	0.861049	0.474432	0.564938	0.316847	0.719299	95	SLE	enet
split_1	Plasmacytoid_DC	0.73913	0.75	0.807692	0.826087	0.632013	0.845807	0.823077	0.628846	0.836538	0.802933	0.638744	0.807404	0.463035	0.646154	0.277629	0.68927	15	chrX	enet
split_1	Plasmacytoid_DC	0.782609	0.833333	0.769231	0.718598	0.675306	0.870062	0.721154	0.682692	0.878942	0.715719	0.679885	0.879064	0.562738	0.438529	0.363641	0.752795	10	SLE	enet
split_1	Progenitor_cell	0.477273	1	0.08	0.308369	0.260462	0.43486	0.52	0.5	0.58	0.585455	0.568182	0.637273	0.0698529	0.132945	0	0.275681	2	chrX	enet
split_1	Progenitor_cell	0.568182	0.8	0.32	0.421911	0.404203	0.649279	0.488421	0.507368	0.7	0.562727	0.572	0.723636	0.196154	-0.0264906	0.0187317	0.442073	8	SLE	enet
split_1	B_cell_Atypical	0.568182	1	0.208333	0.458874	0.377171	0.597403	0.583333	0.541667	0.666667	0.621212	0.583333	0.69697	0.19305	0.288675	0.199205	0.430331	14	chrX	enet
split_1	B_cell_Atypical	0.636364	0.9	0.375	0.443228	0.479339	0.71866	0.558333	0.570833	0.75	0.587879	0.59053	0.772727	0.307087	0.183042	0.183042	0.559017	9	SLE	enet
split_1	B_cell_Memory	0.521739	1	0.153846	0.392994	0.309426	0.534557	0.557692	0.519231	0.634615	0.615385	0.58194	0.682274	0.136519	0.231662	0.130744	0.371574	2	chrX	enet
split_1	B_cell_Memory	0.673913	0.641026	0.961538	0.595419	0.50928	0.723913	0.605769	0.542308	0.711538	0.622701	0.586914	0.695062	0.282744	0.311376	0.123553	0.523148	9	SLE	enet
split_1	B_cell_Naive	0.630435	0.666667	0.692308	0.565217	0.51225	0.73913	0.575	0.501923	0.734615	0.607609	0.566165	0.722151	0.243714	0.15	0.0040032	0.469231	2	chrX	enet
split_1	B_cell_Naive	0.869565	1	0.769231	0.847322	0.778468	0.956687	0.865385	0.807692	0.961538	0.882943	0.832776	0.966555	0.743494	0.735738	0.640513	0.916057	10	SLE	enet
split_1	B_cell	0.777778	0.894737	0.68	0.888889	0.660694	0.86693	0.9	0.685	0.875	0.911111	0.689167	0.875556	0.563107	0.8	0.384085	0.747018	2	chrX	enet
split_1	B_cell	0.755556	0.791667	0.76	0.776203	0.645503	0.845947	0.77	0.65	0.86	0.742222	0.649048	0.841067	0.507463	0.547723	0.311223	0.73	11	SLE	enet
split_1	CD4_positive,_alpha_beta_T_cell	0.804348	0.869565	0.769231	0.718598	0.696812	0.891769	0.721154	0.707692	0.898365	0.715719	0.707559	0.896321	0.608696	0.438529	0.418707	0.790076	2	chrX	enet
split_1	CD4_positive,_alpha_beta_T_cell	0.782609	0.9	0.692308	0.80481	0.685117	0.870059	0.815385	0.701923	0.884615	0.813346	0.707559	0.895549	0.572491	0.627758	0.415385	0.769231	6	SLE	enet
split_1	CD4_T_cell_Effector_Memory	0.76087	0.777778	0.807692	0.693279	0.652174	0.866977	0.684615	0.648077	0.855769	0.679885	0.65571	0.834687	0.510638	0.375046	0.301536	0.734465	2	chrX	enet
split_1	CD4_T_cell_Effector_Memory	0.891304	0.92	0.884615	0.891564	0.824731	0.956687	0.892308	0.820962	0.961538	0.879064	0.802933	0.962963	0.780115	0.78087	0.646154	0.916057	9	SLE	enet
split_1	CD4_T_cell_Naive	0.586957	0.585366	0.923077	0.493841	0.39804	0.595419	0.490385	0.461538	0.605769	0.560545	0.546975	0.622701	0.08	-0.0217104	-0.165392	0.351866	2	chrX	enet
split_1	CD4_T_cell_Naive	0.73913	0.684211	1	0.815942	0.612589	0.815942	0.8	0.625	0.8	0.764706	0.634146	0.764706	0.429752	0.677365	0.398167	0.677365	5	SLE	enet
split_1	CD4_T_cell_Treg	0.652174	0.75	0.576923	0.73913	0.523542	0.761435	0.751923	0.536538	0.771154	0.751421	0.584634	0.76732	0.315985	0.503846	0.0742278	0.539719	2	chrX	enet
split_1	CD4_T_cell_Treg	0.891304	1	0.807692	0.824769	0.824769	0.956687	0.846154	0.846154	0.961538	0.866221	0.866221	0.966555	0.785047	0.703211	0.703211	0.916057	10	SLE	enet
split_1	CD8_positive,_alpha_beta_T_cell	0.76087	0.758621	0.846154	0.594409	0.652174	0.84819	0.584615	0.646154	0.848077	0.611204	0.651059	0.823021	0.504892	0.182323	0.325381	0.702345	2	chrX	enet
split_1	CD8_positive,_alpha_beta_T_cell	0.804348	0.84	0.807692	0.73913	0.716434	0.891769	0.734615	0.709615	0.898077	0.722151	0.700235	0.895549	0.604207	0.469231	0.422081	0.789352	11	SLE	enet
split_1	CD8_T_cell_Cytotoxic_GZMH_	0.673913	0.657143	0.884615	0.58587	0.528824	0.763908	0.578846	0.536442	0.75	0.607564	0.583771	0.728753	0.300203	0.178025	0.0865749	0.563545	2	chrX	enet
split_1	CD8_T_cell_Cytotoxic_GZMH_	0.695652	0.928571	0.5	0.71377	0.568772	0.801841	0.738462	0.628846	0.815673	0.74818	0.658505	0.832776	0.420863	0.489809	0.294203	0.640821	14	SLE	enet
split_1	CD8_T_cell_Cytotoxic_GZMK_	0.652174	0.777778	0.538462	0.545428	0.53147	0.761441	0.544231	0.56125	0.782692	0.588629	0.599672	0.783293	0.323529	0.0877058	0.126161	0.576353	2	chrX	enet
split_1	CD8_T_cell_Cytotoxic_GZMK_	0.826087	0.95	0.730769	0.80481	0.734161	0.913373	0.815385	0.757692	0.923077	0.813346	0.763434	0.929632	0.657993	0.627758	0.523501	0.839719	12	SLE	enet
split_1	CD8_T_cell_MAIT	0.733333	0.842105	0.64	0.778217	0.619605	0.822751	0.785	0.64	0.84	0.772698	0.648889	0.838384	0.475728	0.567734	0.290659	0.687256	17	chrX	enet
split_1	CD8_T_cell_MAIT	0.911111	0.888889	0.96	0.933132	0.840404	0.977711	0.93	0.83	0.975	0.908376	0.790222	0.961538	0.818182	0.865207	0.684117	0.955752	12	SLE	enet
split_1	CD8_T_cell_Naive	0.586957	0.62069	0.692308	0.631884	0.459142	0.69571	0.623077	0.457692	0.690385	0.634468	0.545596	0.686198	0.144814	0.277893	-0.0995227	0.389324	1	chrX	enet
split_1	CD8_T_cell_Naive	0.782609	0.944444	0.653846	0.757805	0.679041	0.870062	0.782692	0.713462	0.884615	0.796577	0.730383	0.899666	0.577206	0.58066	0.453089	0.769231	5	SLE	enet
split_1	Classical_monocyte	0.73913	0.71875	0.884615	0.7096	0.622253	0.843631	0.698077	0.615385	0.830769	0.687453	0.630388	0.797173	0.450199	0.418928	0.276379	0.691262	1	chrX	enet
split_1	Classical_monocyte	0.76087	0.894737	0.653846	0.80481	0.645549	0.848476	0.815385	0.669231	0.865385	0.813346	0.684075	0.866221	0.532348	0.627758	0.355696	0.735738	14	SLE	enet
split_1	Conventional_DC	0.565217	0.6875	0.423077	0.53147	0.43249	0.669734	0.567308	0.470962	0.694231	0.604236	0.552555	0.704308	0.163636	0.142354	-0.0658292	0.398957	10	chrX	enet
split_1	Conventional_DC	0.782609	0.9	0.692308	0.826746	0.674684	0.870059	0.834615	0.7	0.884615	0.829735	0.707396	0.882943	0.572491	0.664141	0.414654	0.769231	12	SLE	enet
split_1	Lymphocyte	0.608696	0.617647	0.807692	0.539855	0.464092	0.704183	0.534615	0.459615	0.692308	0.582923	0.546235	0.681768	0.165323	0.0781575	-0.0880705	0.423448	3	chrX	enet
split_1	Lymphocyte	0.76087	0.826087	0.730769	0.848186	0.653491	0.848476	0.859615	0.659615	0.859615	0.863036	0.666419	0.862598	0.521739	0.715798	0.326923	0.715798	17	SLE	enet
split_1	natural_killer_cell	0.652174	0.666667	0.769231	0.713642	0.530739	0.757815	0.703846	0.526923	0.748365	0.693576	0.578941	0.728866	0.275591	0.418707	0.055301	0.512475	21	chrX	enet
split_1	natural_killer_cell	0.717391	0.782609	0.692308	0.782609	0.605727	0.826087	0.778846	0.607596	0.823077	0.761063	0.627648	0.81345	0.434783	0.557692	0.213747	0.646767	15	SLE	enet
split_1	NK_cell_Bright	0.630435	0.628571	0.846154	0.610248	0.480598	0.704358	0.611538	0.490096	0.692596	0.626474	0.560407	0.68189	0.206897	0.291756	-0.025055	0.451787	2	chrX	enet
split_1	NK_cell_Bright	0.869565	0.857143	0.923077	0.843631	0.778295	0.934939	0.830769	0.767308	0.936538	0.797173	0.743423	0.928571	0.731518	0.699569	0.55763	0.872966	13	SLE	enet
split_1	NK_cell_Dim	0.76087	0.941176	0.615385	0.734161	0.649539	0.848186	0.763462	0.692308	0.865385	0.779996	0.709429	0.882943	0.537477	0.548439	0.414736	0.735738	2	chrX	enet
split_1	NK_cell_Dim	0.847826	1	0.730769	0.847322	0.75458	0.913373	0.865385	0.788462	0.923077	0.882943	0.816054	0.93311	0.702403	0.735738	0.610089	0.839719	14	SLE	enet
split_1	Non_classical_monocyte	0.847826	0.88	0.846154	0.803685	0.761367	0.934562	0.798077	0.759615	0.930769	0.776415	0.745819	0.916388	0.692161	0.600207	0.516752	0.867396	1	chrX	enet
split_1	Non_classical_monocyte	0.847826	0.806452	0.961538	0.798954	0.754277	0.933917	0.786538	0.742308	0.925	0.758118	0.721545	0.896552	0.681188	0.606022	0.536388	0.867472	12	SLE	enet
split_1	Plasmablast	0.648649	0.705882	0.6	0.622175	0.531032	0.757113	0.623529	0.539706	0.766176	0.616216	0.561664	0.748329	0.301887	0.246335	0.0791792	0.540359	2	chrX	enet
split_1	Plasmablast	0.567568	0.7	0.35	0.561844	0.414135	0.682655	0.577941	0.477941	0.711765	0.586583	0.530405	0.708628	0.166197	0.16018	-0.0495074	0.451337	95	SLE	enet
split_1	Plasmacytoid_DC	0.5	0.8	0.153846	0.469354	0.298525	0.534557	0.565385	0.488462	0.628846	0.60786	0.560201	0.665552	0.0926244	0.171029	-0.0405999	0.339683	15	chrX	enet
split_1	Plasmacytoid_DC	0.652174	0.727273	0.615385	0.625699	0.544558	0.761891	0.65	0.55	0.777019	0.664962	0.592133	0.767527	0.308271	0.308106	0.0995227	0.557616	10	SLE	enet
split_1	Progenitor_cell	0.545455	0.857143	0.24	0.523691	0.366771	0.605171	0.613684	0.513684	0.68	0.654091	0.576061	0.721515	0.168242	0.291999	0.0537829	0.430829	2	chrX	enet
split_1	Progenitor_cell	0.545455	0.631579	0.48	0.429763	0.423857	0.659972	0.443158	0.430526	0.668421	0.543636	0.538182	0.677589	0.107505	-0.114531	-0.137649	0.336589	8	SLE	enet
split_1	B_cell_Atypical	0.704545	0.823529	0.583333	0.679842	0.584091	0.817053	0.691667	0.608333	0.829167	0.680976	0.615801	0.828072	0.421053	0.388217	0.231626	0.66672	14	chrX	enet
split_1	B_cell_Atypical	0.772727	0.888889	0.666667	0.863919	0.671457	0.863636	0.866667	0.691458	0.871042	0.848485	0.680976	0.867424	0.552846	0.730297	0.388217	0.742561	9	SLE	enet
split_1	B_cell_Memory	0.73913	0.75	0.807692	0.689614	0.620246	0.826749	0.678846	0.609615	0.828846	0.67408	0.627648	0.807404	0.463035	0.372298	0.231834	0.65885	2	chrX	enet
split_1	B_cell_Memory	0.847826	0.913043	0.807692	0.870062	0.760078	0.934562	0.873077	0.765385	0.930769	0.862598	0.755853	0.93311	0.695652	0.74048	0.526235	0.867396	9	SLE	enet
split_1	B_cell_Naive	0.608696	1	0.307692	0.704949	0.43123	0.679041	0.75	0.576923	0.730769	0.782609	0.632107	0.765886	0.278746	0.550482	0.270666	0.52105	2	chrX	enet
split_1	B_cell_Naive	0.913043	0.958333	0.884615	0.891564	0.848186	0.978313	0.892308	0.853846	0.980769	0.879064	0.846154	0.983278	0.825095	0.78087	0.701646	0.956949	10	SLE	enet
split_1	B_cell	0.711111	0.772727	0.68	0.734127	0.600791	0.822222	0.735	0.605	0.825	0.719034	0.617778	0.806763	0.423645	0.467205	0.209165	0.646135	2	chrX	enet
split_1	B_cell	0.755556	0.888889	0.64	0.705934	0.643256	0.844906	0.73	0.67	0.86	0.734444	0.672889	0.873016	0.521739	0.477512	0.35	0.730297	11	SLE	enet
split_1	CD4_positive,_alpha_beta_T_cell	0.76087	0.826087	0.730769	0.80481	0.652174	0.869565	0.815385	0.651923	0.867308	0.813346	0.658793	0.862598	0.521739	0.627758	0.307777	0.735738	2	chrX	enet
split_1	CD4_positive,_alpha_beta_T_cell	0.869565	0.857143	0.923077	0.912365	0.780914	0.936117	0.905769	0.773077	0.942692	0.880256	0.751711	0.928624	0.731518	0.824319	0.557692	0.878782	6	SLE	enet
split_1	CD4_T_cell_Effector_Memory	0.717391	0.685714	0.923077	0.631884	0.594409	0.795203	0.623077	0.592308	0.780769	0.634468	0.615113	0.751792	0.393509	0.277893	0.228627	0.639196	2	chrX	enet
split_1	CD4_T_cell_Effector_Memory	0.891304	0.92	0.884615	0.978313	0.824731	0.956687	0.980769	0.817308	0.961538	0.983278	0.802753	0.966555	0.780115	0.956949	0.646154	0.916057	9	SLE	enet
split_1	CD4_T_cell_Naive	0.608696	0.785714	0.423077	0.52338	0.46683	0.709958	0.573077	0.528846	0.732692	0.60921	0.580653	0.74818	0.255396	0.16091	0.0635171	0.489809	2	chrX	enet
split_1	CD4_T_cell_Naive	0.804348	0.869565	0.769231	0.80481	0.708961	0.891769	0.815385	0.715288	0.898077	0.813346	0.709699	0.896321	0.608696	0.627758	0.428713	0.789352	5	SLE	enet
split_1	CD4_T_cell_Treg	0.652174	0.625	0.961538	0.595419	0.48053	0.707686	0.605769	0.525	0.7	0.622701	0.577778	0.684211	0.230126	0.311376	0.116387	0.494608	2	chrX	enet
split_1	CD4_T_cell_Treg	0.847826	0.952381	0.769231	0.870062	0.760078	0.935061	0.873077	0.776923	0.942308	0.862598	0.782512	0.949833	0.699065	0.74048	0.564541	0.877058	10	SLE	enet
split_1	CD8_positive,_alpha_beta_T_cell	0.782609	0.863636	0.730769	0.805184	0.675306	0.890936	0.809615	0.693942	0.886538	0.799331	0.694596	0.879675	0.567669	0.613941	0.389324	0.778333	2	chrX	enet
split_1	CD8_positive,_alpha_beta_T_cell	0.847826	0.913043	0.807692	0.826749	0.761435	0.934939	0.828846	0.771154	0.936538	0.815426	0.7644	0.93311	0.695652	0.652691	0.539719	0.868909	11	SLE	enet
split_1	CD8_T_cell_Cytotoxic_GZMH_	0.695652	0.666667	0.923077	0.743798	0.560934	0.769928	0.730769	0.567212	0.755769	0.708552	0.600614	0.728753	0.342857	0.536388	0.17606	0.577497	2	chrX	enet
split_1	CD8_T_cell_Cytotoxic_GZMH_	0.826087	0.846154	0.846154	0.84819	0.737096	0.913043	0.848077	0.728846	0.911538	0.831572	0.715719	0.899666	0.646154	0.692831	0.469181	0.828268	14	SLE	enet
split_1	CD8_T_cell_Cytotoxic_GZMK_	0.73913	0.818182	0.692308	0.76006	0.625699	0.848186	0.753846	0.632692	0.848077	0.736901	0.650251	0.846154	0.481203	0.511144	0.271763	0.692831	2	chrX	enet
split_1	CD8_T_cell_Cytotoxic_GZMK_	0.826087	0.95	0.730769	0.848186	0.734161	0.913373	0.859615	0.757692	0.917308	0.863036	0.7644	0.916388	0.657993	0.715798	0.523501	0.828268	12	SLE	enet
split_1	CD8_T_cell_MAIT	0.711111	0.8	0.64	0.685185	0.594976	0.821695	0.705	0.605	0.825	0.705621	0.617778	0.82	0.429268	0.420209	0.209165	0.646135	17	chrX	enet
split_1	CD8_T_cell_MAIT	0.8	0.807692	0.84	0.933132	0.69821	0.889116	0.93	0.69	0.895	0.908376	0.676742	0.873333	0.592965	0.865207	0.40996	0.785302	12	SLE	enet
split_1	CD8_T_cell_Naive	0.652174	0.65625	0.807692	0.716434	0.527533	0.754277	0.709615	0.521154	0.742308	0.700235	0.575898	0.721545	0.266932	0.422081	0.0447399	0.512475	1	chrX	enet
split_1	CD8_T_cell_Naive	0.73913	0.818182	0.692308	0.761891	0.629183	0.84819	0.765385	0.632692	0.848365	0.755853	0.647925	0.846405	0.481203	0.526235	0.271763	0.701646	5	SLE	enet
split_1	Classical_monocyte	0.673913	0.73913	0.653846	0.718598	0.565217	0.783432	0.721154	0.569231	0.790385	0.715719	0.603527	0.783293	0.347826	0.438529	0.137409	0.58066	1	chrX	enet
split_1	Classical_monocyte	0.804348	0.793103	0.884615	0.822636	0.7096	0.890936	0.811538	0.698077	0.886538	0.78194	0.687453	0.863991	0.594912	0.648519	0.418707	0.782114	14	SLE	enet
split_1	Conventional_DC	0.652174	0.647059	0.846154	0.592608	0.510806	0.743798	0.592308	0.509615	0.730769	0.615113	0.569995	0.714465	0.258065	0.2307	0.0223495	0.512475	10	chrX	enet
split_1	Conventional_DC	0.869565	0.954545	0.807692	0.848476	0.780962	0.956522	0.853846	0.797981	0.955769	0.846154	0.79699	0.949833	0.740602	0.701646	0.604792	0.911538	12	SLE	enet
split_1	Lymphocyte	0.565217	0.75	0.346154	0.530711	0.415217	0.652281	0.603846	0.490385	0.694231	0.637458	0.560657	0.715942	0.181495	0.249615	-0.0223495	0.432562	3	chrX	enet
split_1	Lymphocyte	0.826087	1	0.692308	0.891561	0.7301	0.913373	0.903846	0.769231	0.923077	0.916388	0.799331	0.93311	0.661765	0.803837	0.580119	0.839719	17	SLE	enet
split_1	natural_killer_cell	0.695652	0.730769	0.730769	0.761441	0.585558	0.801752	0.759615	0.576923	0.792308	0.745819	0.607333	0.776415	0.380769	0.516752	0.154892	0.600218	21	chrX	enet
split_1	natural_killer_cell	0.76087	0.777778	0.807692	0.804816	0.649462	0.868548	0.803846	0.640385	0.861538	0.787157	0.648053	0.846154	0.510638	0.604792	0.285191	0.734465	15	SLE	enet
split_1	NK_cell_Bright	0.608696	0.7	0.538462	0.581664	0.486848	0.718067	0.605769	0.505769	0.732692	0.63014	0.568084	0.730766	0.230483	0.217254	0.0114834	0.468549	2	chrX	enet
split_1	NK_cell_Bright	0.869565	0.916667	0.846154	0.890936	0.783432	0.936117	0.886538	0.790192	0.942692	0.863991	0.776167	0.949833	0.737643	0.778333	0.576353	0.878782	13	SLE	enet
split_1	NK_cell_Dim	0.673913	0.866667	0.5	0.704949	0.550167	0.778468	0.75	0.6	0.796154	0.782609	0.63014	0.813174	0.37613	0.550482	0.221446	0.610089	2	chrX	enet
split_1	NK_cell_Dim	0.804348	0.869565	0.769231	0.740124	0.695652	0.891564	0.740385	0.707692	0.898077	0.7307	0.707559	0.896321	0.608696	0.477113	0.415385	0.789352	14	SLE	enet
split_1	Non_classical_monocyte	0.76087	0.941176	0.615385	0.7301	0.659193	0.848186	0.769231	0.694231	0.865385	0.799331	0.715942	0.879675	0.537477	0.580119	0.422995	0.735738	1	chrX	enet
split_1	Non_classical_monocyte	0.891304	0.888889	0.923077	0.888308	0.804816	0.956522	0.875	0.805673	0.955769	0.83871	0.78194	0.946472	0.777563	0.793116	0.618233	0.914174	12	SLE	enet
split_1	Plasmablast	0.594595	0.592593	0.8	0.47921	0.436797	0.698688	0.492647	0.451471	0.694118	0.536921	0.518243	0.66463	0.157815	-0.0170817	-0.111343	0.437947	2	chrX	enet
split_1	Plasmablast	0.756757	0.923077	0.6	0.754975	0.633942	0.863875	0.766176	0.666176	0.875	0.752523	0.674891	0.883859	0.524964	0.540359	0.382755	0.761279	95	SLE	enet
split_1	Plasmacytoid_DC	0.73913	0.705882	0.923077	0.769928	0.604051	0.822636	0.755769	0.599904	0.811538	0.728753	0.619036	0.782201	0.443548	0.577497	0.238869	0.677365	15	chrX	enet
split_1	Plasmacytoid_DC	0.782609	0.833333	0.769231	0.934562	0.674684	0.870062	0.930769	0.676923	0.878846	0.912053	0.67893	0.879064	0.562738	0.867396	0.350823	0.75193	10	SLE	enet
split_1	Progenitor_cell	0.522727	0.642857	0.36	0.481053	0.396465	0.628788	0.528421	0.442105	0.661053	0.583287	0.545432	0.679455	0.0905512	0.0617113	-0.132453	0.336589	2	chrX	enet
split_1	Progenitor_cell	0.659091	0.692308	0.72	0.742424	0.54157	0.770785	0.729474	0.530526	0.762105	0.713515	0.583805	0.748312	0.300847	0.488073	0.0621076	0.533335	8	SLE	enet
split_1	B_cell_Atypical	0.704545	0.666667	0.916667	0.733447	0.557994	0.790493	0.729167	0.574792	0.783333	0.690657	0.585282	0.740857	0.380952	0.527046	0.169278	0.632456	14	chrX	enet
split_1	B_cell_Atypical	0.75	0.809524	0.708333	0.795773	0.636364	0.862775	0.795833	0.645833	0.858333	0.767622	0.638578	0.834461	0.502058	0.589826	0.295382	0.725	9	SLE	enet
split_1	B_cell_Memory	0.673913	0.689655	0.769231	0.769928	0.539855	0.774671	0.755769	0.532692	0.761731	0.728753	0.582064	0.743423	0.324853	0.577497	0.0693375	0.554755	2	chrX	enet
split_1	B_cell_Memory	0.804348	0.904762	0.730769	0.869565	0.709958	0.891769	0.884615	0.721154	0.903846	0.899666	0.722038	0.899666	0.613084	0.769231	0.451022	0.803837	9	SLE	enet
split_1	B_cell_Naive	0.652174	0.708333	0.653846	0.631318	0.523561	0.780914	0.626923	0.530769	0.776923	0.640268	0.581271	0.761063	0.30038	0.252634	0.0615385	0.557612	2	chrX	enet
split_1	B_cell_Naive	0.913043	1	0.846154	0.935061	0.847322	0.978313	0.942308	0.865385	0.980769	0.949833	0.882943	0.983278	0.827068	0.877058	0.735738	0.956949	10	SLE	enet
split_1	B_cell	0.8	0.863636	0.76	0.733333	0.705934	0.88911	0.73	0.705	0.89	0.710933	0.695906	0.890707	0.600985	0.46	0.418038	0.777	2	chrX	enet
split_1	B_cell	0.755556	0.888889	0.64	0.796416	0.655275	0.844906	0.82	0.675	0.86	0.84	0.68	0.857778	0.521739	0.664364	0.365148	0.730297	11	SLE	enet
split_1	CD4_positive,_alpha_beta_T_cell	0.782609	0.9	0.692308	0.780962	0.689855	0.870059	0.801923	0.707692	0.878846	0.813174	0.709699	0.882943	0.572491	0.613356	0.422995	0.75193	2	chrX	enet
split_1	CD4_positive,_alpha_beta_T_cell	0.804348	0.814815	0.846154	0.826087	0.704183	0.891564	0.823077	0.698077	0.892308	0.802933	0.693144	0.879064	0.599613	0.646154	0.418707	0.782114	6	SLE	enet
split_1	CD4_T_cell_Effector_Memory	0.76087	0.857143	0.692308	0.848186	0.653499	0.848476	0.859615	0.671154	0.859904	0.863036	0.679636	0.863036	0.527103	0.715798	0.343792	0.716739	2	chrX	enet
split_1	CD4_T_cell_Effector_Memory	0.847826	0.88	0.846154	0.84819	0.76006	0.934562	0.848077	0.753846	0.930769	0.831572	0.740347	0.916997	0.692161	0.692831	0.511144	0.867396	9	SLE	enet
split_1	CD4_T_cell_Naive	0.630435	0.736842	0.538462	0.568772	0.518116	0.75458	0.617308	0.542308	0.763462	0.643684	0.588211	0.763434	0.277264	0.258303	0.0877058	0.526235	2	chrX	enet
split_1	CD4_T_cell_Naive	0.804348	0.947368	0.692308	0.869565	0.704949	0.891561	0.884615	0.732692	0.903846	0.899666	0.748116	0.916388	0.617375	0.769231	0.489809	0.803837	5	SLE	enet
split_1	CD4_T_cell_Treg	0.673913	0.648649	0.923077	0.528824	0.524297	0.749693	0.542308	0.542308	0.736538	0.586914	0.586914	0.714807	0.291581	0.11678	0.11678	0.537391	2	chrX	enet
split_1	CD4_T_cell_Treg	0.891304	0.888889	0.923077	0.869565	0.819547	0.956522	0.867308	0.805769	0.955769	0.847762	0.78194	0.946295	0.777563	0.734615	0.64461	0.914174	10	SLE	enet
split_1	CD8_positive,_alpha_beta_T_cell	0.73913	0.684211	1	0.79038	0.612589	0.815942	0.775	0.625	0.8	0.742857	0.634146	0.764706	0.429752	0.639196	0.398167	0.677365	2	chrX	enet
split_1	CD8_positive,_alpha_beta_T_cell	0.826087	0.846154	0.846154	0.868548	0.733954	0.912365	0.861538	0.723077	0.905769	0.834687	0.707559	0.896321	0.646154	0.734465	0.464901	0.824319	11	SLE	enet
split_1	CD8_T_cell_Cytotoxic_GZMH_	0.695652	0.676471	0.884615	0.467909	0.56153	0.795203	0.457692	0.567212	0.780769	0.545596	0.600614	0.750177	0.350806	-0.0880705	0.175655	0.606022	2	chrX	enet
split_1	CD8_T_cell_Cytotoxic_GZMH_	0.847826	0.913043	0.807692	0.760078	0.760078	0.934939	0.776923	0.765385	0.936538	0.780672	0.755853	0.93311	0.695652	0.557612	0.526235	0.868909	14	SLE	enet
split_1	CD8_T_cell_Cytotoxic_GZMK_	0.695652	0.676471	0.884615	0.640537	0.575035	0.795203	0.636538	0.567308	0.780769	0.642231	0.600642	0.750177	0.350806	0.341244	0.175655	0.606022	2	chrX	enet
split_1	CD8_T_cell_Cytotoxic_GZMK_	0.782609	1	0.615385	0.75458	0.679041	0.869565	0.788462	0.730769	0.884615	0.816054	0.765886	0.899666	0.581818	0.610089	0.52105	0.769231	12	SLE	enet
split_1	CD8_T_cell_MAIT	0.688889	0.677419	0.84	0.72409	0.566279	0.794805	0.715	0.56	0.785	0.691183	0.587556	0.751111	0.350515	0.461539	0.126491	0.600833	17	chrX	enet
split_1	CD8_T_cell_MAIT	0.8	0.75	0.96	0.759259	0.69121	0.886003	0.75	0.685	0.875	0.714286	0.666797	0.833333	0.580311	0.597614	0.42781	0.790569	12	SLE	enet
split_1	CD8_T_cell_Naive	0.608696	0.7	0.538462	0.498345	0.480138	0.718598	0.511538	0.498077	0.732788	0.571026	0.564277	0.73561	0.230483	0.0232338	-0.0040032	0.468583	1	chrX	enet
split_1	CD8_T_cell_Naive	0.717391	0.76	0.730769	0.696812	0.608696	0.822636	0.696154	0.607692	0.815481	0.693144	0.627648	0.799331	0.428298	0.389324	0.213747	0.64461	5	SLE	enet
split_1	Classical_monocyte	0.73913	0.71875	0.884615	0.658672	0.610248	0.840714	0.648077	0.603846	0.825	0.651059	0.622682	0.788078	0.450199	0.326055	0.2307	0.68927	1	chrX	enet
split_1	Classical_monocyte	0.847826	0.806452	0.961538	0.933917	0.749693	0.933917	0.925	0.736538	0.925	0.896552	0.714807	0.896552	0.681188	0.872966	0.535726	0.867396	14	SLE	enet
split_1	Conventional_DC	0.521739	0.7	0.269231	0.485563	0.352355	0.595151	0.590385	0.465385	0.648077	0.632585	0.552508	0.682274	0.109155	0.249485	-0.0786005	0.355933	10	chrX	enet
split_1	Conventional_DC	0.847826	0.88	0.846154	0.891561	0.76006	0.934939	0.903846	0.753846	0.936538	0.916388	0.740347	0.929632	0.692161	0.803837	0.511144	0.868909	12	SLE	enet
split_1	Lymphocyte	0.586957	0.62069	0.692308	0.693279	0.467909	0.695652	0.684615	0.457692	0.690385	0.679885	0.545596	0.686198	0.144814	0.375046	-0.0880705	0.38829	3	chrX	enet
split_1	Lymphocyte	0.826087	0.95	0.730769	0.826746	0.734161	0.913373	0.834615	0.757404	0.923077	0.829735	0.764352	0.93311	0.657993	0.664141	0.523379	0.839719	17	SLE	enet
split_1	natural_killer_cell	0.652174	0.708333	0.653846	0.696805	0.544569	0.761441	0.701923	0.544231	0.765385	0.700897	0.588629	0.751792	0.30038	0.400775	0.0877058	0.526235	21	chrX	enet
split_1	natural_killer_cell	0.826087	0.821429	0.884615	0.824731	0.729606	0.913043	0.817308	0.717308	0.911538	0.791866	0.701035	0.895588	0.642023	0.64461	0.464372	0.828268	15	SLE	enet
split_1	NK_cell_Bright	0.630435	0.645161	0.769231	0.649462	0.498307	0.729606	0.640385	0.496154	0.717308	0.648053	0.563336	0.701035	0.225743	0.285191	-0.00828742	0.464372	2	chrX	enet
split_1	NK_cell_Bright	0.826087	0.821429	0.884615	0.870062	0.733954	0.912365	0.873077	0.723077	0.905769	0.862598	0.707469	0.88102	0.642023	0.74048	0.464874	0.824319	13	SLE	enet
split_1	NK_cell_Dim	0.717391	0.882353	0.576923	0.625699	0.605731	0.824769	0.65	0.642308	0.834615	0.664962	0.658505	0.846405	0.453382	0.308106	0.294203	0.671512	2	chrX	enet
split_1	NK_cell_Dim	0.76087	1	0.576923	0.801841	0.652281	0.847322	0.826923	0.711538	0.865385	0.849498	0.749164	0.882943	0.542495	0.671512	0.491689	0.735738	14	SLE	enet
split_1	Non_classical_monocyte	0.847826	0.88	0.846154	0.824731	0.76006	0.934939	0.817308	0.753846	0.936538	0.791866	0.740347	0.929632	0.692161	0.64461	0.511144	0.868909	1	chrX	enet
split_1	Non_classical_monocyte	0.869565	0.916667	0.846154	0.891769	0.783432	0.935061	0.898077	0.790385	0.942308	0.896321	0.780672	0.949833	0.737643	0.789352	0.576353	0.877058	12	SLE	enet
split_1	Plasmablast	0.540541	0.588235	0.5	0.482724	0.403667	0.67615	0.494118	0.405882	0.682353	0.537658	0.504358	0.666216	0.0870827	-0.0119416	-0.187684	0.36687	2	chrX	enet
split_1	Plasmablast	0.72973	0.75	0.75	0.621622	0.595189	0.83785	0.619118	0.598529	0.841176	0.611689	0.599126	0.819219	0.455882	0.238235	0.197059	0.680355	95	SLE	enet
split_1	Plasmacytoid_DC	0.652174	0.708333	0.653846	0.498345	0.541932	0.761441	0.511538	0.536346	0.765385	0.571026	0.584505	0.755853	0.30038	0.0232338	0.0738079	0.526235	15	chrX	enet
split_1	Plasmacytoid_DC	0.717391	0.76	0.730769	0.545428	0.608696	0.826087	0.544231	0.601923	0.828846	0.588629	0.623167	0.815426	0.428298	0.0877058	0.203846	0.652691	10	SLE	enet
split_1	Progenitor_cell	0.477273	1	0.08	0.50782	0.260462	0.43486	0.62	0.5	0.58	0.671818	0.568182	0.637273	0.0698529	0.34641	0	0.275681	2	chrX	enet
split_1	Progenitor_cell	0.568182	0.8	0.32	0.642651	0.404203	0.649279	0.693684	0.508421	0.7	0.721515	0.572424	0.738531	0.196154	0.430829	0.0230003	0.463977	8	SLE	enet
split_1	B_cell_Atypical	0.681818	0.75	0.625	0.795772	0.563476	0.795772	0.8	0.575	0.8	0.779221	0.588517	0.779527	0.368852	0.598134	0.150787	0.611527	7	chrX	intersection
split_1	B_cell_Atypical	0.772727	0.888889	0.666667	0.64518	0.65821	0.863636	0.679167	0.683125	0.870833	0.683275	0.680976	0.867424	0.552846	0.391071	0.388217	0.741667	5	SLE	intersection
split_1	B_cell_Memory	0.695652	0.730769	0.730769	0.73913	0.581476	0.804816	0.734615	0.572981	0.803846	0.722151	0.604029	0.787157	0.380769	0.469231	0.154455	0.604792	2	chrX	intersection
split_1	B_cell_Memory	0.826087	0.8	0.923077	0.864803	0.729606	0.912365	0.85	0.717308	0.905769	0.8125	0.701035	0.880256	0.637795	0.754155	0.464901	0.824319	8	SLE	intersection
split_1	B_cell_Naive	0.673913	0.72	0.692308	0.716434	0.549343	0.782609	0.709615	0.55	0.780865	0.700235	0.592133	0.76732	0.340344	0.422081	0.0995227	0.564902	2	chrX	intersection
split_1	B_cell_Naive	0.891304	1	0.807692	0.847322	0.824769	0.956687	0.865385	0.846154	0.961538	0.882943	0.866221	0.966555	0.785047	0.735738	0.703211	0.916057	7	SLE	intersection
split_1	B_cell	0.622222	0.75	0.48	0.550265	0.47973	0.730159	0.57	0.52475	0.745	0.595817	0.568507	0.751137	0.267943	0.143486	0.0510732	0.51245	1	chrX	intersection
split_1	B_cell	0.733333	0.882353	0.6	0.681111	0.615453	0.843367	0.71	0.65	0.85	0.717333	0.664314	0.857778	0.480769	0.442719	0.327968	0.696932	6	SLE	intersection
split_1	CD4_positive,_alpha_beta_T_cell	0.891304	0.92	0.884615	0.913043	0.804816	0.956687	0.911538	0.803846	0.961538	0.895549	0.787157	0.966555	0.780115	0.823077	0.606022	0.916057	2	chrX	intersection
split_1	CD4_positive,_alpha_beta_T_cell	0.869565	0.833333	0.961538	0.889862	0.774671	0.934562	0.880769	0.761538	0.930769	0.850652	0.735786	0.912053	0.728346	0.782114	0.577497	0.872966	6	SLE	intersection
split_1	CD4_T_cell_Effector_Memory	0.673913	0.689655	0.769231	0.675306	0.541828	0.778295	0.676923	0.534615	0.767308	0.67893	0.582923	0.745819	0.324853	0.350823	0.0765559	0.556445	2	chrX	intersection
split_1	CD4_T_cell_Effector_Memory	0.891304	0.83871	1	0.864803	0.815942	0.956183	0.85	0.8	0.95	0.8125	0.764706	0.928571	0.772277	0.754155	0.677365	0.914174	5	SLE	intersection
split_1	CD4_T_cell_Naive	0.673913	0.761905	0.615385	0.718059	0.565217	0.783432	0.726923	0.575	0.796154	0.724956	0.607609	0.787157	0.35514	0.45168	0.15	0.592308	1	chrX	intersection
split_1	CD4_T_cell_Naive	0.869565	0.916667	0.846154	0.891564	0.783391	0.956522	0.892308	0.790385	0.955769	0.879064	0.776415	0.949833	0.737643	0.78087	0.576353	0.911538	5	SLE	intersection
split_1	CD4_T_cell_Treg	0.652174	0.638889	0.884615	0.688465	0.512811	0.737431	0.680769	0.523077	0.728942	0.671427	0.576835	0.708552	0.24898	0.451787	0.0603633	0.520841	1	chrX	intersection
split_1	CD4_T_cell_Treg	0.826087	0.95	0.730769	0.780962	0.737005	0.913373	0.801923	0.757692	0.923077	0.813174	0.7644	0.93311	0.657993	0.613356	0.526098	0.839719	9	SLE	intersection
split_1	CD8_positive,_alpha_beta_T_cell	0.847826	0.88	0.846154	0.890936	0.76006	0.934939	0.886538	0.753846	0.936538	0.863991	0.740347	0.929632	0.692161	0.778333	0.511144	0.868909	2	chrX	intersection
split_1	CD8_positive,_alpha_beta_T_cell	0.847826	0.913043	0.807692	0.805184	0.761435	0.934939	0.809615	0.771154	0.936538	0.799331	0.761063	0.93311	0.695652	0.613941	0.539719	0.868909	8	SLE	intersection
split_1	CD8_T_cell_Cytotoxic_GZMH_	0.608696	0.611111	0.846154	0.512811	0.448823	0.688465	0.523077	0.465385	0.680769	0.576835	0.548877	0.671427	0.155102	0.0603633	-0.0814819	0.423448	1	chrX	intersection
split_1	CD8_T_cell_Cytotoxic_GZMH_	0.826087	0.875	0.807692	0.848186	0.73913	0.91306	0.859615	0.738462	0.911827	0.863036	0.728671	0.912053	0.65019	0.715798	0.477113	0.824517	7	SLE	intersection
split_1	CD8_T_cell_Cytotoxic_GZMK_	0.826087	1	0.692308	0.913373	0.7301	0.913373	0.923077	0.769231	0.923077	0.93311	0.799331	0.93311	0.661765	0.839719	0.580119	0.839719	5	SLE	intersection
split_1	CD8_T_cell_MAIT	0.733333	0.685714	0.96	0.711111	0.602663	0.81245	0.705	0.61	0.80025	0.680508	0.616336	0.758463	0.431579	0.490044	0.285931	0.6742	5	chrX	intersection
split_1	CD8_T_cell_MAIT	0.777778	0.857143	0.72	0.8	0.666667	0.867063	0.81	0.675	0.88	0.803556	0.672222	0.875556	0.558824	0.62	0.35	0.764601	5	SLE	intersection
split_1	CD8_T_cell_Naive	0.717391	0.782609	0.692308	0.674693	0.601242	0.824731	0.671154	0.607596	0.821154	0.672375	0.627648	0.815426	0.434783	0.340674	0.217079	0.646675	4	SLE	intersection
split_1	Classical_monocyte	0.673913	0.761905	0.615385	0.718067	0.561674	0.783437	0.715385	0.569231	0.798269	0.707559	0.604236	0.79699	0.35514	0.428713	0.142354	0.600437	1	chrX	intersection
split_1	Classical_monocyte	0.847826	0.851852	0.884615	0.889862	0.757526	0.934562	0.880769	0.748077	0.930769	0.850652	0.728866	0.912099	0.688588	0.782114	0.509559	0.867396	10	SLE	intersection
split_1	Conventional_DC	0.630435	0.628571	0.846154	0.613162	0.486216	0.71669	0.603846	0.490385	0.705769	0.622682	0.560545	0.689474	0.206897	0.228662	-0.0217104	0.465067	1	chrX	intersection
split_1	Conventional_DC	0.869565	0.954545	0.807692	0.934939	0.783432	0.95653	0.936538	0.8075	0.956058	0.929632	0.802753	0.950489	0.740602	0.868909	0.613911	0.911764	8	SLE	intersection
split_1	Lymphocyte	0.543478	0.857143	0.230769	0.436569	0.36599	0.605918	0.546154	0.513462	0.673077	0.593884	0.573021	0.713907	0.162912	0.127397	0.0540545	0.421182	1	chrX	intersection
split_1	Lymphocyte	0.847826	0.952381	0.769231	0.80481	0.757805	0.934939	0.815385	0.776923	0.936538	0.813346	0.780672	0.93311	0.699065	0.627758	0.557612	0.868909	8	SLE	intersection
split_1	natural_killer_cell	0.608696	0.666667	0.615385	0.588721	0.480248	0.718598	0.588462	0.486538	0.726923	0.615385	0.558779	0.716041	0.212928	0.175412	-0.0269231	0.452314	8	chrX	intersection
split_1	natural_killer_cell	0.782609	0.944444	0.653846	0.780962	0.679041	0.870059	0.801923	0.713462	0.884615	0.813174	0.730383	0.899666	0.577206	0.613356	0.453089	0.769231	9	SLE	intersection
split_1	NK_cell_Bright	0.608696	0.785714	0.423077	0.620714	0.46683	0.710148	0.655769	0.523077	0.744231	0.673579	0.577258	0.763434	0.255396	0.329448	0.0488071	0.516542	2	chrX	intersection
split_1	NK_cell_Bright	0.804348	0.947368	0.692308	0.824769	0.704949	0.891561	0.846154	0.732692	0.903846	0.866221	0.746894	0.916388	0.617375	0.703211	0.484814	0.803837	6	SLE	intersection
split_1	NK_cell_Dim	0.673913	1	0.423077	0.652281	0.534557	0.75458	0.711538	0.634615	0.788462	0.749164	0.682274	0.816054	0.389381	0.491689	0.371574	0.610089	2	chrX	intersection
split_1	NK_cell_Dim	0.804348	0.869565	0.769231	0.674684	0.696811	0.892798	0.682692	0.707692	0.903942	0.686256	0.707559	0.899666	0.608696	0.363641	0.418541	0.804799	8	SLE	intersection
split_1	Non_classical_monocyte	0.891304	0.92	0.884615	0.978187	0.804816	0.956687	0.975	0.809615	0.961538	0.962963	0.791866	0.966555	0.780115	0.95646	0.613941	0.916057	1	chrX	intersection
split_1	Non_classical_monocyte	0.847826	0.88	0.846154	0.804816	0.761441	0.913375	0.803846	0.759615	0.923077	0.787157	0.745819	0.916388	0.692161	0.604792	0.516752	0.839719	4	SLE	intersection
split_1	Plasmablast	0.486486	0.6	0.15	0.411031	0.296962	0.531308	0.516176	0.432353	0.6	0.549459	0.523514	0.632432	0.0303448	0.0471621	-0.202975	0.320983	1	chrX	intersection
split_1	Plasmablast	0.675676	0.722222	0.65	0.703138	0.540541	0.7841	0.702941	0.552721	0.795588	0.677952	0.570319	0.774662	0.35277	0.404694	0.109931	0.607475	7	SLE	intersection
split_1	Plasmacytoid_DC	0.586957	0.666667	0.538462	0.468323	0.460133	0.696805	0.498077	0.475	0.707692	0.564277	0.553442	0.709699	0.183178	-0.0040032	-0.0496198	0.415765	6	chrX	intersection
split_1	Plasmacytoid_DC	0.76087	0.826087	0.730769	0.740124	0.653499	0.869565	0.740385	0.665288	0.867308	0.7307	0.671823	0.862598	0.521739	0.477113	0.33276	0.734615	7	SLE	intersection
split_1	Progenitor_cell	0.568182	0.6	0.72	0.56658	0.433002	0.669034	0.556842	0.431579	0.656842	0.598392	0.53761	0.659941	0.0913043	0.114531	-0.144648	0.340989	1	chrX	intersection
split_1	Progenitor_cell	0.613636	0.833333	0.4	0.770845	0.470085	0.703568	0.793684	0.547105	0.74	0.806898	0.594903	0.772667	0.272374	0.597518	0.102988	0.530183	4	SLE	intersection
split_1	B_cell_Atypical	0.75	0.69697	0.958333	0.754441	0.616883	0.83416	0.75	0.629167	0.825	0.705882	0.618448	0.77423	0.47619	0.594089	0.316228	0.709384	7	chrX	intersection
split_1	B_cell_Atypical	0.863636	0.821429	0.958333	0.908517	0.7653	0.93164	0.904167	0.758333	0.929167	0.870484	0.717677	0.904394	0.720339	0.818631	0.55234	0.869227	5	SLE	intersection
split_1	B_cell_Memory	0.673913	0.677419	0.807692	0.782609	0.549343	0.774671	0.778846	0.540385	0.761538	0.761063	0.586068	0.736901	0.316832	0.557692	0.0870179	0.554755	2	chrX	intersection
split_1	B_cell_Memory	0.826087	0.821429	0.884615	0.869565	0.729321	0.912365	0.867308	0.717308	0.905769	0.847762	0.707469	0.895549	0.642023	0.734615	0.464372	0.824319	8	SLE	intersection
split_1	B_cell_Naive	0.652174	0.708333	0.653846	0.600932	0.523561	0.761441	0.590385	0.530769	0.765481	0.614994	0.581271	0.755853	0.30038	0.188151	0.0615385	0.526909	2	chrX	intersection
split_1	B_cell_Naive	0.891304	1	0.807692	0.847322	0.801841	0.956687	0.865385	0.826923	0.961538	0.882943	0.849498	0.966555	0.785047	0.735738	0.671512	0.916057	7	SLE	intersection
split_1	B_cell	0.755556	0.9375	0.6	0.681111	0.648574	0.844444	0.71	0.68975	0.86	0.717333	0.700317	0.875556	0.526316	0.442719	0.407872	0.730297	1	chrX	intersection
split_1	B_cell	0.777778	1	0.6	0.843367	0.668724	0.866271	0.86	0.72	0.88	0.875556	0.751111	0.893333	0.571429	0.730297	0.508747	0.764601	6	SLE	intersection
split_1	CD4_positive,_alpha_beta_T_cell	0.782609	0.9	0.692308	0.760078	0.689618	0.870059	0.776923	0.707596	0.884615	0.780672	0.709699	0.896321	0.572491	0.557612	0.415385	0.769231	2	chrX	intersection
split_1	CD4_positive,_alpha_beta_T_cell	0.826087	0.846154	0.846154	0.847311	0.733954	0.913375	0.842308	0.726923	0.917308	0.818779	0.714465	0.900285	0.646154	0.68927	0.464372	0.828268	6	SLE	intersection
split_1	CD4_T_cell_Effector_Memory	0.76087	0.741935	0.884615	0.743798	0.645273	0.847311	0.730769	0.636538	0.842308	0.708552	0.643255	0.818779	0.49901	0.536388	0.325381	0.699569	2	chrX	intersection
split_1	CD4_T_cell_Effector_Memory	0.869565	0.916667	0.846154	0.933917	0.783432	0.935061	0.925	0.784615	0.942308	0.896552	0.776415	0.946295	0.737643	0.872966	0.57578	0.877058	5	SLE	intersection
split_1	CD4_T_cell_Naive	0.673913	0.789474	0.576923	0.737154	0.556936	0.783437	0.757692	0.586538	0.801923	0.7644	0.616874	0.799331	0.362292	0.523501	0.179908	0.613356	1	chrX	intersection
split_1	CD4_T_cell_Naive	0.804348	0.84	0.807692	0.718598	0.708961	0.891769	0.721154	0.703846	0.898077	0.715719	0.700235	0.883573	0.604207	0.438529	0.418707	0.789352	5	SLE	intersection
split_1	CD4_T_cell_Treg	0.695652	0.7	0.807692	0.718067	0.574666	0.801752	0.715385	0.565385	0.792308	0.707559	0.600065	0.766834	0.366142	0.428713	0.138287	0.601119	1	chrX	intersection
split_1	CD4_T_cell_Treg	0.869565	0.954545	0.807692	0.848186	0.782609	0.935061	0.859615	0.801923	0.942308	0.863036	0.799331	0.949833	0.740602	0.715798	0.613356	0.877058	9	SLE	intersection
split_1	CD8_positive,_alpha_beta_T_cell	0.73913	0.684211	1	0.677617	0.612589	0.815942	0.675	0.625	0.8	0.666667	0.634146	0.764706	0.429752	0.483046	0.398167	0.677365	2	chrX	intersection
split_1	CD8_positive,_alpha_beta_T_cell	0.826087	0.875	0.807692	0.718067	0.73913	0.913375	0.715385	0.740385	0.917308	0.707559	0.7307	0.912974	0.65019	0.428713	0.477113	0.828268	8	SLE	intersection
split_1	CD8_T_cell_Cytotoxic_GZMH_	0.630435	0.609756	0.961538	0.539382	0.443252	0.669472	0.575	0.505769	0.661538	0.604651	0.568068	0.658863	0.176842	0.301161	0.0280484	0.441588	1	chrX	intersection
split_1	CD8_T_cell_Cytotoxic_GZMH_	0.826087	0.821429	0.884615	0.761891	0.737096	0.913043	0.765385	0.728846	0.911538	0.755853	0.714465	0.895549	0.642023	0.526235	0.468072	0.824319	7	SLE	intersection
split_1	CD8_T_cell_Cytotoxic_GZMK_	0.869565	0.916667	0.846154	0.891769	0.783432	0.956522	0.898077	0.790385	0.955769	0.896321	0.780639	0.949833	0.737643	0.789352	0.576353	0.911538	5	SLE	intersection
split_1	CD8_T_cell_MAIT	0.711111	0.6875	0.88	0.641925	0.584637	0.797552	0.635	0.58	0.79	0.635556	0.59914	0.758095	0.393782	0.273861	0.171736	0.61504	5	chrX	intersection
split_1	CD8_T_cell_MAIT	0.777778	1	0.6	0.820106	0.668724	0.866271	0.84	0.72	0.88	0.857778	0.751111	0.893333	0.571429	0.696932	0.508747	0.764601	5	SLE	intersection
split_1	CD8_T_cell_Naive	0.76087	0.894737	0.653846	0.737154	0.665336	0.849531	0.757692	0.688462	0.865769	0.7644	0.699828	0.879675	0.532348	0.523501	0.389499	0.735975	4	SLE	intersection
split_1	Classical_monocyte	0.73913	0.71875	0.884615	0.693279	0.610248	0.826818	0.684615	0.603846	0.823173	0.679885	0.622682	0.792131	0.450199	0.375046	0.2307	0.67796	1	chrX	intersection
split_1	Classical_monocyte	0.826087	0.909091	0.769231	0.73913	0.737154	0.913373	0.751923	0.744038	0.917308	0.751421	0.740347	0.916388	0.654135	0.503846	0.488564	0.828268	10	SLE	intersection
split_1	Conventional_DC	0.608696	0.611111	0.846154	0.528824	0.448823	0.68454	0.542308	0.465385	0.673077	0.586914	0.548877	0.668687	0.155102	0.11678	-0.0804582	0.407452	1	chrX	intersection
split_1	Conventional_DC	0.891304	0.888889	0.923077	0.774671	0.805165	0.956687	0.761538	0.803846	0.961538	0.735786	0.78194	0.962963	0.777563	0.563545	0.613941	0.916057	8	SLE	intersection
split_1	Lymphocyte	0.565217	0.65	0.5	0.588721	0.436924	0.695652	0.588462	0.455769	0.701923	0.615385	0.545151	0.704308	0.144981	0.175412	-0.0877058	0.400775	1	chrX	intersection
split_1	Lymphocyte	0.804348	0.947368	0.692308	0.801841	0.695652	0.891561	0.826923	0.725	0.903846	0.849498	0.73561	0.916388	0.617375	0.671512	0.468549	0.803837	8	SLE	intersection
split_1	natural_killer_cell	0.652174	0.638889	0.884615	0.56153	0.510806	0.734076	0.567308	0.522981	0.723173	0.600642	0.576788	0.702703	0.24898	0.17606	0.0598927	0.520841	8	chrX	intersection
split_1	natural_killer_cell	0.847826	0.88	0.846154	0.782609	0.761441	0.934939	0.778846	0.759615	0.936538	0.761063	0.745819	0.929632	0.692161	0.557692	0.516752	0.868909	9	SLE	intersection
split_1	NK_cell_Bright	0.630435	0.645161	0.769231	0.604051	0.504277	0.733954	0.598077	0.501731	0.723077	0.618825	0.56607	0.707469	0.225743	0.227965	0.00353763	0.468239	2	chrX	intersection
split_1	NK_cell_Bright	0.847826	0.952381	0.769231	0.891769	0.757805	0.934939	0.898077	0.776635	0.936538	0.896321	0.780672	0.93311	0.699065	0.789352	0.557612	0.868909	6	SLE	intersection
split_1	NK_cell_Dim	0.717391	0.882353	0.576923	0.693347	0.595151	0.805184	0.713462	0.636538	0.826923	0.7199	0.657631	0.846405	0.453382	0.433647	0.292213	0.671512	2	chrX	intersection
split_1	NK_cell_Dim	0.782609	1	0.615385	0.778468	0.679041	0.869565	0.807692	0.730769	0.884615	0.832776	0.765886	0.899666	0.581818	0.640513	0.52105	0.769231	8	SLE	intersection
split_1	Non_classical_monocyte	0.847826	0.88	0.846154	0.826087	0.761441	0.934562	0.823077	0.759615	0.930769	0.802933	0.745819	0.928624	0.692161	0.646154	0.516752	0.867396	1	chrX	intersection
split_1	Non_classical_monocyte	0.891304	0.862069	0.961538	0.774671	0.801752	0.956522	0.761538	0.792308	0.955769	0.735786	0.766704	0.946295	0.774951	0.563545	0.618233	0.914174	4	SLE	intersection
split_1	Plasmablast	0.621622	0.636364	0.7	0.662078	0.500033	0.753472	0.660294	0.501471	0.748529	0.63685	0.541273	0.709741	0.231454	0.349546	0.00307032	0.510763	1	chrX	intersection
split_1	Plasmablast	0.783784	0.833333	0.75	0.703138	0.673169	0.891892	0.702941	0.673529	0.895588	0.677952	0.654886	0.883859	0.568513	0.404694	0.347059	0.78886	7	SLE	intersection
split_1	Plasmacytoid_DC	0.673913	0.648649	0.923077	0.688465	0.527817	0.749693	0.680769	0.542019	0.736538	0.671427	0.586759	0.714807	0.291581	0.451787	0.116761	0.562331	6	chrX	intersection
split_1	Plasmacytoid_DC	0.782609	0.9	0.692308	0.783432	0.669734	0.870062	0.790385	0.694231	0.884615	0.783293	0.700897	0.882943	0.572491	0.576353	0.398957	0.769231	7	SLE	intersection
split_1	Progenitor_cell	0.568182	0.636364	0.56	0.545455	0.450021	0.683144	0.555789	0.444211	0.694789	0.598612	0.543636	0.692165	0.136364	0.111579	-0.111579	0.390414	1	chrX	intersection
split_1	Progenitor_cell	0.568182	0.6875	0.44	0.562131	0.439231	0.679183	0.588421	0.482105	0.701053	0.620682	0.55986	0.711176	0.167331	0.182093	-0.0388552	0.409054	4	SLE	intersection
split_1	B_cell_Atypical	0.75	0.685714	1	0.725891	0.597403	0.808442	0.725	0.625	0.8	0.685714	0.615385	0.75	0.471616	0.555492	0.392232	0.67082	7	chrX	intersection
split_1	B_cell_Atypical	0.818182	0.863636	0.791667	0.795773	0.725577	0.909279	0.795833	0.725	0.9125	0.767622	0.698864	0.903409	0.636364	0.589826	0.45	0.821584	5	SLE	intersection
split_1	B_cell_Memory	0.521739	1	0.153846	0.43123	0.309426	0.534557	0.576923	0.519231	0.634615	0.632107	0.58194	0.682274	0.136519	0.270666	0.130744	0.371574	2	chrX	intersection
split_1	B_cell_Memory	0.782609	0.785714	0.846154	0.737096	0.672809	0.869565	0.728846	0.665385	0.867308	0.714465	0.666419	0.847762	0.552529	0.464901	0.333018	0.734615	8	SLE	intersection
split_1	B_cell_Naive	0.630435	0.666667	0.692308	0.521739	0.502089	0.740119	0.513462	0.496154	0.740385	0.571971	0.563336	0.725152	0.243714	0.0269231	-0.00828742	0.477113	2	chrX	intersection
split_1	B_cell_Naive	0.804348	0.869565	0.769231	0.780914	0.713579	0.911371	0.773077	0.713462	0.903942	0.751792	0.707559	0.896321	0.608696	0.554755	0.428713	0.823077	7	SLE	intersection
split_1	B_cell	0.733333	0.740741	0.8	0.66733	0.617599	0.842541	0.665	0.61	0.835	0.659444	0.618413	0.800159	0.454545	0.328688	0.225478	0.686683	1	chrX	intersection
split_1	B_cell	0.733333	0.740741	0.8	0.711686	0.622974	0.840404	0.71	0.62	0.83	0.695556	0.623434	0.800329	0.454545	0.41833	0.239046	0.684117	6	SLE	intersection
split_1	CD4_positive,_alpha_beta_T_cell	0.804348	0.869565	0.769231	0.826746	0.695652	0.891564	0.834615	0.70375	0.892596	0.829735	0.700897	0.895549	0.608696	0.664141	0.415385	0.789352	2	chrX	intersection
split_1	CD4_positive,_alpha_beta_T_cell	0.782609	0.9	0.692308	0.780962	0.672834	0.870062	0.801923	0.694231	0.884615	0.813174	0.70085	0.896321	0.572491	0.613356	0.398485	0.769231	6	SLE	intersection
split_1	CD4_T_cell_Effector_Memory	0.76087	0.777778	0.807692	0.826087	0.652174	0.864912	0.823077	0.646154	0.855769	0.802933	0.653203	0.834687	0.510638	0.646154	0.292308	0.734465	2	chrX	intersection
split_1	CD4_T_cell_Effector_Memory	0.891304	0.92	0.884615	0.912365	0.804816	0.956687	0.905769	0.809615	0.961538	0.880256	0.796734	0.962963	0.780115	0.824319	0.613941	0.916057	5	SLE	intersection
split_1	CD4_T_cell_Naive	0.630435	0.666667	0.692308	0.7096	0.502136	0.740119	0.698077	0.5	0.740385	0.687453	0.565217	0.728758	0.243714	0.418928	0	0.478176	1	chrX	intersection
split_1	CD4_T_cell_Naive	0.73913	0.684211	1	0.612589	0.577153	0.79038	0.625	0.6	0.775	0.634146	0.619048	0.742857	0.429752	0.398167	0.351866	0.639196	5	SLE	intersection
split_1	CD4_T_cell_Treg	0.695652	0.7	0.807692	0.689614	0.575569	0.798954	0.678846	0.565385	0.786827	0.67408	0.600065	0.766809	0.366142	0.372298	0.138287	0.604792	1	chrX	intersection
split_1	CD4_T_cell_Treg	0.826087	0.909091	0.769231	0.695652	0.734161	0.913373	0.707692	0.738462	0.917308	0.709699	0.731957	0.916388	0.654135	0.415385	0.477113	0.828268	9	SLE	intersection
split_1	CD8_positive,_alpha_beta_T_cell	0.76087	0.758621	0.846154	0.510887	0.649462	0.866977	0.509615	0.640385	0.855769	0.569995	0.646536	0.831572	0.504892	0.0223495	0.285191	0.734472	2	chrX	intersection
split_1	CD8_positive,_alpha_beta_T_cell	0.826087	0.821429	0.884615	0.868548	0.737096	0.912365	0.861538	0.728846	0.905769	0.834687	0.714465	0.880256	0.642023	0.734465	0.469181	0.824319	8	SLE	intersection
split_1	CD8_T_cell_Cytotoxic_GZMH_	0.630435	0.609756	0.961538	0.610248	0.443679	0.677617	0.611538	0.505769	0.675	0.626474	0.568068	0.666667	0.176842	0.291756	0.0280484	0.451787	1	chrX	intersection
split_1	CD8_T_cell_Cytotoxic_GZMH_	0.76087	0.941176	0.615385	0.7301	0.652281	0.848186	0.769231	0.694135	0.865385	0.799331	0.713907	0.882943	0.537477	0.580119	0.421182	0.735738	7	SLE	intersection
split_1	CD8_T_cell_Cytotoxic_GZMK_	0.847826	0.88	0.846154	0.740119	0.760078	0.934562	0.746154	0.759615	0.930769	0.740347	0.7457	0.916388	0.692161	0.488564	0.516752	0.867396	5	SLE	intersection
split_1	CD8_T_cell_MAIT	0.711111	0.6875	0.88	0.683128	0.584637	0.812261	0.675	0.585	0.8	0.662835	0.602394	0.758463	0.393782	0.363324	0.219265	0.643602	5	chrX	intersection
split_1	CD8_T_cell_MAIT	0.844444	0.846154	0.88	0.889219	0.755519	0.933132	0.895	0.75475	0.93	0.890707	0.727025	0.908406	0.683417	0.785302	0.507872	0.865207	5	SLE	intersection
split_1	CD8_T_cell_Naive	0.73913	0.888889	0.615385	0.740124	0.629036	0.848186	0.740385	0.663462	0.859615	0.7307	0.679673	0.863036	0.492647	0.477113	0.343792	0.715798	4	SLE	intersection
split_1	Classical_monocyte	0.73913	0.71875	0.884615	0.697216	0.622253	0.824731	0.686538	0.617212	0.817308	0.676445	0.630388	0.791866	0.450199	0.43358	0.277629	0.677365	1	chrX	intersection
split_1	Classical_monocyte	0.826087	0.846154	0.846154	0.757697	0.733954	0.913043	0.748077	0.726731	0.911538	0.728866	0.714465	0.896333	0.646154	0.509559	0.464874	0.824319	10	SLE	intersection
split_1	Conventional_DC	0.586957	0.64	0.615385	0.674693	0.467909	0.713642	0.671154	0.463462	0.707692	0.672375	0.548196	0.700897	0.164436	0.340674	-0.0742278	0.418718	1	chrX	intersection
split_1	Conventional_DC	0.869565	0.884615	0.884615	0.845807	0.782524	0.935061	0.836538	0.77875	0.942308	0.807404	0.760915	0.946295	0.734615	0.691262	0.557688	0.877058	8	SLE	intersection
split_1	Lymphocyte	0.565217	0.65	0.5	0.631308	0.442227	0.675306	0.638462	0.455769	0.688462	0.651218	0.545151	0.693144	0.144981	0.275601	-0.0877058	0.389324	1	chrX	intersection
split_1	Lymphocyte	0.826087	0.95	0.730769	0.826749	0.729525	0.913373	0.828846	0.75	0.917308	0.815426	0.763434	0.916388	0.657993	0.652691	0.516542	0.828268	8	SLE	intersection
split_1	natural_killer_cell	0.652174	0.638889	0.884615	0.522141	0.496752	0.729606	0.515385	0.509615	0.717308	0.57292	0.569995	0.701035	0.24898	0.0338758	0.0223495	0.520841	8	chrX	intersection
split_1	natural_killer_cell	0.847826	0.88	0.846154	0.848186	0.757697	0.913375	0.859615	0.748077	0.923077	0.863036	0.736901	0.916388	0.692161	0.715798	0.509559	0.839719	9	SLE	intersection
split_1	NK_cell_Bright	0.630435	0.628571	0.846154	0.522141	0.480598	0.7096	0.515385	0.492212	0.698077	0.57292	0.561419	0.687453	0.206897	0.0338758	-0.0217104	0.451787	2	chrX	intersection
split_1	NK_cell_Bright	0.826087	0.909091	0.769231	0.913375	0.73913	0.913375	0.917308	0.746154	0.917308	0.912974	0.740347	0.916388	0.654135	0.828268	0.488564	0.828268	6	SLE	intersection
split_1	NK_cell_Dim	0.76087	0.941176	0.615385	0.71377	0.659557	0.848186	0.738462	0.7	0.865385	0.74818	0.715942	0.882943	0.537477	0.489809	0.422995	0.735738	2	chrX	intersection
split_1	NK_cell_Dim	0.847826	0.851852	0.884615	0.890936	0.754277	0.934562	0.886538	0.745962	0.930769	0.863991	0.728866	0.912974	0.688588	0.778333	0.509559	0.867472	8	SLE	intersection
split_1	Non_classical_monocyte	0.847826	0.88	0.846154	0.891561	0.76006	0.934562	0.903846	0.753846	0.930769	0.916388	0.743269	0.929632	0.692161	0.803837	0.511144	0.867472	1	chrX	intersection
split_1	Non_classical_monocyte	0.891304	0.862069	0.961538	0.888308	0.801752	0.956522	0.875	0.792308	0.955769	0.83871	0.764706	0.946295	0.774951	0.793116	0.618233	0.914174	4	SLE	intersection
split_1	Plasmablast	0.621622	0.636364	0.7	0.594941	0.470747	0.743637	0.601471	0.472059	0.739926	0.597153	0.527189	0.706607	0.231454	0.235727	-0.0594913	0.508885	1	chrX	intersection
split_1	Plasmablast	0.72973	0.75	0.75	0.783784	0.595159	0.838075	0.782353	0.598529	0.841176	0.748108	0.599126	0.819219	0.455882	0.564706	0.197059	0.680355	7	SLE	intersection
split_1	Plasmacytoid_DC	0.717391	0.69697	0.884615	0.757697	0.592608	0.801752	0.748077	0.584615	0.792308	0.728866	0.611204	0.766809	0.400802	0.509559	0.182323	0.619282	6	chrX	intersection
split_1	Plasmacytoid_DC	0.717391	0.782609	0.692308	0.740124	0.610178	0.806161	0.740385	0.613462	0.821154	0.7307	0.632487	0.815426	0.434783	0.477113	0.231502	0.646675	7	SLE	intersection
split_1	Progenitor_cell	0.636364	0.615385	0.96	0.570076	0.460963	0.671	0.585263	0.506316	0.664211	0.613497	0.571299	0.662727	0.187067	0.266147	0.0300376	0.455803	1	chrX	intersection
split_1	Progenitor_cell	0.568182	0.65	0.52	0.587521	0.433847	0.703568	0.608421	0.449474	0.702105	0.634278	0.545889	0.701253	0.146939	0.220589	-0.104053	0.4021	4	SLE	intersection
split_1	B_cell_Atypical	0.727273	0.8	0.666667	0.727273	0.612638	0.840498	0.733333	0.616667	0.841667	0.715152	0.620391	0.828072	0.459016	0.466667	0.242419	0.681208	7	chrX	intersection
split_1	B_cell_Atypical	0.727273	0.928571	0.541667	0.692489	0.604538	0.817053	0.725	0.658333	0.833333	0.734266	0.665345	0.848485	0.472	0.491112	0.354044	0.690066	5	SLE	intersection
split_1	B_cell_Memory	0.717391	0.76	0.730769	0.669587	0.608696	0.826087	0.659615	0.605577	0.823077	0.660939	0.626613	0.813346	0.428298	0.327856	0.213747	0.646154	2	chrX	intersection
split_1	B_cell_Memory	0.826087	0.8	0.923077	0.868548	0.723913	0.911318	0.861538	0.711538	0.9	0.834687	0.695062	0.879094	0.637795	0.734465	0.468239	0.823139	8	SLE	intersection
split_1	B_cell_Naive	0.673913	0.761905	0.615385	0.696805	0.561924	0.783432	0.701923	0.575	0.796154	0.700897	0.607609	0.796577	0.35514	0.400775	0.15	0.592308	2	chrX	intersection
split_1	B_cell_Naive	0.891304	0.956522	0.846154	0.913373	0.805184	0.956687	0.923077	0.821154	0.961538	0.93311	0.815426	0.966555	0.782609	0.839719	0.646675	0.916057	7	SLE	intersection
split_1	B_cell	0.711111	0.875	0.56	0.777119	0.592785	0.800594	0.79	0.63	0.82	0.786199	0.642222	0.837661	0.440191	0.583512	0.274081	0.664364	1	chrX	intersection
split_1	B_cell	0.755556	0.85	0.68	0.798615	0.64339	0.866271	0.815	0.655	0.87	0.82	0.657076	0.859027	0.517073	0.63901	0.311877	0.7356	6	SLE	intersection
split_1	CD4_positive,_alpha_beta_T_cell	0.782609	0.785714	0.846154	0.845807	0.674693	0.869565	0.836538	0.671154	0.867308	0.807404	0.668687	0.847762	0.552529	0.691262	0.350316	0.740485	2	chrX	intersection
split_1	CD4_positive,_alpha_beta_T_cell	0.826087	0.821429	0.884615	0.689614	0.733954	0.913043	0.678846	0.723077	0.911538	0.67408	0.707469	0.895549	0.642023	0.372298	0.464901	0.824517	6	SLE	intersection
split_1	CD4_T_cell_Effector_Memory	0.695652	0.7	0.807692	0.693279	0.575569	0.783784	0.684615	0.570865	0.780769	0.679885	0.603443	0.758118	0.366142	0.375046	0.145759	0.578633	2	chrX	intersection
split_1	CD4_T_cell_Effector_Memory	0.891304	0.83871	1	0.864803	0.815942	0.956183	0.85	0.8	0.95	0.8125	0.764706	0.928571	0.772277	0.754155	0.677365	0.914174	5	SLE	intersection
split_1	CD4_T_cell_Naive	0.673913	0.761905	0.615385	0.693347	0.561674	0.783432	0.713462	0.567308	0.790673	0.7199	0.603527	0.787157	0.35514	0.433647	0.137409	0.592308	1	chrX	intersection
split_1	CD4_T_cell_Naive	0.826087	0.875	0.807692	0.869565	0.718067	0.913373	0.867308	0.726731	0.917308	0.847762	0.7199	0.912974	0.65019	0.734615	0.45168	0.828268	5	SLE	intersection
split_1	CD4_T_cell_Treg	0.652174	0.638889	0.884615	0.54468	0.503901	0.729606	0.548077	0.515192	0.717308	0.590075	0.572821	0.701035	0.24898	0.120156	0.0338758	0.494608	1	chrX	intersection
split_1	CD4_T_cell_Treg	0.826087	0.95	0.730769	0.824769	0.734161	0.913373	0.846154	0.751923	0.923077	0.866221	0.7644	0.929806	0.657993	0.703211	0.523501	0.839719	9	SLE	intersection
split_1	CD8_positive,_alpha_beta_T_cell	0.847826	0.88	0.846154	0.826087	0.76006	0.934562	0.840385	0.753846	0.930769	0.846405	0.740347	0.916388	0.692161	0.680769	0.512408	0.867396	2	chrX	intersection
split_1	CD8_positive,_alpha_beta_T_cell	0.847826	0.913043	0.807692	0.912365	0.761435	0.934939	0.905769	0.765385	0.936538	0.880256	0.760802	0.93311	0.695652	0.824319	0.526235	0.868909	8	SLE	intersection
split_1	CD8_T_cell_Cytotoxic_GZMH_	0.695652	0.6875	0.846154	0.743798	0.574666	0.79038	0.730769	0.565385	0.778846	0.708552	0.600065	0.751792	0.358566	0.536388	0.138287	0.600207	1	chrX	intersection
split_1	CD8_T_cell_Cytotoxic_GZMH_	0.847826	0.913043	0.807692	0.891564	0.740124	0.935061	0.892308	0.757692	0.942308	0.879064	0.75565	0.93377	0.695652	0.78087	0.523501	0.877058	7	SLE	intersection
split_1	CD8_T_cell_Cytotoxic_GZMK_	0.804348	0.947368	0.692308	0.826746	0.693347	0.891574	0.834615	0.726827	0.903846	0.829735	0.73561	0.916388	0.617375	0.664141	0.468549	0.803837	5	SLE	intersection
split_1	CD8_T_cell_MAIT	0.666667	0.857143	0.48	0.648989	0.531987	0.755556	0.695	0.585	0.78	0.714444	0.610424	0.786818	0.36019	0.43823	0.195862	0.58439	5	chrX	intersection
split_1	CD8_T_cell_MAIT	0.8	0.9	0.72	0.732543	0.689504	0.888889	0.745	0.71	0.89	0.738947	0.705621	0.893333	0.604878	0.492967	0.427443	0.776899	5	SLE	intersection
split_1	CD8_T_cell_Naive	0.73913	0.791667	0.730769	0.695652	0.629212	0.84819	0.707692	0.626923	0.848365	0.709699	0.643106	0.834687	0.475285	0.415385	0.262658	0.693272	4	SLE	intersection
split_1	Classical_monocyte	0.673913	0.761905	0.615385	0.649539	0.561924	0.783432	0.669231	0.569231	0.796154	0.679673	0.603527	0.787157	0.35514	0.343792	0.137409	0.592308	1	chrX	intersection
split_1	Classical_monocyte	0.869565	0.833333	0.961538	0.79038	0.778114	0.934562	0.775	0.767019	0.930769	0.742857	0.742559	0.912053	0.728346	0.639196	0.563545	0.872966	10	SLE	intersection
split_1	Conventional_DC	0.652174	0.619048	1	0.539382	0.45537	0.677617	0.575	0.525	0.675	0.604651	0.577778	0.666667	0.220339	0.301161	0.169967	0.483046	1	chrX	intersection
split_1	Conventional_DC	0.869565	0.954545	0.807692	0.783437	0.782609	0.935061	0.784615	0.796154	0.942308	0.77146	0.79699	0.949833	0.740602	0.564902	0.609824	0.877058	8	SLE	intersection
split_1	Lymphocyte	0.543478	0.666667	0.384615	0.640134	0.403933	0.649539	0.680769	0.455769	0.680769	0.699952	0.546563	0.699952	0.126582	0.389509	-0.0877058	0.389509	1	chrX	intersection
split_1	Lymphocyte	0.847826	1	0.730769	0.801841	0.75458	0.913373	0.826923	0.788462	0.923077	0.849498	0.816054	0.93311	0.702403	0.671512	0.610089	0.839719	8	SLE	intersection
split_1	natural_killer_cell	0.695652	0.666667	0.923077	0.457625	0.544846	0.79038	0.492308	0.561538	0.775	0.561465	0.597324	0.742857	0.342857	-0.0245026	0.176039	0.606022	8	chrX	intersection
split_1	natural_killer_cell	0.826087	0.95	0.730769	0.734161	0.734161	0.913373	0.763462	0.757404	0.917308	0.779996	0.763434	0.916388	0.657993	0.548439	0.523501	0.828268	9	SLE	intersection
split_1	NK_cell_Bright	0.608696	0.681818	0.576923	0.674693	0.495533	0.73913	0.671154	0.494231	0.740385	0.672375	0.562408	0.7307	0.221805	0.340674	-0.0114834	0.477113	2	chrX	intersection
split_1	NK_cell_Bright	0.826087	1	0.692308	0.778468	0.7301	0.913373	0.807692	0.769231	0.923077	0.832776	0.799331	0.93311	0.661765	0.640513	0.580119	0.839719	6	SLE	intersection
split_1	NK_cell_Dim	0.673913	0.866667	0.5	0.633189	0.541487	0.780962	0.686538	0.597788	0.801923	0.713907	0.629181	0.81345	0.37613	0.421182	0.217254	0.613356	2	chrX	intersection
split_1	NK_cell_Dim	0.782609	0.863636	0.730769	0.826749	0.674684	0.870062	0.828846	0.684519	0.878846	0.815426	0.686256	0.879675	0.567669	0.652691	0.379264	0.75193	8	SLE	intersection
split_1	Non_classical_monocyte	0.76087	0.941176	0.615385	0.734161	0.652281	0.847322	0.763462	0.699712	0.865385	0.779996	0.715942	0.879838	0.537477	0.548439	0.422995	0.735738	1	chrX	intersection
split_1	Non_classical_monocyte	0.869565	0.857143	0.923077	0.845807	0.782609	0.934945	0.836538	0.778846	0.936827	0.807404	0.750177	0.929632	0.731518	0.691262	0.564834	0.87317	4	SLE	intersection
split_1	Plasmablast	0.513514	0.75	0.15	0.514207	0.317274	0.553064	0.595588	0.466176	0.625	0.613739	0.534459	0.655405	0.0851648	0.258474	-0.123506	0.364434	1	chrX	intersection
split_1	Plasmablast	0.702703	0.846154	0.55	0.715397	0.567257	0.809425	0.75	0.611765	0.825	0.77027	0.615233	0.83826	0.419401	0.561084	0.24372	0.67854	7	SLE	intersection
split_1	Plasmacytoid_DC	0.673913	0.657143	0.884615	0.613162	0.527817	0.757697	0.603846	0.534615	0.748077	0.622682	0.582923	0.722222	0.300203	0.228662	0.0781575	0.556445	6	chrX	intersection
split_1	Plasmacytoid_DC	0.826087	0.821429	0.884615	0.716434	0.729606	0.912365	0.709615	0.717308	0.905769	0.700235	0.707469	0.880256	0.642023	0.422081	0.464372	0.824319	7	SLE	intersection
split_1	Progenitor_cell	0.613636	0.611111	0.88	0.701299	0.462084	0.681234	0.690526	0.478947	0.670526	0.681013	0.558081	0.667807	0.153846	0.467925	-0.0540738	0.421776	1	chrX	intersection
split_1	Progenitor_cell	0.590909	0.888889	0.32	0.50782	0.434288	0.669761	0.62	0.547368	0.72	0.671818	0.597403	0.758182	0.24283	0.34641	0.128297	0.503322	4	SLE	intersection
split_1	B_cell_Atypical	0.613636	0.888889	0.333333	0.479624	0.443228	0.68591	0.579167	0.554167	0.725208	0.605429	0.580628	0.734848	0.266667	0.229734	0.14748	0.495074	7	chrX	intersection
split_1	B_cell_Atypical	0.75	0.882353	0.625	0.739799	0.637565	0.841156	0.770833	0.6625	0.854167	0.791667	0.664216	0.848485	0.510121	0.591153	0.349395	0.724356	5	SLE	intersection
split_1	B_cell_Memory	0.673913	0.689655	0.769231	0.689614	0.557469	0.780914	0.678846	0.551923	0.773077	0.67408	0.59263	0.751792	0.324853	0.372298	0.105482	0.557985	2	chrX	intersection
split_1	B_cell_Memory	0.847826	0.851852	0.884615	0.869565	0.76006	0.934562	0.884615	0.753846	0.930769	0.899666	0.735786	0.912974	0.688588	0.769231	0.511144	0.868909	8	SLE	intersection
split_1	B_cell_Naive	0.652174	0.708333	0.653846	0.631308	0.523561	0.761441	0.638462	0.525	0.765385	0.651218	0.578063	0.751792	0.30038	0.275601	0.0496198	0.526235	2	chrX	intersection
split_1	B_cell_Naive	0.891304	1	0.807692	0.824769	0.824769	0.956687	0.846154	0.846154	0.961538	0.866221	0.866221	0.966555	0.785047	0.703211	0.703211	0.916057	7	SLE	intersection
split_1	B_cell	0.755556	0.9375	0.6	0.609687	0.648989	0.866271	0.645	0.685	0.875	0.656825	0.70015	0.875556	0.526316	0.311271	0.407713	0.747018	1	chrX	intersection
split_1	B_cell	0.777778	0.857143	0.72	0.778439	0.680839	0.868138	0.78	0.685	0.88025	0.761159	0.682432	0.873333	0.558824	0.55667	0.383768	0.765104	6	SLE	intersection
split_1	CD4_positive,_alpha_beta_T_cell	0.782609	0.9	0.692308	0.780962	0.675306	0.870062	0.801923	0.7	0.884615	0.813174	0.704308	0.896321	0.572491	0.613356	0.400775	0.769231	2	chrX	intersection
split_1	CD4_positive,_alpha_beta_T_cell	0.804348	0.814815	0.846154	0.798954	0.695652	0.891561	0.786538	0.690385	0.892308	0.758118	0.686198	0.879064	0.599613	0.606022	0.380769	0.782114	6	SLE	intersection
split_1	CD4_T_cell_Effector_Memory	0.76087	0.857143	0.692308	0.696805	0.652174	0.869565	0.701923	0.669231	0.873077	0.700897	0.67893	0.863036	0.527103	0.400775	0.343792	0.74048	2	chrX	intersection
split_1	CD4_T_cell_Effector_Memory	0.869565	0.916667	0.846154	0.80481	0.782609	0.956183	0.815385	0.784615	0.95	0.813346	0.77146	0.949833	0.737643	0.627758	0.564902	0.911538	5	SLE	intersection
split_1	CD4_T_cell_Naive	0.695652	0.7	0.807692	0.653499	0.575035	0.795203	0.651923	0.565385	0.780962	0.658793	0.600065	0.758118	0.366142	0.301536	0.138287	0.600218	1	chrX	intersection
split_1	CD4_T_cell_Naive	0.804348	0.947368	0.692308	0.891769	0.709958	0.891561	0.898077	0.738462	0.903846	0.896321	0.74818	0.916388	0.617375	0.789352	0.489809	0.803837	5	SLE	intersection
split_1	CD4_T_cell_Treg	0.695652	0.7	0.807692	0.737096	0.581324	0.783784	0.728846	0.571154	0.780769	0.714465	0.603621	0.758118	0.366142	0.464901	0.146153	0.578633	1	chrX	intersection
split_1	CD4_T_cell_Treg	0.847826	0.952381	0.769231	0.848186	0.757805	0.934939	0.859615	0.771154	0.936538	0.863036	0.779996	0.93311	0.699065	0.715798	0.557153	0.868909	9	SLE	intersection
split_1	CD8_positive,_alpha_beta_T_cell	0.73913	0.684211	1	0.707686	0.612589	0.79038	0.7	0.625	0.775	0.684211	0.634146	0.742857	0.429752	0.523148	0.398167	0.639196	2	chrX	intersection
split_1	CD8_positive,_alpha_beta_T_cell	0.826087	0.821429	0.884615	0.778295	0.729606	0.912365	0.767308	0.717308	0.905769	0.743423	0.701035	0.895549	0.642023	0.556445	0.464372	0.824319	8	SLE	intersection
split_1	CD8_T_cell_Cytotoxic_GZMH_	0.608696	0.653846	0.653846	0.501196	0.498307	0.729606	0.494231	0.488462	0.723269	0.562408	0.559643	0.714465	0.203846	-0.0114834	-0.0232338	0.464398	1	chrX	intersection
split_1	CD8_T_cell_Cytotoxic_GZMH_	0.826087	0.8	0.923077	0.804816	0.729606	0.912365	0.803846	0.717308	0.905769	0.787157	0.701035	0.880256	0.637795	0.604792	0.468072	0.824319	7	SLE	intersection
split_1	CD8_T_cell_Cytotoxic_GZMK_	0.826087	0.846154	0.846154	0.847311	0.737096	0.913375	0.842308	0.728846	0.917308	0.818779	0.714465	0.912053	0.646154	0.68927	0.464901	0.828268	5	SLE	intersection
split_1	CD8_T_cell_MAIT	0.711111	0.6875	0.88	0.682369	0.584637	0.81245	0.68	0.58	0.80025	0.662222	0.59914	0.765448	0.393782	0.447214	0.176419	0.643602	5	chrX	intersection
split_1	CD8_T_cell_MAIT	0.844444	0.875	0.84	0.844906	0.754818	0.911376	0.85	0.75	0.91525	0.838384	0.728254	0.908406	0.686567	0.695837	0.503027	0.830765	5	SLE	intersection
split_1	CD8_T_cell_Naive	0.73913	0.888889	0.615385	0.718059	0.625699	0.826746	0.726923	0.661346	0.846154	0.724956	0.671823	0.849498	0.492647	0.45168	0.326923	0.701725	4	SLE	intersection
split_1	Classical_monocyte	0.73913	0.71875	0.884615	0.798954	0.622253	0.824731	0.786538	0.615385	0.817308	0.758118	0.630388	0.787879	0.450199	0.606022	0.243955	0.65885	1	chrX	intersection
split_1	Classical_monocyte	0.782609	0.863636	0.730769	0.84819	0.674591	0.871106	0.848077	0.682692	0.884712	0.831572	0.686256	0.882943	0.567669	0.692831	0.363641	0.769686	10	SLE	intersection
split_1	Conventional_DC	0.608696	0.611111	0.846154	0.504277	0.457625	0.68454	0.496154	0.473077	0.673077	0.563336	0.552341	0.668687	0.155102	-0.00828742	-0.0792594	0.407452	1	chrX	intersection
split_1	Conventional_DC	0.847826	0.913043	0.807692	0.913375	0.760078	0.934939	0.917308	0.765385	0.936538	0.912974	0.755853	0.93311	0.695652	0.828268	0.526235	0.868909	8	SLE	intersection
split_1	Lymphocyte	0.565217	0.8	0.307692	0.469354	0.402174	0.640134	0.565385	0.507692	0.692308	0.60786	0.569231	0.730383	0.190141	0.171029	0.0243629	0.453089	1	chrX	intersection
split_1	Lymphocyte	0.782609	0.944444	0.653846	0.801841	0.685117	0.870059	0.826923	0.719231	0.884615	0.849498	0.732023	0.899666	0.577206	0.671512	0.456365	0.769231	8	SLE	intersection
split_1	natural_killer_cell	0.608696	0.6	0.923077	0.527817	0.442759	0.650633	0.528846	0.478846	0.65	0.579849	0.555052	0.65	0.133891	0.0693375	-0.0792594	0.407452	8	chrX	intersection
split_1	natural_killer_cell	0.869565	0.954545	0.807692	0.848186	0.780962	0.935061	0.859615	0.797981	0.942308	0.863036	0.79699	0.949833	0.740602	0.715798	0.600401	0.877058	9	SLE	intersection
split_1	NK_cell_Bright	0.630435	0.645161	0.769231	0.697216	0.496628	0.733954	0.686538	0.494038	0.723077	0.676445	0.562315	0.707559	0.225743	0.43358	-0.0119947	0.477629	2	chrX	intersection
split_1	NK_cell_Bright	0.826087	0.909091	0.769231	0.783432	0.737154	0.913373	0.790385	0.740385	0.917308	0.783293	0.740347	0.916388	0.654135	0.576353	0.488564	0.828268	6	SLE	intersection
split_1	NK_cell_Dim	0.717391	0.882353	0.576923	0.709958	0.601242	0.824769	0.744231	0.636538	0.840385	0.763434	0.658505	0.849498	0.453382	0.516542	0.294203	0.680769	2	chrX	intersection
split_1	NK_cell_Dim	0.782609	1	0.615385	0.847322	0.679041	0.869565	0.865385	0.730769	0.884615	0.882943	0.765886	0.899666	0.581818	0.735738	0.52105	0.769231	8	SLE	intersection
split_1	Non_classical_monocyte	0.847826	0.88	0.846154	0.913043	0.761435	0.934562	0.911538	0.759615	0.930769	0.895549	0.745819	0.928571	0.692161	0.823077	0.516752	0.867396	1	chrX	intersection
split_1	Non_classical_monocyte	0.869565	0.857143	0.923077	0.933917	0.780914	0.934939	0.925	0.773077	0.936538	0.896552	0.750177	0.928571	0.731518	0.872966	0.563252	0.872966	4	SLE	intersection
split_1	Plasmablast	0.594595	0.592593	0.8	0.45816	0.424597	0.69359	0.467647	0.458824	0.689706	0.525125	0.521011	0.659081	0.157815	-0.0726108	-0.111343	0.437947	1	chrX	intersection
split_1	Plasmablast	0.756757	0.789474	0.75	0.891088	0.637094	0.864865	0.886765	0.636765	0.866176	0.847482	0.624266	0.841607	0.512445	0.785162	0.287115	0.730208	7	SLE	intersection
split_1	Plasmacytoid_DC	0.586957	1	0.269231	0.534557	0.392994	0.652281	0.634615	0.557692	0.711538	0.682274	0.615385	0.749164	0.242634	0.371574	0.231662	0.491689	6	chrX	intersection
split_1	Plasmacytoid_DC	0.804348	0.84	0.807692	0.740119	0.696805	0.891564	0.746154	0.701635	0.892308	0.740347	0.693576	0.879675	0.604207	0.488564	0.400775	0.78087	7	SLE	intersection
split_1	Progenitor_cell	0.5	0.578947	0.44	0.462228	0.368703	0.614635	0.502105	0.390474	0.629474	0.569221	0.525636	0.648283	0.0182556	0.00447774	-0.229416	0.258947	1	chrX	intersection
split_1	Progenitor_cell	0.613636	0.833333	0.4	0.622584	0.47338	0.700406	0.667368	0.548368	0.74	0.69049	0.597403	0.758182	0.272374	0.363411	0.121756	0.503322	4	SLE	intersection
split_1	B_cell_Atypical	0.659091	1	0.375	0.657556	0.496254	0.739799	0.708333	0.604167	0.770833	0.734848	0.640152	0.791667	0.352941	0.495074	0.32686	0.591153	14	chrX	combined
split_1	B_cell_Atypical	0.75	0.933333	0.583333	0.739799	0.637589	0.840498	0.770833	0.675	0.854167	0.791667	0.680848	0.867111	0.514056	0.591153	0.388217	0.724356	18	SLE	combined
split_1	B_cell_Memory	0.73913	0.75	0.807692	0.822636	0.625531	0.847311	0.811538	0.615385	0.842308	0.78194	0.630954	0.815426	0.463035	0.648519	0.237004	0.691262	7	chrX	combined
split_1	B_cell_Memory	0.847826	0.88	0.846154	0.913043	0.761441	0.93395	0.911538	0.759615	0.925288	0.895549	0.745819	0.912974	0.692161	0.823077	0.516752	0.867396	24	SLE	combined
split_1	B_cell_Naive	0.76087	0.777778	0.807692	0.740124	0.644983	0.848204	0.740385	0.634615	0.853942	0.7307	0.643255	0.834687	0.510638	0.477113	0.280224	0.715635	3	chrX	combined
split_1	B_cell_Naive	0.869565	0.916667	0.846154	0.913043	0.782609	0.936117	0.911538	0.784615	0.942692	0.895549	0.76732	0.949833	0.737643	0.823077	0.564902	0.878782	26	SLE	combined
split_1	B_cell	0.711111	0.875	0.56	0.730159	0.592646	0.820106	0.75	0.63	0.83	0.751634	0.642162	0.822994	0.440191	0.51245	0.273861	0.657725	6	chrX	combined
split_1	B_cell	0.755556	0.85	0.68	0.866667	0.645147	0.844906	0.865	0.66	0.86	0.841067	0.664314	0.855845	0.517073	0.73	0.327968	0.73	15	SLE	combined
split_1	CD4_positive,_alpha_beta_T_cell	0.891304	0.92	0.884615	0.934939	0.805165	0.956687	0.936538	0.809615	0.961538	0.929632	0.797164	0.966555	0.780115	0.868909	0.613941	0.916057	2	chrX	combined
split_1	CD4_positive,_alpha_beta_T_cell	0.847826	0.952381	0.769231	0.826087	0.760078	0.934939	0.840385	0.776923	0.936538	0.846405	0.780672	0.93311	0.699065	0.680769	0.557612	0.868909	24	SLE	combined
split_1	CD4_T_cell_Effector_Memory	0.652174	0.647059	0.846154	0.560934	0.51775	0.737096	0.580769	0.521154	0.728846	0.608043	0.575898	0.708552	0.258065	0.257277	0.0509525	0.509638	2	chrX	combined
split_1	CD4_T_cell_Effector_Memory	0.891304	0.956522	0.846154	0.826749	0.80481	0.956687	0.828846	0.809615	0.961538	0.815426	0.813174	0.966555	0.782609	0.652691	0.627758	0.916057	20	SLE	combined
split_1	CD4_T_cell_Naive	0.673913	0.789474	0.576923	0.625699	0.556936	0.782609	0.65	0.580769	0.796154	0.664962	0.61204	0.797107	0.362292	0.308106	0.164083	0.604792	5	chrX	combined
split_1	CD4_T_cell_Naive	0.847826	0.88	0.846154	0.847311	0.76006	0.934939	0.842308	0.753846	0.936538	0.818779	0.743269	0.929632	0.692161	0.68927	0.511144	0.868909	15	SLE	combined
split_1	CD4_T_cell_Treg	0.630435	0.609756	0.961538	0.628019	0.45537	0.659493	0.630769	0.505769	0.656058	0.63811	0.568068	0.654557	0.176842	0.360957	0.0280484	0.441588	5	chrX	combined
split_1	CD4_T_cell_Treg	0.847826	0.913043	0.807692	0.782609	0.760078	0.913375	0.796154	0.765385	0.923077	0.79699	0.764352	0.93311	0.695652	0.592308	0.539719	0.839719	20	SLE	combined
split_1	CD8_positive,_alpha_beta_T_cell	0.782609	0.785714	0.846154	0.819737	0.672809	0.870974	0.805769	0.665385	0.875192	0.772941	0.666419	0.850652	0.552529	0.65885	0.333018	0.755364	7	chrX	combined
split_1	CD8_positive,_alpha_beta_T_cell	0.826087	0.909091	0.769231	0.718598	0.718598	0.913373	0.721154	0.734519	0.917308	0.715719	0.73561	0.916388	0.654135	0.438529	0.469231	0.828268	23	SLE	combined
split_1	CD8_T_cell_Cytotoxic_GZMH_	0.73913	0.791667	0.730769	0.695652	0.631308	0.826749	0.707692	0.62875	0.840385	0.709699	0.643697	0.829735	0.475285	0.415385	0.262658	0.680769	4	chrX	combined
split_1	CD8_T_cell_Cytotoxic_GZMH_	0.804348	1	0.653846	0.824769	0.704949	0.891561	0.846154	0.75	0.903846	0.866221	0.782609	0.916388	0.621572	0.703211	0.550482	0.803837	28	SLE	combined
split_1	CD8_T_cell_Cytotoxic_GZMK_	0.717391	0.76	0.730769	0.740119	0.605645	0.82612	0.746154	0.601923	0.828846	0.740347	0.623167	0.813346	0.428298	0.488564	0.203846	0.652691	3	chrX	combined
split_1	CD8_T_cell_Cytotoxic_GZMK_	0.826087	0.909091	0.769231	0.824769	0.737154	0.91306	0.846154	0.746154	0.911827	0.866221	0.740347	0.916388	0.654135	0.703211	0.488564	0.824517	23	SLE	combined
split_1	CD8_T_cell_MAIT	0.711111	0.6875	0.88	0.711111	0.586134	0.81606	0.705	0.59	0.805	0.680508	0.604444	0.76735	0.393782	0.490044	0.219265	0.643602	17	chrX	combined
split_1	CD8_T_cell_MAIT	0.822222	0.947368	0.72	0.86693	0.721496	0.911287	0.875	0.74	0.915	0.873016	0.74928	0.911111	0.650485	0.747018	0.504473	0.825064	21	SLE	combined
split_1	CD8_T_cell_Naive	0.630435	0.695652	0.615385	0.674684	0.502089	0.740119	0.682692	0.507692	0.746154	0.686256	0.56904	0.740347	0.26087	0.363641	0.0156269	0.488564	2	chrX	combined
split_1	CD8_T_cell_Naive	0.73913	0.733333	0.846154	0.733954	0.625531	0.827448	0.723077	0.615385	0.828846	0.707469	0.630954	0.802933	0.456693	0.464372	0.237004	0.67796	12	SLE	combined
split_1	Classical_monocyte	0.782609	0.785714	0.846154	0.761441	0.674693	0.870974	0.759615	0.667308	0.875	0.745819	0.666419	0.850652	0.552529	0.516752	0.340674	0.755364	4	chrX	combined
split_1	Classical_monocyte	0.847826	0.806452	0.961538	0.889862	0.749693	0.933917	0.880769	0.736538	0.925	0.850652	0.714807	0.896552	0.681188	0.782114	0.536388	0.867396	23	SLE	combined
split_1	Conventional_DC	0.630435	0.621622	0.884615	0.56153	0.479227	0.704183	0.567308	0.495962	0.692308	0.600642	0.563243	0.681768	0.197125	0.17606	-0.00895857	0.468239	10	chrX	combined
split_1	Conventional_DC	0.782609	0.863636	0.730769	0.757805	0.674693	0.891561	0.782692	0.684519	0.892308	0.796577	0.686256	0.882943	0.567669	0.58066	0.374908	0.78087	17	SLE	combined
split_1	Lymphocyte	0.76087	0.894737	0.653846	0.716456	0.649339	0.848476	0.732692	0.669231	0.865385	0.73561	0.684075	0.866221	0.532348	0.468549	0.355696	0.735738	8	chrX	combined
split_1	Lymphocyte	0.782609	0.944444	0.653846	0.870059	0.679041	0.870059	0.878846	0.713462	0.884615	0.879675	0.730684	0.899666	0.577206	0.75193	0.456201	0.769231	29	SLE	combined
split_1	natural_killer_cell	0.608696	0.833333	0.384615	0.685117	0.453133	0.704949	0.725	0.546154	0.744231	0.746894	0.592093	0.763482	0.263345	0.484814	0.103593	0.516767	21	chrX	combined
split_1	natural_killer_cell	0.826087	0.821429	0.884615	0.845807	0.718598	0.913043	0.836538	0.715385	0.911538	0.807404	0.701035	0.896321	0.642023	0.691262	0.46308	0.824319	38	SLE	combined
split_1	NK_cell_Bright	0.76087	0.857143	0.692308	0.716456	0.669374	0.869565	0.732692	0.676923	0.867308	0.73561	0.686198	0.863036	0.527103	0.468549	0.363641	0.735738	8	chrX	combined
split_1	NK_cell_Bright	0.826087	0.95	0.730769	0.826087	0.734161	0.913373	0.840385	0.757692	0.923077	0.846405	0.7644	0.93311	0.657993	0.680769	0.523501	0.839719	25	SLE	combined
split_1	NK_cell_Dim	0.673913	1	0.423077	0.7301	0.534557	0.75458	0.769231	0.634615	0.788462	0.799331	0.682274	0.816054	0.389381	0.580119	0.371574	0.610089	2	chrX	combined
split_1	NK_cell_Dim	0.847826	0.827586	0.923077	0.729606	0.749693	0.933917	0.717308	0.736538	0.925	0.701035	0.714807	0.896552	0.684932	0.468239	0.512408	0.867396	26	SLE	combined
split_1	Non_classical_monocyte	0.782609	1	0.615385	0.801841	0.679041	0.869565	0.826923	0.730769	0.884615	0.849498	0.765886	0.899666	0.581818	0.671512	0.52105	0.769231	4	chrX	combined
split_1	Non_classical_monocyte	0.913043	0.923077	0.923077	0.978313	0.845807	0.978313	0.980769	0.836538	0.980769	0.983278	0.818611	0.983278	0.823077	0.956949	0.68927	0.956949	26	SLE	combined
split_1	Plasmablast	0.594595	0.571429	1	0.437151	0.379327	0.582987	0.529412	0.5	0.617647	0.555556	0.540541	0.606061	0.125984	0.180775	0	0.377627	3	chrX	combined
split_1	Plasmablast	0.756757	0.823529	0.7	0.701824	0.622175	0.864865	0.698529	0.635147	0.870588	0.670849	0.627413	0.861049	0.516691	0.399415	0.28726	0.741176	95	SLE	combined
split_1	Plasmacytoid_DC	0.695652	0.666667	0.923077	0.743798	0.557469	0.770165	0.730769	0.561538	0.756058	0.708552	0.597324	0.729212	0.342857	0.536388	0.176039	0.600925	15	chrX	combined
split_1	Plasmacytoid_DC	0.76087	0.941176	0.615385	0.8037	0.649339	0.848186	0.821154	0.692308	0.865385	0.829783	0.713907	0.882943	0.537477	0.646675	0.421182	0.735738	24	SLE	combined
split_1	Progenitor_cell	0.477273	0.625	0.2	0.34026	0.300587	0.541599	0.513684	0.428105	0.62	0.576061	0.545432	0.654727	0.0380228	0.0537829	-0.188399	0.291999	4	chrX	combined
split_1	Progenitor_cell	0.75	0.888889	0.64	0.841652	0.633352	0.841652	0.847368	0.661053	0.86	0.840909	0.679455	0.861818	0.512097	0.688247	0.336589	0.725365	15	SLE	combined
split_1	B_cell_Atypical	0.75	0.69697	0.958333	0.883607	0.613347	0.83705	0.875	0.629167	0.829167	0.827586	0.618448	0.782785	0.47619	0.787839	0.351419	0.709384	14	chrX	combined
split_1	B_cell_Atypical	0.818182	1	0.666667	0.839175	0.713287	0.909091	0.854167	0.75	0.916667	0.867424	0.772727	0.924242	0.645161	0.724356	0.559017	0.833333	18	SLE	combined
split_1	B_cell_Memory	0.695652	0.7	0.807692	0.645273	0.575569	0.790621	0.634615	0.565385	0.780769	0.643255	0.600065	0.758118	0.366142	0.280224	0.138287	0.600207	7	chrX	combined
split_1	B_cell_Memory	0.847826	0.851852	0.884615	0.912365	0.757697	0.934562	0.905769	0.748077	0.930769	0.880256	0.730608	0.928571	0.688588	0.824319	0.511144	0.868909	24	SLE	combined
split_1	B_cell_Naive	0.652174	0.708333	0.653846	0.716434	0.541707	0.757815	0.709615	0.532692	0.753846	0.700235	0.582064	0.745819	0.30038	0.422081	0.0658292	0.511211	3	chrX	combined
split_1	B_cell_Naive	0.869565	0.884615	0.884615	0.761441	0.780914	0.935061	0.759615	0.773077	0.942308	0.745819	0.755853	0.929632	0.734615	0.516752	0.557692	0.877058	26	SLE	combined
split_1	B_cell	0.622222	0.833333	0.4	0.465464	0.479424	0.706093	0.575	0.55	0.74	0.611111	0.586802	0.767111	0.28169	0.219265	0.117755	0.537587	6	chrX	combined
split_1	B_cell	0.8	0.833333	0.8	0.734127	0.689799	0.88911	0.735	0.69	0.89	0.719034	0.680386	0.875556	0.597015	0.467205	0.37774	0.778924	15	SLE	combined
split_1	CD4_positive,_alpha_beta_T_cell	0.782609	0.9	0.692308	0.824769	0.672834	0.870062	0.846154	0.7	0.884615	0.866221	0.707396	0.883573	0.572491	0.703211	0.414654	0.769231	2	chrX	combined
split_1	CD4_positive,_alpha_beta_T_cell	0.847826	0.952381	0.769231	0.761441	0.757805	0.934945	0.759615	0.776923	0.936827	0.745819	0.780672	0.93377	0.699065	0.516752	0.557612	0.869317	24	SLE	combined
split_1	CD4_T_cell_Effector_Memory	0.76087	0.741935	0.884615	0.778295	0.640484	0.847311	0.767308	0.634423	0.842308	0.743423	0.642057	0.8125	0.49901	0.556445	0.281973	0.702345	2	chrX	combined
split_1	CD4_T_cell_Effector_Memory	0.847826	0.952381	0.769231	0.824769	0.757805	0.935061	0.846154	0.776923	0.942308	0.866221	0.780672	0.946295	0.699065	0.703211	0.557612	0.877058	20	SLE	combined
split_1	CD4_T_cell_Naive	0.630435	0.909091	0.384615	0.517594	0.483782	0.7301	0.609615	0.576923	0.757692	0.64862	0.616778	0.782609	0.307965	0.286726	0.209471	0.550482	5	chrX	combined
split_1	CD4_T_cell_Naive	0.826087	0.846154	0.846154	0.798954	0.737096	0.913043	0.786538	0.728846	0.911538	0.758118	0.714465	0.896321	0.646154	0.606022	0.464901	0.828268	15	SLE	combined
split_1	CD4_T_cell_Treg	0.673913	0.648649	0.923077	0.658967	0.527817	0.743798	0.655769	0.542308	0.730769	0.65433	0.586914	0.708552	0.291581	0.407452	0.11678	0.536388	5	chrX	combined
split_1	CD4_T_cell_Treg	0.913043	0.958333	0.884615	0.913043	0.847322	0.978313	0.911538	0.847981	0.980769	0.895549	0.831572	0.983278	0.825095	0.823077	0.692831	0.956949	20	SLE	combined
split_1	CD8_positive,_alpha_beta_T_cell	0.695652	0.657895	0.961538	0.754277	0.539382	0.764209	0.742308	0.555769	0.750288	0.721545	0.594083	0.722549	0.334711	0.512475	0.181164	0.600925	7	chrX	combined
split_1	CD8_positive,_alpha_beta_T_cell	0.826087	0.846154	0.846154	0.761441	0.718572	0.913043	0.759615	0.721154	0.911538	0.745819	0.714465	0.896321	0.646154	0.516752	0.451022	0.823139	23	SLE	combined
split_1	CD8_T_cell_Cytotoxic_GZMH_	0.695652	0.6875	0.846154	0.798954	0.575569	0.798954	0.786538	0.573077	0.786538	0.758118	0.604051	0.758118	0.358566	0.606022	0.175655	0.606022	4	chrX	combined
split_1	CD8_T_cell_Cytotoxic_GZMH_	0.847826	0.913043	0.807692	0.869565	0.7578	0.934939	0.867308	0.759519	0.936538	0.847762	0.755853	0.93311	0.695652	0.734615	0.523501	0.868909	28	SLE	combined
split_1	CD8_T_cell_Cytotoxic_GZMK_	0.804348	0.793103	0.884615	0.845807	0.704183	0.889862	0.836538	0.692308	0.880769	0.807404	0.686198	0.862598	0.594912	0.691262	0.418707	0.782114	3	chrX	combined
split_1	CD8_T_cell_Cytotoxic_GZMK_	0.847826	0.88	0.846154	0.870062	0.760078	0.934562	0.873077	0.759615	0.930769	0.862598	0.745819	0.916997	0.692161	0.74048	0.516752	0.867396	23	SLE	combined
split_1	CD8_T_cell_MAIT	0.688889	0.73913	0.68	0.799397	0.574741	0.800594	0.795	0.57475	0.805	0.76735	0.595854	0.789697	0.376238	0.593572	0.148976	0.606373	17	chrX	combined
split_1	CD8_T_cell_MAIT	0.8	0.9	0.72	0.800594	0.705934	0.889219	0.805	0.715	0.895	0.789697	0.712	0.893333	0.604878	0.606373	0.44	0.785302	21	SLE	combined
split_1	CD8_T_cell_Naive	0.608696	0.7	0.538462	0.632013	0.486518	0.718067	0.632692	0.505769	0.732692	0.645485	0.568084	0.732023	0.230483	0.263117	0.0114834	0.468549	2	chrX	combined
split_1	CD8_T_cell_Naive	0.804348	0.814815	0.846154	0.843631	0.704183	0.891574	0.830769	0.698077	0.892596	0.797173	0.693144	0.880256	0.599613	0.699569	0.418707	0.789352	12	SLE	combined
split_1	Classical_monocyte	0.76087	0.8	0.769231	0.478261	0.652174	0.848476	0.486538	0.646154	0.859712	0.558779	0.653203	0.846166	0.516252	-0.0269231	0.292308	0.734465	4	chrX	combined
split_1	Classical_monocyte	0.891304	0.888889	0.923077	0.913043	0.804816	0.956687	0.911538	0.803846	0.961538	0.895549	0.776415	0.962963	0.777563	0.823077	0.606022	0.916057	23	SLE	combined
split_1	Conventional_DC	0.543478	0.592593	0.615385	0.581476	0.423568	0.665156	0.571154	0.413462	0.659615	0.603621	0.527592	0.664944	0.065764	0.146153	-0.180144	0.32697	10	chrX	combined
split_1	Conventional_DC	0.782609	0.863636	0.730769	0.669734	0.674684	0.870062	0.694231	0.688462	0.884615	0.704308	0.693144	0.882943	0.567669	0.398957	0.379486	0.769231	17	SLE	combined
split_1	Lymphocyte	0.565217	0.607143	0.653846	0.54468	0.441539	0.669748	0.548077	0.432692	0.659904	0.590075	0.535009	0.661213	0.105058	0.120156	-0.142354	0.330885	8	chrX	combined
split_1	Lymphocyte	0.782609	0.9	0.692308	0.761435	0.685117	0.870062	0.771154	0.707692	0.884615	0.76732	0.709699	0.896321	0.572491	0.539719	0.415385	0.769231	29	SLE	combined
split_1	natural_killer_cell	0.73913	0.705882	0.923077	0.729606	0.619892	0.819737	0.717308	0.615192	0.805769	0.701035	0.630205	0.773115	0.443548	0.468239	0.277629	0.677365	21	chrX	combined
split_1	natural_killer_cell	0.782609	0.735294	0.961538	0.819737	0.669472	0.866977	0.805769	0.661538	0.855769	0.772941	0.658863	0.823021	0.53629	0.65885	0.38829	0.754155	38	SLE	combined
split_1	NK_cell_Bright	0.695652	0.657895	0.961538	0.628019	0.539382	0.763908	0.630769	0.561538	0.75	0.63811	0.597324	0.722222	0.334711	0.360957	0.181164	0.600925	8	chrX	combined
split_1	NK_cell_Bright	0.847826	0.88	0.846154	0.891564	0.761435	0.934562	0.892308	0.759615	0.930769	0.879064	0.745819	0.916997	0.692161	0.78087	0.516752	0.867396	25	SLE	combined
split_1	NK_cell_Dim	0.717391	0.882353	0.576923	0.640134	0.601242	0.824769	0.680769	0.630769	0.834615	0.699952	0.650502	0.846405	0.453382	0.389509	0.272218	0.671512	2	chrX	combined
split_1	NK_cell_Dim	0.804348	0.793103	0.884615	0.798954	0.693279	0.890936	0.786538	0.684615	0.886538	0.758118	0.679885	0.863991	0.594912	0.606022	0.377761	0.782114	26	SLE	combined
split_1	Non_classical_monocyte	0.782609	0.833333	0.769231	0.695652	0.675306	0.870062	0.690385	0.682692	0.884615	0.686198	0.686198	0.879064	0.562738	0.380769	0.371898	0.769231	4	chrX	combined
split_1	Non_classical_monocyte	0.891304	1	0.807692	0.913373	0.801841	0.956687	0.923077	0.826923	0.961538	0.93311	0.849498	0.966555	0.785047	0.839719	0.671512	0.916057	26	SLE	combined
split_1	Plasmablast	0.567568	0.558824	0.95	0.472272	0.366795	0.582987	0.533824	0.454412	0.617647	0.557909	0.51896	0.606061	0.0721003	0.123506	-0.153659	0.377627	3	chrX	combined
split_1	Plasmablast	0.72973	0.916667	0.55	0.746903	0.601556	0.835692	0.775	0.641176	0.845588	0.793243	0.644324	0.839189	0.474432	0.599679	0.316847	0.695278	95	SLE	combined
split_1	Plasmacytoid_DC	0.73913	0.75	0.807692	0.774671	0.625531	0.84374	0.761538	0.615385	0.836538	0.735786	0.630954	0.807404	0.463035	0.563545	0.237004	0.68927	15	chrX	combined
split_1	Plasmacytoid_DC	0.782609	0.9	0.692308	0.761435	0.685117	0.870062	0.771154	0.705577	0.884615	0.76732	0.709699	0.899666	0.572491	0.539719	0.415385	0.769231	24	SLE	combined
split_1	Progenitor_cell	0.568182	0.607143	0.68	0.56658	0.42971	0.681818	0.556842	0.418947	0.675789	0.598392	0.532727	0.673386	0.103004	0.114531	-0.165434	0.351579	4	chrX	combined
split_1	Progenitor_cell	0.613636	0.785714	0.44	0.54169	0.470085	0.725014	0.562105	0.534737	0.747368	0.602888	0.587273	0.758264	0.26378	0.126357	0.0794719	0.504125	15	SLE	combined
split_1	B_cell_Atypical	0.613636	0.818182	0.375	0.665501	0.461874	0.697588	0.704167	0.5375	0.729167	0.715593	0.568622	0.737689	0.26087	0.456531	0.0909467	0.500298	14	chrX	combined
split_1	B_cell_Atypical	0.795455	1	0.625	0.739799	0.68591	0.88607	0.770833	0.729167	0.895833	0.791667	0.753788	0.905303	0.60241	0.591153	0.527046	0.795822	18	SLE	combined
split_1	B_cell_Memory	0.608696	0.6	0.923077	0.498927	0.443252	0.658687	0.55	0.480673	0.650288	0.590909	0.555883	0.651223	0.133891	0.243086	-0.055333	0.398631	7	chrX	combined
split_1	B_cell_Memory	0.652174	0.65625	0.807692	0.578422	0.512182	0.737096	0.586538	0.507692	0.728846	0.611526	0.56904	0.708552	0.266932	0.238869	0.0156269	0.477629	24	SLE	combined
split_1	B_cell_Naive	0.673913	0.689655	0.769231	0.620246	0.549343	0.782609	0.609615	0.540385	0.778846	0.626713	0.586068	0.758118	0.324853	0.231834	0.0870179	0.557692	3	chrX	combined
split_1	B_cell_Naive	0.847826	0.913043	0.807692	0.804816	0.761441	0.934939	0.803846	0.771154	0.936538	0.787157	0.764233	0.93311	0.695652	0.604792	0.539719	0.868909	26	SLE	combined
split_1	B_cell	0.688889	0.72	0.72	0.598814	0.574741	0.800398	0.61	0.57	0.80025	0.622456	0.593846	0.778074	0.37	0.221332	0.140848	0.60111	6	chrX	combined
split_1	B_cell	0.666667	0.65625	0.84	0.81606	0.53577	0.754818	0.805	0.535	0.75	0.765448	0.57362	0.720404	0.300518	0.654742	0.0751343	0.531872	15	SLE	combined
split_1	CD4_positive,_alpha_beta_T_cell	0.804348	0.869565	0.769231	0.870062	0.716456	0.891769	0.873077	0.721058	0.898077	0.862598	0.715719	0.896321	0.608696	0.74048	0.438529	0.789352	2	chrX	combined
split_1	CD4_positive,_alpha_beta_T_cell	0.869565	0.954545	0.807692	0.870059	0.780962	0.935061	0.878846	0.796154	0.942308	0.879675	0.79699	0.949833	0.740602	0.75193	0.592308	0.877058	24	SLE	combined
split_1	CD4_T_cell_Effector_Memory	0.565217	0.666667	0.461538	0.561924	0.441962	0.674723	0.580769	0.467308	0.694231	0.61204	0.550255	0.704308	0.154412	0.164083	-0.0658292	0.399048	2	chrX	combined
split_1	CD4_T_cell_Effector_Memory	0.869565	1	0.769231	0.824769	0.778468	0.935061	0.846154	0.807692	0.942308	0.866221	0.832776	0.949833	0.743494	0.703211	0.640513	0.877058	20	SLE	combined
split_1	CD4_T_cell_Naive	0.630435	0.736842	0.538462	0.568772	0.498345	0.73913	0.617308	0.524904	0.752212	0.643684	0.578023	0.755853	0.277264	0.258303	0.0495791	0.516552	5	chrX	combined
split_1	CD4_T_cell_Naive	0.826087	0.846154	0.846154	0.826746	0.737096	0.913043	0.834615	0.728846	0.911538	0.829735	0.714465	0.896321	0.646154	0.664141	0.464901	0.824319	15	SLE	combined
split_1	CD4_T_cell_Treg	0.652174	0.619048	1	0.539382	0.45537	0.677617	0.575	0.525	0.675	0.604651	0.577778	0.666667	0.220339	0.301161	0.169967	0.483046	5	chrX	combined
split_1	CD4_T_cell_Treg	0.826087	0.846154	0.846154	0.757697	0.737096	0.912365	0.748077	0.728846	0.905769	0.728866	0.714465	0.895549	0.646154	0.509559	0.464901	0.823139	20	SLE	combined
split_1	CD8_positive,_alpha_beta_T_cell	0.695652	0.6875	0.846154	0.650633	0.574666	0.780914	0.642308	0.565385	0.773077	0.646536	0.600065	0.750258	0.358566	0.330773	0.138287	0.577497	7	chrX	combined
split_1	CD8_positive,_alpha_beta_T_cell	0.804348	0.904762	0.730769	0.890936	0.713579	0.891769	0.886538	0.726923	0.903846	0.863991	0.7307	0.912974	0.613084	0.778333	0.46794	0.803837	23	SLE	combined
split_1	CD8_T_cell_Cytotoxic_GZMH_	0.717391	0.724138	0.807692	0.73913	0.604051	0.822741	0.734615	0.596154	0.815481	0.722151	0.618825	0.797173	0.414873	0.469231	0.195336	0.646272	4	chrX	combined
split_1	CD8_T_cell_Cytotoxic_GZMH_	0.891304	0.956522	0.846154	0.934939	0.80481	0.956687	0.936538	0.821154	0.961538	0.929632	0.818779	0.966555	0.782609	0.868909	0.646675	0.916057	28	SLE	combined
split_1	CD8_T_cell_Cytotoxic_GZMK_	0.717391	0.740741	0.769231	0.718059	0.605565	0.822636	0.726923	0.596154	0.815385	0.724956	0.618968	0.791866	0.421663	0.45168	0.195336	0.64461	3	chrX	combined
split_1	CD8_T_cell_Cytotoxic_GZMK_	0.73913	0.9375	0.576923	0.685117	0.625642	0.826087	0.725	0.674904	0.846154	0.746894	0.697476	0.866221	0.498182	0.484814	0.388881	0.703211	23	SLE	combined
split_1	CD8_T_cell_MAIT	0.666667	0.777778	0.56	0.645147	0.550265	0.778217	0.65	0.575	0.78525	0.650794	0.6	0.784722	0.347826	0.298807	0.158114	0.583512	17	chrX	combined
split_1	CD8_T_cell_MAIT	0.844444	0.909091	0.8	0.777119	0.755556	0.933466	0.79	0.765	0.935	0.786199	0.751608	0.928889	0.689655	0.583512	0.53	0.866541	21	SLE	combined
split_1	CD8_T_cell_Naive	0.652174	0.777778	0.538462	0.631308	0.537628	0.760078	0.638462	0.561538	0.776923	0.651218	0.599843	0.780672	0.323529	0.275601	0.126402	0.557612	2	chrX	combined
split_1	CD8_T_cell_Naive	0.73913	0.791667	0.730769	0.718598	0.631308	0.84819	0.721154	0.62875	0.848077	0.715719	0.640268	0.831572	0.475285	0.438529	0.262658	0.692831	12	SLE	combined
split_1	Classical_monocyte	0.76087	0.826087	0.730769	0.845807	0.653491	0.848476	0.836538	0.657692	0.853846	0.807404	0.664944	0.846405	0.521739	0.691262	0.312986	0.701646	4	chrX	combined
split_1	Classical_monocyte	0.673913	0.73913	0.653846	0.718598	0.550126	0.782609	0.721154	0.561538	0.784615	0.715719	0.599707	0.77146	0.347826	0.438529	0.125958	0.564902	23	SLE	combined
split_1	Conventional_DC	0.521739	0.642857	0.346154	0.565835	0.374105	0.625699	0.653846	0.434615	0.655769	0.698997	0.538685	0.673883	0.0899281	0.402422	-0.138287	0.339889	10	chrX	combined
split_1	Conventional_DC	0.826087	0.909091	0.769231	0.891769	0.737154	0.913375	0.898077	0.740385	0.923077	0.896321	0.740347	0.929632	0.654135	0.789352	0.488564	0.839719	17	SLE	combined
split_1	Lymphocyte	0.608696	0.605263	0.884615	0.459212	0.443701	0.677617	0.451923	0.473077	0.667308	0.543008	0.552341	0.663634	0.144628	-0.103593	-0.0792594	0.407452	8	chrX	combined
split_1	Lymphocyte	0.73913	0.75	0.807692	0.783432	0.629183	0.84086	0.790385	0.621154	0.830769	0.783293	0.635452	0.807404	0.463035	0.576353	0.243955	0.68927	29	SLE	combined
split_1	natural_killer_cell	0.630435	0.645161	0.769231	0.527817	0.493366	0.733954	0.528846	0.484615	0.723077	0.579849	0.557785	0.707559	0.225743	0.0693375	-0.0355506	0.468239	21	chrX	combined
split_1	natural_killer_cell	0.76087	0.777778	0.807692	0.780914	0.652174	0.866977	0.773077	0.646154	0.855962	0.751792	0.651059	0.834687	0.510638	0.554755	0.292308	0.734465	38	SLE	combined
split_1	NK_cell_Bright	0.717391	0.709677	0.846154	0.68454	0.600932	0.803685	0.673077	0.590385	0.798077	0.668687	0.614994	0.772941	0.407921	0.372934	0.188151	0.619282	8	chrX	combined
split_1	NK_cell_Bright	0.847826	1	0.730769	0.824769	0.75458	0.935061	0.846154	0.788462	0.942308	0.866221	0.816054	0.949833	0.702403	0.703211	0.610089	0.877058	25	SLE	combined
split_1	NK_cell_Dim	0.76087	0.941176	0.615385	0.704949	0.652281	0.848186	0.75	0.694231	0.865385	0.782609	0.715628	0.882943	0.537477	0.550482	0.422904	0.735738	2	chrX	combined
split_1	NK_cell_Dim	0.717391	0.809524	0.653846	0.740119	0.588721	0.826746	0.746154	0.607596	0.834615	0.740347	0.627648	0.829783	0.441121	0.488564	0.213747	0.664141	26	SLE	combined
split_1	Non_classical_monocyte	0.695652	0.714286	0.769231	0.695652	0.581476	0.801752	0.690385	0.571154	0.792308	0.686198	0.603621	0.77146	0.373541	0.380769	0.146153	0.600411	4	chrX	combined
split_1	Non_classical_monocyte	0.934783	1	0.884615	1	0.869565	1	1	0.884615	1	1	0.899666	1	0.869565	1	0.769231	1	26	SLE	combined
split_1	Plasmablast	0.756757	0.73913	0.85	0.836631	0.637879	0.86304	0.832353	0.635294	0.857353	0.790418	0.620108	0.819219	0.503726	0.674702	0.287115	0.734411	3	chrX	combined
split_1	Plasmablast	0.567568	0.625	0.5	0.666023	0.430754	0.701868	0.691176	0.439706	0.711765	0.686937	0.514685	0.689926	0.144509	0.407046	-0.122402	0.429899	95	SLE	combined
split_1	Plasmacytoid_DC	0.608696	0.605263	0.884615	0.575035	0.443701	0.669472	0.573077	0.473077	0.661538	0.604051	0.552341	0.658863	0.144628	0.175655	-0.0792594	0.398631	15	chrX	combined
split_1	Plasmacytoid_DC	0.73913	0.888889	0.615385	0.709958	0.620714	0.827778	0.744231	0.655769	0.84625	0.763434	0.673579	0.863036	0.492647	0.516542	0.329448	0.703211	24	SLE	combined
split_1	Progenitor_cell	0.681818	0.677419	0.84	0.601928	0.536093	0.784921	0.590526	0.536579	0.769474	0.617697	0.58712	0.744242	0.326039	0.192543	0.0746509	0.580964	4	chrX	combined
split_1	Progenitor_cell	0.568182	0.666667	0.48	0.545455	0.438993	0.683136	0.555789	0.462105	0.694737	0.598612	0.551435	0.704545	0.157258	0.111579	-0.0842927	0.397418	15	SLE	combined
split_1	B_cell_Atypical	0.704545	0.823529	0.583333	0.665501	0.588154	0.795772	0.704167	0.608333	0.808333	0.715593	0.615801	0.809269	0.421053	0.456531	0.231626	0.630616	14	chrX	combined
split_1	B_cell_Atypical	0.795455	0.894737	0.708333	0.772727	0.682477	0.88654	0.770833	0.704167	0.891667	0.740372	0.697676	0.886364	0.595918	0.541667	0.427231	0.780897	18	SLE	combined
split_1	B_cell_Memory	0.73913	0.769231	0.769231	0.689614	0.631213	0.843631	0.678846	0.626923	0.834615	0.67408	0.638744	0.815426	0.469231	0.372298	0.252634	0.68927	7	chrX	combined
split_1	B_cell_Memory	0.891304	0.888889	0.923077	0.933917	0.822636	0.956522	0.925	0.811538	0.955769	0.896552	0.78194	0.946295	0.777563	0.872966	0.64461	0.914174	24	SLE	combined
split_1	B_cell_Naive	0.782609	0.833333	0.769231	0.716434	0.693279	0.870062	0.709615	0.684615	0.878846	0.700235	0.686198	0.879064	0.562738	0.422081	0.375046	0.752795	3	chrX	combined
split_1	B_cell_Naive	0.913043	1	0.846154	0.935061	0.847322	0.978313	0.942308	0.865385	0.980769	0.949833	0.882943	0.983278	0.827068	0.877058	0.735738	0.956949	26	SLE	combined
split_1	B_cell	0.8	0.9	0.72	0.822751	0.705934	0.889219	0.825	0.72	0.9	0.806763	0.712	0.908378	0.604878	0.646135	0.44	0.8	6	chrX	combined
split_1	B_cell	0.8	0.9	0.72	0.844906	0.689799	0.889219	0.85	0.715	0.9	0.838384	0.710668	0.908406	0.604878	0.695837	0.439372	0.8	15	SLE	combined
split_1	CD4_positive,_alpha_beta_T_cell	0.804348	0.774194	0.923077	0.749693	0.704183	0.889862	0.736538	0.692308	0.880769	0.714807	0.681768	0.850652	0.590099	0.520841	0.423222	0.793116	2	chrX	combined
split_1	CD4_positive,_alpha_beta_T_cell	0.847826	0.88	0.846154	0.870062	0.76006	0.934939	0.873077	0.753846	0.936538	0.862598	0.740174	0.929632	0.692161	0.74048	0.511144	0.868909	24	SLE	combined
split_1	CD4_T_cell_Effector_Memory	0.695652	0.714286	0.769231	0.68454	0.575569	0.803685	0.673077	0.571058	0.798077	0.668687	0.603617	0.776415	0.373541	0.372934	0.145759	0.604792	2	chrX	combined
split_1	CD4_T_cell_Effector_Memory	0.891304	0.956522	0.846154	0.80481	0.80481	0.956687	0.815385	0.821154	0.961538	0.813346	0.829188	0.966555	0.782609	0.627758	0.646675	0.916057	20	SLE	combined
split_1	CD4_T_cell_Naive	0.73913	0.791667	0.730769	0.778295	0.629009	0.847311	0.767308	0.625	0.842308	0.743423	0.640268	0.831572	0.475285	0.556445	0.252634	0.68937	5	chrX	combined
split_1	CD4_T_cell_Naive	0.826087	0.875	0.807692	0.805184	0.739032	0.913373	0.809615	0.734615	0.917308	0.799331	0.728671	0.912974	0.65019	0.613941	0.469231	0.828268	15	SLE	combined
split_1	CD4_T_cell_Treg	0.652174	0.631579	0.923077	0.40597	0.485192	0.707686	0.448077	0.517308	0.7	0.54099	0.573871	0.684211	0.239669	-0.165392	0.0509525	0.494608	5	chrX	combined
split_1	CD4_T_cell_Treg	0.869565	0.916667	0.846154	0.761435	0.783432	0.956183	0.771154	0.784615	0.95	0.76732	0.772867	0.949833	0.737643	0.539719	0.564902	0.911538	20	SLE	combined
split_1	CD8_positive,_alpha_beta_T_cell	0.826087	0.875	0.807692	0.826749	0.718598	0.913373	0.828846	0.726923	0.917308	0.815426	0.715931	0.912974	0.65019	0.652691	0.45168	0.828268	7	chrX	combined
split_1	CD8_positive,_alpha_beta_T_cell	0.847826	0.913043	0.807692	0.80481	0.760078	0.934939	0.815385	0.765385	0.936538	0.813346	0.75565	0.93311	0.695652	0.627758	0.526235	0.868909	23	SLE	combined
split_1	CD8_T_cell_Cytotoxic_GZMH_	0.76087	0.826087	0.730769	0.803685	0.653499	0.868548	0.798077	0.663462	0.861538	0.776415	0.671823	0.847849	0.521739	0.600207	0.326923	0.734465	4	chrX	combined
split_1	CD8_T_cell_Cytotoxic_GZMH_	0.804348	1	0.653846	0.847322	0.704949	0.891561	0.865385	0.75	0.903846	0.882943	0.782609	0.916388	0.621572	0.735738	0.550482	0.803837	28	SLE	combined
split_1	CD8_T_cell_Cytotoxic_GZMK_	0.73913	0.75	0.807692	0.76006	0.625531	0.845807	0.753846	0.615385	0.836538	0.736901	0.630954	0.815426	0.463035	0.511144	0.237004	0.68927	3	chrX	combined
split_1	CD8_T_cell_Cytotoxic_GZMK_	0.847826	0.952381	0.769231	0.891561	0.757805	0.913375	0.903846	0.776923	0.923077	0.916388	0.780672	0.93311	0.699065	0.803837	0.564902	0.839719	23	SLE	combined
split_1	CD8_T_cell_MAIT	0.733333	0.69697	0.92	0.662963	0.602663	0.81606	0.66	0.61	0.805	0.649016	0.616336	0.765448	0.4375	0.382473	0.274903	0.654742	17	chrX	combined
split_1	CD8_T_cell_MAIT	0.822222	1	0.68	0.866271	0.721997	0.911287	0.88	0.76	0.92	0.893333	0.786667	0.928889	0.653846	0.764601	0.570088	0.83666	21	SLE	combined
split_1	CD8_T_cell_Naive	0.695652	0.676471	0.884615	0.704183	0.557469	0.780914	0.692308	0.553846	0.773077	0.681768	0.593311	0.743423	0.350806	0.423448	0.125157	0.600925	2	chrX	combined
split_1	CD8_T_cell_Naive	0.73913	0.85	0.653846	0.760078	0.629212	0.848186	0.776923	0.655577	0.853846	0.780672	0.664944	0.863036	0.486989	0.557612	0.312742	0.703211	12	SLE	combined
split_1	Classical_monocyte	0.804348	0.84	0.807692	0.803685	0.71344	0.891564	0.798077	0.7075	0.892308	0.776415	0.700235	0.879675	0.604207	0.600207	0.418917	0.78087	4	chrX	combined
split_1	Classical_monocyte	0.804348	0.84	0.807692	0.783437	0.695652	0.891769	0.784615	0.690385	0.898077	0.77146	0.686256	0.880256	0.604207	0.564902	0.380769	0.789352	23	SLE	combined
split_1	Conventional_DC	0.586957	0.62069	0.692308	0.693279	0.449311	0.696812	0.684615	0.438462	0.696154	0.679885	0.537625	0.687453	0.144814	0.375046	-0.125958	0.389897	10	chrX	combined
split_1	Conventional_DC	0.826087	0.909091	0.769231	0.783437	0.737154	0.913375	0.784615	0.746154	0.923077	0.77146	0.740347	0.91705	0.654135	0.564902	0.489809	0.839719	17	SLE	combined
split_1	Lymphocyte	0.782609	0.9	0.692308	0.760078	0.674684	0.870062	0.776923	0.7	0.884615	0.780672	0.704308	0.896321	0.572491	0.557612	0.400775	0.769231	8	chrX	combined
split_1	Lymphocyte	0.782609	1	0.615385	0.847322	0.679041	0.869565	0.865385	0.730769	0.884615	0.882943	0.765886	0.899666	0.581818	0.735738	0.52105	0.769231	29	SLE	combined
split_1	natural_killer_cell	0.673913	0.761905	0.615385	0.709958	0.556936	0.783432	0.744231	0.563462	0.796154	0.763434	0.599836	0.783293	0.35514	0.516542	0.12638	0.592308	21	chrX	combined
split_1	natural_killer_cell	0.804348	0.814815	0.846154	0.869565	0.7096	0.891564	0.867308	0.701923	0.892308	0.847762	0.693576	0.879094	0.599613	0.734615	0.418707	0.782476	38	SLE	combined
split_1	NK_cell_Bright	0.804348	0.814815	0.846154	0.783432	0.695652	0.891564	0.790385	0.690385	0.892308	0.783293	0.686198	0.879094	0.599613	0.576353	0.380769	0.782114	8	chrX	combined
split_1	NK_cell_Bright	0.804348	0.869565	0.769231	0.761441	0.708961	0.891769	0.759615	0.709615	0.898077	0.745819	0.709699	0.896321	0.608696	0.516752	0.422995	0.789352	25	SLE	combined
split_1	NK_cell_Dim	0.673913	0.866667	0.5	0.595151	0.541943	0.760078	0.636538	0.598077	0.788462	0.658505	0.629181	0.813182	0.37613	0.294203	0.221446	0.610089	2	chrX	combined
split_1	NK_cell_Dim	0.869565	0.884615	0.884615	0.84819	0.783437	0.956522	0.848077	0.784615	0.955769	0.831572	0.766809	0.946295	0.734615	0.692831	0.57578	0.911538	26	SLE	combined
split_1	Non_classical_monocyte	0.76087	0.941176	0.615385	0.7301	0.651843	0.848186	0.769231	0.688462	0.865385	0.799331	0.709429	0.882943	0.537477	0.580119	0.414563	0.735738	4	chrX	combined
split_1	Non_classical_monocyte	0.891304	0.956522	0.846154	0.891769	0.824769	0.956687	0.898077	0.828846	0.961538	0.896321	0.818779	0.966555	0.782609	0.789352	0.652691	0.916057	26	SLE	combined
split_1	Plasmablast	0.567568	0.590909	0.65	0.500033	0.430754	0.69359	0.517647	0.433676	0.689706	0.549487	0.510455	0.659359	0.121662	0.0427265	-0.137831	0.398939	3	chrX	combined
split_1	Plasmablast	0.756757	0.789474	0.75	0.838075	0.622175	0.865063	0.841176	0.632353	0.870588	0.819219	0.624266	0.861049	0.512445	0.680355	0.272004	0.741176	95	SLE	combined
split_1	Plasmacytoid_DC	0.695652	0.657895	0.961538	0.71669	0.539382	0.763908	0.705769	0.561538	0.75	0.689474	0.597324	0.722222	0.334711	0.494608	0.195479	0.600925	15	chrX	combined
split_1	Plasmacytoid_DC	0.782609	0.9	0.692308	0.672834	0.689855	0.870059	0.688462	0.707692	0.884615	0.694596	0.709699	0.899666	0.572491	0.379486	0.415385	0.769231	24	SLE	combined
split_1	Progenitor_cell	0.454545	1	0.04	0.308369	0.260462	0.395238	0.52	0.5	0.56	0.585455	0.568182	0.62	0.0347349	0.132945	0	0.235817	4	chrX	combined
split_1	Progenitor_cell	0.704545	0.8	0.64	0.749096	0.582386	0.818182	0.767368	0.595789	0.821053	0.773434	0.626279	0.823983	0.416327	0.538721	0.201395	0.636765	15	SLE	combined
split_1	B_cell_Atypical	0.704545	0.666667	0.916667	0.656217	0.561793	0.786777	0.658333	0.583333	0.779167	0.638592	0.5905	0.733749	0.380952	0.376256	0.210782	0.609343	14	chrX	combined
split_1	B_cell_Atypical	0.795455	0.941176	0.666667	0.771316	0.692489	0.88607	0.783333	0.720833	0.891667	0.774411	0.719444	0.886364	0.59919	0.573886	0.463949	0.780897	18	SLE	combined
split_1	B_cell_Memory	0.652174	0.666667	0.769231	0.549343	0.52348	0.757697	0.540385	0.520865	0.748077	0.586068	0.575749	0.728866	0.275591	0.0870179	0.0441966	0.520841	7	chrX	combined
split_1	B_cell_Memory	0.826087	0.821429	0.884615	0.801752	0.729606	0.913043	0.792308	0.717308	0.911538	0.766809	0.707469	0.895549	0.642023	0.600411	0.464372	0.824319	24	SLE	combined
split_1	B_cell_Naive	0.673913	0.72	0.692308	0.54457	0.565217	0.782609	0.538462	0.563173	0.778846	0.585284	0.599526	0.76732	0.340344	0.0765559	0.125918	0.557692	3	chrX	combined
split_1	B_cell_Naive	0.891304	0.956522	0.846154	0.913375	0.80481	0.956687	0.917308	0.815385	0.961538	0.912974	0.813346	0.966555	0.782609	0.828268	0.639875	0.916057	26	SLE	combined
split_1	B_cell	0.688889	0.689655	0.8	0.756042	0.570081	0.794805	0.755	0.565	0.785	0.735	0.590635	0.751344	0.357143	0.507972	0.133237	0.597614	6	chrX	combined
split_1	B_cell	0.777778	0.857143	0.72	0.711686	0.667297	0.867063	0.71	0.685	0.88	0.695556	0.680367	0.875556	0.558824	0.41833	0.37774	0.764601	15	SLE	combined
split_1	CD4_positive,_alpha_beta_T_cell	0.782609	0.9	0.692308	0.805184	0.672834	0.870059	0.809615	0.694231	0.878846	0.799331	0.704308	0.882943	0.572491	0.613941	0.398957	0.75193	2	chrX	combined
split_1	CD4_positive,_alpha_beta_T_cell	0.869565	0.916667	0.846154	0.891564	0.782609	0.936117	0.892308	0.784615	0.942692	0.879064	0.77146	0.949833	0.737643	0.78087	0.564902	0.878782	24	SLE	combined
split_1	CD4_T_cell_Effector_Memory	0.76087	0.857143	0.692308	0.80481	0.653491	0.848476	0.815385	0.675	0.861538	0.813346	0.679673	0.863036	0.527103	0.627758	0.350823	0.734465	2	chrX	combined
split_1	CD4_T_cell_Effector_Memory	0.869565	0.884615	0.884615	0.845807	0.783391	0.935061	0.836538	0.784615	0.942308	0.807404	0.766522	0.929632	0.734615	0.691262	0.564902	0.877058	20	SLE	combined
split_1	CD4_T_cell_Naive	0.717391	0.782609	0.692308	0.760078	0.608696	0.82612	0.776923	0.611346	0.828846	0.780672	0.630788	0.815426	0.434783	0.557612	0.224625	0.652691	5	chrX	combined
split_1	CD4_T_cell_Naive	0.782609	0.9	0.692308	0.783437	0.674684	0.870062	0.784615	0.694231	0.884615	0.77146	0.704308	0.896321	0.572491	0.564902	0.398957	0.769231	15	SLE	combined
split_1	CD4_T_cell_Treg	0.608696	0.75	0.461538	0.693347	0.469354	0.716456	0.713462	0.515385	0.732692	0.7199	0.573244	0.746894	0.247273	0.433647	0.0355506	0.484814	5	chrX	combined
split_1	CD4_T_cell_Treg	0.913043	1	0.846154	0.935061	0.847322	0.978313	0.942308	0.865385	0.980769	0.949833	0.882943	0.983278	0.827068	0.877058	0.735738	0.956949	20	SLE	combined
split_1	CD8_positive,_alpha_beta_T_cell	0.891304	0.862069	0.961538	0.843631	0.819737	0.956183	0.830769	0.805769	0.95	0.797173	0.772941	0.929806	0.774951	0.699569	0.64461	0.914174	7	chrX	combined
split_1	CD8_positive,_alpha_beta_T_cell	0.826087	0.821429	0.884615	0.869565	0.729321	0.913043	0.867308	0.717308	0.911538	0.847762	0.701035	0.896321	0.642023	0.734615	0.464372	0.832666	23	SLE	combined
split_1	CD8_T_cell_Cytotoxic_GZMH_	0.673913	0.666667	0.846154	0.539855	0.539855	0.769928	0.534615	0.540288	0.755962	0.582923	0.586029	0.729212	0.308617	0.0781575	0.0865749	0.563545	4	chrX	combined
split_1	CD8_T_cell_Cytotoxic_GZMH_	0.826087	0.95	0.730769	0.778468	0.734161	0.913373	0.807692	0.757692	0.917308	0.832776	0.7644	0.916388	0.657993	0.640513	0.523501	0.828268	28	SLE	combined
split_1	CD8_T_cell_Cytotoxic_GZMK_	0.782609	0.75	0.923077	0.737096	0.669472	0.866977	0.728846	0.661538	0.855769	0.714465	0.658863	0.823021	0.541833	0.464901	0.377761	0.740593	3	chrX	combined
split_1	CD8_T_cell_Cytotoxic_GZMK_	0.804348	1	0.653846	0.935061	0.704949	0.891561	0.942308	0.75	0.903846	0.949833	0.782609	0.916388	0.621572	0.877058	0.550482	0.803837	23	SLE	combined
split_1	CD8_T_cell_MAIT	0.688889	0.677419	0.84	0.711111	0.566667	0.794805	0.705	0.56	0.785	0.680508	0.587556	0.749778	0.350515	0.490044	0.126491	0.600833	17	chrX	combined
split_1	CD8_T_cell_MAIT	0.822222	0.904762	0.76	0.866271	0.732543	0.911287	0.88	0.74	0.915	0.893333	0.728254	0.911111	0.647059	0.764601	0.478091	0.825064	21	SLE	combined
split_1	CD8_T_cell_Naive	0.652174	0.647059	0.846154	0.592608	0.512811	0.743798	0.592308	0.521154	0.730769	0.615113	0.575898	0.708552	0.258065	0.2307	0.0509525	0.512893	2	chrX	combined
split_1	CD8_T_cell_Naive	0.804348	0.793103	0.884615	0.774671	0.693279	0.890936	0.761538	0.684615	0.886538	0.735786	0.679885	0.863991	0.594912	0.563545	0.377761	0.782114	12	SLE	combined
split_1	Classical_monocyte	0.782609	0.833333	0.769231	0.870059	0.674693	0.870062	0.878846	0.676923	0.878846	0.879675	0.679636	0.879064	0.562738	0.75193	0.363	0.75193	4	chrX	combined
split_1	Classical_monocyte	0.869565	0.916667	0.846154	0.934939	0.782609	0.935061	0.936538	0.790385	0.942308	0.929632	0.77146	0.946295	0.737643	0.868909	0.576353	0.877058	23	SLE	combined
split_1	Conventional_DC	0.521739	0.7	0.269231	0.421113	0.358025	0.605741	0.521154	0.465385	0.655769	0.576714	0.552508	0.684075	0.109155	0.055333	-0.0786005	0.356351	10	chrX	combined
split_1	Conventional_DC	0.891304	0.92	0.884615	0.890936	0.804816	0.956687	0.886538	0.809615	0.961538	0.863991	0.791866	0.966555	0.780115	0.778333	0.613941	0.916057	17	SLE	combined
split_1	Lymphocyte	0.673913	0.789474	0.576923	0.718059	0.550167	0.781044	0.726923	0.575	0.790385	0.724956	0.60913	0.796577	0.362292	0.45168	0.160365	0.58066	8	chrX	combined
split_1	Lymphocyte	0.782609	0.863636	0.730769	0.826749	0.693347	0.870062	0.828846	0.696154	0.878846	0.815426	0.693144	0.879675	0.567669	0.652691	0.389324	0.75193	29	SLE	combined
split_1	natural_killer_cell	0.652174	0.708333	0.653846	0.653499	0.544558	0.761891	0.651923	0.544231	0.771154	0.658793	0.588629	0.761063	0.30038	0.301536	0.0877058	0.554755	21	chrX	combined
split_1	natural_killer_cell	0.804348	0.757576	0.961538	0.71669	0.697216	0.888308	0.705769	0.686538	0.875	0.689474	0.676445	0.83871	0.58517	0.494608	0.451787	0.778522	38	SLE	combined
split_1	NK_cell_Bright	0.717391	0.675676	0.961538	0.736394	0.560934	0.795203	0.725	0.580769	0.780769	0.702703	0.608043	0.750177	0.386037	0.562331	0.23846	0.639196	8	chrX	combined
split_1	NK_cell_Bright	0.847826	0.913043	0.807692	0.826746	0.761435	0.934939	0.834615	0.770865	0.936538	0.829735	0.761063	0.93311	0.695652	0.664141	0.539045	0.868909	25	SLE	combined
split_1	NK_cell_Dim	0.717391	0.882353	0.576923	0.633189	0.601242	0.806163	0.686538	0.63625	0.827019	0.713907	0.657631	0.832776	0.453382	0.421182	0.290423	0.664141	2	chrX	combined
split_1	NK_cell_Dim	0.782609	0.807692	0.807692	0.805184	0.674684	0.870062	0.809615	0.671154	0.873077	0.799331	0.672375	0.862598	0.557692	0.613941	0.340674	0.740485	26	SLE	combined
split_1	Non_classical_monocyte	0.782609	0.833333	0.769231	0.740124	0.674693	0.870062	0.740385	0.676923	0.878846	0.7307	0.67893	0.863991	0.562738	0.477113	0.350823	0.75193	4	chrX	combined
split_1	Non_classical_monocyte	0.869565	0.857143	0.923077	0.845807	0.780914	0.934939	0.836538	0.773077	0.936538	0.807404	0.750177	0.928571	0.731518	0.691262	0.556445	0.872966	26	SLE	combined
split_1	Plasmablast	0.72973	0.666667	1	0.735312	0.582987	0.800375	0.735294	0.617647	0.794118	0.689655	0.606061	0.740741	0.430769	0.569687	0.377627	0.660098	3	chrX	combined
split_1	Plasmablast	0.72973	0.75	0.75	0.64761	0.595189	0.837838	0.644118	0.594118	0.841176	0.628829	0.595164	0.819219	0.455882	0.289946	0.187684	0.680571	95	SLE	combined
split_1	Plasmacytoid_DC	0.652174	0.708333	0.653846	0.566874	0.523551	0.761891	0.563462	0.526923	0.765481	0.599707	0.578941	0.755853	0.30038	0.125958	0.055301	0.548755	15	chrX	combined
split_1	Plasmacytoid_DC	0.673913	0.923077	0.461538	0.652281	0.534557	0.757805	0.711538	0.609615	0.788462	0.749164	0.643684	0.816054	0.382826	0.491689	0.258303	0.610089	24	SLE	combined
split_1	Progenitor_cell	0.590909	0.589744	0.92	0.516335	0.408854	0.605994	0.538947	0.452632	0.611579	0.588019	0.546069	0.629043	0.0854503	0.121573	-0.145487	0.362738	4	chrX	combined
split_1	Progenitor_cell	0.568182	0.8	0.32	0.523691	0.404203	0.654738	0.613684	0.507105	0.700053	0.654091	0.571861	0.738531	0.196154	0.291999	0.018019	0.463977	15	SLE	combined
split_2	B_cell_Atypical	0.644444	0.764706	0.52	0.730159	0.509662	0.755556	0.75	0.54	0.775	0.751634	0.576889	0.768889	0.307692	0.51245	0.08	0.55667	5	chrX	boruta
split_2	B_cell_Atypical	0.733333	1	0.52	0.581251	0.611578	0.820106	0.66	0.68	0.84	0.697778	0.715556	0.857778	0.490566	0.4159	0.447214	0.696932	10	SLE	boruta
split_2	B_cell_Memory	0.76087	0.741935	0.884615	0.620246	0.645273	0.848204	0.609615	0.636442	0.848173	0.626713	0.643255	0.815594	0.49901	0.231834	0.291428	0.715626	4	chrX	boruta
split_2	B_cell_Memory	0.869565	0.884615	0.884615	0.868548	0.783437	0.934939	0.861538	0.784615	0.936538	0.834687	0.766809	0.929632	0.734615	0.734465	0.564902	0.868909	17	SLE	boruta
split_2	B_cell_Naive	0.652174	0.666667	0.769231	0.693279	0.51225	0.754277	0.684615	0.503846	0.74625	0.679885	0.567116	0.728866	0.275591	0.375046	0.0096125	0.512475	2	chrX	boruta
split_2	B_cell_Naive	0.847826	0.952381	0.769231	0.848476	0.757805	0.934562	0.853846	0.776923	0.930769	0.846154	0.780672	0.93311	0.699065	0.701646	0.557612	0.867396	14	SLE	boruta
split_2	B_cell	0.711111	0.714286	0.8	0.749206	0.586134	0.820963	0.74	0.58	0.815	0.712	0.59914	0.783704	0.406091	0.505964	0.171736	0.63901	6	chrX	boruta
split_2	B_cell	0.822222	0.84	0.84	0.867063	0.731444	0.911111	0.87	0.725	0.91	0.855845	0.703704	0.890844	0.64	0.7356	0.456435	0.821584	13	SLE	boruta
split_2	CD4_positive,_alpha_beta_T_cell	0.717391	0.709677	0.846154	0.689614	0.604051	0.822636	0.678846	0.598077	0.811538	0.67408	0.618825	0.78194	0.407921	0.372298	0.227965	0.646154	4	chrX	boruta
split_2	CD4_positive,_alpha_beta_T_cell	0.782609	0.863636	0.730769	0.80481	0.674684	0.870062	0.815385	0.684615	0.879135	0.813346	0.688859	0.879675	0.567669	0.627758	0.379264	0.752795	19	SLE	boruta
split_2	CD4_T_cell_Effector_Memory	0.5	1	0.115385	0.352484	0.309426	0.501812	0.538462	0.519231	0.615385	0.598662	0.58194	0.665552	0.101868	0.186989	0.130744	0.339683	2	chrX	boruta
split_2	CD4_T_cell_Effector_Memory	0.847826	1	0.730769	0.869565	0.75458	0.935061	0.884615	0.788462	0.942308	0.899666	0.816054	0.949833	0.702403	0.769231	0.610089	0.877058	12	SLE	boruta
split_2	CD4_T_cell_Naive	0.717391	0.69697	0.884615	0.769928	0.592608	0.801752	0.755769	0.586538	0.792308	0.728753	0.611526	0.766809	0.400802	0.577497	0.188151	0.639196	5	chrX	boruta
split_2	CD4_T_cell_Naive	0.782609	0.785714	0.846154	0.733954	0.672809	0.870059	0.723077	0.665385	0.873173	0.707469	0.666419	0.847762	0.552529	0.464372	0.333018	0.752042	17	SLE	boruta
split_2	CD4_T_cell_Treg	0.586957	0.818182	0.346154	0.665336	0.432595	0.679041	0.7	0.521154	0.71375	0.715942	0.576714	0.746894	0.226549	0.422995	0.055333	0.484814	4	chrX	boruta
split_2	CD4_T_cell_Treg	0.847826	0.952381	0.769231	0.848186	0.757805	0.935061	0.859615	0.771154	0.942308	0.863036	0.780639	0.946295	0.699065	0.715798	0.557612	0.877058	16	SLE	boruta
split_2	CD8_positive,_alpha_beta_T_cell	0.804348	0.793103	0.884615	0.934939	0.697216	0.890936	0.936538	0.692308	0.886538	0.929632	0.681768	0.863991	0.594912	0.868909	0.418707	0.782114	7	chrX	boruta
split_2	CD8_positive,_alpha_beta_T_cell	0.782609	0.863636	0.730769	0.757697	0.693347	0.870062	0.748077	0.696154	0.879135	0.728866	0.694596	0.882943	0.567669	0.509559	0.398957	0.752795	16	SLE	boruta
split_2	CD8_T_cell_Cytotoxic_GZMH_	0.630435	0.736842	0.538462	0.561924	0.505184	0.740119	0.580769	0.530769	0.754038	0.61204	0.581271	0.751421	0.277264	0.164083	0.0615385	0.511425	4	chrX	boruta
split_2	CD8_T_cell_Cytotoxic_GZMH_	0.847826	0.913043	0.807692	0.804816	0.761435	0.934562	0.803846	0.765385	0.930769	0.787157	0.755853	0.93311	0.695652	0.604792	0.526235	0.867396	17	SLE	boruta
split_2	CD8_T_cell_Cytotoxic_GZMK_	0.630435	0.666667	0.692308	0.729606	0.51801	0.737198	0.717308	0.507692	0.729135	0.701035	0.56904	0.721575	0.243714	0.468239	0.0156269	0.469231	2	chrX	boruta
split_2	CD8_T_cell_Cytotoxic_GZMK_	0.913043	0.958333	0.884615	0.978313	0.847322	0.978313	0.980769	0.848077	0.980769	0.983278	0.846154	0.983278	0.825095	0.956949	0.692831	0.956949	20	SLE	boruta
split_2	CD8_T_cell_MAIT	0.772727	0.705882	1	0.83416	0.6649	0.85918	0.825	0.675	0.85	0.774194	0.648649	0.8	0.521739	0.709384	0.476474	0.748331	6	chrX	boruta
split_2	CD8_T_cell_MAIT	0.909091	1	0.833333	0.909091	0.839175	0.977308	0.916667	0.854167	0.979167	0.924242	0.867424	0.981061	0.819672	0.833333	0.724356	0.955353	18	SLE	boruta
split_2	CD8_T_cell_Naive	0.782609	0.9	0.692308	0.848186	0.672834	0.870059	0.859615	0.688462	0.884615	0.863036	0.699684	0.896321	0.572491	0.715798	0.389499	0.769231	12	SLE	boruta
split_2	Classical_monocyte	0.76087	0.826087	0.730769	0.652174	0.652174	0.848476	0.663462	0.657692	0.861538	0.671823	0.664944	0.862598	0.521739	0.326923	0.312986	0.734465	3	chrX	boruta
split_2	Classical_monocyte	0.891304	0.92	0.884615	0.870062	0.804816	0.956687	0.873077	0.811442	0.961538	0.862598	0.791866	0.966555	0.780115	0.74048	0.627758	0.916057	22	SLE	boruta
split_2	Conventional_DC	0.521739	0.642857	0.346154	0.397605	0.387556	0.625699	0.434615	0.440385	0.661538	0.538685	0.542642	0.684075	0.0899281	-0.138287	-0.131269	0.355696	1	chrX	boruta
split_2	Conventional_DC	0.782609	1	0.615385	0.778468	0.679041	0.869565	0.807692	0.730769	0.884615	0.832776	0.765886	0.899666	0.581818	0.640513	0.52105	0.769231	12	SLE	boruta
split_2	Lymphocyte	0.673913	0.703704	0.730769	0.631318	0.565217	0.780998	0.626923	0.557692	0.773365	0.640268	0.59609	0.761063	0.332689	0.252634	0.115385	0.557692	7	chrX	boruta
split_2	Lymphocyte	0.891304	0.956522	0.846154	0.848476	0.805184	0.956687	0.853846	0.821154	0.961538	0.846154	0.815426	0.966555	0.782609	0.701646	0.646675	0.916057	22	SLE	boruta
split_2	natural_killer_cell	0.695652	0.75	0.692308	0.675306	0.581476	0.804816	0.676923	0.576923	0.809615	0.67893	0.607609	0.796999	0.387833	0.350823	0.154892	0.613941	8	chrX	boruta
split_2	natural_killer_cell	0.782609	0.863636	0.730769	0.84819	0.675306	0.871137	0.848077	0.688462	0.885	0.831572	0.693555	0.879675	0.567669	0.692831	0.379486	0.769813	32	SLE	boruta
split_2	NK_cell_Bright	0.826087	0.8	0.923077	0.819737	0.71669	0.911318	0.805769	0.709423	0.9	0.772941	0.694988	0.866667	0.637795	0.65885	0.464372	0.823077	8	chrX	boruta
split_2	NK_cell_Bright	0.804348	1	0.653846	0.801841	0.704949	0.891561	0.826923	0.75	0.903846	0.849498	0.782609	0.916388	0.621572	0.671512	0.550482	0.803837	21	SLE	boruta
split_2	NK_cell_Dim	0.782609	0.807692	0.807692	0.674693	0.674693	0.870062	0.671154	0.676635	0.875	0.672375	0.673995	0.862598	0.557692	0.340674	0.350316	0.75193	6	chrX	boruta
split_2	NK_cell_Dim	0.891304	1	0.807692	0.891561	0.824769	0.956687	0.903846	0.846154	0.961538	0.916388	0.866221	0.966555	0.785047	0.803837	0.703211	0.916057	22	SLE	boruta
split_2	Non_classical_monocyte	0.76087	0.894737	0.653846	0.75458	0.659254	0.848476	0.788462	0.682692	0.865385	0.816054	0.697332	0.879675	0.532348	0.610089	0.389302	0.735738	3	chrX	boruta
split_2	Non_classical_monocyte	0.847826	0.913043	0.807692	0.84819	0.760078	0.913375	0.848077	0.765385	0.923077	0.831572	0.755853	0.929632	0.695652	0.692831	0.526235	0.839719	19	SLE	boruta
split_2	Plasmablast	0.641026	0.645161	0.869565	0.663818	0.491999	0.728797	0.644022	0.485054	0.706522	0.669795	0.582623	0.712451	0.197059	0.350878	-0.0364119	0.479975	3	chrX	boruta
split_2	Plasmablast	0.74359	0.782609	0.782609	0.745625	0.617871	0.846154	0.754076	0.607337	0.841033	0.7653	0.649944	0.834258	0.470109	0.500064	0.225842	0.68636	9	SLE	boruta
split_2	Plasmacytoid_DC	0.673913	0.641026	0.961538	0.645992	0.508762	0.736394	0.65	0.536538	0.725	0.65	0.583816	0.702703	0.282744	0.441588	0.123383	0.536388	7	chrX	boruta
split_2	Plasmacytoid_DC	0.782609	0.785714	0.846154	0.845807	0.672809	0.870062	0.836538	0.665385	0.873077	0.807404	0.666345	0.850652	0.552529	0.691262	0.333018	0.740593	17	SLE	boruta
split_2	Progenitor_cell	0.65	0.666667	0.666667	0.648246	0.524104	0.774576	0.654135	0.522556	0.773183	0.628361	0.536688	0.725541	0.298246	0.311408	0.0452833	0.550689	2	chrX	boruta
split_2	Progenitor_cell	0.725	0.65625	1	0.759939	0.591667	0.817742	0.763158	0.631579	0.815789	0.7	0.6	0.75	0.43299	0.606977	0.39736	0.688247	13	SLE	boruta
split_2	B_cell_Atypical	0.6	0.64	0.64	0.576504	0.468254	0.711969	0.57	0.475	0.715	0.593846	0.543651	0.703232	0.19	0.140848	-0.051245	0.427443	5	chrX	boruta
split_2	B_cell_Atypical	0.755556	0.818182	0.72	0.799397	0.645112	0.844906	0.795	0.65	0.855	0.76735	0.650794	0.838384	0.512315	0.593572	0.298807	0.71	10	SLE	boruta
split_2	B_cell_Memory	0.652174	0.8125	0.5	0.556936	0.52338	0.757805	0.586538	0.567308	0.776923	0.616952	0.604236	0.783957	0.330909	0.180144	0.142354	0.576541	4	chrX	boruta
split_2	B_cell_Memory	0.847826	0.88	0.846154	0.870062	0.76006	0.934562	0.873077	0.753846	0.930769	0.862598	0.743269	0.928571	0.692161	0.74048	0.511144	0.867396	17	SLE	boruta
split_2	B_cell_Naive	0.652174	0.666667	0.769231	0.658672	0.522141	0.757697	0.648077	0.515385	0.748077	0.651059	0.57292	0.728866	0.275591	0.326055	0.0338758	0.511144	2	chrX	boruta
split_2	B_cell_Naive	0.826087	0.909091	0.769231	0.848476	0.718572	0.913375	0.853846	0.734519	0.923077	0.846154	0.73561	0.929632	0.654135	0.701646	0.469197	0.839719	14	SLE	boruta
split_2	B_cell	0.711111	0.75	0.72	0.711111	0.598732	0.822222	0.72	0.595	0.82	0.712	0.6096	0.794489	0.41791	0.44	0.19	0.64	6	chrX	boruta
split_2	B_cell	0.777778	0.941176	0.64	0.8	0.675317	0.86693	0.81	0.705	0.88	0.803556	0.711681	0.893333	0.567308	0.62	0.437691	0.764601	13	SLE	boruta
split_2	CD4_positive,_alpha_beta_T_cell	0.73913	0.85	0.653846	0.760078	0.629212	0.848186	0.776923	0.644231	0.853846	0.780672	0.657631	0.846405	0.486989	0.557612	0.290423	0.701646	4	chrX	boruta
split_2	CD4_positive,_alpha_beta_T_cell	0.826087	0.875	0.807692	0.847311	0.736939	0.913375	0.842308	0.734615	0.917308	0.818779	0.722151	0.912974	0.65019	0.68927	0.469231	0.828268	19	SLE	boruta
split_2	CD4_T_cell_Effector_Memory	0.717391	0.709677	0.846154	0.729606	0.603895	0.822636	0.717308	0.596154	0.811538	0.701035	0.618825	0.78194	0.407921	0.468239	0.227965	0.646154	2	chrX	boruta
split_2	CD4_T_cell_Effector_Memory	0.869565	1	0.769231	0.891561	0.778468	0.935061	0.903846	0.807692	0.942308	0.916388	0.832776	0.949833	0.743494	0.803837	0.640513	0.877058	12	SLE	boruta
split_2	CD4_T_cell_Naive	0.608696	0.833333	0.384615	0.614165	0.46683	0.695652	0.661538	0.547981	0.730769	0.684075	0.592093	0.763434	0.263345	0.355696	0.103593	0.516542	5	chrX	boruta
split_2	CD4_T_cell_Naive	0.782609	0.833333	0.769231	0.782609	0.674693	0.870062	0.778846	0.682692	0.878942	0.761063	0.679885	0.879064	0.562738	0.557692	0.363641	0.752795	17	SLE	boruta
split_2	CD4_T_cell_Treg	0.695652	0.6875	0.846154	0.527817	0.561827	0.79038	0.528846	0.559615	0.775	0.579849	0.596635	0.751792	0.358566	0.0693375	0.131269	0.600411	4	chrX	boruta
split_2	CD4_T_cell_Treg	0.847826	0.913043	0.807692	0.870062	0.761435	0.934939	0.873077	0.765385	0.936538	0.862598	0.760802	0.93311	0.695652	0.74048	0.526235	0.868909	16	SLE	boruta
split_2	CD8_positive,_alpha_beta_T_cell	0.804348	0.869565	0.769231	0.913375	0.71377	0.891769	0.917308	0.715385	0.898077	0.912974	0.709699	0.896321	0.608696	0.828268	0.433647	0.789352	7	chrX	boruta
split_2	CD8_positive,_alpha_beta_T_cell	0.826087	0.846154	0.846154	0.801752	0.733954	0.913043	0.792308	0.726731	0.911538	0.766809	0.714465	0.896321	0.646154	0.600411	0.464372	0.824517	16	SLE	boruta
split_2	CD8_T_cell_Cytotoxic_GZMH_	0.630435	0.714286	0.576923	0.541967	0.521739	0.740124	0.555769	0.525	0.753846	0.595846	0.578063	0.751421	0.269159	0.112297	0.0496198	0.511425	4	chrX	boruta
split_2	CD8_T_cell_Cytotoxic_GZMH_	0.826087	1	0.692308	0.847322	0.7301	0.913373	0.865385	0.769231	0.923077	0.882943	0.799331	0.93311	0.661765	0.735738	0.580119	0.839719	17	SLE	boruta
split_2	CD8_T_cell_Cytotoxic_GZMK_	0.673913	0.866667	0.5	0.669734	0.540986	0.778468	0.694231	0.598077	0.796154	0.704308	0.629181	0.813182	0.37613	0.398957	0.217254	0.610089	2	chrX	boruta
split_2	CD8_T_cell_Cytotoxic_GZMK_	0.891304	0.92	0.884615	0.848476	0.805184	0.956687	0.853846	0.809615	0.961538	0.846154	0.791866	0.966555	0.780115	0.701646	0.613941	0.916057	20	SLE	boruta
split_2	CD8_T_cell_MAIT	0.590909	0.875	0.291667	0.531661	0.419275	0.665501	0.625	0.533333	0.708333	0.659091	0.565657	0.734266	0.226562	0.362738	0.0967302	0.491112	6	chrX	boruta
split_2	CD8_T_cell_MAIT	0.840909	0.947368	0.75	0.768939	0.744113	0.931924	0.7875	0.7625	0.9375	0.790483	0.756016	0.94113	0.685714	0.595182	0.547723	0.872278	18	SLE	boruta
split_2	CD8_T_cell_Naive	0.826087	0.95	0.730769	0.826749	0.734161	0.913373	0.828846	0.757404	0.917308	0.815426	0.7644	0.916388	0.657993	0.652691	0.523501	0.828268	12	SLE	boruta
split_2	Classical_monocyte	0.73913	0.818182	0.692308	0.73913	0.631318	0.845882	0.734615	0.640385	0.842308	0.722151	0.651218	0.846154	0.481203	0.469231	0.285191	0.68937	3	chrX	boruta
split_2	Classical_monocyte	0.913043	0.923077	0.923077	0.889862	0.845807	0.978187	0.880769	0.836538	0.975	0.850652	0.818611	0.966555	0.823077	0.782114	0.68927	0.95646	22	SLE	boruta
split_2	Conventional_DC	0.565217	0.75	0.346154	0.46683	0.420468	0.659557	0.534615	0.501923	0.7	0.584372	0.566173	0.730383	0.181495	0.0804582	0.0053082	0.453089	1	chrX	boruta
split_2	Conventional_DC	0.804348	1	0.653846	0.847322	0.704949	0.891561	0.865385	0.75	0.903846	0.882943	0.782609	0.916388	0.621572	0.735738	0.550482	0.803837	12	SLE	boruta
split_2	Lymphocyte	0.608696	0.6	0.923077	0.431002	0.431002	0.645992	0.486538	0.478558	0.65	0.558684	0.554916	0.65	0.133891	-0.0540545	-0.0792594	0.398167	7	chrX	boruta
split_2	Lymphocyte	0.804348	0.947368	0.692308	0.718059	0.709958	0.891561	0.726923	0.738462	0.903846	0.724956	0.74818	0.912974	0.617375	0.45168	0.489809	0.803837	22	SLE	boruta
split_2	natural_killer_cell	0.586957	0.684211	0.5	0.696805	0.457652	0.695652	0.701923	0.478846	0.713462	0.700897	0.555407	0.715942	0.192237	0.400775	-0.0447399	0.433647	8	chrX	boruta
split_2	natural_killer_cell	0.804348	0.869565	0.769231	0.804816	0.716434	0.891769	0.803846	0.721154	0.898077	0.787157	0.714465	0.896321	0.608696	0.604792	0.438529	0.789352	32	SLE	boruta
split_2	NK_cell_Bright	0.73913	0.75	0.807692	0.845807	0.625531	0.845807	0.836538	0.615385	0.836538	0.807404	0.630954	0.815426	0.463035	0.691262	0.237004	0.68927	8	chrX	boruta
split_2	NK_cell_Bright	0.826087	1	0.692308	0.869565	0.7301	0.913373	0.884615	0.769231	0.923077	0.899666	0.799331	0.93311	0.661765	0.769231	0.580119	0.839719	21	SLE	boruta
split_2	NK_cell_Dim	0.73913	0.791667	0.730769	0.761441	0.631308	0.845807	0.759615	0.632692	0.836731	0.745819	0.645485	0.829738	0.475285	0.516752	0.263117	0.691262	6	chrX	boruta
split_2	NK_cell_Dim	0.782609	1	0.615385	0.869565	0.679041	0.869565	0.884615	0.730769	0.884615	0.899666	0.765886	0.899666	0.581818	0.769231	0.52105	0.769231	22	SLE	boruta
split_2	Non_classical_monocyte	0.73913	0.9375	0.576923	0.734161	0.624376	0.826087	0.763462	0.672788	0.846154	0.779996	0.697476	0.866221	0.498182	0.548439	0.388881	0.703211	3	chrX	boruta
split_2	Non_classical_monocyte	0.891304	0.956522	0.846154	0.956522	0.804815	0.956687	0.955769	0.823077	0.961538	0.946295	0.829735	0.966555	0.782609	0.911538	0.646675	0.916057	19	SLE	boruta
split_2	Plasmablast	0.410256	0	0	0.238695	0.238695	0.238695	0.5	0.5	0.5	0.589744	0.589744	0.589744	0	0	0	0	3	chrX	boruta
split_2	Plasmablast	0.717949	0.833333	0.652174	0.69475	0.591363	0.844357	0.701087	0.61413	0.847962	0.720002	0.656856	0.852183	0.44358	0.395773	0.229976	0.691751	9	SLE	boruta
split_2	Plasmacytoid_DC	0.543478	0.727273	0.307692	0.587338	0.387575	0.629411	0.642308	0.482692	0.673077	0.668339	0.557692	0.698997	0.145133	0.321314	-0.0450505	0.398957	7	chrX	boruta
split_2	Plasmacytoid_DC	0.73913	0.888889	0.615385	0.652174	0.633189	0.826746	0.663462	0.663462	0.846154	0.671823	0.679673	0.862598	0.492647	0.326923	0.343792	0.703211	17	SLE	boruta
split_2	Progenitor_cell	0.65	0.64	0.761905	0.625235	0.514213	0.769923	0.625313	0.517544	0.76817	0.602381	0.533974	0.711172	0.291139	0.250313	0.0367359	0.550746	2	chrX	boruta
split_2	Progenitor_cell	0.775	0.8	0.761905	0.671936	0.65	0.875078	0.680451	0.656642	0.878446	0.653571	0.634127	0.864299	0.55	0.367884	0.323153	0.759754	13	SLE	boruta
split_2	B_cell_Atypical	0.6	0.62963	0.68	0.597166	0.482634	0.71024	0.59	0.475	0.705	0.605926	0.543651	0.688718	0.181818	0.182574	-0.051245	0.412482	5	chrX	boruta
split_2	B_cell_Atypical	0.666667	0.916667	0.44	0.499521	0.516372	0.772222	0.595	0.6	0.79	0.627937	0.627937	0.804444	0.366197	0.260494	0.260494	0.601074	10	SLE	boruta
split_2	B_cell_Memory	0.717391	0.76	0.730769	0.783437	0.608696	0.826087	0.784615	0.607692	0.823077	0.77146	0.627648	0.802933	0.428298	0.564902	0.213747	0.646154	4	chrX	boruta
split_2	B_cell_Memory	0.717391	0.809524	0.653846	0.695652	0.608696	0.826087	0.707692	0.613462	0.828846	0.709699	0.632487	0.829783	0.441121	0.415385	0.225197	0.652691	17	SLE	boruta
split_2	B_cell_Naive	0.630435	0.714286	0.576923	0.653499	0.517842	0.740119	0.651923	0.519231	0.751923	0.658793	0.574972	0.74818	0.269159	0.301536	0.0381691	0.503846	2	chrX	boruta
split_2	B_cell_Naive	0.804348	0.904762	0.730769	0.870062	0.71377	0.891769	0.873077	0.726923	0.898077	0.862598	0.724956	0.899666	0.613084	0.74048	0.45168	0.789352	14	SLE	boruta
split_2	B_cell	0.622222	0.681818	0.6	0.550265	0.511039	0.734127	0.57	0.515	0.74	0.595817	0.563175	0.728254	0.246305	0.143486	0.0298807	0.478091	6	chrX	boruta
split_2	B_cell	0.755556	1	0.56	0.796416	0.640693	0.843367	0.82	0.7	0.86	0.84	0.733333	0.875556	0.530806	0.664364	0.478091	0.730297	13	SLE	boruta
split_2	CD4_positive,_alpha_beta_T_cell	0.673913	0.761905	0.615385	0.576092	0.561924	0.783432	0.611538	0.569231	0.790385	0.636343	0.603527	0.783293	0.35514	0.235901	0.137409	0.576353	4	chrX	boruta
split_2	CD4_positive,_alpha_beta_T_cell	0.782609	0.807692	0.807692	0.826087	0.67459	0.870062	0.823077	0.671058	0.873173	0.802933	0.668687	0.863036	0.557692	0.646154	0.340674	0.75193	19	SLE	boruta
split_2	CD4_T_cell_Effector_Memory	0.695652	0.8	0.615385	0.674684	0.581664	0.80481	0.682692	0.594231	0.809615	0.686256	0.619844	0.813174	0.401487	0.363641	0.187562	0.613941	2	chrX	boruta
split_2	CD4_T_cell_Effector_Memory	0.782609	0.9	0.692308	0.760078	0.685117	0.870062	0.776923	0.701923	0.884615	0.780672	0.709699	0.882943	0.572491	0.557612	0.415385	0.769231	12	SLE	boruta
split_2	CD4_T_cell_Naive	0.695652	0.928571	0.5	0.605918	0.565835	0.780962	0.667308	0.634615	0.807692	0.697476	0.664809	0.832776	0.420863	0.388881	0.321314	0.640513	5	chrX	boruta
split_2	CD4_T_cell_Naive	0.782609	0.785714	0.846154	0.713642	0.672648	0.869565	0.703846	0.665192	0.867308	0.693576	0.664878	0.847762	0.552529	0.418707	0.333018	0.740593	17	SLE	boruta
split_2	CD4_T_cell_Treg	0.652174	0.666667	0.769231	0.761441	0.530789	0.76006	0.759615	0.521154	0.753846	0.745819	0.575898	0.728866	0.275591	0.516752	0.0447399	0.516752	4	chrX	boruta
split_2	CD4_T_cell_Treg	0.826087	0.846154	0.846154	0.870059	0.733954	0.913043	0.878846	0.726923	0.911538	0.879675	0.714465	0.896321	0.646154	0.75193	0.464901	0.824319	16	SLE	boruta
split_2	CD8_positive,_alpha_beta_T_cell	0.782609	0.735294	0.961538	0.763908	0.658967	0.866977	0.75	0.655769	0.855769	0.722222	0.65433	0.823021	0.53629	0.600925	0.38829	0.754155	7	chrX	boruta
split_2	CD8_positive,_alpha_beta_T_cell	0.782609	0.863636	0.730769	0.760078	0.674684	0.870059	0.776923	0.688462	0.878846	0.780672	0.693144	0.879675	0.567669	0.557612	0.379486	0.75193	16	SLE	boruta
split_2	CD8_T_cell_Cytotoxic_GZMH_	0.673913	0.73913	0.653846	0.693279	0.565217	0.783432	0.684615	0.569231	0.790385	0.679885	0.603527	0.776415	0.347826	0.375046	0.137409	0.576353	4	chrX	boruta
split_2	CD8_T_cell_Cytotoxic_GZMH_	0.847826	0.913043	0.807692	0.870059	0.760078	0.934939	0.878846	0.771154	0.936538	0.879675	0.761063	0.93311	0.695652	0.75193	0.539719	0.868909	17	SLE	boruta
split_2	CD8_T_cell_Cytotoxic_GZMK_	0.521739	0.833333	0.192308	0.379523	0.338043	0.565835	0.532692	0.5	0.653846	0.586538	0.565217	0.684075	0.127586	0.115033	0	0.371574	2	chrX	boruta
split_2	CD8_T_cell_Cytotoxic_GZMK_	0.826087	0.846154	0.846154	0.845807	0.737096	0.913043	0.836538	0.728846	0.911538	0.807404	0.71479	0.896321	0.646154	0.691262	0.464901	0.824319	20	SLE	boruta
split_2	CD8_T_cell_MAIT	0.727273	0.8	0.666667	0.794926	0.612637	0.840493	0.804167	0.620833	0.841667	0.792863	0.620614	0.828072	0.459016	0.611527	0.242935	0.681208	6	chrX	boruta
split_2	CD8_T_cell_MAIT	0.863636	0.875	0.875	0.88654	0.772727	0.954258	0.891667	0.770833	0.95	0.88456	0.740372	0.94113	0.725	0.780897	0.543339	0.908333	18	SLE	boruta
split_2	CD8_T_cell_Naive	0.804348	0.869565	0.769231	0.891564	0.71377	0.891769	0.892308	0.715385	0.898077	0.879064	0.709699	0.896321	0.608696	0.78087	0.433647	0.789352	12	SLE	boruta
split_2	Classical_monocyte	0.717391	0.882353	0.576923	0.757805	0.605731	0.826087	0.782692	0.642308	0.840385	0.796577	0.658505	0.849498	0.453382	0.58066	0.294203	0.680769	3	chrX	boruta
split_2	Classical_monocyte	0.804348	1	0.653846	0.7301	0.704949	0.891561	0.769231	0.75	0.903846	0.799331	0.782609	0.916388	0.621572	0.580119	0.550482	0.803837	22	SLE	boruta
split_2	Conventional_DC	0.565217	0.607143	0.653846	0.594409	0.449311	0.68454	0.584615	0.442212	0.673269	0.611204	0.539961	0.67246	0.105058	0.182323	-0.121797	0.37233	1	chrX	boruta
split_2	Conventional_DC	0.804348	0.947368	0.692308	0.75458	0.709958	0.891561	0.788462	0.738462	0.903846	0.816054	0.74818	0.916388	0.617375	0.610089	0.489809	0.803837	12	SLE	boruta
split_2	Lymphocyte	0.543478	0.631579	0.461538	0.601242	0.405522	0.653499	0.630769	0.428846	0.675	0.650502	0.536101	0.679684	0.107209	0.272218	-0.146153	0.351067	7	chrX	boruta
split_2	Lymphocyte	0.804348	0.904762	0.730769	0.826746	0.71377	0.891769	0.834615	0.726923	0.903846	0.829735	0.730684	0.912974	0.613084	0.664141	0.456365	0.803837	22	SLE	boruta
split_2	natural_killer_cell	0.630435	0.655172	0.730769	0.733954	0.517722	0.73913	0.723077	0.507692	0.734615	0.707469	0.56904	0.722151	0.234834	0.464372	0.0156269	0.469231	8	chrX	boruta
split_2	natural_killer_cell	0.586957	0.652174	0.576923	0.54457	0.474308	0.696812	0.538462	0.475	0.707692	0.585284	0.553442	0.700897	0.173913	0.0765559	-0.0496198	0.415551	32	SLE	boruta
split_2	NK_cell_Bright	0.717391	0.69697	0.884615	0.769928	0.592608	0.801752	0.755769	0.586538	0.792308	0.728753	0.611526	0.766809	0.400802	0.577497	0.188151	0.639196	8	chrX	boruta
split_2	NK_cell_Bright	0.782609	0.9	0.692308	0.913375	0.672834	0.870062	0.917308	0.694231	0.884615	0.912974	0.704308	0.896321	0.572491	0.828268	0.398957	0.769231	21	SLE	boruta
split_2	NK_cell_Dim	0.782609	0.807692	0.807692	0.826087	0.675306	0.870062	0.823077	0.676731	0.873173	0.802933	0.67408	0.862598	0.557692	0.646154	0.350823	0.75193	6	chrX	boruta
split_2	NK_cell_Dim	0.73913	0.9375	0.576923	0.75458	0.624569	0.826746	0.788462	0.669231	0.846154	0.816054	0.697476	0.866221	0.498182	0.610089	0.388881	0.703211	22	SLE	boruta
split_2	Non_classical_monocyte	0.73913	1	0.538462	0.778468	0.624569	0.824769	0.807692	0.692308	0.846154	0.832776	0.732441	0.866221	0.503597	0.640513	0.46225	0.703211	3	chrX	boruta
split_2	Non_classical_monocyte	0.826087	0.875	0.807692	0.740124	0.73913	0.913375	0.740385	0.734615	0.917308	0.7307	0.728866	0.912974	0.65019	0.477113	0.469231	0.828268	19	SLE	boruta
split_2	Plasmablast	0.487179	0.636364	0.304348	0.424705	0.329599	0.595183	0.464674	0.408967	0.642799	0.574136	0.557733	0.683469	0.0487805	-0.073721	-0.198571	0.298144	3	chrX	boruta
split_2	Plasmablast	0.74359	0.842105	0.695652	0.744602	0.616939	0.847375	0.763587	0.63587	0.860054	0.780576	0.670967	0.869624	0.489529	0.522928	0.271739	0.708647	9	SLE	boruta
split_2	Plasmacytoid_DC	0.652174	0.666667	0.769231	0.585558	0.522141	0.757697	0.576923	0.515385	0.748077	0.607333	0.57292	0.728866	0.275591	0.154892	0.0338758	0.512475	7	chrX	boruta
split_2	Plasmacytoid_DC	0.847826	0.913043	0.807692	0.913373	0.760078	0.934939	0.923077	0.759615	0.936538	0.93311	0.755853	0.93311	0.695652	0.839719	0.523501	0.868909	17	SLE	boruta
split_2	Progenitor_cell	0.65	0.64	0.761905	0.671905	0.514281	0.769923	0.670426	0.52005	0.76817	0.632937	0.535317	0.711172	0.291139	0.347446	0.040876	0.550689	2	chrX	boruta
split_2	Progenitor_cell	0.7	0.655172	0.904762	0.570952	0.552137	0.796931	0.570175	0.58396	0.794486	0.563889	0.570924	0.737619	0.386189	0.143066	0.195067	0.647486	13	SLE	boruta
split_2	B_cell_Atypical	0.577778	0.714286	0.4	0.353247	0.433457	0.681111	0.43	0.49	0.705	0.530667	0.550769	0.714444	0.189573	-0.167332	-0.0199833	0.438318	5	chrX	boruta
split_2	B_cell_Atypical	0.755556	0.791667	0.76	0.866667	0.644392	0.844906	0.865	0.64	0.855	0.841067	0.64212	0.838384	0.507463	0.73	0.28	0.711	10	SLE	boruta
split_2	B_cell_Memory	0.76087	0.714286	0.961538	0.71669	0.628019	0.840714	0.705769	0.625	0.825	0.689474	0.634468	0.787879	0.486815	0.494608	0.330773	0.699569	4	chrX	boruta
split_2	B_cell_Memory	0.891304	0.956522	0.846154	0.956687	0.805184	0.956687	0.961538	0.822981	0.961538	0.966555	0.815426	0.966555	0.782609	0.916057	0.646675	0.916057	17	SLE	boruta
split_2	B_cell_Naive	0.652174	0.647059	0.846154	0.604051	0.512811	0.749693	0.598077	0.515385	0.736538	0.618825	0.57292	0.714807	0.258065	0.227965	0.0338758	0.520841	2	chrX	boruta
split_2	B_cell_Naive	0.826087	0.909091	0.769231	0.891564	0.737154	0.913043	0.892308	0.745865	0.911538	0.879064	0.740347	0.916388	0.654135	0.78087	0.488564	0.823077	14	SLE	boruta
split_2	B_cell	0.777778	0.777778	0.84	0.822222	0.665526	0.887529	0.82	0.66	0.88	0.794489	0.653333	0.845079	0.545455	0.64	0.321937	0.774662	6	chrX	boruta
split_2	B_cell	0.8	1	0.64	0.843367	0.69579	0.888889	0.86	0.74	0.9	0.875556	0.768889	0.911111	0.61244	0.730297	0.53936	0.8	13	SLE	boruta
split_2	CD4_positive,_alpha_beta_T_cell	0.673913	0.866667	0.5	0.633189	0.54824	0.778468	0.686538	0.6	0.801923	0.713907	0.630092	0.816054	0.37613	0.421182	0.217254	0.613356	4	chrX	boruta
split_2	CD4_positive,_alpha_beta_T_cell	0.847826	0.806452	0.961538	0.869565	0.749693	0.933917	0.867308	0.736538	0.925	0.847762	0.714807	0.896552	0.681188	0.734615	0.536388	0.867396	19	SLE	boruta
split_2	CD4_T_cell_Effector_Memory	0.543478	0.727273	0.307692	0.432595	0.389924	0.640134	0.484615	0.47875	0.680769	0.558014	0.555407	0.699952	0.145133	-0.0338758	-0.0511699	0.398957	2	chrX	boruta
split_2	CD4_T_cell_Effector_Memory	0.869565	1	0.769231	0.869565	0.778468	0.935061	0.884615	0.807692	0.942308	0.899666	0.832776	0.949833	0.743494	0.769231	0.640513	0.877058	12	SLE	boruta
split_2	CD4_T_cell_Naive	0.630435	1	0.346154	0.501812	0.467432	0.704949	0.615385	0.596154	0.75	0.665552	0.648829	0.782609	0.315236	0.339683	0.306282	0.550482	5	chrX	boruta
split_2	CD4_T_cell_Naive	0.826087	0.78125	0.961538	0.840714	0.71669	0.911318	0.825	0.705769	0.9	0.787879	0.689474	0.866667	0.633466	0.715626	0.477629	0.824319	17	SLE	boruta
split_2	CD4_T_cell_Treg	0.608696	0.833333	0.384615	0.436569	0.453133	0.693347	0.546154	0.546154	0.730769	0.593884	0.592093	0.763434	0.263345	0.127397	0.103593	0.516542	4	chrX	boruta
split_2	CD4_T_cell_Treg	0.913043	0.892857	0.961538	0.843631	0.843631	0.978187	0.830769	0.830769	0.975	0.797173	0.797173	0.962963	0.821012	0.699569	0.691163	0.95646	16	SLE	boruta
split_2	CD8_positive,_alpha_beta_T_cell	0.826087	0.846154	0.846154	0.870059	0.718067	0.913043	0.878846	0.715385	0.911538	0.879675	0.707469	0.896321	0.646154	0.75193	0.428713	0.824319	7	chrX	boruta
split_2	CD8_positive,_alpha_beta_T_cell	0.826087	0.909091	0.769231	0.8037	0.737154	0.913375	0.821154	0.740385	0.917308	0.829783	0.740347	0.916388	0.654135	0.646675	0.488564	0.828268	16	SLE	boruta
split_2	CD8_T_cell_Cytotoxic_GZMH_	0.630435	0.764706	0.5	0.737154	0.512257	0.73913	0.757692	0.542308	0.751923	0.7644	0.588211	0.763434	0.285192	0.523501	0.0880705	0.51689	4	chrX	boruta
split_2	CD8_T_cell_Cytotoxic_GZMH_	0.891304	1	0.807692	0.869565	0.801841	0.956687	0.884615	0.826923	0.961538	0.899666	0.849498	0.966555	0.785047	0.769231	0.671512	0.916057	17	SLE	boruta
split_2	CD8_T_cell_Cytotoxic_GZMK_	0.630435	0.846154	0.423077	0.587338	0.485563	0.7301	0.642308	0.565385	0.752212	0.668339	0.604236	0.782609	0.300537	0.321314	0.142354	0.550482	2	chrX	boruta
split_2	CD8_T_cell_Cytotoxic_GZMK_	0.913043	0.958333	0.884615	0.956687	0.848186	0.978313	0.961538	0.853846	0.980769	0.966555	0.846154	0.983278	0.825095	0.916057	0.701646	0.956949	20	SLE	boruta
split_2	CD8_T_cell_MAIT	0.772727	0.9375	0.625	0.744113	0.665137	0.863636	0.766667	0.695833	0.875	0.771717	0.69697	0.886364	0.556452	0.560241	0.427599	0.759555	6	chrX	boruta
split_2	CD8_T_cell_MAIT	0.931818	0.92	0.958333	0.977213	0.862775	1	0.975	0.858333	1	0.96	0.821096	1	0.861925	0.954987	0.725797	1	18	SLE	boruta
split_2	CD8_T_cell_Naive	0.826087	0.821429	0.884615	0.76006	0.729606	0.912365	0.753846	0.717308	0.905769	0.736901	0.701035	0.895549	0.642023	0.511144	0.464901	0.828488	12	SLE	boruta
split_2	Classical_monocyte	0.73913	0.818182	0.692308	0.80481	0.631318	0.848186	0.815385	0.644231	0.853846	0.813346	0.653203	0.846154	0.481203	0.627758	0.290423	0.701646	3	chrX	boruta
split_2	Classical_monocyte	0.869565	0.916667	0.846154	0.870062	0.782609	0.935061	0.873077	0.784615	0.942308	0.862598	0.77146	0.946295	0.737643	0.74048	0.564902	0.877058	22	SLE	boruta
split_2	Conventional_DC	0.608696	0.6	0.923077	0.431002	0.431002	0.640537	0.486538	0.478846	0.636538	0.558684	0.555052	0.642231	0.133891	-0.0540545	-0.0792594	0.398167	1	chrX	boruta
split_2	Conventional_DC	0.782609	1	0.615385	0.595794	0.679041	0.869565	0.673077	0.730769	0.884615	0.715719	0.765886	0.899666	0.581818	0.432562	0.52105	0.769231	12	SLE	boruta
split_2	Lymphocyte	0.73913	0.791667	0.730769	0.610178	0.631308	0.847311	0.613462	0.632692	0.842308	0.632487	0.648053	0.831572	0.475285	0.225197	0.275432	0.691341	7	chrX	boruta
split_2	Lymphocyte	0.869565	0.954545	0.807692	0.891769	0.780962	0.935061	0.898077	0.796154	0.942308	0.896321	0.79699	0.949833	0.740602	0.789352	0.592308	0.877058	22	SLE	boruta
split_2	natural_killer_cell	0.73913	0.85	0.653846	0.718598	0.625699	0.847322	0.721154	0.638462	0.848077	0.715719	0.653104	0.849498	0.486989	0.438529	0.290161	0.701646	8	chrX	boruta
split_2	natural_killer_cell	0.76087	0.941176	0.615385	0.75458	0.659557	0.848186	0.788462	0.694231	0.865385	0.816054	0.713907	0.882943	0.537477	0.610089	0.421182	0.735738	32	SLE	boruta
split_2	NK_cell_Bright	0.826087	0.875	0.807692	0.824769	0.73913	0.913375	0.846154	0.734615	0.917308	0.866221	0.728866	0.912974	0.65019	0.703211	0.469231	0.828268	8	chrX	boruta
split_2	NK_cell_Bright	0.826087	1	0.692308	0.869565	0.7301	0.913373	0.884615	0.769231	0.923077	0.899666	0.799331	0.93311	0.661765	0.769231	0.580119	0.839719	21	SLE	boruta
split_2	NK_cell_Dim	0.673913	0.923077	0.461538	0.659557	0.534557	0.757805	0.705769	0.609615	0.788462	0.730383	0.64862	0.816054	0.382826	0.453089	0.286074	0.610089	6	chrX	boruta
split_2	NK_cell_Dim	0.869565	1	0.769231	0.824769	0.778468	0.935061	0.846154	0.807692	0.942308	0.866221	0.832776	0.949833	0.743494	0.703211	0.640513	0.877058	22	SLE	boruta
split_2	Non_classical_monocyte	0.76087	0.941176	0.615385	0.801841	0.645549	0.848186	0.826923	0.686538	0.865385	0.849498	0.713907	0.879838	0.537477	0.671512	0.421182	0.735738	3	chrX	boruta
split_2	Non_classical_monocyte	0.891304	0.92	0.884615	0.870062	0.805184	0.956687	0.873077	0.811442	0.961538	0.862598	0.799331	0.966555	0.780115	0.74048	0.627282	0.916057	19	SLE	boruta
split_2	Plasmablast	0.666667	0.678571	0.826087	0.523956	0.531863	0.775878	0.504076	0.516304	0.756929	0.591726	0.59777	0.751324	0.276748	0.0086881	0.0380693	0.57121	3	chrX	boruta
split_2	Plasmablast	0.820513	0.807692	0.913043	0.759175	0.705659	0.921453	0.737772	0.684783	0.90625	0.736065	0.698041	0.88493	0.618182	0.519803	0.409246	0.84071	9	SLE	boruta
split_2	Plasmacytoid_DC	0.652174	0.692308	0.692308	0.672809	0.537421	0.761441	0.665385	0.526923	0.765385	0.666419	0.578941	0.746099	0.292308	0.333018	0.055301	0.526235	7	chrX	boruta
split_2	Plasmacytoid_DC	0.826087	0.8	0.923077	0.815942	0.729606	0.911318	0.8	0.717308	0.9	0.764706	0.701035	0.879064	0.637795	0.677365	0.464901	0.824319	17	SLE	boruta
split_2	Progenitor_cell	0.6	0.608696	0.666667	0.514281	0.47005	0.724481	0.517544	0.472431	0.723058	0.533974	0.511905	0.679113	0.193955	0.0367359	-0.0553463	0.450864	2	chrX	boruta
split_2	Progenitor_cell	0.75	0.72	0.857143	0.698485	0.621154	0.849242	0.696742	0.620301	0.847118	0.655021	0.596429	0.797412	0.493671	0.397489	0.260133	0.710936	13	SLE	boruta
split_2	B_cell_Atypical	0.6	0.684211	0.52	0.536662	0.471929	0.721997	0.58	0.495	0.735	0.604786	0.553111	0.722524	0.213592	0.175412	-0.0100781	0.471723	5	chrX	boruta
split_2	B_cell_Atypical	0.755556	0.791667	0.76	0.711969	0.645503	0.864198	0.715	0.655	0.855	0.703232	0.649048	0.838518	0.507463	0.427443	0.31601	0.73	10	SLE	boruta
split_2	B_cell_Memory	0.73913	0.769231	0.769231	0.718067	0.631318	0.826749	0.715385	0.626923	0.834615	0.707559	0.640191	0.815426	0.469231	0.428713	0.252634	0.664141	4	chrX	boruta
split_2	B_cell_Memory	0.869565	0.916667	0.846154	0.869565	0.783432	0.936117	0.867308	0.790385	0.942692	0.847762	0.776415	0.946295	0.737643	0.734615	0.576353	0.878782	17	SLE	boruta
split_2	B_cell_Naive	0.652174	0.692308	0.692308	0.588721	0.541707	0.760061	0.588462	0.532596	0.754135	0.615385	0.582024	0.743423	0.292308	0.175412	0.0656147	0.516752	2	chrX	boruta
split_2	B_cell_Naive	0.826087	0.909091	0.769231	0.783432	0.737005	0.913043	0.790385	0.740385	0.911538	0.783293	0.736836	0.916388	0.654135	0.576353	0.487991	0.823139	14	SLE	boruta
split_2	B_cell	0.733333	0.782609	0.72	0.734127	0.622222	0.822751	0.735	0.625	0.835	0.719034	0.631313	0.820952	0.465347	0.467205	0.248513	0.674057	6	chrX	boruta
split_2	B_cell	0.777778	0.857143	0.72	0.844906	0.666667	0.867063	0.85	0.68	0.875	0.838384	0.68	0.873016	0.558824	0.695837	0.365148	0.747018	13	SLE	boruta
split_2	CD4_positive,_alpha_beta_T_cell	0.73913	0.85	0.653846	0.718598	0.625699	0.848186	0.721154	0.65	0.848077	0.715719	0.664636	0.846405	0.486989	0.438529	0.307777	0.701646	4	chrX	boruta
split_2	CD4_positive,_alpha_beta_T_cell	0.826087	0.95	0.730769	0.8037	0.7301	0.913373	0.821154	0.751827	0.917596	0.829783	0.755631	0.91705	0.657993	0.646675	0.515907	0.828841	19	SLE	boruta
split_2	CD4_T_cell_Effector_Memory	0.586957	0.577778	1	0.45537	0.408213	0.539382	0.525	0.5	0.575	0.577778	0.565217	0.604651	0.0561555	0.169967	0	0.301161	2	chrX	boruta
split_2	CD4_T_cell_Effector_Memory	0.869565	1	0.769231	0.869565	0.778468	0.935061	0.884615	0.807692	0.942308	0.899666	0.832776	0.949833	0.743494	0.769231	0.640513	0.877058	12	SLE	boruta
split_2	CD4_T_cell_Naive	0.73913	1	0.538462	0.652281	0.624569	0.824769	0.711538	0.692308	0.846154	0.749164	0.732441	0.866221	0.503597	0.491689	0.46225	0.703211	5	chrX	boruta
split_2	CD4_T_cell_Naive	0.804348	0.869565	0.769231	0.733954	0.71377	0.891769	0.723077	0.715288	0.898077	0.707469	0.709699	0.896321	0.608696	0.464372	0.4334	0.789352	17	SLE	boruta
split_2	CD4_T_cell_Treg	0.630435	0.714286	0.576923	0.585589	0.518111	0.740119	0.6	0.525	0.746442	0.624714	0.578063	0.745819	0.269159	0.20136	0.0496198	0.503846	4	chrX	boruta
split_2	CD4_T_cell_Treg	0.826087	1	0.692308	0.891561	0.7301	0.913373	0.903846	0.769231	0.923077	0.916388	0.799331	0.93311	0.661765	0.803837	0.580119	0.839719	16	SLE	boruta
split_2	CD8_positive,_alpha_beta_T_cell	0.804348	0.869565	0.769231	0.866977	0.716456	0.891769	0.855769	0.726923	0.903846	0.823021	0.722151	0.896321	0.608696	0.740593	0.45168	0.803837	7	chrX	boruta
split_2	CD8_positive,_alpha_beta_T_cell	0.782609	0.9	0.692308	0.783432	0.689855	0.870059	0.790385	0.705577	0.878846	0.783293	0.707559	0.882943	0.572491	0.576353	0.415385	0.75193	16	SLE	boruta
split_2	CD8_T_cell_Cytotoxic_GZMH_	0.652174	0.666667	0.769231	0.581476	0.522141	0.757815	0.571154	0.515385	0.748365	0.603621	0.57292	0.7307	0.275591	0.146153	0.0338758	0.512475	4	chrX	boruta
split_2	CD8_T_cell_Cytotoxic_GZMH_	0.804348	1	0.653846	0.824769	0.704949	0.891561	0.846154	0.75	0.903846	0.866221	0.782609	0.916388	0.621572	0.703211	0.550482	0.803837	17	SLE	boruta
split_2	CD8_T_cell_Cytotoxic_GZMK_	0.717391	0.809524	0.653846	0.757805	0.605731	0.826746	0.782692	0.619135	0.840385	0.796577	0.637793	0.831632	0.441121	0.58066	0.238462	0.680769	2	chrX	boruta
split_2	CD8_T_cell_Cytotoxic_GZMK_	0.869565	1	0.769231	0.824769	0.778468	0.935061	0.846154	0.807692	0.942308	0.866221	0.832776	0.949833	0.743494	0.703211	0.640513	0.877058	20	SLE	boruta
split_2	CD8_T_cell_MAIT	0.727273	0.833333	0.625	0.679809	0.609426	0.839175	0.675	0.625	0.841667	0.655594	0.625668	0.829906	0.463415	0.354459	0.255655	0.689543	6	chrX	boruta
split_2	CD8_T_cell_MAIT	0.863636	0.875	0.875	0.931924	0.772727	0.954258	0.933333	0.775	0.95	0.922266	0.740857	0.94113	0.725	0.863971	0.547723	0.908333	18	SLE	boruta
split_2	CD8_T_cell_Naive	0.782609	0.9	0.692308	0.716456	0.689855	0.890967	0.732692	0.701923	0.886827	0.73561	0.709699	0.896321	0.572491	0.468549	0.415385	0.77846	12	SLE	boruta
split_2	Classical_monocyte	0.73913	0.818182	0.692308	0.693347	0.631308	0.847366	0.713462	0.638462	0.853846	0.7199	0.65106	0.846405	0.481203	0.433647	0.275601	0.701646	3	chrX	boruta
split_2	Classical_monocyte	0.891304	0.92	0.884615	0.956687	0.804816	0.956687	0.961538	0.809615	0.961538	0.966555	0.791866	0.966555	0.780115	0.916057	0.613941	0.916057	22	SLE	boruta
split_2	Conventional_DC	0.586957	0.606061	0.769231	0.42963	0.448823	0.677899	0.453846	0.451923	0.667308	0.543607	0.543008	0.663634	0.124248	-0.127397	-0.104028	0.372934	1	chrX	boruta
split_2	Conventional_DC	0.804348	0.947368	0.692308	0.891561	0.704949	0.891564	0.903846	0.732596	0.903846	0.916388	0.746894	0.913145	0.617375	0.803837	0.484814	0.803837	12	SLE	boruta
split_2	Lymphocyte	0.652174	0.777778	0.538462	0.620714	0.53147	0.760078	0.655769	0.561538	0.776923	0.673579	0.599843	0.780672	0.323529	0.329448	0.126402	0.557612	7	chrX	boruta
split_2	Lymphocyte	0.782609	0.944444	0.653846	0.782609	0.679041	0.870059	0.796154	0.713365	0.884615	0.79699	0.730383	0.899666	0.577206	0.592308	0.453089	0.769231	22	SLE	boruta
split_2	natural_killer_cell	0.586957	0.577778	1	0.408213	0.408213	0.539382	0.5	0.5	0.575	0.565217	0.565217	0.604651	0.0561555	0	0	0.301161	8	chrX	boruta
split_2	natural_killer_cell	0.782609	0.9	0.692308	0.780962	0.685117	0.870062	0.801923	0.701923	0.884615	0.813174	0.709699	0.895549	0.572491	0.613356	0.415385	0.769231	32	SLE	boruta
split_2	NK_cell_Bright	0.73913	0.733333	0.846154	0.803685	0.622253	0.845807	0.798077	0.615385	0.836538	0.776415	0.630388	0.807404	0.456693	0.600207	0.237004	0.691262	8	chrX	boruta
split_2	NK_cell_Bright	0.869565	0.954545	0.807692	0.891769	0.782609	0.935061	0.898077	0.796154	0.942308	0.896321	0.79699	0.949833	0.740602	0.789352	0.600207	0.877058	21	SLE	boruta
split_2	NK_cell_Dim	0.76087	0.8	0.769231	0.757697	0.652174	0.868548	0.748077	0.647981	0.861538	0.728866	0.65571	0.846473	0.516252	0.509559	0.301074	0.734465	6	chrX	boruta
split_2	NK_cell_Dim	0.76087	0.941176	0.615385	0.704949	0.649339	0.848186	0.75	0.692308	0.865385	0.782609	0.713907	0.882943	0.537477	0.550482	0.421182	0.735738	22	SLE	boruta
split_2	Non_classical_monocyte	0.782609	0.833333	0.769231	0.8037	0.675306	0.870062	0.821154	0.676923	0.878846	0.829783	0.67893	0.879064	0.562738	0.646675	0.363	0.75193	3	chrX	boruta
split_2	Non_classical_monocyte	0.891304	0.956522	0.846154	0.913373	0.805184	0.956687	0.923077	0.821154	0.961538	0.93311	0.818611	0.966555	0.782609	0.839719	0.646675	0.916057	19	SLE	boruta
split_2	Plasmablast	0.589744	0.64	0.695652	0.592486	0.457594	0.7164	0.585598	0.441576	0.703804	0.636566	0.563295	0.712587	0.135734	0.168916	-0.123634	0.412113	3	chrX	boruta
split_2	Plasmablast	0.74359	0.782609	0.782609	0.664836	0.618425	0.848317	0.650815	0.610054	0.853261	0.677397	0.649944	0.849976	0.470109	0.304963	0.229976	0.709893	9	SLE	boruta
split_2	Plasmacytoid_DC	0.695652	0.666667	0.923077	0.704183	0.560934	0.769928	0.692308	0.567308	0.755769	0.681768	0.600642	0.728866	0.342857	0.423448	0.175655	0.600436	7	chrX	boruta
split_2	Plasmacytoid_DC	0.826087	0.909091	0.769231	0.84819	0.718059	0.913373	0.848077	0.738462	0.917308	0.831572	0.73561	0.916388	0.654135	0.692831	0.477113	0.828268	17	SLE	boruta
split_2	Progenitor_cell	0.7	0.846154	0.52381	0.695455	0.568	0.8	0.706767	0.606516	0.809524	0.682143	0.59246	0.802249	0.410319	0.426562	0.225282	0.659124	2	chrX	boruta
split_2	Progenitor_cell	0.65	0.62069	0.857143	0.5875	0.504842	0.746164	0.591479	0.517419	0.744361	0.576499	0.533908	0.692143	0.283887	0.195067	0.0365378	0.535367	13	SLE	boruta
split_2	B_cell_Atypical	0.711111	0.714286	0.8	0.711969	0.592593	0.819032	0.715	0.585	0.81025	0.703232	0.602452	0.783704	0.406091	0.427443	0.176472	0.64	14	chrX	enet
split_2	B_cell_Atypical	0.733333	0.882353	0.6	0.705934	0.619398	0.843367	0.73	0.65	0.855	0.734444	0.657076	0.857778	0.480769	0.477512	0.311877	0.71	9	SLE	enet
split_2	B_cell_Memory	0.695652	0.8	0.615385	0.674684	0.581664	0.80481	0.682692	0.594231	0.815385	0.686256	0.622416	0.813346	0.401487	0.363641	0.198331	0.627758	13	chrX	enet
split_2	B_cell_Memory	0.73913	0.85	0.653846	0.761435	0.62545	0.826749	0.771154	0.638462	0.840385	0.76732	0.657631	0.846405	0.486989	0.539719	0.290423	0.680769	9	SLE	enet
split_2	B_cell_Naive	0.5	0.8	0.153846	0.352355	0.298525	0.534557	0.482692	0.482692	0.628846	0.557692	0.560201	0.665552	0.0926244	-0.0509525	-0.0509525	0.339683	2	chrX	enet
split_2	B_cell_Naive	0.804348	1	0.653846	0.778468	0.704949	0.891561	0.807692	0.75	0.903846	0.832776	0.782609	0.916388	0.621572	0.640513	0.550482	0.803837	10	SLE	enet
split_2	B_cell	0.755556	0.85	0.68	0.732543	0.645147	0.844906	0.745	0.665	0.86	0.738947	0.665398	0.855333	0.517073	0.492967	0.337514	0.73	2	chrX	enet
split_2	B_cell	0.755556	0.9375	0.6	0.681111	0.640693	0.844444	0.71	0.69	0.86	0.717333	0.700317	0.875556	0.526316	0.442719	0.407872	0.730297	11	SLE	enet
split_2	CD4_positive,_alpha_beta_T_cell	0.73913	0.75	0.807692	0.605645	0.629001	0.845807	0.596154	0.620865	0.836538	0.618968	0.634369	0.815594	0.463035	0.195336	0.243608	0.68927	2	chrX	enet
split_2	CD4_positive,_alpha_beta_T_cell	0.804348	0.774194	0.923077	0.795203	0.697137	0.889862	0.780769	0.686538	0.880769	0.750177	0.676445	0.850652	0.590099	0.618233	0.418707	0.793116	6	SLE	enet
split_2	CD4_T_cell_Effector_Memory	0.630435	0.615385	0.923077	0.612589	0.471441	0.688465	0.625	0.505769	0.680769	0.634146	0.568068	0.671427	0.18711	0.398167	0.0280484	0.451787	2	chrX	enet
split_2	CD4_T_cell_Effector_Memory	0.869565	0.954545	0.807692	0.891769	0.783391	0.935061	0.898077	0.801923	0.942308	0.896321	0.799331	0.949833	0.740602	0.789352	0.613356	0.877058	9	SLE	enet
split_2	CD4_T_cell_Naive	0.73913	0.888889	0.615385	0.718598	0.625699	0.826746	0.721154	0.655769	0.846154	0.715719	0.673579	0.862598	0.492647	0.438529	0.329448	0.703211	2	chrX	enet
split_2	CD4_T_cell_Naive	0.847826	0.827586	0.923077	0.866977	0.754277	0.933917	0.855769	0.742308	0.925	0.823021	0.721545	0.896552	0.684932	0.740593	0.512475	0.867396	5	SLE	enet
split_2	CD4_T_cell_Treg	0.565217	0.636364	0.538462	0.480248	0.454723	0.675306	0.475	0.455769	0.682788	0.553442	0.545151	0.686386	0.135338	-0.0496198	-0.0877058	0.364829	2	chrX	enet
split_2	CD4_T_cell_Treg	0.891304	0.92	0.884615	0.978187	0.805184	0.956687	0.975	0.809615	0.961538	0.962963	0.799331	0.962963	0.780115	0.95646	0.613941	0.916057	10	SLE	enet
split_2	CD8_positive,_alpha_beta_T_cell	0.73913	0.888889	0.615385	0.869565	0.633095	0.826749	0.884615	0.669231	0.846154	0.899666	0.684075	0.863036	0.492647	0.769231	0.355696	0.703211	2	chrX	enet
split_2	CD8_positive,_alpha_beta_T_cell	0.869565	0.954545	0.807692	0.978313	0.782609	0.935061	0.980769	0.801731	0.942308	0.983278	0.79699	0.949833	0.740602	0.956949	0.604562	0.877058	11	SLE	enet
split_2	CD8_T_cell_Cytotoxic_GZMH_	0.673913	0.666667	0.846154	0.723913	0.54468	0.76006	0.711538	0.548077	0.75	0.695062	0.590075	0.728866	0.308617	0.477629	0.120156	0.554755	2	chrX	enet
split_2	CD8_T_cell_Cytotoxic_GZMH_	0.804348	0.869565	0.769231	0.805184	0.696812	0.891769	0.809615	0.709519	0.898077	0.799331	0.707559	0.896321	0.608696	0.613941	0.421913	0.789352	14	SLE	enet
split_2	CD8_T_cell_Cytotoxic_GZMK_	0.630435	0.666667	0.692308	0.566864	0.51225	0.73913	0.569231	0.501923	0.734615	0.603527	0.566165	0.722151	0.243714	0.137409	0.0040032	0.469231	2	chrX	enet
split_2	CD8_T_cell_Cytotoxic_GZMK_	0.847826	0.952381	0.769231	0.891769	0.757805	0.934939	0.898077	0.771154	0.936538	0.896321	0.779996	0.93311	0.699065	0.789352	0.550482	0.868909	12	SLE	enet
split_2	CD8_T_cell_MAIT	0.568182	0.647059	0.458333	0.567066	0.437321	0.681818	0.575	0.4625	0.695833	0.588517	0.528409	0.689755	0.153846	0.150787	-0.0759555	0.405414	2	chrX	enet
split_2	CD8_T_cell_MAIT	0.886364	0.952381	0.833333	1	0.795772	0.95464	1	0.8125	0.958333	1	0.809269	0.962121	0.773663	1	0.63901	0.912871	12	SLE	enet
split_2	CD8_T_cell_Naive	0.586957	0.818182	0.346154	0.652281	0.436569	0.679041	0.711538	0.521154	0.71375	0.749164	0.576714	0.746894	0.226549	0.491689	0.055333	0.484814	1	chrX	enet
split_2	CD8_T_cell_Naive	0.695652	0.833333	0.576923	0.689855	0.576092	0.801841	0.719231	0.6	0.809615	0.732023	0.628957	0.813346	0.408088	0.456365	0.216459	0.627758	5	SLE	enet
split_2	Classical_monocyte	0.630435	0.764706	0.5	0.645549	0.505184	0.740119	0.675	0.536538	0.757692	0.688859	0.584634	0.7644	0.285192	0.364292	0.0802631	0.523501	1	chrX	enet
split_2	Classical_monocyte	0.869565	0.954545	0.807692	0.826746	0.780962	0.956522	0.834615	0.796154	0.955769	0.829735	0.79699	0.949833	0.740602	0.664141	0.592308	0.911538	14	SLE	enet
split_2	Conventional_DC	0.652174	0.638889	0.884615	0.697216	0.496752	0.729606	0.686538	0.511442	0.717308	0.676445	0.570903	0.701035	0.24898	0.43358	0.0332995	0.494608	10	chrX	enet
split_2	Conventional_DC	0.869565	0.954545	0.807692	0.935061	0.783432	0.956522	0.942308	0.801923	0.955769	0.949833	0.79699	0.949833	0.740602	0.877058	0.604792	0.911538	12	SLE	enet
split_2	Lymphocyte	0.73913	0.769231	0.769231	0.718598	0.631308	0.847311	0.721154	0.626923	0.842308	0.715719	0.640191	0.818991	0.469231	0.438529	0.252634	0.691262	22	chrX	enet
split_2	Lymphocyte	0.782609	0.944444	0.653846	0.716456	0.679041	0.869565	0.732692	0.713462	0.884615	0.73561	0.731957	0.896321	0.577206	0.468549	0.456365	0.769231	17	SLE	enet
split_2	natural_killer_cell	0.717391	0.882353	0.576923	0.689855	0.587338	0.824769	0.719231	0.636538	0.834904	0.732023	0.658461	0.846405	0.453382	0.456365	0.294014	0.671975	21	chrX	enet
split_2	natural_killer_cell	0.782609	1	0.615385	0.847322	0.679041	0.869565	0.865385	0.730769	0.884615	0.882943	0.765886	0.899666	0.581818	0.735738	0.52105	0.769231	15	SLE	enet
split_2	NK_cell_Bright	0.630435	0.714286	0.576923	0.653491	0.512629	0.740124	0.657692	0.523077	0.751923	0.664944	0.577258	0.74818	0.269159	0.312986	0.0488071	0.503846	2	chrX	enet
split_2	NK_cell_Bright	0.847826	1	0.730769	0.913373	0.75458	0.935061	0.923077	0.788462	0.942308	0.93311	0.816054	0.949833	0.702403	0.839719	0.610089	0.877058	13	SLE	enet
split_2	NK_cell_Dim	0.695652	0.833333	0.576923	0.826746	0.576092	0.8037	0.834615	0.605769	0.815385	0.829735	0.63014	0.815426	0.408088	0.664141	0.217254	0.628396	2	chrX	enet
split_2	NK_cell_Dim	0.869565	1	0.769231	0.913373	0.801841	0.935061	0.923077	0.826923	0.942308	0.93311	0.849498	0.949833	0.743494	0.839719	0.671512	0.877058	14	SLE	enet
split_2	Non_classical_monocyte	0.630435	0.846154	0.423077	0.652281	0.495635	0.734161	0.711538	0.565385	0.763462	0.749164	0.604236	0.782609	0.300537	0.491689	0.16091	0.550482	1	chrX	enet
split_2	Non_classical_monocyte	0.869565	1	0.769231	0.869565	0.778468	0.935061	0.884615	0.807692	0.942308	0.899666	0.832776	0.949833	0.743494	0.769231	0.640513	0.877058	12	SLE	enet
split_2	Plasmablast	0.615385	0.75	0.521739	0.795682	0.48448	0.744602	0.816576	0.51087	0.763587	0.834219	0.595095	0.780576	0.254777	0.628053	0.0213931	0.522928	2	chrX	enet
split_2	Plasmablast	0.641026	0.846154	0.478261	0.61792	0.498577	0.744602	0.626359	0.558424	0.782609	0.664623	0.6233	0.816541	0.322581	0.249352	0.131627	0.589674	10	SLE	enet
split_2	Plasmacytoid_DC	0.521739	0.7	0.269231	0.468323	0.36599	0.601242	0.498077	0.471154	0.653846	0.564277	0.552676	0.684075	0.109155	-0.0040032	-0.0693375	0.355933	2	chrX	enet
split_2	Plasmacytoid_DC	0.847826	0.952381	0.769231	0.891769	0.757805	0.934939	0.898077	0.776923	0.936538	0.896321	0.780672	0.93311	0.699065	0.789352	0.557612	0.868909	10	SLE	enet
split_2	Progenitor_cell	0.625	0.75	0.428571	0.639258	0.47903	0.724484	0.659148	0.516165	0.738095	0.6413	0.533765	0.734623	0.264706	0.339362	0.0423278	0.529971	18	chrX	enet
split_2	Progenitor_cell	0.625	0.588235	0.952381	0.432609	0.448433	0.684	0.505013	0.528822	0.689223	0.527513	0.539801	0.642775	0.222798	0.0166875	0.0889347	0.4842	8	SLE	enet
split_2	B_cell_Atypical	0.6	0.64	0.64	0.592593	0.482634	0.711686	0.585	0.475	0.71	0.602452	0.543651	0.695556	0.19	0.176472	-0.051245	0.41833	14	chrX	enet
split_2	B_cell_Atypical	0.711111	0.928571	0.52	0.721997	0.582996	0.798615	0.76	0.64	0.82	0.786667	0.662222	0.84	0.445498	0.570088	0.33541	0.664364	9	SLE	enet
split_2	B_cell_Memory	0.695652	0.75	0.692308	0.601242	0.585558	0.804816	0.630769	0.580769	0.803846	0.650502	0.611237	0.787157	0.387833	0.272218	0.164083	0.604792	13	chrX	enet
split_2	B_cell_Memory	0.76087	0.894737	0.653846	0.824769	0.649539	0.869565	0.846154	0.680769	0.873077	0.866221	0.688859	0.879675	0.532348	0.703211	0.364292	0.74048	9	SLE	enet
split_2	B_cell_Naive	0.565217	0.875	0.269231	0.451993	0.387575	0.633189	0.571154	0.526923	0.692308	0.616778	0.580825	0.732441	0.198606	0.209471	0.0792594	0.46225	2	chrX	enet
split_2	B_cell_Naive	0.891304	0.956522	0.846154	0.913375	0.805184	0.956687	0.917308	0.823077	0.961538	0.912974	0.815426	0.966555	0.782609	0.828268	0.646675	0.916057	10	SLE	enet
split_2	B_cell	0.8	0.944444	0.68	0.755556	0.701525	0.888889	0.765	0.73	0.9	0.755778	0.734444	0.908406	0.608696	0.53	0.477512	0.8	2	chrX	enet
split_2	B_cell	0.822222	0.814815	0.88	0.749206	0.728395	0.911111	0.74	0.72	0.91	0.712	0.697165	0.890844	0.636364	0.505964	0.45675	0.821584	11	SLE	enet
split_2	CD4_positive,_alpha_beta_T_cell	0.782609	0.807692	0.807692	0.803685	0.68454	0.870062	0.798077	0.6825	0.873077	0.776415	0.679838	0.862598	0.557692	0.600207	0.372298	0.740485	2	chrX	enet
split_2	CD4_positive,_alpha_beta_T_cell	0.826087	0.95	0.730769	0.869565	0.7301	0.913373	0.884615	0.75	0.917308	0.899666	0.751421	0.916388	0.657993	0.769231	0.515907	0.828268	6	SLE	enet
split_2	CD4_T_cell_Effector_Memory	0.652174	1	0.384615	0.624569	0.501812	0.7301	0.692308	0.615385	0.769231	0.732441	0.665552	0.799331	0.352113	0.46225	0.339683	0.580119	2	chrX	enet
split_2	CD4_T_cell_Effector_Memory	0.891304	1	0.807692	0.913373	0.824769	0.956687	0.923077	0.846154	0.961538	0.93311	0.866221	0.966555	0.785047	0.839719	0.703211	0.916057	9	SLE	enet
split_2	CD4_T_cell_Naive	0.673913	0.789474	0.576923	0.709958	0.556936	0.782609	0.744231	0.580769	0.790385	0.763434	0.61204	0.796577	0.362292	0.516542	0.164083	0.58066	2	chrX	enet
split_2	CD4_T_cell_Naive	0.73913	0.888889	0.615385	0.71377	0.620714	0.847366	0.738462	0.655481	0.853846	0.74818	0.668339	0.866221	0.492647	0.489809	0.321983	0.703211	5	SLE	enet
split_2	CD4_T_cell_Treg	0.652174	0.666667	0.769231	0.664923	0.522141	0.76006	0.653846	0.515385	0.753846	0.655842	0.57292	0.736901	0.275591	0.325381	0.0338758	0.512475	2	chrX	enet
split_2	CD4_T_cell_Treg	0.869565	0.833333	0.961538	0.866977	0.778114	0.934562	0.855769	0.767019	0.930769	0.823021	0.742504	0.912053	0.728346	0.740593	0.599072	0.872966	10	SLE	enet
split_2	CD8_positive,_alpha_beta_T_cell	0.76087	0.741935	0.884615	0.754277	0.650633	0.866977	0.742308	0.642308	0.855769	0.721545	0.646536	0.823021	0.49901	0.512475	0.325381	0.734615	2	chrX	enet
split_2	CD8_positive,_alpha_beta_T_cell	0.847826	0.88	0.846154	0.889862	0.757526	0.934562	0.880769	0.751731	0.930769	0.850652	0.740347	0.916388	0.692161	0.782114	0.511065	0.867472	11	SLE	enet
split_2	CD8_T_cell_Cytotoxic_GZMH_	0.608696	0.722222	0.5	0.587933	0.478261	0.718598	0.594231	0.509615	0.738558	0.619844	0.570095	0.745873	0.238971	0.187562	0.0217104	0.488564	2	chrX	enet
split_2	CD8_T_cell_Cytotoxic_GZMH_	0.869565	0.916667	0.846154	0.956522	0.783432	0.935061	0.955769	0.790385	0.942308	0.946295	0.783293	0.949833	0.737643	0.911538	0.576353	0.877058	14	SLE	enet
split_2	CD8_T_cell_Cytotoxic_GZMK_	0.673913	0.866667	0.5	0.595151	0.550167	0.778468	0.636538	0.603846	0.796154	0.658505	0.632585	0.813174	0.37613	0.294203	0.235901	0.610089	2	chrX	enet
split_2	CD8_T_cell_Cytotoxic_GZMK_	0.869565	0.954545	0.807692	0.935061	0.783391	0.935061	0.942308	0.801923	0.942308	0.949833	0.802753	0.949833	0.740602	0.877058	0.613356	0.877058	12	SLE	enet
split_2	CD8_T_cell_MAIT	0.590909	1	0.25	0.531661	0.419275	0.628099	0.625	0.5625	0.6875	0.659091	0.602273	0.715909	0.232558	0.362738	0.246932	0.46291	2	chrX	enet
split_2	CD8_T_cell_MAIT	0.840909	1	0.708333	0.839175	0.739799	0.931924	0.854167	0.770833	0.9375	0.867424	0.791667	0.943182	0.688259	0.724356	0.591153	0.872278	12	SLE	enet
split_2	CD8_T_cell_Naive	0.652174	0.75	0.576923	0.674684	0.541966	0.761891	0.682692	0.55	0.777019	0.686256	0.592133	0.77146	0.315985	0.363641	0.0995227	0.557692	1	chrX	enet
split_2	CD8_T_cell_Naive	0.673913	1	0.423077	0.652281	0.534557	0.75458	0.711538	0.634615	0.788462	0.749164	0.682274	0.816054	0.389381	0.491689	0.371574	0.610089	5	SLE	enet
split_2	Classical_monocyte	0.673913	0.823529	0.538462	0.649539	0.550167	0.780962	0.669231	0.582692	0.801923	0.679673	0.615081	0.813174	0.369287	0.343792	0.175412	0.613356	1	chrX	enet
split_2	Classical_monocyte	0.869565	1	0.769231	0.824769	0.801841	0.935061	0.846154	0.826923	0.942308	0.866221	0.849498	0.949833	0.743494	0.703211	0.671512	0.877058	14	SLE	enet
split_2	Conventional_DC	0.652174	0.647059	0.846154	0.604051	0.510887	0.744093	0.598077	0.515385	0.734712	0.618825	0.57292	0.714807	0.258065	0.227965	0.0338758	0.512475	10	chrX	enet
split_2	Conventional_DC	0.847826	1	0.730769	0.824769	0.75458	0.914457	0.846154	0.788462	0.924038	0.866221	0.816054	0.933946	0.702403	0.703211	0.610089	0.841586	12	SLE	enet
split_2	Lymphocyte	0.652174	0.65625	0.807692	0.604051	0.522141	0.754277	0.598077	0.515385	0.742308	0.618825	0.57292	0.721545	0.266932	0.227965	0.0338758	0.512475	22	chrX	enet
split_2	Lymphocyte	0.782609	0.944444	0.653846	0.801841	0.672679	0.870059	0.826923	0.705769	0.884615	0.849498	0.730383	0.899666	0.577206	0.671512	0.453089	0.769231	17	SLE	enet
split_2	natural_killer_cell	0.608696	0.666667	0.615385	0.588721	0.480248	0.718598	0.588462	0.486538	0.72125	0.615385	0.558779	0.715719	0.212928	0.175412	-0.0269231	0.45168	21	chrX	enet
split_2	natural_killer_cell	0.782609	0.9	0.692308	0.870059	0.674684	0.870062	0.878846	0.7	0.884615	0.879675	0.707559	0.896321	0.572491	0.75193	0.415385	0.769231	15	SLE	enet
split_2	NK_cell_Bright	0.652174	0.708333	0.653846	0.740124	0.541932	0.761891	0.740385	0.536538	0.7675	0.7307	0.584634	0.755853	0.30038	0.477113	0.0742278	0.539719	2	chrX	enet
split_2	NK_cell_Bright	0.804348	0.904762	0.730769	0.870059	0.71377	0.891769	0.878846	0.726923	0.903846	0.879675	0.724956	0.899666	0.613084	0.75193	0.45168	0.803837	13	SLE	enet
split_2	NK_cell_Dim	0.717391	0.842105	0.615385	0.672834	0.605731	0.805184	0.688462	0.630769	0.826923	0.694596	0.645485	0.829783	0.44732	0.379486	0.263117	0.652691	2	chrX	enet
split_2	NK_cell_Dim	0.826087	0.95	0.730769	0.757805	0.734161	0.913373	0.782692	0.757692	0.923077	0.796577	0.7644	0.93311	0.657993	0.58066	0.523501	0.839719	14	SLE	enet
split_2	Non_classical_monocyte	0.695652	0.833333	0.576923	0.761435	0.577562	0.803756	0.771154	0.611538	0.815385	0.76732	0.632487	0.829783	0.408088	0.539719	0.225197	0.640513	1	chrX	enet
split_2	Non_classical_monocyte	0.934783	0.925926	0.961538	1	0.868548	0.978313	1	0.861538	0.980769	1	0.834687	0.983278	0.866538	1	0.734615	0.956949	12	SLE	enet
split_2	Plasmablast	0.461538	0.666667	0.173913	0.312608	0.266272	0.519951	0.480978	0.430707	0.611413	0.58194	0.568721	0.676561	0.0421053	-0.0616794	-0.194497	0.294605	2	chrX	enet
split_2	Plasmablast	0.641026	0.909091	0.434783	0.709703	0.492308	0.745696	0.76087	0.586957	0.782745	0.80379	0.646971	0.821628	0.334146	0.556038	0.209381	0.589768	10	SLE	enet
split_2	Plasmacytoid_DC	0.5	0.8	0.153846	0.501812	0.298525	0.517594	0.615385	0.482692	0.615385	0.665552	0.560201	0.665552	0.0926244	0.339683	-0.0509525	0.339683	2	chrX	enet
split_2	Plasmacytoid_DC	0.826087	0.95	0.730769	0.870059	0.734161	0.913373	0.878846	0.763462	0.923077	0.879675	0.76732	0.93311	0.657993	0.75193	0.539719	0.839719	10	SLE	enet
split_2	Progenitor_cell	0.625	0.583333	1	0.509718	0.415	0.664103	0.578947	0.526316	0.684211	0.567568	0.538462	0.636364	0.21875	0.299359	0.168345	0.4842	18	chrX	enet
split_2	Progenitor_cell	0.8	0.76	0.904762	0.845313	0.695396	0.898465	0.842105	0.694236	0.894737	0.777778	0.650476	0.840321	0.594937	0.729496	0.408838	0.799499	8	SLE	enet
split_2	B_cell_Atypical	0.622222	0.617647	0.84	0.605352	0.47037	0.711111	0.6	0.48975	0.705	0.611111	0.550547	0.68254	0.198953	0.219265	-0.0317271	0.462059	14	chrX	enet
split_2	B_cell_Atypical	0.711111	0.75	0.72	0.800594	0.600791	0.800594	0.805	0.6	0.81	0.789697	0.613527	0.794489	0.41791	0.606373	0.198811	0.62095	9	SLE	enet
split_2	B_cell_Memory	0.521739	1	0.153846	0.392994	0.309426	0.534557	0.557692	0.519231	0.634615	0.615385	0.58194	0.682274	0.136519	0.231662	0.130744	0.371574	13	chrX	enet
split_2	B_cell_Memory	0.673913	0.761905	0.615385	0.608696	0.556936	0.783432	0.619231	0.569231	0.790385	0.637793	0.604201	0.783293	0.35514	0.238462	0.142107	0.58066	9	SLE	enet
split_2	B_cell_Naive	0.5	1	0.115385	0.392994	0.309426	0.501812	0.557692	0.519231	0.615385	0.615385	0.58194	0.665552	0.101868	0.231662	0.130744	0.339683	2	chrX	enet
split_2	B_cell_Naive	0.782609	0.766667	0.884615	0.754277	0.672809	0.868548	0.742308	0.665385	0.861538	0.721545	0.664878	0.834687	0.547244	0.512475	0.372298	0.740593	10	SLE	enet
split_2	B_cell	0.777778	0.894737	0.68	0.844906	0.660694	0.86693	0.85	0.68975	0.88	0.838384	0.695236	0.890707	0.563107	0.695837	0.402422	0.764601	2	chrX	enet
split_2	B_cell	0.8	0.75	0.96	0.731235	0.69121	0.886003	0.725	0.685	0.875	0.694444	0.666797	0.833333	0.580311	0.559017	0.437993	0.778924	11	SLE	enet
split_2	CD4_positive,_alpha_beta_T_cell	0.782609	0.766667	0.884615	0.864803	0.677899	0.869565	0.85	0.670962	0.867308	0.8125	0.668574	0.847762	0.547244	0.754155	0.372298	0.754155	2	chrX	enet
split_2	CD4_positive,_alpha_beta_T_cell	0.847826	1	0.730769	0.913373	0.75458	0.935061	0.923077	0.788462	0.942308	0.93311	0.816054	0.949833	0.702403	0.839719	0.610089	0.877058	6	SLE	enet
split_2	CD4_T_cell_Effector_Memory	0.630435	0.764706	0.5	0.689855	0.495635	0.73918	0.719231	0.534615	0.757692	0.732023	0.584372	0.763482	0.285192	0.456365	0.0742278	0.523501	2	chrX	enet
split_2	CD4_T_cell_Effector_Memory	0.826087	0.909091	0.769231	0.826087	0.73913	0.913373	0.840385	0.746154	0.917596	0.846405	0.745819	0.916388	0.654135	0.680769	0.489809	0.833019	9	SLE	enet
split_2	CD4_T_cell_Naive	0.73913	0.791667	0.730769	0.73913	0.629001	0.84819	0.734615	0.621154	0.848077	0.722151	0.636299	0.831728	0.475285	0.469231	0.243955	0.693272	2	chrX	enet
split_2	CD4_T_cell_Naive	0.782609	0.833333	0.769231	0.826746	0.674684	0.870062	0.834615	0.676923	0.873077	0.829735	0.67893	0.863036	0.562738	0.664141	0.350823	0.74048	5	SLE	enet
split_2	CD4_T_cell_Treg	0.673913	0.703704	0.730769	0.76006	0.556591	0.782609	0.753846	0.551635	0.778846	0.736901	0.592464	0.761063	0.332689	0.511144	0.105011	0.557692	2	chrX	enet
split_2	CD4_T_cell_Treg	0.76087	0.941176	0.615385	0.75458	0.652281	0.869565	0.788462	0.692308	0.873365	0.816054	0.713907	0.882943	0.537477	0.610089	0.421182	0.741052	10	SLE	enet
split_2	CD8_positive,_alpha_beta_T_cell	0.73913	0.75	0.807692	0.805184	0.625368	0.847311	0.809615	0.615385	0.842308	0.799331	0.630954	0.818779	0.463035	0.613941	0.237004	0.68927	2	chrX	enet
split_2	CD8_positive,_alpha_beta_T_cell	0.804348	0.774194	0.923077	0.911318	0.697216	0.889862	0.9	0.686538	0.880769	0.866667	0.676445	0.850652	0.590099	0.832666	0.421924	0.782114	11	SLE	enet
split_2	CD8_T_cell_Cytotoxic_GZMH_	0.630435	0.764706	0.5	0.605731	0.512257	0.73913	0.625	0.542308	0.757692	0.64372	0.588211	0.763482	0.285192	0.253937	0.0880705	0.523501	2	chrX	enet
split_2	CD8_T_cell_Cytotoxic_GZMH_	0.76087	0.702703	1	0.577153	0.612589	0.840714	0.6	0.625	0.825	0.619048	0.634146	0.787879	0.480493	0.351866	0.398167	0.715626	14	SLE	enet
split_2	CD8_T_cell_Cytotoxic_GZMK_	0.521739	0.833333	0.192308	0.467432	0.340211	0.565835	0.596154	0.501923	0.648077	0.648829	0.566173	0.682274	0.127586	0.306282	0.0053082	0.371574	2	chrX	enet
split_2	CD8_T_cell_Cytotoxic_GZMK_	0.847826	0.913043	0.807692	0.935061	0.760078	0.934939	0.942308	0.765385	0.936538	0.949833	0.760802	0.93311	0.695652	0.877058	0.526235	0.868909	12	SLE	enet
split_2	CD8_T_cell_MAIT	0.727273	0.75	0.75	0.591756	0.612638	0.840493	0.591667	0.6125	0.8375	0.598485	0.612154	0.803182	0.45	0.182574	0.2243	0.678543	2	chrX	enet
split_2	CD8_T_cell_MAIT	0.772727	0.75	0.875	0.771292	0.664773	0.86365	0.766667	0.6625	0.862708	0.731935	0.642401	0.833807	0.533898	0.540128	0.353659	0.748331	12	SLE	enet
split_2	CD8_T_cell_Naive	0.543478	0.857143	0.230769	0.451993	0.352484	0.595794	0.571154	0.507692	0.673077	0.616778	0.569231	0.713907	0.162912	0.209471	0.0245026	0.421182	1	chrX	enet
split_2	CD8_T_cell_Naive	0.717391	0.933333	0.538462	0.530711	0.587338	0.80481	0.603846	0.648077	0.826923	0.637458	0.673579	0.849498	0.459313	0.249615	0.329448	0.671512	5	SLE	enet
split_2	Classical_monocyte	0.673913	0.823529	0.538462	0.649539	0.550167	0.778468	0.669231	0.586442	0.790385	0.679673	0.616952	0.799331	0.369287	0.343792	0.180144	0.592308	1	chrX	enet
split_2	Classical_monocyte	0.826087	0.875	0.807692	0.848476	0.718067	0.913375	0.853846	0.726923	0.917308	0.846154	0.722151	0.912053	0.65019	0.701646	0.45168	0.828268	14	SLE	enet
split_2	Conventional_DC	0.695652	0.772727	0.653846	0.761435	0.585589	0.803685	0.771154	0.588462	0.803846	0.76732	0.615385	0.799331	0.394737	0.539719	0.175412	0.613356	10	chrX	enet
split_2	Conventional_DC	0.804348	1	0.653846	0.824769	0.704949	0.891561	0.846154	0.75	0.903846	0.866221	0.782609	0.916388	0.621572	0.703211	0.550482	0.803837	12	SLE	enet
split_2	Lymphocyte	0.586957	0.64	0.615385	0.480248	0.467474	0.696812	0.475	0.463462	0.701923	0.553442	0.548196	0.693576	0.164436	-0.0496198	-0.0742278	0.401506	22	chrX	enet
split_2	Lymphocyte	0.76087	0.777778	0.807692	0.605645	0.649462	0.848476	0.596154	0.640385	0.855769	0.618968	0.651059	0.834687	0.510638	0.195336	0.285191	0.715798	17	SLE	enet
split_2	natural_killer_cell	0.630435	0.604651	1	0.408213	0.45537	0.645992	0.5	0.525	0.65	0.565217	0.577778	0.65	0.166311	0	0.169967	0.441588	21	chrX	enet
split_2	natural_killer_cell	0.717391	0.842105	0.615385	0.625699	0.601242	0.826746	0.65	0.625	0.834615	0.664962	0.64372	0.832776	0.44732	0.308106	0.253937	0.671512	15	SLE	enet
split_2	NK_cell_Bright	0.652174	0.65625	0.807692	0.510887	0.512811	0.749693	0.509615	0.515192	0.736538	0.569995	0.572821	0.721545	0.266932	0.0223495	0.0338758	0.512475	2	chrX	enet
split_2	NK_cell_Bright	0.782609	0.944444	0.653846	0.709958	0.679041	0.870059	0.744231	0.713462	0.884615	0.763434	0.730383	0.899666	0.577206	0.516542	0.453089	0.769231	13	SLE	enet
split_2	NK_cell_Dim	0.695652	0.7	0.807692	0.76006	0.575569	0.799094	0.753846	0.565385	0.790481	0.736901	0.600065	0.766809	0.366142	0.511144	0.138287	0.606022	2	chrX	enet
split_2	NK_cell_Dim	0.695652	0.6875	0.846154	0.68454	0.567651	0.795203	0.673077	0.561442	0.780769	0.668687	0.59729	0.750258	0.358566	0.372934	0.137936	0.600411	14	SLE	enet
split_2	Non_classical_monocyte	0.695652	0.833333	0.576923	0.734161	0.577562	0.8037	0.763462	0.611538	0.809904	0.779996	0.636343	0.816738	0.408088	0.548439	0.235901	0.628396	1	chrX	enet
split_2	Non_classical_monocyte	0.869565	0.833333	0.961538	0.845807	0.774671	0.934562	0.836538	0.761538	0.930769	0.807404	0.735786	0.912053	0.728346	0.691262	0.563545	0.872966	12	SLE	enet
split_2	Plasmablast	0.487179	0.8	0.173913	0.356117	0.2794	0.528202	0.502717	0.461957	0.630435	0.591081	0.578038	0.696767	0.0951276	0.00799616	-0.147929	0.355643	2	chrX	enet
split_2	Plasmablast	0.717949	0.75	0.782609	0.745304	0.589744	0.844231	0.744565	0.576087	0.831522	0.75219	0.630459	0.818398	0.411523	0.482617	0.152174	0.679989	10	SLE	enet
split_2	Plasmacytoid_DC	0.695652	0.833333	0.576923	0.757805	0.568772	0.8037	0.782692	0.603846	0.821154	0.796577	0.63014	0.829783	0.408088	0.58066	0.217254	0.646675	2	chrX	enet
split_2	Plasmacytoid_DC	0.76087	0.777778	0.807692	0.826087	0.652174	0.868548	0.823077	0.646154	0.861538	0.802933	0.653203	0.846154	0.510638	0.646154	0.292308	0.734615	10	SLE	enet
split_2	Progenitor_cell	0.625	0.625	0.714286	0.746164	0.492327	0.746164	0.744361	0.493734	0.744361	0.692143	0.521905	0.692143	0.242424	0.504118	-0.0129261	0.49876	18	chrX	enet
split_2	Progenitor_cell	0.65	0.733333	0.52381	0.597995	0.514444	0.766068	0.60401	0.535088	0.775689	0.588936	0.544444	0.75119	0.308642	0.210137	0.0764719	0.558495	8	SLE	enet
split_2	B_cell_Atypical	0.666667	0.777778	0.56	0.70911	0.536662	0.778217	0.725	0.56475	0.79	0.722222	0.592	0.786199	0.347826	0.456435	0.130787	0.583512	14	chrX	enet
split_2	B_cell_Atypical	0.733333	0.933333	0.56	0.726667	0.611578	0.821695	0.755	0.66	0.84	0.767111	0.679556	0.857778	0.485714	0.537587	0.370252	0.696932	9	SLE	enet
split_2	B_cell_Memory	0.804348	0.774194	0.923077	0.866977	0.704183	0.889862	0.855769	0.692308	0.880769	0.823021	0.681768	0.850652	0.590099	0.740593	0.418928	0.782114	13	chrX	enet
split_2	B_cell_Memory	0.782609	0.807692	0.807692	0.798954	0.672809	0.869565	0.786538	0.665385	0.867308	0.758118	0.666419	0.850652	0.557692	0.606022	0.333018	0.74048	9	SLE	enet
split_2	B_cell_Naive	0.565217	0.666667	0.461538	0.512629	0.441962	0.674684	0.542308	0.467308	0.692404	0.588211	0.550255	0.700897	0.154412	0.0880705	-0.0658292	0.398957	2	chrX	enet
split_2	B_cell_Naive	0.826087	1	0.692308	0.7301	0.7301	0.913373	0.769231	0.769231	0.923077	0.799331	0.799331	0.93311	0.661765	0.580119	0.580119	0.839719	10	SLE	enet
split_2	B_cell	0.777778	0.857143	0.72	0.775132	0.666667	0.866937	0.795	0.68475	0.875	0.802353	0.673956	0.873016	0.558824	0.604691	0.37	0.747018	2	chrX	enet
split_2	B_cell	0.777778	1	0.6	0.747444	0.668724	0.866271	0.78	0.72	0.88	0.804444	0.751111	0.893333	0.571429	0.601074	0.508747	0.764601	11	SLE	enet
split_2	CD4_positive,_alpha_beta_T_cell	0.76087	0.727273	0.923077	0.754277	0.640537	0.845807	0.742308	0.636538	0.836538	0.721545	0.642231	0.807404	0.492986	0.512475	0.326055	0.715626	2	chrX	enet
split_2	CD4_positive,_alpha_beta_T_cell	0.826087	0.909091	0.769231	0.80481	0.737154	0.913375	0.815385	0.746154	0.923077	0.813346	0.740347	0.929632	0.654135	0.627758	0.488564	0.839719	6	SLE	enet
split_2	CD4_T_cell_Effector_Memory	0.630435	0.621622	0.884615	0.640537	0.476371	0.709955	0.636538	0.498077	0.700288	0.642231	0.564274	0.687554	0.197125	0.341244	-0.0053082	0.483046	2	chrX	enet
split_2	CD4_T_cell_Effector_Memory	0.847826	1	0.730769	0.847322	0.75458	0.935061	0.865385	0.788462	0.942308	0.882943	0.816054	0.949833	0.702403	0.735738	0.610089	0.877058	9	SLE	enet
split_2	CD4_T_cell_Naive	0.73913	0.888889	0.615385	0.649539	0.62545	0.826746	0.669231	0.655769	0.846154	0.679673	0.673579	0.849498	0.492647	0.343792	0.329448	0.701646	2	chrX	enet
split_2	CD4_T_cell_Naive	0.804348	0.793103	0.884615	0.798954	0.703834	0.889862	0.786538	0.692308	0.880769	0.758118	0.681768	0.850652	0.594912	0.606022	0.418707	0.782114	5	SLE	enet
split_2	CD4_T_cell_Treg	0.630435	0.615385	0.923077	0.592608	0.471441	0.688465	0.592308	0.498077	0.680769	0.615113	0.564274	0.671427	0.18711	0.2307	-0.0053082	0.451787	2	chrX	enet
split_2	CD4_T_cell_Treg	0.891304	0.956522	0.846154	0.935061	0.824769	0.956687	0.942308	0.826923	0.961538	0.949833	0.815426	0.966555	0.782609	0.877058	0.652691	0.916057	10	SLE	enet
split_2	CD8_positive,_alpha_beta_T_cell	0.782609	0.785714	0.846154	0.761891	0.672809	0.869565	0.765385	0.665385	0.867308	0.755853	0.666419	0.847762	0.552529	0.526235	0.333018	0.740593	2	chrX	enet
split_2	CD8_positive,_alpha_beta_T_cell	0.891304	0.956522	0.846154	0.826087	0.805184	0.956687	0.840385	0.822981	0.961538	0.846405	0.815426	0.966555	0.782609	0.680769	0.646675	0.916057	11	SLE	enet
split_2	CD8_T_cell_Cytotoxic_GZMH_	0.630435	0.764706	0.5	0.734161	0.493593	0.73913	0.763462	0.534615	0.757692	0.779996	0.584372	0.7644	0.285192	0.548439	0.0742278	0.523501	2	chrX	enet
split_2	CD8_T_cell_Cytotoxic_GZMH_	0.847826	1	0.730769	0.778468	0.75458	0.913373	0.807692	0.788462	0.923077	0.832776	0.816054	0.93311	0.702403	0.640513	0.610089	0.839719	14	SLE	enet
split_2	CD8_T_cell_Cytotoxic_GZMK_	0.630435	0.666667	0.692308	0.737096	0.51225	0.740308	0.728846	0.501923	0.742308	0.714465	0.566165	0.728866	0.243714	0.464901	0.0040032	0.504132	2	chrX	enet
split_2	CD8_T_cell_Cytotoxic_GZMK_	0.869565	0.954545	0.807692	0.913373	0.782609	0.935061	0.923077	0.796154	0.942308	0.93311	0.79699	0.949833	0.740602	0.839719	0.599812	0.877058	12	SLE	enet
split_2	CD8_T_cell_MAIT	0.590909	0.75	0.375	0.522145	0.455943	0.692489	0.566667	0.5125	0.716667	0.585859	0.551847	0.719444	0.214286	0.149071	0.0258775	0.463949	2	chrX	enet
split_2	CD8_T_cell_MAIT	0.886364	0.952381	0.833333	0.954545	0.795773	0.95464	0.954167	0.812292	0.958333	0.94113	0.797348	0.962121	0.773663	0.908333	0.633197	0.912871	12	SLE	enet
split_2	CD8_T_cell_Naive	0.630435	0.846154	0.423077	0.640134	0.483782	0.7301	0.680769	0.559615	0.757692	0.699952	0.601505	0.779996	0.300537	0.389509	0.143298	0.548439	1	chrX	enet
split_2	CD8_T_cell_Naive	0.673913	1	0.423077	0.75458	0.534557	0.75458	0.788462	0.634615	0.788462	0.816054	0.682274	0.816054	0.389381	0.610089	0.371574	0.610089	5	SLE	enet
split_2	Classical_monocyte	0.652174	0.708333	0.653846	0.761435	0.541932	0.761441	0.771154	0.532692	0.765385	0.76732	0.582064	0.751792	0.30038	0.539719	0.0658292	0.526235	1	chrX	enet
split_2	Classical_monocyte	0.847826	1	0.730769	0.869565	0.75458	0.935061	0.884615	0.788462	0.942308	0.899666	0.816054	0.949833	0.702403	0.769231	0.610089	0.877058	14	SLE	enet
split_2	Conventional_DC	0.695652	0.65	1	0.577153	0.539382	0.737769	0.6	0.575	0.72625	0.619048	0.604651	0.703679	0.32636	0.351866	0.301161	0.564261	10	chrX	enet
split_2	Conventional_DC	0.847826	0.913043	0.807692	0.826746	0.757805	0.934939	0.834615	0.759519	0.936538	0.829735	0.751421	0.929806	0.695652	0.664141	0.516752	0.868909	12	SLE	enet
split_2	Lymphocyte	0.76087	0.714286	0.961538	0.840714	0.640537	0.840714	0.825	0.636538	0.825	0.787879	0.642231	0.787879	0.486815	0.715626	0.341244	0.700371	22	chrX	enet
split_2	Lymphocyte	0.804348	0.904762	0.730769	0.826746	0.696805	0.891769	0.834615	0.719231	0.898077	0.829735	0.7199	0.899666	0.613084	0.664141	0.438529	0.789352	17	SLE	enet
split_2	natural_killer_cell	0.804348	0.904762	0.730769	0.891769	0.71377	0.891769	0.898077	0.725	0.903846	0.896321	0.724956	0.912974	0.613084	0.789352	0.45168	0.803837	21	chrX	enet
split_2	natural_killer_cell	0.804348	1	0.653846	0.847322	0.704949	0.891561	0.865385	0.75	0.903846	0.882943	0.782609	0.916388	0.621572	0.735738	0.550482	0.803837	15	SLE	enet
split_2	NK_cell_Bright	0.652174	0.8125	0.5	0.620714	0.52338	0.757805	0.655769	0.567308	0.776923	0.673579	0.604236	0.783307	0.330909	0.329448	0.143298	0.558737	2	chrX	enet
split_2	NK_cell_Bright	0.826087	0.95	0.730769	0.869565	0.734161	0.913373	0.884615	0.757692	0.923077	0.899666	0.7644	0.93311	0.657993	0.769231	0.523501	0.839719	13	SLE	enet
split_2	NK_cell_Dim	0.717391	0.782609	0.692308	0.693347	0.605731	0.826746	0.713462	0.607692	0.828846	0.7199	0.627648	0.815426	0.434783	0.433647	0.213747	0.652691	2	chrX	enet
split_2	NK_cell_Dim	0.891304	1	0.807692	0.869565	0.824769	0.956687	0.884615	0.846154	0.961538	0.899666	0.866221	0.966555	0.785047	0.769231	0.703211	0.916057	14	SLE	enet
split_2	Non_classical_monocyte	0.630435	0.909091	0.384615	0.652281	0.485563	0.71377	0.711538	0.584327	0.75	0.749164	0.622445	0.782609	0.307965	0.491689	0.209471	0.550482	1	chrX	enet
split_2	Non_classical_monocyte	0.869565	0.954545	0.807692	0.801841	0.782609	0.936134	0.826923	0.796154	0.942981	0.849498	0.79699	0.949833	0.740602	0.671512	0.592308	0.878782	12	SLE	enet
split_2	Plasmablast	0.589744	0.733333	0.478261	0.453038	0.445796	0.719808	0.536685	0.486413	0.732473	0.60981	0.583373	0.763378	0.212121	0.085656	-0.0278639	0.479186	2	chrX	enet
split_2	Plasmablast	0.692308	1	0.478261	0.709703	0.548718	0.793792	0.76087	0.652174	0.826087	0.80379	0.714604	0.857302	0.429268	0.556038	0.390095	0.65938	10	SLE	enet
split_2	Plasmacytoid_DC	0.586957	0.666667	0.538462	0.561924	0.460133	0.696812	0.580769	0.475	0.701923	0.61204	0.553442	0.707559	0.183178	0.164083	-0.0496198	0.415385	2	chrX	enet
split_2	Plasmacytoid_DC	0.869565	0.884615	0.884615	0.869565	0.782609	0.956183	0.867308	0.778846	0.95	0.847762	0.761063	0.946295	0.734615	0.734615	0.557692	0.911538	10	SLE	enet
split_2	Progenitor_cell	0.575	0.6	0.571429	0.675203	0.447243	0.7	0.675439	0.448622	0.704261	0.641667	0.501757	0.673389	0.15	0.350438	-0.102757	0.412679	18	chrX	enet
split_2	Progenitor_cell	0.65	0.666667	0.666667	0.772879	0.525238	0.774576	0.780702	0.527569	0.773183	0.758333	0.53955	0.725541	0.298246	0.572263	0.0553463	0.550689	8	SLE	enet
split_2	B_cell_Atypical	0.511111	0.615385	0.32	0.471929	0.36818	0.609687	0.51	0.42	0.645	0.560635	0.527778	0.656825	0.0660377	0.0214669	-0.171736	0.311271	14	chrX	enet
split_2	B_cell_Atypical	0.711111	1	0.48	0.516372	0.581251	0.796416	0.62	0.66	0.82	0.662222	0.697778	0.84	0.450704	0.350823	0.4159	0.664364	9	SLE	enet
split_2	B_cell_Memory	0.717391	0.69697	0.884615	0.677899	0.594409	0.819737	0.667308	0.590385	0.805769	0.663634	0.614994	0.776691	0.400802	0.377761	0.188151	0.65885	13	chrX	enet
split_2	B_cell_Memory	0.73913	0.818182	0.692308	0.760078	0.631308	0.848186	0.776923	0.644231	0.848077	0.780672	0.653203	0.846405	0.481203	0.557612	0.290423	0.692831	9	SLE	enet
split_2	B_cell_Naive	0.586957	0.666667	0.538462	0.53147	0.460201	0.696805	0.567308	0.475	0.705865	0.604236	0.553442	0.704467	0.183178	0.142354	-0.0496198	0.415385	2	chrX	enet
split_2	B_cell_Naive	0.891304	0.92	0.884615	0.934562	0.804816	0.956687	0.930769	0.815385	0.961538	0.912053	0.797164	0.966555	0.780115	0.867396	0.627758	0.916057	10	SLE	enet
split_2	B_cell	0.777778	0.894737	0.68	0.70911	0.667607	0.867063	0.725	0.695	0.88	0.722222	0.695236	0.890707	0.563107	0.456435	0.401723	0.764601	2	chrX	enet
split_2	B_cell	0.822222	0.814815	0.88	0.842541	0.728395	0.910481	0.835	0.72	0.905	0.800159	0.697165	0.890707	0.636364	0.686683	0.45675	0.821584	11	SLE	enet
split_2	CD4_positive,_alpha_beta_T_cell	0.76087	0.758621	0.846154	0.780914	0.653499	0.848186	0.773077	0.648077	0.848077	0.751792	0.651059	0.818779	0.504892	0.554755	0.312414	0.699672	2	chrX	enet
split_2	CD4_positive,_alpha_beta_T_cell	0.804348	0.947368	0.692308	0.847322	0.709958	0.891769	0.865385	0.738462	0.903846	0.882943	0.74818	0.916388	0.617375	0.735738	0.489809	0.803837	6	SLE	enet
split_2	CD4_T_cell_Effector_Memory	0.673913	1	0.423077	0.565835	0.534557	0.75458	0.653846	0.634615	0.788462	0.698997	0.682274	0.816054	0.389381	0.402422	0.371574	0.610089	2	chrX	enet
split_2	CD4_T_cell_Effector_Memory	0.891304	1	0.807692	0.869565	0.824769	0.956687	0.884615	0.846154	0.961538	0.899666	0.866221	0.966555	0.785047	0.769231	0.703211	0.916057	9	SLE	enet
split_2	CD4_T_cell_Naive	0.76087	0.826087	0.730769	0.782609	0.653499	0.869565	0.778846	0.657692	0.867308	0.761063	0.664944	0.862598	0.521739	0.557692	0.312986	0.734615	2	chrX	enet
split_2	CD4_T_cell_Naive	0.73913	0.85	0.653846	0.824769	0.629212	0.826749	0.846154	0.65	0.846154	0.866221	0.658793	0.846405	0.486989	0.703211	0.301536	0.692831	5	SLE	enet
split_2	CD4_T_cell_Treg	0.673913	0.666667	0.846154	0.795203	0.54468	0.769928	0.780769	0.540385	0.755962	0.750177	0.586068	0.735786	0.308617	0.618233	0.0956239	0.556445	2	chrX	enet
split_2	CD4_T_cell_Treg	0.869565	0.833333	0.961538	0.815942	0.79038	0.934562	0.8	0.775	0.930769	0.764706	0.743423	0.912053	0.728346	0.677365	0.600411	0.872966	10	SLE	enet
split_2	CD8_positive,_alpha_beta_T_cell	0.717391	0.882353	0.576923	0.757805	0.605731	0.80481	0.782692	0.642019	0.821154	0.796577	0.658505	0.832776	0.453382	0.58066	0.294203	0.646675	2	chrX	enet
split_2	CD8_positive,_alpha_beta_T_cell	0.847826	0.851852	0.884615	0.826087	0.76006	0.934562	0.823077	0.753846	0.930769	0.802933	0.736901	0.912053	0.688588	0.646154	0.511144	0.867396	11	SLE	enet
split_2	CD8_T_cell_Cytotoxic_GZMH_	0.608696	0.833333	0.384615	0.500686	0.453133	0.709958	0.584615	0.540385	0.744231	0.622445	0.588629	0.7644	0.263345	0.211475	0.100931	0.52105	2	chrX	enet
split_2	CD8_T_cell_Cytotoxic_GZMH_	0.847826	1	0.730769	0.869565	0.75458	0.914457	0.884615	0.788462	0.924038	0.899666	0.816054	0.933946	0.702403	0.769231	0.610089	0.841586	14	SLE	enet
split_2	CD8_T_cell_Cytotoxic_GZMK_	0.717391	0.809524	0.653846	0.653499	0.601242	0.826087	0.651923	0.613462	0.828846	0.658793	0.636151	0.829783	0.441121	0.301536	0.235366	0.652691	2	chrX	enet
split_2	CD8_T_cell_Cytotoxic_GZMK_	0.826087	0.909091	0.769231	0.783437	0.737154	0.913375	0.784615	0.746154	0.917308	0.77146	0.740347	0.916388	0.654135	0.564902	0.488564	0.828268	12	SLE	enet
split_2	CD8_T_cell_MAIT	0.613636	0.818182	0.375	0.64518	0.461874	0.713287	0.679167	0.5375	0.741667	0.683275	0.565909	0.753788	0.26087	0.391071	0.0909467	0.527046	2	chrX	enet
split_2	CD8_T_cell_MAIT	0.840909	1	0.708333	0.862789	0.739799	0.931924	0.875	0.770833	0.9375	0.886364	0.791667	0.943182	0.688259	0.759555	0.591153	0.872278	12	SLE	enet
split_2	CD8_T_cell_Naive	0.652174	0.75	0.576923	0.696812	0.544558	0.761435	0.696154	0.561346	0.771442	0.693144	0.599526	0.77146	0.315985	0.389324	0.125429	0.548898	1	chrX	enet
split_2	CD8_T_cell_Naive	0.673913	0.823529	0.538462	0.665336	0.556936	0.782609	0.7	0.586538	0.796154	0.715942	0.622171	0.813174	0.369287	0.422995	0.198116	0.610089	5	SLE	enet
split_2	Classical_monocyte	0.673913	0.823529	0.538462	0.75458	0.550167	0.783432	0.788462	0.586538	0.807692	0.816054	0.616874	0.813174	0.369287	0.610089	0.180144	0.613941	1	chrX	enet
split_2	Classical_monocyte	0.891304	1	0.807692	0.891561	0.824769	0.956687	0.903846	0.846154	0.961538	0.916388	0.866221	0.966555	0.785047	0.803837	0.703211	0.916057	14	SLE	enet
split_2	Conventional_DC	0.608696	0.633333	0.730769	0.557469	0.478261	0.716434	0.553846	0.471154	0.709615	0.593311	0.551535	0.695062	0.185039	0.125157	-0.0615385	0.428956	10	chrX	enet
split_2	Conventional_DC	0.847826	1	0.730769	0.847322	0.75458	0.935061	0.865385	0.788462	0.942308	0.882943	0.816054	0.949833	0.702403	0.735738	0.610089	0.877058	12	SLE	enet
split_2	Lymphocyte	0.652174	0.727273	0.615385	0.696805	0.537628	0.761441	0.701923	0.542308	0.7675	0.700897	0.588211	0.7644	0.308271	0.400775	0.0877058	0.539719	22	chrX	enet
split_2	Lymphocyte	0.826087	0.95	0.730769	0.826087	0.737154	0.913373	0.840385	0.757692	0.923077	0.846405	0.7644	0.929632	0.657993	0.680769	0.523501	0.839719	17	SLE	enet
split_2	natural_killer_cell	0.73913	0.75	0.807692	0.689614	0.631318	0.845807	0.678846	0.626923	0.836538	0.67408	0.640268	0.815426	0.463035	0.372298	0.252634	0.68927	21	chrX	enet
split_2	natural_killer_cell	0.782609	0.863636	0.730769	0.848476	0.675275	0.870062	0.853846	0.694038	0.884615	0.846154	0.699952	0.882943	0.567669	0.701646	0.389509	0.769231	15	SLE	enet
split_2	NK_cell_Bright	0.673913	0.72	0.692308	0.653491	0.565217	0.782609	0.657692	0.557692	0.778846	0.664944	0.59609	0.76732	0.340344	0.312986	0.115385	0.557692	2	chrX	enet
split_2	NK_cell_Bright	0.782609	0.863636	0.730769	0.870062	0.675306	0.870062	0.873077	0.688462	0.879135	0.862598	0.693144	0.879675	0.567669	0.74048	0.379486	0.769231	13	SLE	enet
split_2	NK_cell_Dim	0.717391	0.842105	0.615385	0.608696	0.605731	0.826087	0.619231	0.630577	0.834615	0.637793	0.645397	0.846154	0.44732	0.238462	0.262877	0.671512	2	chrX	enet
split_2	NK_cell_Dim	0.826087	1	0.692308	0.847322	0.7301	0.913373	0.865385	0.769231	0.923077	0.882943	0.799331	0.93311	0.661765	0.735738	0.580119	0.839719	14	SLE	enet
split_2	Non_classical_monocyte	0.695652	0.833333	0.576923	0.610178	0.581664	0.8037	0.613462	0.605769	0.809615	0.632487	0.63014	0.816054	0.408088	0.225197	0.217254	0.627758	1	chrX	enet
split_2	Non_classical_monocyte	0.891304	0.92	0.884615	0.913373	0.805184	0.956522	0.923077	0.809615	0.955769	0.93311	0.799331	0.949833	0.780115	0.839719	0.613941	0.914174	12	SLE	enet
split_2	Plasmablast	0.666667	0.647059	0.956522	0.628722	0.49299	0.728797	0.612772	0.518886	0.706522	0.650467	0.599041	0.712451	0.230653	0.289088	0.0607164	0.511237	2	chrX	enet
split_2	Plasmablast	0.692308	0.761905	0.695652	0.564103	0.566976	0.821238	0.58288	0.56644	0.819293	0.636497	0.624659	0.81603	0.376	0.165761	0.135991	0.633444	10	SLE	enet
split_2	Plasmacytoid_DC	0.478261	1	0.0769231	0.352484	0.263505	0.43123	0.538462	0.5	0.576923	0.598662	0.565217	0.632107	0.0675676	0.186989	0	0.270666	2	chrX	enet
split_2	Plasmacytoid_DC	0.847826	0.952381	0.769231	0.801841	0.757805	0.934945	0.826923	0.776923	0.936827	0.849498	0.780672	0.93377	0.699065	0.671512	0.557612	0.869317	10	SLE	enet
split_2	Progenitor_cell	0.475	0	0	0.305932	0.305932	0.305932	0.5	0.5	0.5	0.525	0.525	0.525	0	0	0	0	18	chrX	enet
split_2	Progenitor_cell	0.8	0.809524	0.809524	0.924859	0.698496	0.9	0.923559	0.699248	0.899749	0.890801	0.660204	0.868594	0.598997	0.850321	0.398496	0.799499	8	SLE	enet
split_2	B_cell_Atypical	0.555556	0.857143	0.24	0.377778	0.377778	0.611578	0.51	0.515	0.675	0.560889	0.564389	0.697778	0.174312	0.0316228	0.0471042	0.4159	5	chrX	intersection
split_2	B_cell_Atypical	0.755556	0.818182	0.72	0.800594	0.645147	0.866667	0.805	0.65	0.865	0.789697	0.650794	0.841067	0.512315	0.606373	0.298807	0.73	5	SLE	intersection
split_2	B_cell_Memory	0.76087	0.741935	0.884615	0.868548	0.650633	0.847311	0.861538	0.642308	0.842308	0.834687	0.647977	0.818779	0.49901	0.734465	0.325381	0.699569	4	chrX	intersection
split_2	B_cell_Memory	0.76087	0.826087	0.730769	0.80481	0.652174	0.869565	0.815385	0.663462	0.867308	0.813346	0.671823	0.862598	0.521739	0.627758	0.326923	0.734615	6	SLE	intersection
split_2	B_cell_Naive	0.804348	0.904762	0.730769	0.826746	0.695652	0.891564	0.834615	0.713462	0.898077	0.829735	0.715942	0.899666	0.613084	0.664141	0.4334	0.789352	8	SLE	intersection
split_2	B_cell	0.6	0.705882	0.48	0.623344	0.47973	0.70911	0.625	0.5	0.725	0.631313	0.555556	0.722222	0.221154	0.248513	0	0.456435	1	chrX	intersection
split_2	B_cell	0.733333	0.882353	0.6	0.660694	0.609687	0.822574	0.685	0.645	0.84	0.689167	0.656825	0.84	0.480769	0.384085	0.311271	0.695837	6	SLE	intersection
split_2	CD4_positive,_alpha_beta_T_cell	0.73913	0.75	0.807692	0.782609	0.620246	0.845807	0.796154	0.609615	0.836538	0.79699	0.627601	0.815426	0.463035	0.592308	0.231834	0.68927	2	chrX	intersection
split_2	CD4_positive,_alpha_beta_T_cell	0.804348	0.774194	0.923077	0.743798	0.697216	0.890936	0.730769	0.686538	0.886538	0.708552	0.676445	0.863991	0.590099	0.536388	0.423448	0.793116	6	SLE	intersection
split_2	CD4_T_cell_Effector_Memory	0.586957	0.684211	0.5	0.521739	0.457821	0.69571	0.530769	0.484615	0.707692	0.581271	0.558014	0.709699	0.192237	0.0615385	-0.0338758	0.421227	1	chrX	intersection
split_2	CD4_T_cell_Effector_Memory	0.847826	1	0.730769	0.869565	0.75458	0.913373	0.884615	0.788462	0.923077	0.899666	0.816054	0.93311	0.702403	0.769231	0.610089	0.839719	7	SLE	intersection
split_2	CD4_T_cell_Naive	0.73913	0.888889	0.615385	0.8037	0.629036	0.847322	0.821154	0.661538	0.859615	0.829783	0.67893	0.863036	0.492647	0.646675	0.343792	0.715798	2	chrX	intersection
split_2	CD4_T_cell_Naive	0.847826	0.827586	0.923077	0.743798	0.757526	0.933917	0.730769	0.747788	0.925	0.708552	0.728753	0.896552	0.684932	0.536388	0.512475	0.867396	5	SLE	intersection
split_2	CD4_T_cell_Treg	0.608696	0.653846	0.653846	0.605731	0.486216	0.718598	0.625	0.482404	0.721154	0.64372	0.556779	0.709699	0.203846	0.253937	-0.0362135	0.439187	1	chrX	intersection
split_2	CD4_T_cell_Treg	0.913043	0.923077	0.923077	0.956687	0.842787	0.978313	0.961538	0.836442	0.980769	0.966555	0.807404	0.983278	0.823077	0.916057	0.688845	0.956949	8	SLE	intersection
split_2	CD8_positive,_alpha_beta_T_cell	0.73913	0.888889	0.615385	0.740119	0.620714	0.826749	0.746154	0.655769	0.846154	0.740347	0.673579	0.850153	0.492647	0.488564	0.329448	0.703211	2	chrX	intersection
split_2	CD8_positive,_alpha_beta_T_cell	0.76087	0.894737	0.653846	0.757805	0.652174	0.848186	0.782692	0.680769	0.859904	0.796577	0.693144	0.866221	0.532348	0.58066	0.379486	0.716795	6	SLE	intersection
split_2	CD8_T_cell_Cytotoxic_GZMH_	0.673913	0.666667	0.846154	0.658672	0.54468	0.757697	0.648077	0.540385	0.748077	0.651059	0.586068	0.728753	0.308617	0.326055	0.0870179	0.536388	2	chrX	intersection
split_2	CD8_T_cell_Cytotoxic_GZMH_	0.826087	0.95	0.730769	0.847322	0.733958	0.913373	0.865385	0.751923	0.923077	0.882943	0.763434	0.929632	0.657993	0.735738	0.523501	0.839719	6	SLE	intersection
split_2	CD8_T_cell_Cytotoxic_GZMK_	0.630435	0.666667	0.692308	0.549343	0.502136	0.73918	0.540385	0.501827	0.734712	0.586068	0.566118	0.722151	0.243714	0.0870179	0.00380304	0.477113	2	chrX	intersection
split_2	CD8_T_cell_Cytotoxic_GZMK_	0.847826	1	0.730769	0.869565	0.75458	0.935061	0.884615	0.788462	0.942308	0.899666	0.816054	0.949833	0.702403	0.769231	0.610089	0.877058	10	SLE	intersection
split_2	CD8_T_cell_MAIT	0.568182	0.647059	0.458333	0.604538	0.43035	0.681818	0.629167	0.458333	0.695833	0.631566	0.526515	0.689755	0.153846	0.271367	-0.0833333	0.405414	2	chrX	intersection
split_2	CD8_T_cell_MAIT	0.840909	0.947368	0.75	0.839175	0.747276	0.931924	0.854167	0.7625	0.933333	0.867424	0.756016	0.924242	0.685714	0.724356	0.536875	0.863971	7	SLE	intersection
split_2	CD8_T_cell_Naive	0.695652	0.833333	0.576923	0.737154	0.576092	0.80481	0.757692	0.605769	0.815385	0.7644	0.63014	0.816738	0.408088	0.523501	0.221446	0.640513	5	SLE	intersection
split_2	Classical_monocyte	0.630435	0.764706	0.5	0.610178	0.500686	0.740847	0.613462	0.542212	0.763558	0.632487	0.588211	0.779996	0.285192	0.225197	0.0880523	0.548439	1	chrX	intersection
split_2	Classical_monocyte	0.847826	0.952381	0.769231	0.935061	0.760078	0.934939	0.942308	0.782692	0.936538	0.949833	0.783293	0.93311	0.699065	0.877058	0.576353	0.868909	7	SLE	intersection
split_2	Conventional_DC	0.521739	0.642857	0.346154	0.468323	0.374105	0.620714	0.498077	0.434615	0.65	0.564277	0.540117	0.671823	0.0899281	-0.0040032	-0.138287	0.327049	1	chrX	intersection
split_2	Conventional_DC	0.826087	0.909091	0.769231	0.826746	0.737154	0.913373	0.834615	0.744038	0.917308	0.829735	0.740347	0.916388	0.654135	0.664141	0.488564	0.828268	7	SLE	intersection
split_2	Lymphocyte	0.695652	0.8	0.615385	0.718598	0.585589	0.8037	0.721154	0.6	0.815385	0.715719	0.624714	0.813346	0.401487	0.438529	0.20136	0.627758	7	chrX	intersection
split_2	Lymphocyte	0.826087	0.875	0.807692	0.80481	0.737154	0.913373	0.815385	0.734615	0.917308	0.813346	0.724956	0.912974	0.65019	0.627758	0.469231	0.828268	6	SLE	intersection
split_2	natural_killer_cell	0.717391	0.882353	0.576923	0.665336	0.605731	0.824835	0.7	0.636538	0.840385	0.715942	0.657631	0.846405	0.453382	0.422995	0.290423	0.680769	8	chrX	intersection
split_2	natural_killer_cell	0.782609	0.863636	0.730769	0.73913	0.674684	0.889862	0.751923	0.694231	0.884615	0.751421	0.694523	0.882943	0.567669	0.503846	0.389324	0.778333	8	SLE	intersection
split_2	NK_cell_Bright	0.630435	0.714286	0.576923	0.610186	0.512629	0.740119	0.607692	0.525	0.746154	0.627648	0.578063	0.746894	0.269159	0.213747	0.0496198	0.490511	2	chrX	intersection
split_2	NK_cell_Bright	0.804348	1	0.653846	0.778468	0.704949	0.891561	0.807692	0.75	0.903846	0.832776	0.782609	0.916388	0.621572	0.640513	0.550482	0.803837	10	SLE	intersection
split_2	NK_cell_Dim	0.695652	0.833333	0.576923	0.778468	0.581664	0.8037	0.807692	0.611346	0.821154	0.832776	0.63237	0.829735	0.408088	0.640513	0.22501	0.646675	2	chrX	intersection
split_2	NK_cell_Dim	0.891304	1	0.807692	0.935061	0.824769	0.956687	0.942308	0.846154	0.961538	0.949833	0.866221	0.966555	0.785047	0.877058	0.703211	0.916057	9	SLE	intersection
split_2	Non_classical_monocyte	0.630435	0.846154	0.423077	0.57764	0.483782	0.7301	0.648077	0.559615	0.763462	0.681104	0.601505	0.782609	0.300537	0.355933	0.142354	0.550482	1	chrX	intersection
split_2	Non_classical_monocyte	0.847826	0.952381	0.769231	0.826746	0.760078	0.934939	0.834615	0.776923	0.936538	0.829735	0.780672	0.93311	0.699065	0.664141	0.557612	0.868909	8	SLE	intersection
split_2	Plasmablast	0.641026	0.666667	0.782609	0.5549	0.495726	0.752163	0.535326	0.482337	0.735054	0.607581	0.581382	0.736065	0.228814	0.073721	-0.0368605	0.516047	1	chrX	intersection
split_2	Plasmablast	0.820513	0.833333	0.869565	0.844231	0.711994	0.922655	0.831522	0.700747	0.915761	0.818239	0.712304	0.905367	0.625514	0.679879	0.41178	0.843693	4	SLE	intersection
split_2	Plasmacytoid_DC	0.521739	0.7	0.269231	0.451993	0.358025	0.595151	0.571154	0.463462	0.653846	0.616778	0.552667	0.682274	0.109155	0.209471	-0.116407	0.355933	2	chrX	intersection
split_2	Plasmacytoid_DC	0.804348	0.947368	0.692308	0.826087	0.704949	0.891561	0.840385	0.738173	0.903846	0.846405	0.74818	0.916388	0.617375	0.680769	0.489809	0.803837	6	SLE	intersection
split_2	Progenitor_cell	0.65	0.666667	0.666667	0.825109	0.520522	0.772857	0.825815	0.522556	0.770677	0.788095	0.536688	0.725541	0.298246	0.650814	0.0452833	0.548432	2	chrX	intersection
split_2	Progenitor_cell	0.65	0.705882	0.571429	0.505706	0.520218	0.772879	0.535088	0.530075	0.775689	0.544444	0.541071	0.745238	0.305211	0.0764719	0.0613139	0.553134	2	SLE	intersection
split_2	B_cell_Atypical	0.6	0.64	0.64	0.578618	0.482488	0.71024	0.575	0.475	0.705	0.597222	0.543651	0.695556	0.19	0.149404	-0.051245	0.412688	5	chrX	intersection
split_2	B_cell_Atypical	0.755556	0.791667	0.76	0.800398	0.644444	0.866667	0.8	0.65	0.865	0.777778	0.645217	0.84178	0.507463	0.597614	0.298807	0.730297	5	SLE	intersection
split_2	B_cell_Memory	0.652174	0.8125	0.5	0.605731	0.52338	0.757805	0.625	0.567308	0.776923	0.64372	0.60744	0.782643	0.330909	0.253937	0.149665	0.565474	4	chrX	intersection
split_2	B_cell_Memory	0.76087	0.741935	0.884615	0.934562	0.645273	0.847311	0.930769	0.636538	0.842308	0.912053	0.643255	0.8125	0.49901	0.867396	0.29228	0.715626	6	SLE	intersection
split_2	B_cell_Naive	0.804348	1	0.653846	0.801841	0.704949	0.891561	0.826923	0.75	0.903846	0.849498	0.782609	0.916388	0.621572	0.671512	0.550482	0.803837	8	SLE	intersection
split_2	B_cell	0.777778	0.894737	0.68	0.843975	0.664358	0.867063	0.84	0.685	0.88	0.811282	0.687619	0.875556	0.563107	0.684117	0.384085	0.764601	1	chrX	intersection
split_2	B_cell	0.8	0.75	0.96	0.791069	0.69121	0.886003	0.78	0.685	0.875	0.742222	0.666797	0.833333	0.580311	0.613941	0.42781	0.790569	6	SLE	intersection
split_2	CD4_positive,_alpha_beta_T_cell	0.782609	0.807692	0.807692	0.76006	0.674693	0.870062	0.753846	0.671154	0.878846	0.736901	0.672375	0.863991	0.557692	0.511144	0.340674	0.75193	2	chrX	intersection
split_2	CD4_positive,_alpha_beta_T_cell	0.826087	0.95	0.730769	0.778468	0.734161	0.913373	0.807692	0.757692	0.917308	0.832776	0.7644	0.916388	0.657993	0.640513	0.523501	0.828268	6	SLE	intersection
split_2	CD4_T_cell_Effector_Memory	0.630435	0.846154	0.423077	0.620714	0.485563	0.7301	0.655769	0.559615	0.757692	0.673579	0.601505	0.779996	0.300537	0.329448	0.143298	0.548439	1	chrX	intersection
split_2	CD4_T_cell_Effector_Memory	0.869565	1	0.769231	0.778468	0.778468	0.935061	0.807692	0.807692	0.942308	0.832776	0.832776	0.949833	0.743494	0.640513	0.640513	0.877058	7	SLE	intersection
split_2	CD4_T_cell_Naive	0.673913	0.789474	0.576923	0.669734	0.559556	0.782609	0.694231	0.580769	0.784615	0.704308	0.61204	0.783293	0.362292	0.398957	0.16457	0.576353	2	chrX	intersection
split_2	CD4_T_cell_Naive	0.73913	0.888889	0.615385	0.824769	0.624376	0.826746	0.846154	0.655769	0.846154	0.866221	0.673579	0.862619	0.492647	0.703211	0.329448	0.703211	5	SLE	intersection
split_2	CD4_T_cell_Treg	0.695652	0.6875	0.846154	0.672809	0.567651	0.795203	0.665385	0.565385	0.780769	0.666419	0.600065	0.751792	0.358566	0.333018	0.138287	0.604853	1	chrX	intersection
split_2	CD4_T_cell_Treg	0.847826	0.88	0.846154	0.870062	0.76006	0.934939	0.873077	0.753846	0.936538	0.862598	0.740347	0.929632	0.692161	0.74048	0.511144	0.868909	8	SLE	intersection
split_2	CD8_positive,_alpha_beta_T_cell	0.76087	0.741935	0.884615	0.822636	0.658672	0.847311	0.811538	0.648077	0.842308	0.78194	0.651059	0.818779	0.49901	0.648519	0.325381	0.699569	2	chrX	intersection
split_2	CD8_positive,_alpha_beta_T_cell	0.782609	0.807692	0.807692	0.761891	0.675306	0.870062	0.765385	0.67875	0.878846	0.755853	0.67893	0.862619	0.557692	0.526235	0.371865	0.75193	6	SLE	intersection
split_2	CD8_T_cell_Cytotoxic_GZMH_	0.608696	0.722222	0.5	0.653499	0.486518	0.71806	0.651923	0.511538	0.738462	0.658793	0.571026	0.746894	0.238971	0.301536	0.0232338	0.488564	2	chrX	intersection
split_2	CD8_T_cell_Cytotoxic_GZMH_	0.826087	1	0.692308	0.778468	0.7301	0.913373	0.807692	0.769231	0.923077	0.832776	0.799331	0.93311	0.661765	0.640513	0.580119	0.839719	6	SLE	intersection
split_2	CD8_T_cell_Cytotoxic_GZMK_	0.673913	0.866667	0.5	0.645549	0.54824	0.76272	0.675	0.598077	0.788558	0.688859	0.629181	0.816054	0.37613	0.364292	0.217254	0.610089	2	chrX	intersection
split_2	CD8_T_cell_Cytotoxic_GZMK_	0.891304	0.956522	0.846154	0.891769	0.80481	0.956687	0.898077	0.821154	0.961538	0.896321	0.815426	0.966555	0.782609	0.789352	0.646675	0.916057	10	SLE	intersection
split_2	CD8_T_cell_MAIT	0.590909	1	0.25	0.531661	0.419275	0.657556	0.625	0.5625	0.708333	0.659091	0.602273	0.734848	0.232558	0.362738	0.246932	0.495074	2	chrX	intersection
split_2	CD8_T_cell_MAIT	0.818182	1	0.666667	0.790638	0.713287	0.887221	0.8125	0.75	0.896875	0.829545	0.772727	0.90625	0.645161	0.656532	0.559017	0.797698	7	SLE	intersection
split_2	CD8_T_cell_Naive	0.673913	1	0.423077	0.679041	0.534557	0.75458	0.730769	0.634615	0.788462	0.765886	0.682274	0.816054	0.389381	0.52105	0.371574	0.610089	5	SLE	intersection
split_2	Classical_monocyte	0.673913	0.823529	0.538462	0.585589	0.550167	0.782609	0.6	0.592308	0.801923	0.624714	0.622551	0.813174	0.369287	0.20136	0.198898	0.613356	1	chrX	intersection
split_2	Classical_monocyte	0.826087	1	0.692308	0.75458	0.7301	0.913373	0.788462	0.769231	0.923077	0.816054	0.799331	0.93311	0.661765	0.610089	0.580119	0.839719	7	SLE	intersection
split_2	Conventional_DC	0.565217	0.75	0.346154	0.614165	0.420468	0.659557	0.661538	0.496154	0.7	0.684075	0.563359	0.730383	0.181495	0.355696	-0.0096125	0.453089	1	chrX	intersection
split_2	Conventional_DC	0.847826	0.806452	0.961538	0.864803	0.749693	0.933917	0.85	0.736538	0.925	0.8125	0.714807	0.896552	0.681188	0.754155	0.536388	0.867396	7	SLE	intersection
split_2	Lymphocyte	0.608696	0.6	0.923077	0.479227	0.443252	0.645992	0.498077	0.484423	0.65	0.564274	0.557692	0.65	0.133891	-0.0053082	-0.0541184	0.407452	7	chrX	intersection
split_2	Lymphocyte	0.782609	0.9	0.692308	0.740119	0.674591	0.870062	0.746154	0.694231	0.884615	0.740347	0.704308	0.896321	0.572491	0.488564	0.398957	0.769231	6	SLE	intersection
split_2	natural_killer_cell	0.586957	0.684211	0.5	0.415217	0.457807	0.69571	0.459615	0.478846	0.707692	0.547659	0.555407	0.709699	0.192237	-0.0870179	-0.0447399	0.422127	8	chrX	intersection
split_2	natural_killer_cell	0.76087	0.941176	0.615385	0.913373	0.652281	0.848186	0.923077	0.694135	0.865385	0.93311	0.713907	0.882943	0.537477	0.839719	0.421182	0.735738	8	SLE	intersection
split_2	NK_cell_Bright	0.652174	0.708333	0.653846	0.544558	0.523561	0.761441	0.55	0.530769	0.765385	0.592133	0.581271	0.751792	0.30038	0.0995227	0.0615385	0.526235	2	chrX	intersection
split_2	NK_cell_Bright	0.804348	0.869565	0.769231	0.826087	0.696812	0.891769	0.823077	0.707692	0.903846	0.802933	0.707559	0.899666	0.608696	0.646154	0.418541	0.803837	10	SLE	intersection
split_2	NK_cell_Dim	0.717391	0.842105	0.615385	0.71377	0.605507	0.826087	0.738462	0.625	0.834615	0.74818	0.64372	0.829783	0.44732	0.489809	0.258303	0.664141	2	chrX	intersection
split_2	NK_cell_Dim	0.847826	1	0.730769	0.824769	0.75458	0.913373	0.846154	0.788462	0.923077	0.866221	0.816054	0.93311	0.702403	0.703211	0.610089	0.839719	9	SLE	intersection
split_2	Non_classical_monocyte	0.695652	0.833333	0.576923	0.693347	0.577562	0.801841	0.713462	0.605769	0.809615	0.7199	0.63014	0.81345	0.408088	0.433647	0.221237	0.613941	1	chrX	intersection
split_2	Non_classical_monocyte	0.913043	0.923077	0.923077	0.869565	0.847311	0.978187	0.867308	0.842308	0.975	0.847762	0.818779	0.966555	0.823077	0.734615	0.68927	0.95646	8	SLE	intersection
split_2	Plasmablast	0.589744	0.594595	0.956522	0.437552	0.412821	0.570469	0.5	0.456522	0.572011	0.589744	0.569496	0.626883	0.0219436	0	-0.193914	0.278752	1	chrX	intersection
split_2	Plasmablast	0.74359	0.882353	0.652174	0.745304	0.633903	0.847192	0.744565	0.657609	0.860054	0.75219	0.694259	0.875139	0.498715	0.482617	0.330148	0.708647	4	SLE	intersection
split_2	Plasmacytoid_DC	0.5	0.8	0.153846	0.392994	0.309426	0.530711	0.557692	0.488462	0.615385	0.615385	0.560201	0.665552	0.0926244	0.231662	-0.0405999	0.339683	2	chrX	intersection
split_2	Plasmacytoid_DC	0.73913	0.888889	0.615385	0.778468	0.620714	0.826746	0.807692	0.655769	0.846154	0.832776	0.673579	0.863036	0.492647	0.640513	0.329448	0.703211	6	SLE	intersection
split_2	Progenitor_cell	0.65	0.64	0.761905	0.514281	0.524104	0.772857	0.517544	0.522556	0.770677	0.533974	0.536688	0.717857	0.291139	0.0367359	0.0452833	0.561535	2	chrX	intersection
split_2	Progenitor_cell	0.675	0.833333	0.47619	0.71383	0.533908	0.77	0.735589	0.582707	0.783208	0.730159	0.577381	0.77483	0.362745	0.513454	0.185717	0.593023	2	SLE	intersection
split_2	B_cell_Atypical	0.644444	0.68	0.68	0.621083	0.512566	0.754818	0.615	0.515	0.75	0.622393	0.563175	0.726496	0.28	0.231393	0.0315357	0.505964	5	chrX	intersection
split_2	B_cell_Atypical	0.733333	0.842105	0.64	0.640212	0.619605	0.843367	0.66	0.635	0.845	0.664314	0.642222	0.84	0.475728	0.327968	0.273861	0.695837	5	SLE	intersection
split_2	B_cell_Memory	0.717391	0.782609	0.692308	0.632013	0.608696	0.826087	0.632692	0.613462	0.828846	0.645485	0.632487	0.815426	0.434783	0.263117	0.225197	0.652691	4	chrX	intersection
split_2	B_cell_Memory	0.630435	0.764706	0.5	0.52338	0.505184	0.73913	0.573077	0.542308	0.757692	0.60921	0.588211	0.7644	0.285192	0.16091	0.0880705	0.523501	6	SLE	intersection
split_2	B_cell_Naive	0.826087	1	0.692308	0.869565	0.7301	0.913373	0.884615	0.769231	0.923077	0.899666	0.799331	0.93311	0.661765	0.769231	0.580119	0.839719	8	SLE	intersection
split_2	B_cell	0.777778	0.894737	0.68	0.843367	0.681111	0.86693	0.86	0.7	0.87525	0.875556	0.695906	0.875556	0.563107	0.730297	0.407872	0.747897	1	chrX	intersection
split_2	B_cell	0.755556	0.71875	0.92	0.797552	0.633503	0.837643	0.79	0.635	0.82525	0.758095	0.632222	0.78403	0.487047	0.594442	0.317934	0.695701	6	SLE	intersection
split_2	CD4_positive,_alpha_beta_T_cell	0.782609	0.766667	0.884615	0.819737	0.672809	0.868548	0.805769	0.665385	0.861538	0.772941	0.663634	0.834687	0.547244	0.65885	0.372298	0.740593	2	chrX	intersection
split_2	CD4_positive,_alpha_beta_T_cell	0.847826	1	0.730769	0.847322	0.75458	0.935061	0.865385	0.788462	0.942308	0.882943	0.816054	0.949833	0.702403	0.735738	0.610089	0.877058	6	SLE	intersection
split_2	CD4_T_cell_Effector_Memory	0.673913	0.657143	0.884615	0.778295	0.528824	0.769928	0.767308	0.534615	0.755769	0.743423	0.582923	0.728753	0.300203	0.556445	0.0781575	0.562392	1	chrX	intersection
split_2	CD4_T_cell_Effector_Memory	0.73913	0.85	0.653846	0.8037	0.625699	0.826749	0.821154	0.65	0.8425	0.829783	0.658793	0.846405	0.486989	0.646675	0.301536	0.689448	7	SLE	intersection
split_2	CD4_T_cell_Naive	0.73913	0.791667	0.730769	0.716434	0.631318	0.826749	0.709615	0.632692	0.840385	0.700235	0.645485	0.829783	0.475285	0.422081	0.263117	0.680769	2	chrX	intersection
split_2	CD4_T_cell_Naive	0.782609	0.833333	0.769231	0.718059	0.689614	0.890936	0.726923	0.688462	0.886538	0.724956	0.686198	0.879064	0.562738	0.45168	0.379486	0.778333	5	SLE	intersection
split_2	CD4_T_cell_Treg	0.695652	0.6875	0.846154	0.58587	0.557469	0.795203	0.578846	0.553846	0.780769	0.607564	0.593311	0.758118	0.358566	0.178025	0.125157	0.606022	1	chrX	intersection
split_2	CD4_T_cell_Treg	0.826087	0.909091	0.769231	0.848476	0.737154	0.913375	0.853846	0.746058	0.917308	0.846154	0.740347	0.916388	0.654135	0.701646	0.488564	0.828268	8	SLE	intersection
split_2	CD8_positive,_alpha_beta_T_cell	0.73913	0.75	0.807692	0.7096	0.629183	0.826749	0.698077	0.621154	0.828846	0.687453	0.635452	0.807404	0.463035	0.418928	0.243955	0.65885	2	chrX	intersection
split_2	CD8_positive,_alpha_beta_T_cell	0.782609	0.766667	0.884615	0.7096	0.677899	0.869565	0.698077	0.670962	0.867308	0.687453	0.668574	0.846473	0.547244	0.418928	0.372934	0.754155	6	SLE	intersection
split_2	CD8_T_cell_Cytotoxic_GZMH_	0.630435	0.764706	0.5	0.672834	0.512629	0.737253	0.688462	0.547885	0.751923	0.694596	0.591919	0.763434	0.285192	0.379486	0.0989501	0.516767	2	chrX	intersection
split_2	CD8_T_cell_Cytotoxic_GZMH_	0.826087	0.875	0.807692	0.826749	0.718598	0.913373	0.828846	0.732692	0.917308	0.815426	0.724956	0.912974	0.65019	0.652691	0.468549	0.828268	6	SLE	intersection
split_2	CD8_T_cell_Cytotoxic_GZMK_	0.521739	0.833333	0.192308	0.36599	0.340211	0.565835	0.507692	0.501923	0.648077	0.569231	0.566173	0.682274	0.127586	0.0245026	0.0053082	0.371574	2	chrX	intersection
split_2	CD8_T_cell_Cytotoxic_GZMK_	0.847826	0.851852	0.884615	0.978313	0.754277	0.934562	0.980769	0.742308	0.930769	0.983278	0.728866	0.912053	0.688588	0.956949	0.511144	0.867396	10	SLE	intersection
split_2	CD8_T_cell_MAIT	0.727273	0.75	0.75	0.681818	0.612625	0.819483	0.679167	0.612292	0.825208	0.660827	0.611683	0.803182	0.45	0.358333	0.223975	0.651746	2	chrX	intersection
split_2	CD8_T_cell_MAIT	0.727273	0.833333	0.625	0.701326	0.612638	0.840498	0.716667	0.633333	0.845833	0.707665	0.635606	0.84689	0.463415	0.443135	0.283333	0.690066	7	SLE	intersection
split_2	CD8_T_cell_Naive	0.717391	0.933333	0.538462	0.679041	0.595151	0.8037	0.730769	0.648077	0.826923	0.765886	0.679673	0.849498	0.459313	0.52105	0.343792	0.671512	5	SLE	intersection
split_2	Classical_monocyte	0.673913	0.823529	0.538462	0.716456	0.550167	0.761891	0.732692	0.586538	0.788462	0.73561	0.616952	0.797107	0.369287	0.468549	0.18311	0.581243	1	chrX	intersection
split_2	Classical_monocyte	0.826087	0.875	0.807692	0.934939	0.736171	0.913043	0.936538	0.7325	0.911538	0.929632	0.722151	0.912053	0.65019	0.868909	0.468367	0.823139	7	SLE	intersection
split_2	Conventional_DC	0.565217	0.607143	0.653846	0.585558	0.447512	0.674684	0.576923	0.438365	0.6675	0.607333	0.537539	0.666532	0.105058	0.154892	-0.126402	0.340674	1	chrX	intersection
split_2	Conventional_DC	0.804348	0.947368	0.692308	0.869565	0.704949	0.891769	0.884615	0.732692	0.903846	0.899666	0.748116	0.916388	0.617375	0.769231	0.489747	0.803837	7	SLE	intersection
split_2	Lymphocyte	0.652174	0.625	0.961538	0.688465	0.479227	0.707686	0.680769	0.517308	0.7	0.671427	0.573871	0.684211	0.230126	0.451787	0.0509525	0.494608	7	chrX	intersection
split_2	Lymphocyte	0.76087	1	0.576923	0.824769	0.652281	0.847322	0.846154	0.711538	0.865385	0.866221	0.749164	0.882943	0.542495	0.703211	0.491689	0.735738	6	SLE	intersection
split_2	natural_killer_cell	0.565217	0.714286	0.384615	0.483782	0.436853	0.669889	0.559615	0.478846	0.705769	0.601505	0.555407	0.720424	0.172662	0.143298	-0.0447399	0.439257	8	chrX	intersection
split_2	natural_killer_cell	0.76087	0.894737	0.653846	0.689855	0.653491	0.869565	0.719231	0.682692	0.873077	0.732023	0.694596	0.879675	0.532348	0.456365	0.379486	0.74048	8	SLE	intersection
split_2	NK_cell_Bright	0.652174	0.65625	0.807692	0.664923	0.51225	0.749693	0.653846	0.509615	0.736538	0.655842	0.569995	0.714853	0.266932	0.325381	0.0223495	0.511211	2	chrX	intersection
split_2	NK_cell_Bright	0.826087	0.909091	0.769231	0.826746	0.718598	0.913375	0.834615	0.738462	0.917596	0.829735	0.73561	0.916388	0.654135	0.664141	0.477113	0.828841	10	SLE	intersection
split_2	NK_cell_Dim	0.695652	0.7	0.807692	0.575035	0.575569	0.801849	0.573077	0.565385	0.79625	0.604051	0.600065	0.771534	0.366142	0.175655	0.138287	0.600411	2	chrX	intersection
split_2	NK_cell_Dim	0.804348	0.904762	0.730769	0.913373	0.713579	0.891769	0.923077	0.724808	0.903846	0.93311	0.730112	0.912974	0.613084	0.839719	0.456365	0.803837	9	SLE	intersection
split_2	Non_classical_monocyte	0.695652	0.833333	0.576923	0.716456	0.576092	0.8037	0.732692	0.605769	0.809904	0.73561	0.63014	0.813346	0.408088	0.468549	0.217254	0.627758	1	chrX	intersection
split_2	Non_classical_monocyte	0.847826	1	0.730769	0.847322	0.75458	0.935061	0.865385	0.788462	0.942308	0.882943	0.816054	0.949833	0.702403	0.735738	0.610089	0.877058	8	SLE	intersection
split_2	Plasmablast	0.666667	0.857143	0.521739	0.717949	0.519951	0.770768	0.741848	0.580163	0.804348	0.763378	0.636497	0.822174	0.365457	0.483696	0.165761	0.605346	1	chrX	intersection
split_2	Plasmablast	0.74359	0.76	0.826087	0.668013	0.620316	0.847182	0.660326	0.609918	0.84409	0.685416	0.649937	0.835006	0.459834	0.31807	0.229803	0.692366	4	SLE	intersection
split_2	Plasmacytoid_DC	0.695652	0.833333	0.576923	0.71377	0.568772	0.801841	0.738462	0.61125	0.809615	0.74818	0.632487	0.815426	0.408088	0.489809	0.225197	0.627758	2	chrX	intersection
split_2	Plasmacytoid_DC	0.804348	0.869565	0.769231	0.804816	0.696812	0.891769	0.803846	0.713269	0.898077	0.787157	0.707559	0.896321	0.608696	0.604792	0.428427	0.789352	6	SLE	intersection
split_2	Progenitor_cell	0.65	0.64	0.761905	0.664103	0.512531	0.769923	0.684211	0.517544	0.76817	0.636364	0.533974	0.711172	0.291139	0.4842	0.0367359	0.551825	2	chrX	intersection
split_2	Progenitor_cell	0.6	0.857143	0.285714	0.653818	0.420228	0.676	0.68797	0.521303	0.711779	0.685714	0.538492	0.7079	0.225182	0.433555	0.0807795	0.475595	2	SLE	intersection
split_2	B_cell_Atypical	0.577778	0.666667	0.48	0.556434	0.445495	0.705934	0.56	0.465	0.715	0.588571	0.54	0.70594	0.173913	0.119523	-0.0698613	0.428071	5	chrX	intersection
split_2	B_cell_Atypical	0.755556	0.818182	0.72	0.821695	0.643231	0.86693	0.835	0.645	0.87	0.837661	0.645217	0.855845	0.512315	0.674057	0.288276	0.7356	5	SLE	intersection
split_2	B_cell_Memory	0.76087	0.727273	0.923077	0.754277	0.645273	0.843631	0.742308	0.636538	0.830769	0.721545	0.643255	0.797173	0.492986	0.512475	0.326055	0.715626	4	chrX	intersection
split_2	B_cell_Memory	0.76087	0.826087	0.730769	0.805184	0.653499	0.868548	0.809615	0.657692	0.861731	0.799331	0.664944	0.862598	0.521739	0.613941	0.312986	0.734472	6	SLE	intersection
split_2	B_cell_Naive	0.804348	0.947368	0.692308	0.847322	0.709958	0.891561	0.865385	0.732692	0.898077	0.882943	0.73561	0.899666	0.617375	0.735738	0.468549	0.789352	8	SLE	intersection
split_2	B_cell	0.6	0.818182	0.36	0.660694	0.449473	0.687967	0.685	0.535	0.72	0.689167	0.574701	0.739476	0.242991	0.384085	0.0767426	0.493542	1	chrX	intersection
split_2	B_cell	0.755556	0.888889	0.64	0.777119	0.635556	0.844754	0.79	0.665	0.855	0.786199	0.672889	0.857778	0.521739	0.583512	0.347851	0.71	6	SLE	intersection
split_2	CD4_positive,_alpha_beta_T_cell	0.73913	0.733333	0.846154	0.778295	0.622253	0.843631	0.767308	0.615385	0.830769	0.743423	0.630388	0.803156	0.456693	0.556445	0.237004	0.691262	2	chrX	intersection
split_2	CD4_positive,_alpha_beta_T_cell	0.826087	0.821429	0.884615	0.847311	0.733954	0.913043	0.842308	0.723077	0.911538	0.818779	0.707559	0.895588	0.642023	0.68927	0.464901	0.828268	6	SLE	intersection
split_2	CD4_T_cell_Effector_Memory	0.521739	0.75	0.230769	0.513193	0.352355	0.595151	0.578846	0.482692	0.653846	0.615081	0.557692	0.684745	0.118467	0.183266	-0.0509525	0.372439	1	chrX	intersection
split_2	CD4_T_cell_Effector_Memory	0.869565	1	0.769231	0.891561	0.778468	0.935061	0.903846	0.807692	0.942308	0.916388	0.832776	0.949833	0.743494	0.803837	0.640513	0.877058	7	SLE	intersection
split_2	CD4_T_cell_Naive	0.717391	0.882353	0.576923	0.693347	0.605731	0.824769	0.713462	0.642019	0.828846	0.7199	0.658505	0.846405	0.453382	0.433647	0.294203	0.671512	2	chrX	intersection
split_2	CD4_T_cell_Naive	0.826087	0.8	0.923077	0.782609	0.729606	0.912365	0.778846	0.717308	0.905769	0.761063	0.701035	0.880256	0.637795	0.557692	0.468239	0.824319	5	SLE	intersection
split_2	CD4_T_cell_Treg	0.586957	0.64	0.615385	0.608696	0.467909	0.696812	0.619231	0.463462	0.701923	0.637793	0.548196	0.694878	0.164436	0.238462	-0.0742278	0.400775	1	chrX	intersection
split_2	CD4_T_cell_Treg	0.847826	0.952381	0.769231	0.934939	0.757805	0.935061	0.936538	0.776923	0.942308	0.929632	0.780672	0.946295	0.699065	0.868909	0.557612	0.877058	8	SLE	intersection
split_2	CD8_positive,_alpha_beta_T_cell	0.76087	0.758621	0.846154	0.697216	0.653426	0.84819	0.686538	0.647981	0.848077	0.676445	0.651059	0.823021	0.504892	0.43358	0.325381	0.699569	2	chrX	intersection
split_2	CD8_positive,_alpha_beta_T_cell	0.826087	0.95	0.730769	0.801841	0.734161	0.913373	0.826923	0.757692	0.923077	0.849498	0.7644	0.93311	0.657993	0.671512	0.526098	0.839719	6	SLE	intersection
split_2	CD8_T_cell_Cytotoxic_GZMH_	0.652174	0.75	0.576923	0.631318	0.52338	0.761891	0.626923	0.542308	0.776923	0.640268	0.588211	0.77146	0.315985	0.252634	0.0877058	0.557612	2	chrX	intersection
split_2	CD8_T_cell_Cytotoxic_GZMH_	0.826087	1	0.692308	0.891561	0.7301	0.913373	0.903846	0.769231	0.923077	0.916388	0.799331	0.93311	0.661765	0.803837	0.580119	0.839719	6	SLE	intersection
split_2	CD8_T_cell_Cytotoxic_GZMK_	0.652174	0.666667	0.769231	0.600932	0.521935	0.757697	0.590385	0.515096	0.748077	0.614994	0.572774	0.728866	0.275591	0.188151	0.0332995	0.511144	2	chrX	intersection
split_2	CD8_T_cell_Cytotoxic_GZMK_	0.869565	0.954545	0.807692	0.848186	0.782609	0.935061	0.859615	0.796154	0.942308	0.863036	0.79699	0.949833	0.740602	0.715798	0.604792	0.877058	10	SLE	intersection
split_2	CD8_T_cell_MAIT	0.568182	0.777778	0.291667	0.396104	0.396104	0.64518	0.483333	0.495833	0.683333	0.537879	0.54536	0.69697	0.180392	-0.0430331	-0.00963596	0.430331	2	chrX	intersection
split_2	CD8_T_cell_MAIT	0.863636	1	0.75	0.862789	0.790638	0.931924	0.875	0.8125	0.9375	0.886364	0.829545	0.943182	0.731707	0.759555	0.656532	0.872278	7	SLE	intersection
split_2	CD8_T_cell_Naive	0.673913	1	0.423077	0.652281	0.534557	0.75458	0.711538	0.634615	0.788462	0.749164	0.682274	0.816054	0.389381	0.491689	0.371574	0.610089	5	SLE	intersection
split_2	Classical_monocyte	0.652174	0.777778	0.538462	0.601242	0.52338	0.760078	0.630769	0.555769	0.771154	0.650502	0.596433	0.779996	0.323529	0.272218	0.121578	0.548439	1	chrX	intersection
split_2	Classical_monocyte	0.847826	0.952381	0.769231	0.826087	0.757805	0.934939	0.840385	0.776923	0.936538	0.846405	0.782512	0.93311	0.699065	0.680769	0.557612	0.868909	7	SLE	intersection
split_2	Conventional_DC	0.608696	0.6	0.923077	0.485192	0.443252	0.645992	0.530769	0.480769	0.65	0.580773	0.555927	0.65	0.133891	0.123553	-0.0565293	0.398167	1	chrX	intersection
split_2	Conventional_DC	0.847826	0.913043	0.807692	0.891561	0.761435	0.934939	0.903846	0.771154	0.936538	0.916388	0.764233	0.93311	0.695652	0.803837	0.539719	0.868909	7	SLE	intersection
split_2	Lymphocyte	0.73913	0.75	0.807692	0.7096	0.629183	0.845807	0.698077	0.621154	0.836538	0.687453	0.635452	0.807404	0.463035	0.418928	0.243955	0.68927	7	chrX	intersection
split_2	Lymphocyte	0.804348	0.84	0.807692	0.847311	0.71377	0.891769	0.842308	0.709615	0.898077	0.818779	0.700897	0.895549	0.604207	0.68927	0.422081	0.789352	6	SLE	intersection
split_2	natural_killer_cell	0.717391	0.882353	0.576923	0.659557	0.605507	0.824769	0.705769	0.642308	0.834615	0.730383	0.658505	0.846405	0.453382	0.453089	0.294203	0.671512	8	chrX	intersection
split_2	natural_killer_cell	0.782609	0.9	0.692308	0.761435	0.684813	0.870059	0.771154	0.701923	0.879135	0.76732	0.709699	0.882943	0.572491	0.539719	0.415385	0.752795	8	SLE	intersection
split_2	NK_cell_Bright	0.652174	0.8125	0.5	0.689855	0.530711	0.760078	0.719231	0.578846	0.776923	0.732023	0.61204	0.783293	0.330909	0.456365	0.164083	0.576353	2	chrX	intersection
split_2	NK_cell_Bright	0.804348	1	0.653846	0.801841	0.704949	0.891561	0.826923	0.75	0.903846	0.849498	0.782609	0.916388	0.621572	0.671512	0.550482	0.803837	10	SLE	intersection
split_2	NK_cell_Dim	0.73913	0.769231	0.769231	0.718598	0.632013	0.847311	0.721154	0.634519	0.842308	0.715719	0.643255	0.829735	0.469231	0.438529	0.274977	0.691341	2	chrX	intersection
split_2	NK_cell_Dim	0.869565	1	0.769231	0.824769	0.778468	0.935061	0.846154	0.807692	0.942308	0.866221	0.832776	0.949833	0.743494	0.703211	0.640513	0.877058	9	SLE	intersection
split_2	Non_classical_monocyte	0.673913	0.761905	0.615385	0.652174	0.559425	0.783432	0.663462	0.572885	0.796154	0.671823	0.60744	0.792101	0.35514	0.326923	0.149618	0.592308	1	chrX	intersection
split_2	Non_classical_monocyte	0.869565	0.954545	0.807692	0.891769	0.782609	0.936117	0.898077	0.801731	0.942692	0.896321	0.799331	0.949833	0.740602	0.789352	0.609824	0.878782	8	SLE	intersection
split_2	Plasmablast	0.692308	0.666667	0.956522	0.697088	0.526179	0.752163	0.675272	0.53125	0.728261	0.690412	0.605263	0.72709	0.297297	0.409246	0.0926847	0.560761	1	chrX	intersection
split_2	Plasmablast	0.871795	0.875	0.913043	0.866209	0.771055	0.948718	0.84375	0.769022	0.947011	0.821429	0.761427	0.946488	0.73251	0.751487	0.563053	0.897218	4	SLE	intersection
split_2	Plasmacytoid_DC	0.586957	0.666667	0.538462	0.585589	0.457821	0.696812	0.6	0.472885	0.707692	0.624714	0.552722	0.709699	0.183178	0.20136	-0.0556129	0.415562	2	chrX	intersection
split_2	Plasmacytoid_DC	0.826087	1	0.692308	0.824769	0.7301	0.913373	0.846154	0.769231	0.923077	0.866221	0.799331	0.93311	0.661765	0.703211	0.580119	0.839719	6	SLE	intersection
split_2	Progenitor_cell	0.625	0.625	0.714286	0.593862	0.484375	0.75	0.593985	0.493609	0.749373	0.578571	0.521843	0.705499	0.242424	0.193892	-0.0132151	0.503777	2	chrX	intersection
split_2	Progenitor_cell	0.625	0.6875	0.52381	0.570993	0.5	0.746212	0.580201	0.522556	0.752005	0.572619	0.536688	0.72402	0.257426	0.163504	0.0452833	0.51395	2	SLE	intersection
split_2	B_cell_Atypical	0.6	0.684211	0.52	0.384774	0.465086	0.711969	0.45	0.48	0.72525	0.535354	0.546144	0.719034	0.213592	-0.115624	-0.040996	0.46	5	chrX	intersection
split_2	B_cell_Atypical	0.777778	0.894737	0.68	0.844444	0.664358	0.86693	0.855	0.685	0.875	0.855333	0.689167	0.875556	0.563107	0.71	0.384085	0.747018	5	SLE	intersection
split_2	B_cell_Memory	0.73913	0.769231	0.769231	0.737096	0.631318	0.84819	0.728846	0.628846	0.848077	0.714465	0.640268	0.831572	0.469231	0.464901	0.263117	0.692831	4	chrX	intersection
split_2	B_cell_Memory	0.76087	0.741935	0.884615	0.840714	0.650633	0.864803	0.825	0.642308	0.85	0.787879	0.646536	0.818779	0.49901	0.715626	0.325381	0.734465	6	SLE	intersection
split_2	B_cell_Naive	0.847826	0.88	0.846154	0.868548	0.759947	0.934562	0.861538	0.753846	0.930769	0.834687	0.740347	0.928571	0.692161	0.734465	0.511144	0.867396	8	SLE	intersection
split_2	B_cell	0.777778	0.894737	0.68	0.705934	0.667607	0.867063	0.73	0.69	0.88	0.734444	0.689167	0.876313	0.563107	0.477512	0.388449	0.764601	1	chrX	intersection
split_2	B_cell	0.777778	0.941176	0.64	0.747444	0.675664	0.86693	0.78	0.705	0.88	0.804444	0.717244	0.893333	0.567308	0.601074	0.442719	0.764601	6	SLE	intersection
split_2	CD4_positive,_alpha_beta_T_cell	0.76087	0.758621	0.846154	0.801752	0.649252	0.84819	0.792308	0.640096	0.848077	0.766809	0.646484	0.818991	0.504892	0.600411	0.28503	0.701646	2	chrX	intersection
split_2	CD4_positive,_alpha_beta_T_cell	0.804348	0.947368	0.692308	0.847322	0.704949	0.891561	0.865385	0.732692	0.903846	0.882943	0.746894	0.916388	0.617375	0.735738	0.489747	0.803837	6	SLE	intersection
split_2	CD4_T_cell_Effector_Memory	0.630435	0.846154	0.423077	0.693347	0.486848	0.7301	0.713462	0.565385	0.757692	0.7199	0.60786	0.779996	0.300537	0.433647	0.16091	0.548439	1	chrX	intersection
split_2	CD4_T_cell_Effector_Memory	0.869565	1	0.769231	0.935061	0.801841	0.935061	0.942308	0.826923	0.942308	0.949833	0.849498	0.949833	0.743494	0.877058	0.671512	0.877058	7	SLE	intersection
split_2	CD4_T_cell_Naive	0.76087	0.826087	0.730769	0.718598	0.652174	0.84948	0.721154	0.657692	0.861538	0.715719	0.664962	0.862598	0.521739	0.438529	0.312986	0.734465	2	chrX	intersection
split_2	CD4_T_cell_Naive	0.73913	0.85	0.653846	0.695652	0.625699	0.847311	0.707692	0.651827	0.84625	0.709699	0.658793	0.846405	0.486989	0.415385	0.301536	0.692831	5	SLE	intersection
split_2	CD4_T_cell_Treg	0.673913	0.677419	0.807692	0.631884	0.539855	0.778295	0.623077	0.532692	0.767308	0.634468	0.582064	0.743423	0.316832	0.277893	0.0693375	0.557692	1	chrX	intersection
split_2	CD4_T_cell_Treg	0.847826	0.913043	0.807692	0.913375	0.761441	0.934939	0.917308	0.771154	0.936538	0.912974	0.766688	0.93311	0.695652	0.828268	0.539719	0.868909	8	SLE	intersection
split_2	CD8_positive,_alpha_beta_T_cell	0.717391	0.882353	0.576923	0.693347	0.605731	0.80481	0.713462	0.642115	0.826923	0.7199	0.658505	0.833445	0.453382	0.433647	0.294203	0.66451	2	chrX	intersection
split_2	CD8_positive,_alpha_beta_T_cell	0.826087	0.909091	0.769231	0.8037	0.73913	0.913373	0.821154	0.751923	0.917308	0.829783	0.745819	0.916388	0.654135	0.646675	0.503846	0.828268	6	SLE	intersection
split_2	CD8_T_cell_Cytotoxic_GZMH_	0.608696	0.833333	0.384615	0.679041	0.46683	0.709958	0.730769	0.540385	0.744231	0.765886	0.588629	0.763434	0.263345	0.52105	0.100931	0.516542	2	chrX	intersection
split_2	CD8_T_cell_Cytotoxic_GZMH_	0.847826	1	0.730769	0.847322	0.75458	0.935061	0.865385	0.788462	0.942308	0.882943	0.816054	0.949833	0.702403	0.735738	0.610089	0.877058	6	SLE	intersection
split_2	CD8_T_cell_Cytotoxic_GZMK_	0.717391	0.809524	0.653846	0.693347	0.610104	0.826746	0.713462	0.619231	0.829135	0.7199	0.637793	0.829735	0.441121	0.433647	0.243681	0.664141	2	chrX	intersection
split_2	CD8_T_cell_Cytotoxic_GZMK_	0.869565	0.954545	0.807692	0.934939	0.783437	0.935061	0.936538	0.803846	0.942308	0.929632	0.799331	0.949833	0.740602	0.868909	0.613356	0.877058	10	SLE	intersection
split_2	CD8_T_cell_MAIT	0.613636	0.818182	0.375	0.589267	0.463034	0.713287	0.6375	0.541667	0.741667	0.647727	0.568765	0.752976	0.26087	0.316228	0.096441	0.525614	2	chrX	intersection
split_2	CD8_T_cell_MAIT	0.886364	1	0.791667	0.909091	0.815152	0.95464	0.916667	0.833333	0.958333	0.924242	0.848485	0.962121	0.77551	0.833333	0.690066	0.912871	7	SLE	intersection
split_2	CD8_T_cell_Naive	0.673913	0.823529	0.538462	0.556936	0.541943	0.780962	0.586538	0.580769	0.796154	0.616952	0.615081	0.799331	0.369287	0.180144	0.180144	0.592308	5	SLE	intersection
split_2	Classical_monocyte	0.673913	0.823529	0.538462	0.674684	0.556597	0.780962	0.682692	0.586538	0.796442	0.686256	0.616952	0.813174	0.369287	0.363641	0.180144	0.610252	1	chrX	intersection
split_2	Classical_monocyte	0.847826	1	0.730769	0.847322	0.75458	0.935061	0.865385	0.788462	0.942308	0.882943	0.816054	0.949833	0.702403	0.735738	0.610089	0.877058	7	SLE	intersection
split_2	Conventional_DC	0.586957	0.606061	0.769231	0.58587	0.448823	0.678231	0.578846	0.451923	0.673077	0.607564	0.543008	0.666768	0.124248	0.178025	-0.103593	0.377761	1	chrX	intersection
split_2	Conventional_DC	0.826087	1	0.692308	0.801841	0.7301	0.913373	0.826923	0.769231	0.923077	0.849498	0.799331	0.93311	0.661765	0.671512	0.580119	0.839719	7	SLE	intersection
split_2	Lymphocyte	0.652174	0.777778	0.538462	0.605731	0.52338	0.760078	0.625	0.555769	0.776923	0.64372	0.595846	0.780672	0.323529	0.253937	0.112297	0.557612	7	chrX	intersection
split_2	Lymphocyte	0.782609	0.944444	0.653846	0.780962	0.669734	0.870059	0.801923	0.707596	0.884615	0.813174	0.7199	0.899666	0.577206	0.613356	0.433647	0.769231	6	SLE	intersection
split_2	natural_killer_cell	0.586957	0.577778	1	0.45537	0.408213	0.539382	0.525	0.5	0.575	0.577778	0.565217	0.604651	0.0561555	0.169967	0	0.301161	8	chrX	intersection
split_2	natural_killer_cell	0.782609	0.944444	0.653846	0.8037	0.679041	0.870059	0.821154	0.713462	0.884615	0.829783	0.730112	0.899666	0.577206	0.646675	0.453018	0.769231	8	SLE	intersection
split_2	NK_cell_Bright	0.673913	0.72	0.692308	0.645273	0.561919	0.783437	0.634615	0.557692	0.7925	0.643255	0.59609	0.776628	0.340344	0.280224	0.115385	0.592308	2	chrX	intersection
split_2	NK_cell_Bright	0.826087	0.846154	0.846154	0.824731	0.737096	0.913375	0.817308	0.728846	0.917308	0.791866	0.71479	0.912053	0.646154	0.64461	0.464901	0.828268	10	SLE	intersection
split_2	NK_cell_Dim	0.717391	0.842105	0.615385	0.601242	0.601242	0.826087	0.630769	0.625	0.840385	0.650502	0.64372	0.846154	0.44732	0.272218	0.253937	0.680769	2	chrX	intersection
split_2	NK_cell_Dim	0.826087	1	0.692308	0.824769	0.7301	0.913373	0.846154	0.769231	0.923077	0.866221	0.799331	0.93311	0.661765	0.703211	0.580119	0.839719	9	SLE	intersection
split_2	Non_classical_monocyte	0.695652	0.833333	0.576923	0.689855	0.576092	0.8037	0.719231	0.605769	0.815385	0.732023	0.63014	0.815426	0.408088	0.456365	0.221446	0.627758	1	chrX	intersection
split_2	Non_classical_monocyte	0.891304	0.956522	0.846154	0.869565	0.805184	0.956687	0.884615	0.821154	0.961538	0.899666	0.815426	0.966555	0.782609	0.769231	0.646675	0.916057	8	SLE	intersection
split_2	Plasmablast	0.692308	0.866667	0.565217	0.656921	0.55893	0.7965	0.70788	0.604484	0.826087	0.746098	0.652453	0.850073	0.409091	0.443093	0.217203	0.65938	1	chrX	intersection
split_2	Plasmablast	0.769231	0.818182	0.782609	0.897436	0.643875	0.872817	0.894022	0.648098	0.881793	0.88493	0.676623	0.869624	0.527591	0.788043	0.291481	0.751434	4	SLE	intersection
split_2	Plasmacytoid_DC	0.478261	1	0.0769231	0.352484	0.263505	0.43123	0.538462	0.5	0.576923	0.598662	0.565217	0.632107	0.0675676	0.186989	0	0.270666	2	chrX	intersection
split_2	Plasmacytoid_DC	0.826087	0.821429	0.884615	0.824731	0.733954	0.912365	0.817308	0.723077	0.905769	0.791866	0.707469	0.880256	0.642023	0.64461	0.464901	0.823077	6	SLE	intersection
split_2	Progenitor_cell	0.7	0.846154	0.52381	0.690793	0.565556	0.798997	0.709273	0.606391	0.809524	0.693223	0.592302	0.802249	0.410319	0.446248	0.225282	0.659124	2	chrX	intersection
split_2	Progenitor_cell	0.625	0.875	0.333333	0.573899	0.453571	0.707077	0.642857	0.542607	0.735589	0.660714	0.551984	0.730159	0.271845	0.39958	0.119173	0.513454	2	SLE	intersection
split_2	B_cell_Atypical	0.688889	0.73913	0.68	0.711969	0.577778	0.800408	0.715	0.57975	0.805	0.703232	0.600629	0.789697	0.376238	0.427443	0.158566	0.606373	14	chrX	combined
split_2	B_cell_Atypical	0.777778	0.941176	0.64	0.726667	0.675664	0.86693	0.755	0.71	0.88	0.767111	0.717333	0.893333	0.567308	0.537587	0.442719	0.764601	14	SLE	combined
split_2	B_cell_Memory	0.673913	0.761905	0.615385	0.629212	0.556936	0.783437	0.644231	0.569231	0.798269	0.657631	0.603527	0.787157	0.35514	0.290423	0.137409	0.604792	13	chrX	combined
split_2	B_cell_Memory	0.826087	0.909091	0.769231	0.73913	0.73913	0.913373	0.751923	0.751923	0.917308	0.751421	0.745819	0.916388	0.654135	0.503846	0.503846	0.828268	20	SLE	combined
split_2	B_cell_Naive	0.630435	0.655172	0.730769	0.449311	0.510887	0.737096	0.438462	0.501923	0.728846	0.537539	0.566165	0.714465	0.234834	-0.126402	0.0040032	0.468289	4	chrX	combined
split_2	B_cell_Naive	0.826087	0.909091	0.769231	0.805184	0.737154	0.913375	0.809615	0.746154	0.917308	0.799331	0.748116	0.916388	0.654135	0.613941	0.503846	0.828268	16	SLE	combined
split_2	B_cell	0.755556	0.733333	0.88	0.773663	0.63786	0.862045	0.765	0.635	0.85	0.734253	0.632222	0.811282	0.492308	0.550176	0.316228	0.73	7	chrX	combined
split_2	B_cell	0.822222	0.869565	0.8	0.867063	0.731444	0.911111	0.87	0.73	0.91	0.855845	0.712	0.893333	0.643564	0.7356	0.46	0.821584	18	SLE	combined
split_2	CD4_positive,_alpha_beta_T_cell	0.652174	0.916667	0.423077	0.595151	0.517594	0.75458	0.636538	0.598077	0.776923	0.658505	0.632585	0.799331	0.345196	0.294203	0.235901	0.580119	4	chrX	combined
split_2	CD4_positive,_alpha_beta_T_cell	0.782609	0.863636	0.730769	0.782609	0.674684	0.891561	0.796154	0.690288	0.892308	0.79699	0.693144	0.895549	0.567669	0.592308	0.380769	0.78087	19	SLE	combined
split_2	CD4_T_cell_Effector_Memory	0.586957	0.818182	0.346154	0.659557	0.436569	0.679041	0.705769	0.534615	0.713462	0.730383	0.584372	0.732441	0.226549	0.453089	0.0804582	0.46225	3	chrX	combined
split_2	CD4_T_cell_Effector_Memory	0.847826	1	0.730769	0.824769	0.75458	0.935061	0.846154	0.788462	0.942308	0.866221	0.816054	0.949833	0.702403	0.703211	0.610089	0.877058	14	SLE	combined
split_2	CD4_T_cell_Naive	0.717391	0.69697	0.884615	0.845807	0.594409	0.815942	0.836538	0.592308	0.8	0.807404	0.615113	0.766809	0.400802	0.691262	0.227965	0.64461	5	chrX	combined
split_2	CD4_T_cell_Naive	0.804348	0.774194	0.923077	0.798954	0.704183	0.889862	0.786538	0.692308	0.880769	0.758118	0.681768	0.850652	0.590099	0.606022	0.423448	0.782114	17	SLE	combined
split_2	CD4_T_cell_Treg	0.586957	0.769231	0.384615	0.561924	0.436853	0.679041	0.580769	0.515385	0.711635	0.61204	0.573244	0.732023	0.218247	0.164083	0.0369085	0.456365	5	chrX	combined
split_2	CD4_T_cell_Treg	0.891304	0.888889	0.923077	0.845807	0.804816	0.956522	0.836538	0.803654	0.955769	0.807404	0.776415	0.946295	0.777563	0.691262	0.604792	0.914174	18	SLE	combined
split_2	CD8_positive,_alpha_beta_T_cell	0.804348	0.947368	0.692308	0.757805	0.709958	0.891561	0.782692	0.732692	0.903846	0.796577	0.748116	0.912974	0.617375	0.58066	0.489747	0.803837	7	chrX	combined
split_2	CD8_positive,_alpha_beta_T_cell	0.891304	1	0.807692	0.913373	0.824769	0.956687	0.923077	0.846154	0.961538	0.93311	0.866221	0.966555	0.785047	0.839719	0.703211	0.916057	21	SLE	combined
split_2	CD8_T_cell_Cytotoxic_GZMH_	0.673913	0.648649	0.923077	0.578422	0.523722	0.743798	0.586538	0.536538	0.730769	0.611526	0.583816	0.708552	0.291581	0.238869	0.116387	0.562331	4	chrX	combined
split_2	CD8_T_cell_Cytotoxic_GZMH_	0.847826	0.913043	0.807692	0.780962	0.760078	0.934939	0.801923	0.765385	0.936538	0.813174	0.755853	0.93311	0.695652	0.613356	0.526235	0.868909	25	SLE	combined
split_2	CD8_T_cell_Cytotoxic_GZMK_	0.630435	0.628571	0.846154	0.610248	0.48053	0.716447	0.611538	0.484615	0.705769	0.626474	0.557785	0.689474	0.206897	0.291756	-0.0356221	0.468239	2	chrX	combined
split_2	CD8_T_cell_Cytotoxic_GZMK_	0.891304	0.956522	0.846154	0.870062	0.823754	0.956687	0.873077	0.826731	0.961538	0.862598	0.82902	0.966555	0.782609	0.74048	0.65239	0.916057	22	SLE	combined
split_2	CD8_T_cell_MAIT	0.75	0.882353	0.625	0.679842	0.630303	0.841157	0.691667	0.658125	0.854167	0.680976	0.655574	0.86572	0.510121	0.388217	0.329622	0.724356	6	chrX	combined
split_2	CD8_T_cell_MAIT	0.909091	1	0.833333	0.977308	0.839175	0.977308	0.979167	0.854167	0.979167	0.981061	0.867424	0.981061	0.819672	0.955353	0.724356	0.955353	23	SLE	combined
split_2	CD8_T_cell_Naive	0.586957	0.818182	0.346154	0.559556	0.436569	0.679041	0.623077	0.532692	0.719231	0.652782	0.584372	0.746959	0.226549	0.286074	0.0804582	0.485064	1	chrX	combined
split_2	CD8_T_cell_Naive	0.826087	0.8	0.923077	0.754277	0.729606	0.913043	0.742308	0.717308	0.911538	0.721545	0.701035	0.895549	0.637795	0.512475	0.464901	0.832666	12	SLE	combined
split_2	Classical_monocyte	0.76087	0.826087	0.730769	0.826087	0.652174	0.869565	0.840385	0.651923	0.867308	0.846405	0.664744	0.863036	0.521739	0.680769	0.308106	0.734615	3	chrX	combined
split_2	Classical_monocyte	0.891304	0.92	0.884615	0.869565	0.805184	0.956687	0.867308	0.815192	0.961538	0.847762	0.799331	0.966555	0.780115	0.734615	0.627758	0.916057	29	SLE	combined
split_2	Conventional_DC	0.673913	0.648649	0.923077	0.688465	0.524297	0.743798	0.680769	0.542308	0.730769	0.671427	0.586914	0.708552	0.291581	0.451787	0.11678	0.536388	10	chrX	combined
split_2	Conventional_DC	0.826087	0.846154	0.846154	0.73913	0.718598	0.913043	0.751923	0.717308	0.911538	0.751421	0.707559	0.896333	0.646154	0.503846	0.438529	0.824517	17	SLE	combined
split_2	Lymphocyte	0.717391	0.842105	0.615385	0.620714	0.601242	0.826746	0.655769	0.625	0.834615	0.673579	0.64372	0.832776	0.44732	0.329448	0.258303	0.671512	22	chrX	combined
split_2	Lymphocyte	0.869565	0.884615	0.884615	0.891564	0.782524	0.934939	0.892308	0.778558	0.936538	0.879064	0.761063	0.929632	0.734615	0.78087	0.557692	0.872966	33	SLE	combined
split_2	natural_killer_cell	0.717391	0.76	0.730769	0.695652	0.608696	0.824799	0.690385	0.607692	0.817596	0.686198	0.627648	0.802933	0.428298	0.380769	0.213747	0.646154	21	chrX	combined
split_2	natural_killer_cell	0.826087	0.846154	0.846154	0.891561	0.729606	0.913375	0.903846	0.726731	0.917308	0.916388	0.714465	0.912053	0.646154	0.803837	0.464372	0.828268	39	SLE	combined
split_2	NK_cell_Bright	0.804348	0.869565	0.769231	0.685117	0.71377	0.891769	0.725	0.715385	0.903846	0.746894	0.707559	0.896321	0.608696	0.484814	0.428713	0.803837	8	chrX	combined
split_2	NK_cell_Bright	0.826087	1	0.692308	0.801841	0.7301	0.913373	0.826923	0.769231	0.923077	0.849498	0.799331	0.93311	0.661765	0.671512	0.580119	0.839719	24	SLE	combined
split_2	NK_cell_Dim	0.804348	0.814815	0.846154	0.757697	0.7096	0.891564	0.748077	0.698077	0.892308	0.728866	0.693144	0.879064	0.599613	0.509559	0.418707	0.782114	6	chrX	combined
split_2	NK_cell_Dim	0.847826	0.952381	0.769231	0.891561	0.760078	0.913375	0.903846	0.782692	0.923077	0.916388	0.783293	0.93311	0.699065	0.803837	0.576353	0.839719	27	SLE	combined
split_2	Non_classical_monocyte	0.76087	0.894737	0.653846	0.80481	0.652042	0.848476	0.815385	0.680577	0.865385	0.813346	0.688859	0.882943	0.532348	0.627758	0.364292	0.735738	3	chrX	combined
split_2	Non_classical_monocyte	0.891304	0.862069	0.961538	0.956522	0.815942	0.956522	0.955769	0.8	0.955769	0.946295	0.766704	0.946295	0.774951	0.911538	0.646154	0.914174	23	SLE	combined
split_2	Plasmablast	0.615385	0.7	0.608696	0.643875	0.489204	0.745304	0.648098	0.482337	0.754076	0.679282	0.581382	0.763392	0.227213	0.291481	-0.0368605	0.500064	4	chrX	combined
split_2	Plasmablast	0.74359	0.809524	0.73913	0.643875	0.636538	0.847375	0.648098	0.626359	0.860054	0.679282	0.663419	0.851914	0.48	0.291481	0.249352	0.709874	15	SLE	combined
split_2	Plasmacytoid_DC	0.695652	0.65	1	0.645992	0.539382	0.763908	0.65	0.575	0.75	0.65	0.604651	0.722222	0.32636	0.441588	0.301161	0.600925	7	chrX	combined
split_2	Plasmacytoid_DC	0.826087	0.8	0.923077	0.819737	0.723913	0.912365	0.805769	0.711538	0.905769	0.772941	0.695062	0.880256	0.637795	0.65885	0.464901	0.824319	21	SLE	combined
split_2	Progenitor_cell	0.6	0.777778	0.333333	0.547301	0.442308	0.690793	0.587719	0.516291	0.714286	0.583333	0.533844	0.728571	0.221411	0.202326	0.0428204	0.512516	18	chrX	combined
split_2	Progenitor_cell	0.725	0.678571	0.904762	0.642523	0.587526	0.823333	0.660401	0.610276	0.820802	0.620238	0.587202	0.76627	0.438776	0.400501	0.246655	0.688247	19	SLE	combined
split_2	B_cell_Atypical	0.6	0.64	0.64	0.595238	0.468254	0.712575	0.615	0.47	0.72025	0.627712	0.541587	0.703704	0.19	0.235727	-0.0597614	0.456435	14	chrX	combined
split_2	B_cell_Atypical	0.733333	0.933333	0.56	0.747444	0.611483	0.822574	0.78	0.66	0.84	0.804444	0.679978	0.857778	0.485714	0.601074	0.370521	0.696932	14	SLE	combined
split_2	B_cell_Memory	0.695652	0.75	0.692308	0.804816	0.585589	0.804816	0.803846	0.582692	0.809615	0.787157	0.611237	0.79699	0.387833	0.604792	0.164595	0.613941	13	chrX	combined
split_2	B_cell_Memory	0.847826	0.913043	0.807692	0.935061	0.76006	0.934939	0.942308	0.759615	0.936538	0.949833	0.755853	0.93311	0.695652	0.877058	0.523501	0.868909	20	SLE	combined
split_2	B_cell_Naive	0.652174	0.708333	0.653846	0.664923	0.523561	0.761891	0.653846	0.530769	0.771154	0.655842	0.581271	0.756113	0.30038	0.325381	0.0615385	0.540155	4	chrX	combined
split_2	B_cell_Naive	0.891304	0.956522	0.846154	0.891769	0.805184	0.956687	0.898077	0.826731	0.961538	0.896321	0.818779	0.966555	0.782609	0.789352	0.65239	0.916057	16	SLE	combined
split_2	B_cell	0.777778	0.8	0.8	0.844754	0.665661	0.867063	0.845	0.66	0.87	0.823889	0.654017	0.855845	0.55	0.687256	0.327757	0.7356	7	chrX	combined
split_2	B_cell	0.777778	0.894737	0.68	0.751175	0.675664	0.86693	0.775	0.695	0.875	0.784722	0.695889	0.875556	0.563107	0.570938	0.402422	0.747018	18	SLE	combined
split_2	CD4_positive,_alpha_beta_T_cell	0.73913	0.85	0.653846	0.740124	0.629212	0.848186	0.740385	0.644231	0.853846	0.7307	0.664508	0.847849	0.486989	0.477113	0.307777	0.701646	4	chrX	combined
split_2	CD4_positive,_alpha_beta_T_cell	0.826087	0.875	0.807692	0.891561	0.73913	0.913373	0.903846	0.740385	0.917308	0.916388	0.7307	0.912053	0.65019	0.803837	0.477113	0.828268	19	SLE	combined
split_2	CD4_T_cell_Effector_Memory	0.695652	0.8	0.615385	0.587933	0.581664	0.80481	0.594231	0.6	0.815385	0.619844	0.624714	0.813346	0.401487	0.187562	0.20136	0.627758	3	chrX	combined
split_2	CD4_T_cell_Effector_Memory	0.891304	1	0.807692	0.913373	0.801841	0.956687	0.923077	0.826923	0.961538	0.93311	0.849498	0.966555	0.785047	0.839719	0.671512	0.916057	14	SLE	combined
split_2	CD4_T_cell_Naive	0.608696	0.833333	0.384615	0.679041	0.459847	0.704949	0.730769	0.546154	0.73875	0.765886	0.593884	0.7644	0.263345	0.52105	0.121578	0.52105	5	chrX	combined
split_2	CD4_T_cell_Naive	0.782609	0.833333	0.769231	0.803685	0.674693	0.870062	0.798077	0.676923	0.878846	0.776415	0.67893	0.879064	0.562738	0.600207	0.350823	0.75193	17	SLE	combined
split_2	CD4_T_cell_Treg	0.673913	0.666667	0.846154	0.645273	0.539855	0.769928	0.634615	0.540385	0.755769	0.643255	0.586068	0.728866	0.308617	0.280224	0.0870179	0.562331	5	chrX	combined
split_2	CD4_T_cell_Treg	0.891304	0.956522	0.846154	0.848186	0.805184	0.956687	0.859615	0.823077	0.961538	0.863036	0.815426	0.966555	0.782609	0.715798	0.646675	0.916057	18	SLE	combined
split_2	CD8_positive,_alpha_beta_T_cell	0.804348	0.869565	0.769231	0.826749	0.71377	0.891769	0.828846	0.715385	0.898077	0.815426	0.715656	0.896321	0.608696	0.652691	0.433647	0.789352	7	chrX	combined
split_2	CD8_positive,_alpha_beta_T_cell	0.847826	0.851852	0.884615	0.782609	0.754277	0.934562	0.778846	0.747981	0.930769	0.761063	0.730608	0.912974	0.688588	0.557692	0.509559	0.867396	21	SLE	combined
split_2	CD8_T_cell_Cytotoxic_GZMH_	0.630435	0.714286	0.576923	0.625699	0.502089	0.740124	0.65	0.511538	0.753846	0.664962	0.571026	0.751421	0.269159	0.308106	0.0232338	0.511144	4	chrX	combined
split_2	CD8_T_cell_Cytotoxic_GZMH_	0.847826	0.952381	0.769231	0.847322	0.757805	0.935061	0.865385	0.776923	0.942308	0.882943	0.780672	0.949833	0.699065	0.735738	0.564537	0.877058	25	SLE	combined
split_2	CD8_T_cell_Cytotoxic_GZMK_	0.673913	0.866667	0.5	0.7301	0.54824	0.780962	0.769231	0.598077	0.801923	0.799331	0.629181	0.813174	0.37613	0.580119	0.221446	0.613356	2	chrX	combined
split_2	CD8_T_cell_Cytotoxic_GZMK_	0.891304	0.888889	0.923077	0.76006	0.804816	0.956522	0.753846	0.803846	0.955769	0.736901	0.776415	0.946295	0.777563	0.511144	0.617623	0.914174	22	SLE	combined
split_2	CD8_T_cell_MAIT	0.590909	0.875	0.291667	0.692489	0.404762	0.657556	0.725	0.533333	0.704167	0.734266	0.565657	0.715909	0.226562	0.491112	0.104975	0.46291	6	chrX	combined
split_2	CD8_T_cell_MAIT	0.818182	0.944444	0.708333	0.771316	0.71866	0.909091	0.783333	0.7375	0.9125	0.774411	0.732147	0.905303	0.642276	0.573886	0.491112	0.821584	23	SLE	combined
split_2	CD8_T_cell_Naive	0.652174	0.75	0.576923	0.695652	0.537628	0.761464	0.707692	0.548077	0.776923	0.709699	0.592093	0.77146	0.315985	0.415385	0.0995227	0.557612	1	chrX	combined
split_2	CD8_T_cell_Naive	0.826087	0.95	0.730769	0.75458	0.737154	0.913373	0.788462	0.757692	0.923077	0.816054	0.7644	0.93311	0.657993	0.610089	0.523501	0.839719	12	SLE	combined
split_2	Classical_monocyte	0.73913	0.818182	0.692308	0.740119	0.629212	0.847311	0.746154	0.638462	0.842308	0.740347	0.651218	0.831572	0.481203	0.488564	0.275601	0.68937	3	chrX	combined
split_2	Classical_monocyte	0.891304	1	0.807692	0.891561	0.824769	0.956687	0.903846	0.846154	0.961538	0.916388	0.866221	0.966555	0.785047	0.803837	0.703211	0.916057	29	SLE	combined
split_2	Conventional_DC	0.652174	0.647059	0.846154	0.544846	0.510887	0.736394	0.561538	0.509615	0.725	0.597324	0.569995	0.707469	0.258065	0.181164	0.0223495	0.511211	10	chrX	combined
split_2	Conventional_DC	0.869565	0.857143	0.923077	0.956183	0.778295	0.934939	0.95	0.767308	0.936538	0.928571	0.743423	0.929632	0.731518	0.914174	0.557692	0.872966	17	SLE	combined
split_2	Lymphocyte	0.652174	0.65625	0.807692	0.68454	0.522141	0.754277	0.673077	0.521154	0.742308	0.668687	0.575898	0.721545	0.266932	0.372934	0.0447399	0.520841	22	chrX	combined
split_2	Lymphocyte	0.804348	0.947368	0.692308	0.891561	0.709958	0.891564	0.903846	0.738462	0.903846	0.916388	0.74818	0.913145	0.617375	0.803837	0.489809	0.803837	33	SLE	combined
split_2	natural_killer_cell	0.608696	0.666667	0.615385	0.478261	0.493366	0.718067	0.469231	0.488462	0.721154	0.55081	0.559643	0.714528	0.212928	-0.0615385	-0.0232338	0.438529	21	chrX	combined
split_2	natural_killer_cell	0.847826	0.88	0.846154	0.869565	0.76006	0.934562	0.867308	0.753846	0.930769	0.847762	0.743269	0.929632	0.692161	0.734615	0.511144	0.867396	39	SLE	combined
split_2	NK_cell_Bright	0.73913	0.75	0.807692	0.805184	0.629183	0.826749	0.809615	0.621154	0.828846	0.799331	0.635452	0.807404	0.463035	0.613941	0.243955	0.659114	8	chrX	combined
split_2	NK_cell_Bright	0.826087	0.909091	0.769231	0.826749	0.737154	0.913375	0.828846	0.740385	0.917308	0.815426	0.73561	0.916388	0.654135	0.652691	0.477113	0.828268	24	SLE	combined
split_2	NK_cell_Dim	0.73913	0.791667	0.730769	0.716456	0.631308	0.84819	0.732692	0.632692	0.848077	0.73561	0.643697	0.834687	0.475285	0.468549	0.263117	0.692831	6	chrX	combined
split_2	NK_cell_Dim	0.804348	0.869565	0.769231	0.826746	0.696805	0.891769	0.834615	0.707404	0.903846	0.829735	0.700897	0.896321	0.608696	0.664141	0.414654	0.803837	27	SLE	combined
split_2	Non_classical_monocyte	0.73913	0.9375	0.576923	0.75458	0.624569	0.824835	0.788462	0.673077	0.846154	0.816054	0.697476	0.866221	0.498182	0.610089	0.388881	0.703211	3	chrX	combined
split_2	Non_classical_monocyte	0.869565	0.954545	0.807692	0.935061	0.780962	0.935061	0.942308	0.790385	0.942308	0.949833	0.796577	0.949833	0.740602	0.877058	0.58066	0.877058	23	SLE	combined
split_2	Plasmablast	0.461538	0.666667	0.173913	0.414652	0.266272	0.511954	0.555707	0.427989	0.608696	0.62631	0.568721	0.676561	0.0421053	0.163921	-0.222277	0.294605	4	chrX	combined
split_2	Plasmablast	0.641026	0.909091	0.434783	0.639136	0.492308	0.74224	0.66712	0.589674	0.782609	0.699443	0.652179	0.821628	0.334146	0.337932	0.216901	0.589768	15	SLE	combined
split_2	Plasmacytoid_DC	0.543478	0.727273	0.307692	0.513193	0.387575	0.625699	0.578846	0.478846	0.675	0.615081	0.555407	0.699952	0.145133	0.183266	-0.0450505	0.402422	7	chrX	combined
split_2	Plasmacytoid_DC	0.826087	0.909091	0.769231	0.761441	0.733383	0.913373	0.759615	0.740385	0.917308	0.745819	0.740174	0.916388	0.654135	0.516752	0.488564	0.828268	21	SLE	combined
split_2	Progenitor_cell	0.625	0.583333	1	0.628909	0.415	0.664103	0.657895	0.526316	0.684211	0.617647	0.538462	0.636364	0.21875	0.441641	0.168345	0.4842	18	chrX	combined
split_2	Progenitor_cell	0.775	0.75	0.857143	0.690625	0.649912	0.874764	0.691729	0.648997	0.873434	0.646429	0.619264	0.831385	0.545455	0.408838	0.311129	0.756205	19	SLE	combined
split_2	B_cell_Atypical	0.6	0.666667	0.56	0.623344	0.485348	0.711969	0.625	0.49	0.72	0.631313	0.550707	0.710933	0.205882	0.248513	-0.0198811	0.44	14	chrX	combined
split_2	B_cell_Atypical	0.688889	1	0.44	0.721997	0.549569	0.772222	0.76	0.64	0.8	0.786667	0.68	0.822222	0.411215	0.570088	0.383886	0.632456	14	SLE	combined
split_2	B_cell_Memory	0.695652	0.772727	0.653846	0.783432	0.581664	0.805184	0.790385	0.582692	0.815385	0.783293	0.611237	0.803445	0.394737	0.576353	0.164595	0.627758	13	chrX	combined
split_2	B_cell_Memory	0.891304	0.956522	0.846154	0.891564	0.805184	0.956687	0.892308	0.826923	0.961538	0.879064	0.815426	0.966555	0.782609	0.78087	0.652691	0.916057	20	SLE	combined
split_2	B_cell_Naive	0.586957	0.652174	0.576923	0.625699	0.478261	0.718059	0.65	0.475	0.715385	0.664962	0.553442	0.709699	0.173913	0.308106	-0.0496198	0.42896	4	chrX	combined
split_2	B_cell_Naive	0.891304	0.956522	0.846154	0.935061	0.805184	0.956687	0.942308	0.821154	0.961538	0.949833	0.815426	0.966555	0.782609	0.877058	0.646675	0.916057	16	SLE	combined
split_2	B_cell	0.644444	0.68	0.68	0.592593	0.527622	0.75558	0.585	0.52475	0.755	0.602452	0.56825	0.735	0.28	0.176472	0.0498374	0.507972	7	chrX	combined
split_2	B_cell	0.555556	0.647059	0.44	0.640212	0.425877	0.667656	0.66	0.45	0.685	0.664314	0.535253	0.687619	0.134615	0.327968	-0.1	0.384085	18	SLE	combined
split_2	CD4_positive,_alpha_beta_T_cell	0.630435	0.628571	0.846154	0.610248	0.494274	0.713642	0.611538	0.498077	0.703846	0.626474	0.564274	0.693576	0.206897	0.291756	-0.0053082	0.468239	4	chrX	combined
split_2	CD4_positive,_alpha_beta_T_cell	0.804348	1	0.653846	0.801841	0.704949	0.891561	0.826923	0.75	0.903846	0.849498	0.782609	0.916388	0.621572	0.671512	0.550482	0.803837	19	SLE	combined
split_2	CD4_T_cell_Effector_Memory	0.673913	0.689655	0.769231	0.674693	0.556591	0.778295	0.671154	0.549904	0.767308	0.672375	0.59203	0.751792	0.324853	0.340674	0.0995227	0.556445	3	chrX	combined
split_2	CD4_T_cell_Effector_Memory	0.826087	1	0.692308	0.824769	0.7301	0.913373	0.846154	0.769231	0.923077	0.866221	0.799331	0.93311	0.661765	0.703211	0.580119	0.839719	14	SLE	combined
split_2	CD4_T_cell_Naive	0.565217	0.65	0.5	0.71377	0.442227	0.693347	0.738462	0.461538	0.694327	0.74818	0.547699	0.700897	0.144981	0.489809	-0.0781575	0.398957	5	chrX	combined
split_2	CD4_T_cell_Naive	0.76087	0.8	0.769231	0.674684	0.653499	0.84819	0.682692	0.659615	0.853846	0.686256	0.664944	0.834687	0.516252	0.363641	0.326923	0.701646	17	SLE	combined
split_2	CD4_T_cell_Treg	0.652174	0.666667	0.769231	0.567651	0.537421	0.757697	0.559615	0.526923	0.748077	0.596635	0.578941	0.7307	0.275591	0.131269	0.055301	0.520841	5	chrX	combined
split_2	CD4_T_cell_Treg	0.804348	0.757576	0.961538	0.736394	0.688465	0.888308	0.725	0.680769	0.875	0.702703	0.671427	0.83871	0.58517	0.562331	0.441588	0.793116	18	SLE	combined
split_2	CD8_positive,_alpha_beta_T_cell	0.695652	0.666667	0.923077	0.58587	0.560934	0.774671	0.578846	0.567308	0.761538	0.607564	0.600642	0.735786	0.342857	0.178025	0.17606	0.600925	7	chrX	combined
split_2	CD8_positive,_alpha_beta_T_cell	0.804348	0.774194	0.923077	0.780914	0.697216	0.889862	0.773077	0.686538	0.880769	0.751792	0.676445	0.850652	0.590099	0.554755	0.418928	0.782476	21	SLE	combined
split_2	CD8_T_cell_Cytotoxic_GZMH_	0.673913	0.73913	0.653846	0.652174	0.565053	0.783437	0.663462	0.563462	0.790481	0.671823	0.599836	0.783293	0.347826	0.326923	0.12638	0.57715	4	chrX	combined
split_2	CD8_T_cell_Cytotoxic_GZMH_	0.804348	0.869565	0.769231	0.783437	0.713763	0.891769	0.784615	0.709615	0.903846	0.77146	0.707559	0.896321	0.608696	0.564902	0.422081	0.803837	25	SLE	combined
split_2	CD8_T_cell_Cytotoxic_GZMK_	0.717391	0.809524	0.653846	0.718059	0.587933	0.805184	0.726923	0.601923	0.821154	0.724956	0.624714	0.813346	0.441121	0.45168	0.203846	0.64618	2	chrX	combined
split_2	CD8_T_cell_Cytotoxic_GZMK_	0.76087	0.857143	0.692308	0.826087	0.653499	0.848476	0.823077	0.669231	0.865385	0.802933	0.67893	0.866221	0.527103	0.646154	0.343792	0.735738	22	SLE	combined
split_2	CD8_T_cell_MAIT	0.75	0.842105	0.666667	0.634105	0.651063	0.841157	0.645833	0.6625	0.854167	0.641204	0.655574	0.848485	0.506122	0.295382	0.329622	0.724356	6	chrX	combined
split_2	CD8_T_cell_MAIT	0.75	0.842105	0.666667	0.840493	0.636364	0.841157	0.8375	0.65	0.85	0.803182	0.645586	0.84689	0.506122	0.678543	0.31053	0.703675	23	SLE	combined
split_2	CD8_T_cell_Naive	0.543478	0.857143	0.230769	0.485563	0.36599	0.595794	0.590385	0.507692	0.673077	0.632585	0.569231	0.715719	0.162912	0.249485	0.0245026	0.432562	1	chrX	combined
split_2	CD8_T_cell_Naive	0.76087	0.758621	0.846154	0.798954	0.649462	0.84819	0.786538	0.640385	0.848077	0.758118	0.647977	0.818779	0.504892	0.606022	0.285191	0.699569	12	SLE	combined
split_2	Classical_monocyte	0.717391	0.882353	0.576923	0.625699	0.600938	0.824769	0.65	0.638462	0.840385	0.664962	0.658505	0.849498	0.453382	0.308106	0.294203	0.680769	3	chrX	combined
split_2	Classical_monocyte	0.869565	0.857143	0.923077	0.769928	0.782609	0.956183	0.755769	0.775	0.95	0.728753	0.750177	0.929632	0.731518	0.577497	0.577497	0.911538	29	SLE	combined
split_2	Conventional_DC	0.478261	1	0.0769231	0.309426	0.263505	0.467432	0.519231	0.5	0.596154	0.58194	0.565217	0.648829	0.0675676	0.130744	0	0.306282	10	chrX	combined
split_2	Conventional_DC	0.869565	0.954545	0.807692	0.891769	0.782609	0.936134	0.898077	0.801635	0.942981	0.896321	0.799331	0.949833	0.740602	0.789352	0.610089	0.878782	17	SLE	combined
split_2	Lymphocyte	0.652174	0.638889	0.884615	0.622253	0.50928	0.729606	0.617308	0.522981	0.717308	0.630388	0.576788	0.701035	0.24898	0.281973	0.0598927	0.512893	22	chrX	combined
split_2	Lymphocyte	0.76087	0.826087	0.730769	0.760078	0.653499	0.848476	0.776923	0.669231	0.859615	0.780672	0.672375	0.847762	0.521739	0.557612	0.340674	0.715798	33	SLE	combined
split_2	natural_killer_cell	0.543478	0.647059	0.423077	0.518116	0.415217	0.65224	0.536538	0.442308	0.675	0.584634	0.541291	0.686386	0.117002	0.0742278	-0.115385	0.364292	21	chrX	combined
split_2	natural_killer_cell	0.782609	0.863636	0.730769	0.696805	0.674684	0.870062	0.701923	0.682692	0.884615	0.700897	0.686256	0.879675	0.567669	0.400775	0.364259	0.769231	39	SLE	combined
split_2	NK_cell_Bright	0.608696	0.625	0.769231	0.480598	0.467909	0.704183	0.484615	0.471154	0.692308	0.557785	0.551535	0.681989	0.175299	-0.03698	-0.0640527	0.422081	8	chrX	combined
split_2	NK_cell_Bright	0.76087	0.857143	0.692308	0.782609	0.649539	0.848476	0.778846	0.669231	0.859615	0.761063	0.67893	0.866221	0.527103	0.557692	0.343792	0.715798	24	SLE	combined
split_2	NK_cell_Dim	0.804348	0.793103	0.884615	0.888308	0.697195	0.890936	0.875	0.690192	0.886538	0.83871	0.681673	0.863991	0.594912	0.793116	0.418145	0.782114	6	chrX	combined
split_2	NK_cell_Dim	0.717391	1	0.5	0.75458	0.565835	0.801841	0.788462	0.653846	0.826923	0.816054	0.698997	0.849498	0.465116	0.610089	0.402422	0.671512	27	SLE	combined
split_2	Non_classical_monocyte	0.695652	1	0.461538	0.595794	0.565835	0.778468	0.673077	0.653846	0.807692	0.715719	0.698997	0.832776	0.427046	0.432562	0.402422	0.640513	3	chrX	combined
split_2	Non_classical_monocyte	0.847826	0.88	0.846154	0.869565	0.76006	0.934939	0.867308	0.753846	0.936538	0.847762	0.740347	0.929632	0.692161	0.734615	0.511144	0.868909	23	SLE	combined
split_2	Plasmablast	0.461538	0.625	0.217391	0.477004	0.288949	0.541207	0.517663	0.411685	0.620924	0.598662	0.563306	0.676561	0.0261593	0.0368605	-0.222277	0.294605	4	chrX	combined
split_2	Plasmablast	0.615385	0.7	0.608696	0.565864	0.48448	0.74359	0.554348	0.479484	0.735054	0.618121	0.580133	0.748606	0.227213	0.10782	-0.040517	0.470109	15	SLE	combined
split_2	Plasmacytoid_DC	0.586957	0.733333	0.423077	0.587338	0.451882	0.69003	0.642308	0.503846	0.713462	0.668339	0.567129	0.730383	0.209765	0.321314	0.00828742	0.453089	7	chrX	combined
split_2	Plasmacytoid_DC	0.73913	0.769231	0.769231	0.76006	0.631204	0.84819	0.753846	0.626923	0.848077	0.736901	0.640191	0.831572	0.469231	0.511144	0.252634	0.692831	21	SLE	combined
split_2	Progenitor_cell	0.55	0.542857	0.904762	0.415	0.358333	0.587526	0.526316	0.43609	0.610276	0.538462	0.495622	0.587202	0.0649351	0.168345	-0.174576	0.350438	18	chrX	combined
split_2	Progenitor_cell	0.625	0.6875	0.52381	0.55	0.484655	0.742327	0.548872	0.501253	0.749499	0.551531	0.525627	0.714796	0.257426	0.0977444	0.00250627	0.503759	19	SLE	combined
split_2	B_cell_Atypical	0.622222	0.785714	0.44	0.615453	0.479424	0.726841	0.64	0.54	0.75	0.648889	0.578182	0.751634	0.274882	0.290659	0.0924995	0.51245	14	chrX	combined
split_2	B_cell_Atypical	0.822222	0.904762	0.76	0.844906	0.711111	0.911376	0.85	0.725	0.915	0.838384	0.722222	0.911111	0.647059	0.695837	0.456435	0.825064	14	SLE	combined
split_2	B_cell_Memory	0.804348	0.757576	0.961538	0.843631	0.688465	0.888308	0.830769	0.680769	0.875	0.797173	0.671427	0.83871	0.58517	0.699569	0.43358	0.793116	13	chrX	combined
split_2	B_cell_Memory	0.869565	0.954545	0.807692	0.913373	0.782609	0.935061	0.923077	0.801923	0.942308	0.93311	0.799331	0.949833	0.740602	0.839719	0.613356	0.877058	20	SLE	combined
split_2	B_cell_Naive	0.608696	0.7	0.538462	0.625699	0.480237	0.718067	0.65	0.498077	0.732692	0.664962	0.564277	0.73561	0.230483	0.308106	-0.0040032	0.468549	4	chrX	combined
split_2	B_cell_Naive	0.847826	0.88	0.846154	0.870059	0.76006	0.934939	0.878846	0.753846	0.936538	0.879675	0.740174	0.929806	0.692161	0.75193	0.511144	0.868909	16	SLE	combined
split_2	B_cell	0.733333	0.842105	0.64	0.660694	0.619398	0.822751	0.685	0.635	0.84	0.689167	0.642222	0.84	0.475728	0.384085	0.273861	0.695837	7	chrX	combined
split_2	B_cell	0.8	1	0.64	0.820106	0.69579	0.888889	0.84	0.74	0.9	0.857778	0.768889	0.911111	0.61244	0.696932	0.53936	0.8	18	SLE	combined
split_2	CD4_positive,_alpha_beta_T_cell	0.717391	0.882353	0.576923	0.629212	0.595151	0.806161	0.644231	0.642308	0.826923	0.657631	0.658505	0.846405	0.453382	0.290423	0.305678	0.671512	4	chrX	combined
split_2	CD4_positive,_alpha_beta_T_cell	0.826087	0.8	0.923077	0.778295	0.729606	0.912365	0.767308	0.717308	0.905769	0.743423	0.701035	0.880256	0.637795	0.556445	0.468239	0.824319	19	SLE	combined
split_2	CD4_T_cell_Effector_Memory	0.652174	0.625	0.961538	0.485192	0.471441	0.707686	0.530769	0.517308	0.7	0.580773	0.573871	0.684211	0.230126	0.123553	0.0509525	0.494608	3	chrX	combined
split_2	CD4_T_cell_Effector_Memory	0.847826	1	0.730769	0.7301	0.75458	0.935061	0.769231	0.788462	0.942308	0.799331	0.816054	0.949833	0.702403	0.580119	0.610089	0.877058	14	SLE	combined
split_2	CD4_T_cell_Naive	0.630435	0.764706	0.5	0.718598	0.501182	0.737154	0.721154	0.536538	0.752212	0.715719	0.584634	0.763482	0.285192	0.438529	0.0742278	0.523501	5	chrX	combined
split_2	CD4_T_cell_Naive	0.804348	0.757576	0.961538	0.815942	0.697216	0.888308	0.8	0.686538	0.875	0.764706	0.676445	0.83871	0.58517	0.677365	0.441188	0.782114	17	SLE	combined
split_2	CD4_T_cell_Treg	0.565217	0.75	0.346154	0.550167	0.416711	0.659557	0.592308	0.496154	0.694231	0.622551	0.563359	0.715942	0.181495	0.198898	-0.0096125	0.422995	5	chrX	combined
split_2	CD4_T_cell_Treg	0.847826	0.913043	0.807692	0.848476	0.760078	0.934939	0.853846	0.765096	0.936538	0.846154	0.755853	0.93311	0.695652	0.701646	0.526098	0.868909	18	SLE	combined
split_2	CD8_positive,_alpha_beta_T_cell	0.826087	0.846154	0.846154	0.84819	0.739029	0.913375	0.848077	0.734327	0.917308	0.831572	0.721254	0.912053	0.646154	0.692831	0.469014	0.828268	7	chrX	combined
split_2	CD8_positive,_alpha_beta_T_cell	0.869565	1	0.769231	0.824769	0.778468	0.935061	0.846154	0.807692	0.942308	0.866221	0.832776	0.949833	0.743494	0.703211	0.640513	0.877058	21	SLE	combined
split_2	CD8_T_cell_Cytotoxic_GZMH_	0.695652	0.6875	0.846154	0.704183	0.567651	0.795203	0.692308	0.559615	0.780769	0.681768	0.596635	0.751792	0.358566	0.423448	0.131269	0.601119	4	chrX	combined
split_2	CD8_T_cell_Cytotoxic_GZMH_	0.869565	1	0.769231	0.824769	0.778468	0.935061	0.846154	0.807692	0.942308	0.866221	0.832776	0.949833	0.743494	0.703211	0.640513	0.877058	25	SLE	combined
split_2	CD8_T_cell_Cytotoxic_GZMK_	0.652174	0.647059	0.846154	0.658672	0.512811	0.743798	0.648077	0.515385	0.730769	0.651059	0.57292	0.708552	0.258065	0.326055	0.0338758	0.512475	2	chrX	combined
split_2	CD8_T_cell_Cytotoxic_GZMK_	0.934783	0.96	0.923077	1	0.869565	0.978313	1	0.873077	0.980769	1	0.850652	0.983278	0.868069	1	0.74048	0.956949	22	SLE	combined
split_2	CD8_T_cell_MAIT	0.772727	0.9375	0.625	0.817053	0.665501	0.863636	0.829167	0.695833	0.875	0.828072	0.696626	0.88456	0.556452	0.66672	0.421324	0.759555	6	chrX	combined
split_2	CD8_T_cell_MAIT	0.954545	1	0.916667	1	0.909091	1	1	0.916667	1	1	0.924242	1	0.909091	1	0.833333	1	23	SLE	combined
split_2	CD8_T_cell_Naive	0.543478	0.857143	0.230769	0.467432	0.36599	0.595794	0.596154	0.513462	0.667308	0.648829	0.573021	0.698997	0.162912	0.306282	0.03698	0.402422	1	chrX	combined
split_2	CD8_T_cell_Naive	0.804348	0.904762	0.730769	0.8037	0.716456	0.891769	0.821154	0.732404	0.903846	0.829783	0.732023	0.899666	0.613084	0.646675	0.468549	0.803837	12	SLE	combined
split_2	Classical_monocyte	0.73913	0.85	0.653846	0.824769	0.629212	0.848186	0.846154	0.644231	0.848365	0.866221	0.658505	0.849498	0.486989	0.703211	0.294203	0.701646	3	chrX	combined
split_2	Classical_monocyte	0.869565	0.916667	0.846154	0.757697	0.783432	0.935061	0.748077	0.790385	0.942308	0.728866	0.780672	0.949833	0.737643	0.509559	0.576353	0.877058	29	SLE	combined
split_2	Conventional_DC	0.673913	0.657143	0.884615	0.79038	0.527817	0.763908	0.775	0.534327	0.75	0.742857	0.58277	0.722222	0.300203	0.639196	0.0777165	0.556445	10	chrX	combined
split_2	Conventional_DC	0.847826	0.913043	0.807692	0.826087	0.760078	0.934939	0.823077	0.765385	0.936538	0.802933	0.761063	0.93311	0.695652	0.646154	0.539719	0.868909	17	SLE	combined
split_2	Lymphocyte	0.73913	0.769231	0.769231	0.761441	0.632013	0.847311	0.759615	0.632692	0.842308	0.745819	0.643255	0.829735	0.469231	0.516752	0.263117	0.691262	22	chrX	combined
split_2	Lymphocyte	0.804348	1	0.653846	0.679041	0.704949	0.891561	0.730769	0.75	0.903846	0.765886	0.782609	0.916388	0.621572	0.52105	0.550482	0.803837	33	SLE	combined
split_2	natural_killer_cell	0.76087	0.777778	0.807692	0.803685	0.652174	0.84819	0.798077	0.646154	0.848077	0.776415	0.653203	0.831572	0.510638	0.600207	0.292308	0.699569	21	chrX	combined
split_2	natural_killer_cell	0.804348	0.947368	0.692308	0.709958	0.704949	0.891561	0.744231	0.732692	0.903846	0.763434	0.746894	0.916388	0.617375	0.516542	0.484814	0.803837	39	SLE	combined
split_2	NK_cell_Bright	0.826087	0.846154	0.846154	0.84819	0.718067	0.913043	0.848077	0.717308	0.911538	0.831572	0.707559	0.896321	0.646154	0.692831	0.45168	0.823077	8	chrX	combined
split_2	NK_cell_Bright	0.804348	1	0.653846	0.801841	0.704949	0.891561	0.826923	0.75	0.903846	0.849498	0.782609	0.916388	0.621572	0.671512	0.550482	0.803837	24	SLE	combined
split_2	NK_cell_Dim	0.73913	0.75	0.807692	0.740124	0.629183	0.84374	0.740385	0.621154	0.834712	0.7307	0.635452	0.807404	0.463035	0.477113	0.243955	0.68927	6	chrX	combined
split_2	NK_cell_Dim	0.869565	1	0.769231	0.978313	0.778468	0.935061	0.980769	0.807692	0.942308	0.983278	0.832776	0.949833	0.743494	0.956949	0.640513	0.877058	27	SLE	combined
split_2	Non_classical_monocyte	0.73913	0.9375	0.576923	0.679041	0.620714	0.826087	0.730769	0.667308	0.846154	0.765886	0.688859	0.866221	0.498182	0.52105	0.371574	0.703211	3	chrX	combined
split_2	Non_classical_monocyte	0.869565	0.884615	0.884615	0.804816	0.782609	0.935061	0.803846	0.778846	0.942308	0.787157	0.761063	0.93311	0.734615	0.604792	0.557692	0.877058	23	SLE	combined
split_2	Plasmablast	0.615385	0.7	0.608696	0.593	0.490607	0.745304	0.595109	0.491712	0.744565	0.643138	0.585779	0.75655	0.227213	0.18719	-0.0167299	0.483696	4	chrX	combined
split_2	Plasmablast	0.74359	0.882353	0.652174	0.770752	0.616861	0.847375	0.785326	0.648098	0.869565	0.797845	0.683469	0.875139	0.498715	0.563053	0.298144	0.733178	15	SLE	combined
split_2	Plasmacytoid_DC	0.695652	0.7	0.807692	0.737096	0.575569	0.801752	0.728846	0.565385	0.792308	0.714465	0.600065	0.77146	0.366142	0.464901	0.138287	0.604853	7	chrX	combined
split_2	Plasmacytoid_DC	0.847826	0.88	0.846154	0.826087	0.761367	0.934562	0.823077	0.759615	0.930769	0.802933	0.743423	0.929632	0.692161	0.646154	0.516752	0.867396	21	SLE	combined
split_2	Progenitor_cell	0.725	0.678571	0.904762	0.769923	0.587526	0.821051	0.76817	0.610276	0.818296	0.711172	0.587202	0.757601	0.438776	0.561535	0.246655	0.666495	18	chrX	combined
split_2	Progenitor_cell	0.7	0.764706	0.619048	0.8	0.575266	0.82335	0.802005	0.582707	0.823434	0.766604	0.57551	0.797222	0.404467	0.60401	0.173184	0.650814	19	SLE	combined
split_2	B_cell_Atypical	0.511111	0.615385	0.32	0.36818	0.353247	0.609687	0.425	0.41475	0.645	0.527778	0.527778	0.657076	0.0660377	-0.16855	-0.20967	0.311877	14	chrX	combined
split_2	B_cell_Atypical	0.733333	0.76	0.76	0.770075	0.621083	0.844754	0.76	0.615	0.845	0.727025	0.622453	0.823889	0.46	0.55814	0.231393	0.687256	14	SLE	combined
split_2	B_cell_Memory	0.717391	0.69697	0.884615	0.723913	0.58587	0.803685	0.711538	0.578846	0.798077	0.695062	0.607564	0.766809	0.400802	0.477629	0.178025	0.639196	13	chrX	combined
split_2	B_cell_Memory	0.869565	1	0.769231	0.847322	0.778468	0.935061	0.865385	0.807692	0.942308	0.882943	0.832776	0.949833	0.743494	0.735738	0.640513	0.877058	20	SLE	combined
split_2	B_cell_Naive	0.652174	0.638889	0.884615	0.539855	0.50928	0.743798	0.534615	0.515192	0.730769	0.582923	0.572821	0.708552	0.24898	0.0781575	0.0338758	0.523148	4	chrX	combined
split_2	B_cell_Naive	0.891304	0.956522	0.846154	0.847322	0.824769	0.956687	0.865385	0.828846	0.961538	0.882943	0.815426	0.966555	0.782609	0.735738	0.652691	0.916057	16	SLE	combined
split_2	B_cell	0.733333	0.842105	0.64	0.711111	0.621399	0.843999	0.72	0.64	0.85	0.712	0.645217	0.855333	0.475728	0.44	0.288276	0.696932	7	chrX	combined
split_2	B_cell	0.822222	0.84	0.84	0.820963	0.728395	0.911287	0.815	0.72	0.915	0.783704	0.703064	0.893333	0.64	0.63901	0.456435	0.825064	18	SLE	combined
split_2	CD4_positive,_alpha_beta_T_cell	0.73913	0.85	0.653846	0.761891	0.629212	0.848186	0.765385	0.65	0.853846	0.755853	0.664944	0.862598	0.486989	0.526235	0.308106	0.703211	4	chrX	combined
split_2	CD4_positive,_alpha_beta_T_cell	0.826087	0.95	0.730769	0.826087	0.7301	0.913373	0.840385	0.757692	0.917308	0.846405	0.7644	0.916388	0.657993	0.680769	0.523501	0.828268	19	SLE	combined
split_2	CD4_T_cell_Effector_Memory	0.695652	0.75	0.692308	0.610186	0.581476	0.80481	0.607692	0.576923	0.803846	0.627648	0.607333	0.791866	0.387833	0.213747	0.154892	0.604792	3	chrX	combined
split_2	CD4_T_cell_Effector_Memory	0.891304	1	0.807692	0.847322	0.824769	0.956687	0.865385	0.846154	0.961538	0.882943	0.866221	0.966555	0.785047	0.735738	0.703211	0.916057	14	SLE	combined
split_2	CD4_T_cell_Naive	0.73913	1	0.538462	0.704949	0.624569	0.824769	0.75	0.692308	0.846154	0.782609	0.732441	0.866221	0.503597	0.550482	0.46225	0.703211	5	chrX	combined
split_2	CD4_T_cell_Naive	0.804348	0.869565	0.769231	0.8037	0.696805	0.891769	0.821154	0.707692	0.898077	0.829783	0.707559	0.896321	0.608696	0.646675	0.415385	0.789352	17	SLE	combined
split_2	CD4_T_cell_Treg	0.673913	0.666667	0.846154	0.672809	0.54468	0.76006	0.665385	0.546154	0.75	0.666419	0.589298	0.728866	0.308617	0.333018	0.105011	0.554755	5	chrX	combined
split_2	CD4_T_cell_Treg	0.847826	0.88	0.846154	0.870059	0.761441	0.934562	0.878846	0.765385	0.930769	0.879675	0.751421	0.916997	0.692161	0.75193	0.526235	0.867396	18	SLE	combined
split_2	CD8_positive,_alpha_beta_T_cell	0.804348	0.869565	0.769231	0.870059	0.696812	0.892798	0.878846	0.713269	0.903942	0.879675	0.709592	0.896321	0.608696	0.75193	0.428381	0.804799	7	chrX	combined
split_2	CD8_positive,_alpha_beta_T_cell	0.869565	0.833333	0.961538	0.845807	0.780914	0.934562	0.836538	0.773077	0.930769	0.807404	0.743394	0.912053	0.728346	0.691262	0.600411	0.872966	21	SLE	combined
split_2	CD8_T_cell_Cytotoxic_GZMH_	0.652174	0.666667	0.769231	0.658672	0.527817	0.757697	0.648077	0.521154	0.748077	0.651059	0.575898	0.728866	0.275591	0.326055	0.0447399	0.512475	4	chrX	combined
split_2	CD8_T_cell_Cytotoxic_GZMH_	0.847826	0.952381	0.769231	0.826087	0.760078	0.935061	0.840385	0.782692	0.942308	0.846405	0.796577	0.946295	0.699065	0.680769	0.58066	0.877058	25	SLE	combined
split_2	CD8_T_cell_Cytotoxic_GZMK_	0.717391	0.809524	0.653846	0.672834	0.605731	0.824835	0.688462	0.619231	0.828846	0.694596	0.636343	0.829735	0.441121	0.379486	0.238462	0.652691	2	chrX	combined
split_2	CD8_T_cell_Cytotoxic_GZMK_	0.847826	0.952381	0.769231	0.826746	0.760078	0.934939	0.834615	0.782692	0.936538	0.829735	0.783293	0.93311	0.699065	0.664141	0.576353	0.868909	22	SLE	combined
split_2	CD8_T_cell_MAIT	0.727273	0.833333	0.625	0.703782	0.609426	0.818558	0.7125	0.625	0.829167	0.697967	0.625668	0.828072	0.463415	0.427231	0.255655	0.66672	6	chrX	combined
split_2	CD8_T_cell_MAIT	0.863636	0.846154	0.916667	0.839139	0.771292	0.954258	0.833333	0.766667	0.95	0.792368	0.731935	0.923077	0.722689	0.681747	0.543427	0.908333	23	SLE	combined
split_2	CD8_T_cell_Naive	0.652174	0.75	0.576923	0.556936	0.523542	0.761435	0.586538	0.544231	0.771154	0.616952	0.588629	0.767527	0.315985	0.180144	0.0880705	0.540155	1	chrX	combined
split_2	CD8_T_cell_Naive	0.782609	0.9	0.692308	0.73913	0.684813	0.870062	0.751923	0.701923	0.884615	0.751421	0.709699	0.896321	0.572491	0.503846	0.415385	0.769231	12	SLE	combined
split_2	Classical_monocyte	0.73913	0.818182	0.692308	0.632013	0.629212	0.84819	0.632692	0.638462	0.853846	0.645485	0.65106	0.846154	0.481203	0.263117	0.275601	0.701646	3	chrX	combined
split_2	Classical_monocyte	0.891304	0.92	0.884615	0.869565	0.826087	0.956687	0.867308	0.823077	0.961538	0.847762	0.802933	0.962963	0.780115	0.734615	0.648519	0.916057	29	SLE	combined
split_2	Conventional_DC	0.608696	0.633333	0.730769	0.530892	0.479179	0.716434	0.521154	0.474808	0.709615	0.575898	0.553347	0.700235	0.185039	0.0447399	-0.0502157	0.423711	10	chrX	combined
split_2	Conventional_DC	0.891304	1	0.807692	0.913373	0.801841	0.956687	0.923077	0.826923	0.961538	0.93311	0.849498	0.966555	0.785047	0.839719	0.671512	0.916057	17	SLE	combined
split_2	Lymphocyte	0.652174	0.727273	0.615385	0.605731	0.537628	0.762927	0.625	0.538462	0.778846	0.64372	0.585284	0.77146	0.308271	0.253937	0.0765559	0.557692	22	chrX	combined
split_2	Lymphocyte	0.804348	0.947368	0.692308	0.826087	0.709958	0.891574	0.823077	0.738462	0.903846	0.802933	0.74818	0.916388	0.617375	0.646154	0.489809	0.803837	33	SLE	combined
split_2	natural_killer_cell	0.73913	0.75	0.807692	0.600932	0.625531	0.845807	0.590385	0.615385	0.836538	0.614994	0.630954	0.807404	0.463035	0.188151	0.237004	0.68927	21	chrX	combined
split_2	natural_killer_cell	0.826087	0.846154	0.846154	0.913375	0.729055	0.913043	0.917308	0.723077	0.911538	0.912974	0.707559	0.896321	0.646154	0.828268	0.464372	0.824319	39	SLE	combined
split_2	NK_cell_Bright	0.73913	0.733333	0.846154	0.664923	0.620246	0.843631	0.653846	0.611442	0.830769	0.655842	0.626713	0.802933	0.456693	0.325381	0.236746	0.691262	8	chrX	combined
split_2	NK_cell_Bright	0.826087	0.95	0.730769	0.870059	0.734161	0.913373	0.878846	0.757692	0.923077	0.879675	0.7644	0.93311	0.657993	0.75193	0.523501	0.839719	24	SLE	combined
split_2	NK_cell_Dim	0.76087	0.8	0.769231	0.803685	0.653499	0.849292	0.798077	0.653846	0.859615	0.776415	0.658793	0.846405	0.516252	0.600207	0.312986	0.716731	6	chrX	combined
split_2	NK_cell_Dim	0.76087	1	0.576923	0.778468	0.652281	0.847322	0.807692	0.711538	0.865385	0.832776	0.749164	0.882943	0.542495	0.640513	0.491689	0.735738	27	SLE	combined
split_2	Non_classical_monocyte	0.782609	0.833333	0.769231	0.782609	0.675306	0.890936	0.778846	0.684615	0.886538	0.761063	0.679885	0.879675	0.562738	0.557692	0.375046	0.778333	3	chrX	combined
split_2	Non_classical_monocyte	0.891304	0.956522	0.846154	0.913373	0.805184	0.956687	0.923077	0.821154	0.961538	0.93311	0.815426	0.966555	0.782609	0.839719	0.646675	0.916057	23	SLE	combined
split_2	Plasmablast	0.564103	0.6875	0.478261	0.512821	0.438124	0.693522	0.529891	0.45788	0.710598	0.605072	0.570736	0.732048	0.155414	0.0597826	-0.0828984	0.417803	4	chrX	combined
split_2	Plasmablast	0.666667	0.692308	0.782609	0.705659	0.523956	0.788425	0.684783	0.510666	0.769022	0.698041	0.594993	0.761427	0.290909	0.403961	0.0211942	0.57121	15	SLE	combined
split_2	Plasmacytoid_DC	0.695652	0.666667	0.923077	0.56153	0.560934	0.769928	0.567308	0.567308	0.755769	0.600642	0.600642	0.728753	0.342857	0.17606	0.175655	0.600411	7	chrX	combined
split_2	Plasmacytoid_DC	0.804348	0.947368	0.692308	0.780962	0.709958	0.891561	0.801923	0.738462	0.903846	0.813174	0.74818	0.912974	0.617375	0.613356	0.489809	0.803837	21	SLE	combined
split_2	Progenitor_cell	0.475	0	0	0.305932	0.305932	0.305932	0.5	0.5	0.5	0.525	0.525	0.525	0	0	0	0	18	chrX	combined
split_2	Progenitor_cell	0.775	0.730769	0.904762	0.713594	0.644629	0.872179	0.715539	0.660401	0.868421	0.663946	0.620238	0.809694	0.543147	0.469756	0.351615	0.756205	19	SLE	combined
split_3	B_cell_Atypical	0.697674	0.75	0.652174	0.536356	0.580489	0.813551	0.573913	0.58587	0.816304	0.580721	0.585333	0.787452	0.398278	0.164384	0.172491	0.631238	7	chrX	boruta
split_3	B_cell_Atypical	0.906977	0.913043	0.913043	0.930308	0.835593	0.976693	0.931522	0.831522	0.975	0.918053	0.787087	0.959555	0.813043	0.861173	0.674622	0.954158	13	SLE	boruta
split_3	B_cell_Memory	0.688889	0.72	0.72	0.645503	0.576504	0.800398	0.645	0.57	0.8	0.645217	0.593846	0.777778	0.37	0.288276	0.148976	0.597614	5	chrX	boruta
split_3	B_cell_Memory	0.8	0.9	0.72	0.821695	0.705934	0.889219	0.835	0.72	0.895	0.837661	0.712	0.893333	0.604878	0.674057	0.442583	0.785302	17	SLE	boruta
split_3	B_cell_Naive	0.622222	0.633333	0.76	0.72409	0.489907	0.728395	0.715	0.49	0.72	0.691183	0.550681	0.697165	0.215385	0.461539	-0.0214669	0.461539	4	chrX	boruta
split_3	B_cell_Naive	0.822222	0.947368	0.72	0.778439	0.721453	0.911287	0.78	0.73975	0.92	0.761159	0.749524	0.928889	0.650485	0.55667	0.504473	0.83666	22	SLE	boruta
split_3	B_cell	0.688889	0.823529	0.56	0.574853	0.563767	0.798615	0.59	0.595	0.815	0.608889	0.613607	0.82	0.394231	0.182574	0.197233	0.63901	7	chrX	boruta
split_3	B_cell	0.822222	0.84	0.84	0.843975	0.731444	0.910481	0.84	0.725	0.905	0.811282	0.703704	0.890707	0.64	0.684117	0.456435	0.82	10	SLE	boruta
split_3	CD4_positive,_alpha_beta_T_cell	0.826087	0.95	0.730769	0.782609	0.737154	0.913373	0.796154	0.763173	0.923077	0.79699	0.767174	0.93311	0.657993	0.592308	0.539045	0.839719	2	chrX	boruta
split_3	CD4_positive,_alpha_beta_T_cell	0.826087	0.909091	0.769231	0.869565	0.73913	0.913375	0.884615	0.746154	0.917308	0.899666	0.740347	0.916388	0.654135	0.769231	0.489747	0.828268	10	SLE	boruta
split_3	CD4_T_cell_Effector_Memory	0.608696	0.833333	0.384615	0.614165	0.453133	0.69003	0.661538	0.540385	0.730769	0.684075	0.588629	0.763434	0.263345	0.355696	0.100931	0.516542	3	chrX	boruta
split_3	CD4_T_cell_Effector_Memory	0.913043	1	0.846154	0.913373	0.847322	0.978313	0.923077	0.865385	0.980769	0.93311	0.882943	0.983278	0.827068	0.839719	0.735738	0.956949	12	SLE	boruta
split_3	CD4_T_cell_Naive	0.73913	0.705882	0.923077	0.749693	0.620246	0.819737	0.736538	0.617019	0.805769	0.714807	0.630205	0.772941	0.443548	0.520841	0.277893	0.677365	4	chrX	boruta
split_3	CD4_T_cell_Naive	0.804348	0.869565	0.769231	0.783437	0.716434	0.891769	0.784615	0.715288	0.898077	0.77146	0.707559	0.896321	0.608696	0.564902	0.428713	0.789352	14	SLE	boruta
split_3	CD4_T_cell_Treg	0.630435	0.68	0.653846	0.545428	0.511897	0.740124	0.544231	0.501923	0.748269	0.588629	0.566165	0.740347	0.25239	0.0877058	0.0040032	0.504132	5	chrX	boruta
split_3	CD4_T_cell_Treg	0.826087	1	0.692308	0.891561	0.7301	0.913373	0.903846	0.769231	0.923077	0.916388	0.799331	0.93311	0.661765	0.803837	0.580119	0.839719	18	SLE	boruta
split_3	CD8_positive,_alpha_beta_T_cell	0.847826	0.827586	0.923077	0.934562	0.757697	0.913375	0.930769	0.748077	0.917308	0.912053	0.728753	0.896552	0.684932	0.867396	0.512475	0.832666	6	chrX	boruta
split_3	CD8_positive,_alpha_beta_T_cell	0.73913	0.791667	0.730769	0.653499	0.631308	0.826749	0.651923	0.626923	0.834615	0.658793	0.64372	0.829735	0.475285	0.301536	0.253937	0.664141	13	SLE	boruta
split_3	CD8_T_cell_Cytotoxic_GZMH_	0.652174	0.65625	0.807692	0.567651	0.522141	0.749693	0.559615	0.521154	0.736538	0.596635	0.575898	0.714807	0.266932	0.131269	0.0447399	0.512475	5	chrX	boruta
split_3	CD8_T_cell_Cytotoxic_GZMH_	0.913043	0.958333	0.884615	0.913043	0.848143	0.978313	0.911538	0.853846	0.980769	0.895549	0.846154	0.983278	0.825095	0.823077	0.701646	0.956949	23	SLE	boruta
split_3	CD8_T_cell_Cytotoxic_GZMK_	0.565217	0.625	0.576923	0.541932	0.454723	0.675306	0.532692	0.45	0.677019	0.582064	0.542609	0.679673	0.125475	0.0658292	-0.0995227	0.363641	2	chrX	boruta
split_3	CD8_T_cell_Cytotoxic_GZMK_	0.847826	0.88	0.846154	0.780962	0.76006	0.934562	0.801923	0.753846	0.930769	0.813174	0.740347	0.929632	0.692161	0.613356	0.511144	0.868909	19	SLE	boruta
split_3	CD8_T_cell_MAIT	0.704545	0.72	0.75	0.549862	0.590909	0.817034	0.55	0.5875	0.812708	0.571848	0.59517	0.785354	0.401674	0.109136	0.175	0.633333	8	chrX	boruta
split_3	CD8_T_cell_MAIT	0.818182	0.9	0.75	0.771316	0.705005	0.909279	0.783333	0.725	0.916667	0.774411	0.707665	0.922266	0.639344	0.573886	0.456435	0.833333	15	SLE	boruta
split_3	CD8_T_cell_Naive	0.5	0.6	0.346154	0.387203	0.358081	0.606057	0.440385	0.411442	0.636538	0.541291	0.533533	0.658505	0.0433996	-0.131269	-0.188151	0.294203	3	chrX	boruta
split_3	CD8_T_cell_Naive	0.847826	0.851852	0.884615	0.845807	0.76006	0.933917	0.836538	0.753846	0.925	0.807404	0.735532	0.912053	0.688588	0.691262	0.511144	0.867396	11	SLE	boruta
split_3	Classical_monocyte	0.826087	1	0.692308	0.913373	0.7301	0.913373	0.923077	0.769231	0.923077	0.93311	0.799331	0.93311	0.661765	0.839719	0.580119	0.839719	2	chrX	boruta
split_3	Classical_monocyte	0.978261	1	0.961538	1	0.935061	1	1	0.942308	1	1	0.949833	1	0.956023	1	0.877058	1	23	SLE	boruta
split_3	Conventional_DC	0.608696	0.681818	0.576923	0.518116	0.49271	0.718067	0.536538	0.494135	0.726923	0.584634	0.562363	0.722291	0.221805	0.0742278	-0.0116906	0.456766	2	chrX	boruta
split_3	Conventional_DC	0.913043	0.866667	1	0.911318	0.840714	0.978187	0.9	0.825	0.975	0.866667	0.787879	0.962963	0.818898	0.832666	0.715626	0.95646	15	SLE	boruta
split_3	Lymphocyte	0.695652	0.676471	0.884615	0.658672	0.567651	0.778295	0.648077	0.565385	0.767308	0.651059	0.600065	0.743423	0.350806	0.326055	0.145759	0.600218	7	chrX	boruta
split_3	Lymphocyte	0.869565	0.857143	0.923077	0.869565	0.780914	0.934939	0.867308	0.773077	0.936538	0.847762	0.751792	0.928571	0.731518	0.734615	0.556445	0.872966	21	SLE	boruta
split_3	natural_killer_cell	0.652174	0.647059	0.846154	0.613162	0.512182	0.749693	0.603846	0.515096	0.736538	0.622682	0.572774	0.714807	0.258065	0.228662	0.0332995	0.512475	9	chrX	boruta
split_3	natural_killer_cell	0.804348	0.793103	0.884615	0.803685	0.697195	0.890936	0.798077	0.690385	0.886538	0.776415	0.685976	0.863991	0.594912	0.600207	0.417811	0.782114	24	SLE	boruta
split_3	NK_cell_Bright	0.804348	0.774194	0.923077	0.778295	0.704183	0.890936	0.767308	0.692308	0.886538	0.743423	0.681768	0.863991	0.590099	0.556445	0.418928	0.793116	7	chrX	boruta
split_3	NK_cell_Bright	0.847826	0.88	0.846154	0.913373	0.761435	0.934562	0.923077	0.759615	0.930769	0.93311	0.745819	0.929632	0.692161	0.839719	0.516752	0.868909	25	SLE	boruta
split_3	NK_cell_Dim	0.76087	0.741935	0.884615	0.780914	0.649462	0.845807	0.773077	0.640385	0.836538	0.751792	0.646536	0.807404	0.49901	0.554755	0.324681	0.693168	7	chrX	boruta
split_3	NK_cell_Dim	0.826087	1	0.692308	0.801841	0.7301	0.913373	0.826923	0.769231	0.923077	0.849498	0.799331	0.93311	0.661765	0.671512	0.580119	0.839719	19	SLE	boruta
split_3	Non_classical_monocyte	0.782609	1	0.615385	0.75458	0.679041	0.869565	0.788462	0.730769	0.884615	0.816054	0.765886	0.899666	0.581818	0.610089	0.52105	0.769231	5	chrX	boruta
split_3	Non_classical_monocyte	0.934783	1	0.884615	0.956687	0.869565	0.978313	0.961538	0.884615	0.980769	0.966555	0.899666	0.983278	0.869565	0.916057	0.769231	0.956949	21	SLE	boruta
split_3	Plasmablast	0.676471	0.62069	1	0.485752	0.485752	0.746881	0.5625	0.5625	0.75	0.5625	0.5625	0.692308	0.32491	0.265165	0.265165	0.588348	3	chrX	boruta
split_3	Plasmablast	0.764706	0.75	0.833333	0.734602	0.639496	0.881569	0.732639	0.638889	0.878646	0.690746	0.612597	0.843842	0.524476	0.46772	0.290061	0.767682	9	SLE	boruta
split_3	Plasmacytoid_DC	0.652174	0.8125	0.5	0.469354	0.51809	0.757805	0.565385	0.561442	0.776923	0.60786	0.599843	0.783293	0.330909	0.171029	0.126402	0.576353	5	chrX	boruta
split_3	Plasmacytoid_DC	0.73913	0.71875	0.884615	0.757697	0.620246	0.84086	0.748077	0.609615	0.825288	0.728866	0.626713	0.797173	0.450199	0.509559	0.237004	0.691262	19	SLE	boruta
split_3	Progenitor_cell	0.648649	0.645161	0.909091	0.761104	0.480529	0.725286	0.733333	0.487803	0.7	0.733333	0.588778	0.709677	0.194305	0.584998	-0.0436047	0.489118	4	chrX	boruta
split_3	Progenitor_cell	0.72973	0.875	0.636364	0.673779	0.594595	0.839269	0.706061	0.627273	0.85303	0.737803	0.673776	0.871007	0.472934	0.417209	0.261785	0.693563	16	SLE	boruta
split_3	B_cell_Atypical	0.767442	0.724138	0.913043	0.856203	0.649225	0.8597	0.85	0.656522	0.856522	0.793103	0.627539	0.813468	0.523282	0.745099	0.347096	0.729861	7	chrX	boruta
split_3	B_cell_Atypical	0.813953	0.8	0.869565	0.858295	0.716589	0.906775	0.853261	0.713043	0.906522	0.802644	0.674344	0.88016	0.623632	0.729059	0.437389	0.815434	13	SLE	boruta
split_3	B_cell_Memory	0.777778	0.941176	0.64	0.796416	0.668724	0.867063	0.82	0.705	0.88	0.84	0.714444	0.893333	0.567308	0.664364	0.44	0.764601	5	chrX	boruta
split_3	B_cell_Memory	0.777778	0.857143	0.72	0.733333	0.681111	0.867063	0.73	0.69	0.875	0.710933	0.680386	0.873333	0.558824	0.46	0.383768	0.747018	17	SLE	boruta
split_3	B_cell_Naive	0.577778	0.75	0.36	0.668724	0.433457	0.675664	0.72	0.51	0.71	0.751111	0.560635	0.731966	0.197183	0.508747	0.0214669	0.471419	4	chrX	boruta
split_3	B_cell_Naive	0.844444	0.95	0.76	0.820106	0.751175	0.933132	0.84	0.77	0.93	0.857778	0.768889	0.928889	0.692683	0.696932	0.547723	0.865207	22	SLE	boruta
split_3	B_cell	0.622222	0.722222	0.52	0.570212	0.505291	0.732543	0.595	0.52	0.745	0.613611	0.565848	0.738947	0.26087	0.197233	0.0402422	0.492967	7	chrX	boruta
split_3	B_cell	0.755556	0.9375	0.6	0.668724	0.648989	0.843421	0.72	0.69	0.86	0.751111	0.700317	0.875556	0.526316	0.508747	0.407872	0.730297	10	SLE	boruta
split_3	CD4_positive,_alpha_beta_T_cell	0.847826	0.827586	0.923077	0.774671	0.749693	0.934562	0.761538	0.736538	0.930769	0.735786	0.714807	0.912053	0.684932	0.563545	0.509559	0.872966	2	chrX	boruta
split_3	CD4_positive,_alpha_beta_T_cell	0.826087	0.875	0.807692	0.761441	0.737154	0.913373	0.759615	0.734615	0.917308	0.745819	0.724956	0.912974	0.65019	0.516752	0.469231	0.828268	10	SLE	boruta
split_3	CD4_T_cell_Effector_Memory	0.717391	0.782609	0.692308	0.774671	0.605731	0.824835	0.761538	0.613462	0.823077	0.735786	0.632487	0.813346	0.434783	0.563545	0.225197	0.646675	3	chrX	boruta
split_3	CD4_T_cell_Effector_Memory	0.869565	1	0.769231	0.891561	0.778468	0.935061	0.903846	0.807692	0.942308	0.916388	0.832776	0.949833	0.743494	0.803837	0.640513	0.877058	12	SLE	boruta
split_3	CD4_T_cell_Naive	0.695652	0.730769	0.730769	0.639474	0.585588	0.80481	0.628846	0.582596	0.803846	0.638744	0.611236	0.787157	0.380769	0.277629	0.164595	0.604792	4	chrX	boruta
split_3	CD4_T_cell_Naive	0.782609	0.863636	0.730769	0.848476	0.693108	0.870062	0.853846	0.694038	0.884615	0.846154	0.694596	0.879704	0.567669	0.701646	0.389324	0.769231	14	SLE	boruta
split_3	CD4_T_cell_Treg	0.717391	0.882353	0.576923	0.665336	0.595151	0.80481	0.7	0.636538	0.821442	0.715942	0.658461	0.832776	0.453382	0.422995	0.294014	0.647548	5	chrX	boruta
split_3	CD4_T_cell_Treg	0.891304	0.888889	0.923077	0.934562	0.81901	0.956522	0.930769	0.805769	0.955769	0.912053	0.78194	0.946295	0.777563	0.867396	0.643767	0.914174	18	SLE	boruta
split_3	CD8_positive,_alpha_beta_T_cell	0.76087	0.758621	0.846154	0.845807	0.649252	0.847311	0.836538	0.640192	0.842308	0.807404	0.646484	0.818779	0.504892	0.691262	0.285191	0.692831	6	chrX	boruta
split_3	CD8_positive,_alpha_beta_T_cell	0.782609	0.807692	0.807692	0.783432	0.674693	0.870062	0.790385	0.676923	0.878846	0.783293	0.67408	0.862598	0.557692	0.576353	0.350823	0.752042	13	SLE	boruta
split_3	CD8_T_cell_Cytotoxic_GZMH_	0.652174	0.619048	1	0.645992	0.45537	0.677617	0.65	0.525	0.675	0.65	0.577778	0.666667	0.220339	0.441588	0.169967	0.483046	5	chrX	boruta
split_3	CD8_T_cell_Cytotoxic_GZMH_	0.782609	0.833333	0.769231	0.804816	0.674684	0.870062	0.803846	0.676923	0.878846	0.787157	0.67893	0.863991	0.562738	0.604792	0.350823	0.75193	23	SLE	boruta
split_3	CD8_T_cell_Cytotoxic_GZMK_	0.630435	0.736842	0.538462	0.587933	0.518116	0.73913	0.594231	0.530769	0.757692	0.619844	0.581271	0.763434	0.277264	0.187562	0.0634182	0.516752	2	chrX	boruta
split_3	CD8_T_cell_Cytotoxic_GZMK_	0.847826	0.952381	0.769231	0.760078	0.757805	0.934581	0.776923	0.771154	0.931058	0.780672	0.779996	0.93311	0.699065	0.557612	0.548439	0.867472	19	SLE	boruta
split_3	CD8_T_cell_MAIT	0.704545	0.761905	0.666667	0.659622	0.590909	0.817033	0.658333	0.599792	0.812708	0.645586	0.604929	0.792863	0.411523	0.315682	0.202004	0.633333	8	chrX	boruta
split_3	CD8_T_cell_MAIT	0.772727	0.9375	0.625	0.818182	0.665501	0.863919	0.825	0.695833	0.875	0.811364	0.701299	0.886364	0.556452	0.65	0.427618	0.759555	15	SLE	boruta
split_3	CD8_T_cell_Naive	0.586957	0.62069	0.692308	0.537421	0.457821	0.69571	0.526923	0.451827	0.690385	0.578941	0.542988	0.686198	0.144814	0.055301	-0.0997262	0.381197	3	chrX	boruta
split_3	CD8_T_cell_Naive	0.869565	0.884615	0.884615	0.826087	0.782609	0.935061	0.823077	0.778846	0.942308	0.802933	0.761063	0.93311	0.734615	0.646154	0.564541	0.877058	11	SLE	boruta
split_3	Classical_monocyte	0.869565	1	0.769231	0.847322	0.778468	0.935061	0.865385	0.807692	0.942308	0.882943	0.832776	0.949833	0.743494	0.735738	0.640513	0.877058	2	chrX	boruta
split_3	Classical_monocyte	0.978261	1	0.961538	0.956687	0.935061	1	0.961538	0.942308	1	0.966555	0.949833	1	0.956023	0.916057	0.877058	1	23	SLE	boruta
split_3	Conventional_DC	0.608696	0.681818	0.576923	0.576092	0.498307	0.73913	0.611538	0.494231	0.734615	0.636343	0.562408	0.7307	0.221805	0.235901	-0.0114834	0.469231	2	chrX	boruta
split_3	Conventional_DC	0.913043	0.892857	0.961538	0.934562	0.843631	0.978187	0.930769	0.830769	0.975	0.912053	0.797173	0.962963	0.821012	0.867396	0.691262	0.95646	15	SLE	boruta
split_3	Lymphocyte	0.586957	0.612903	0.730769	0.575035	0.459212	0.693279	0.573077	0.455577	0.684615	0.604051	0.545043	0.679885	0.134653	0.175655	-0.100931	0.380769	7	chrX	boruta
split_3	Lymphocyte	0.869565	0.857143	0.923077	0.826749	0.782609	0.934939	0.828846	0.778846	0.936538	0.815426	0.751792	0.929632	0.731518	0.652691	0.563545	0.872966	21	SLE	boruta
split_3	natural_killer_cell	0.695652	0.6875	0.846154	0.733954	0.557469	0.795203	0.723077	0.553846	0.780769	0.707469	0.593311	0.758118	0.358566	0.464372	0.125157	0.600411	9	chrX	boruta
split_3	natural_killer_cell	0.804348	0.774194	0.923077	0.868548	0.693096	0.889862	0.861538	0.684423	0.880769	0.834687	0.676327	0.850652	0.590099	0.734465	0.418707	0.782114	24	SLE	boruta
split_3	NK_cell_Bright	0.76087	0.857143	0.692308	0.653491	0.652042	0.848186	0.657692	0.663462	0.859615	0.664944	0.671823	0.863036	0.527103	0.312986	0.326923	0.715798	7	chrX	boruta
split_3	NK_cell_Bright	0.891304	0.92	0.884615	0.913043	0.80481	0.956687	0.911538	0.803846	0.961538	0.895549	0.787157	0.962963	0.780115	0.823077	0.604792	0.916057	25	SLE	boruta
split_3	NK_cell_Dim	0.782609	0.785714	0.846154	0.718067	0.669587	0.870062	0.715385	0.659615	0.873077	0.707559	0.660939	0.850652	0.552529	0.428713	0.327856	0.740593	7	chrX	boruta
split_3	NK_cell_Dim	0.826087	0.95	0.730769	0.891561	0.734161	0.913373	0.903846	0.757692	0.923077	0.916388	0.7644	0.929632	0.657993	0.803837	0.523501	0.839719	19	SLE	boruta
split_3	Non_classical_monocyte	0.782609	0.944444	0.653846	0.80481	0.685117	0.870059	0.815385	0.713462	0.884615	0.813346	0.730383	0.896321	0.577206	0.627758	0.453089	0.769231	5	chrX	boruta
split_3	Non_classical_monocyte	0.956522	0.928571	1	0.956183	0.911318	1	0.95	0.9	1	0.928571	0.866667	1	0.910506	0.914174	0.832666	1	21	SLE	boruta
split_3	Plasmablast	0.558824	0.571429	0.666667	0.605558	0.407637	0.684068	0.607639	0.40625	0.691146	0.591077	0.489706	0.647277	0.105263	0.229686	-0.19016	0.408491	3	chrX	boruta
split_3	Plasmablast	0.794118	0.866667	0.722222	0.647059	0.67224	0.911536	0.645833	0.684028	0.913194	0.620915	0.662645	0.895425	0.591065	0.291667	0.378032	0.824958	9	SLE	boruta
split_3	Plasmacytoid_DC	0.478261	1	0.0769231	0.467432	0.263505	0.43123	0.596154	0.5	0.576923	0.648829	0.565217	0.632107	0.0675676	0.306282	0	0.270666	5	chrX	boruta
split_3	Plasmacytoid_DC	0.804348	0.947368	0.692308	0.801841	0.709958	0.891561	0.826923	0.732692	0.903846	0.849498	0.748116	0.916388	0.617375	0.671512	0.489747	0.803837	19	SLE	boruta
split_3	Progenitor_cell	0.405405	0	0	0.233888	0.233888	0.233888	0.5	0.5	0.5	0.594595	0.594595	0.594595	0	0	0	0	4	chrX	boruta
split_3	Progenitor_cell	0.594595	0.888889	0.363636	0.668521	0.43628	0.693034	0.716667	0.557576	0.75	0.755631	0.628133	0.797297	0.260985	0.454484	0.130655	0.537086	16	SLE	boruta
split_3	B_cell_Atypical	0.604651	0.588235	0.869565	0.699336	0.447861	0.685574	0.703261	0.488043	0.684783	0.660937	0.529014	0.649478	0.175874	0.479961	-0.0323083	0.459307	7	chrX	boruta
split_3	B_cell_Atypical	0.767442	0.933333	0.608696	0.68277	0.65453	0.8591	0.71413	0.68913	0.869565	0.717476	0.683752	0.878665	0.544492	0.476229	0.410807	0.75403	13	SLE	boruta
split_3	B_cell_Memory	0.688889	0.866667	0.52	0.751175	0.563767	0.777119	0.775	0.615	0.795	0.784722	0.633778	0.804444	0.4	0.570938	0.252982	0.604691	5	chrX	boruta
split_3	B_cell_Memory	0.711111	0.928571	0.52	0.675664	0.582996	0.801569	0.715	0.64	0.8205	0.731966	0.662222	0.84	0.445498	0.471419	0.33541	0.664364	17	SLE	boruta
split_3	B_cell_Naive	0.555556	0.692308	0.36	0.570212	0.417367	0.64339	0.595	0.47475	0.675	0.613611	0.544333	0.689504	0.150943	0.197233	-0.0601444	0.389148	4	chrX	boruta
split_3	B_cell_Naive	0.733333	0.842105	0.64	0.687967	0.62933	0.822751	0.7	0.65	0.84	0.695906	0.656825	0.838384	0.475728	0.402422	0.311271	0.684274	22	SLE	boruta
split_3	B_cell	0.711111	0.714286	0.8	0.707576	0.596197	0.81893	0.7	0.59	0.81	0.68254	0.605926	0.777778	0.406091	0.40996	0.182574	0.63901	7	chrX	boruta
split_3	B_cell	0.711111	0.8	0.64	0.705934	0.598814	0.822574	0.73	0.61	0.825	0.734444	0.622456	0.806989	0.429268	0.477512	0.221332	0.646135	10	SLE	boruta
split_3	CD4_positive,_alpha_beta_T_cell	0.782609	0.9	0.692308	0.826087	0.674693	0.870062	0.840385	0.7	0.884615	0.846405	0.704308	0.896321	0.572491	0.680769	0.400775	0.769231	2	chrX	boruta
split_3	CD4_positive,_alpha_beta_T_cell	0.782609	0.9	0.692308	0.780962	0.689855	0.870062	0.801923	0.707692	0.884615	0.813174	0.709699	0.882943	0.572491	0.613356	0.415385	0.769231	10	SLE	boruta
split_3	CD4_T_cell_Effector_Memory	0.695652	0.833333	0.576923	0.740124	0.585589	0.8037	0.740385	0.617308	0.815385	0.7307	0.637793	0.813346	0.408088	0.477113	0.238462	0.627758	3	chrX	boruta
split_3	CD4_T_cell_Effector_Memory	0.717391	0.933333	0.538462	0.704949	0.587338	0.8037	0.75	0.644231	0.826923	0.782609	0.668339	0.846405	0.459313	0.550482	0.322019	0.671512	12	SLE	boruta
split_3	CD4_T_cell_Naive	0.586957	0.666667	0.538462	0.544558	0.458792	0.71377	0.55	0.473077	0.719231	0.592133	0.552823	0.715928	0.183178	0.0995227	-0.055301	0.438529	4	chrX	boruta
split_3	CD4_T_cell_Naive	0.782609	0.9	0.692308	0.826746	0.672834	0.891561	0.834615	0.694231	0.892308	0.829735	0.700897	0.896321	0.572491	0.664141	0.398957	0.78087	14	SLE	boruta
split_3	CD4_T_cell_Treg	0.586957	1	0.269231	0.624569	0.392994	0.652281	0.692308	0.557692	0.711538	0.732441	0.615385	0.749164	0.242634	0.46225	0.231662	0.491689	5	chrX	boruta
split_3	CD4_T_cell_Treg	0.869565	0.954545	0.807692	0.848186	0.782609	0.956522	0.859615	0.796154	0.955769	0.863036	0.79699	0.949833	0.740602	0.715798	0.592308	0.911538	18	SLE	boruta
split_3	CD8_positive,_alpha_beta_T_cell	0.73913	0.769231	0.769231	0.733954	0.629212	0.845807	0.723077	0.626923	0.840385	0.707469	0.640268	0.818779	0.469231	0.464372	0.252634	0.68927	6	chrX	boruta
split_3	CD8_positive,_alpha_beta_T_cell	0.73913	0.75	0.807692	0.664923	0.625531	0.843631	0.653846	0.615385	0.834615	0.655842	0.63241	0.807404	0.463035	0.325381	0.237004	0.68927	13	SLE	boruta
split_3	CD8_T_cell_Cytotoxic_GZMH_	0.630435	0.736842	0.538462	0.629212	0.511897	0.740124	0.644231	0.528846	0.757692	0.657631	0.580653	0.763434	0.277264	0.290423	0.0615385	0.523501	5	chrX	boruta
split_3	CD8_T_cell_Cytotoxic_GZMH_	0.76087	0.941176	0.615385	0.7301	0.652281	0.848186	0.769231	0.694231	0.865385	0.799331	0.713907	0.882943	0.537477	0.580119	0.421182	0.735738	23	SLE	boruta
split_3	CD8_T_cell_Cytotoxic_GZMK_	0.543478	1	0.192308	0.501812	0.352484	0.565835	0.615385	0.538462	0.653846	0.665552	0.598662	0.698997	0.171527	0.339683	0.186989	0.402422	2	chrX	boruta
split_3	CD8_T_cell_Cytotoxic_GZMK_	0.847826	0.88	0.846154	0.891561	0.76006	0.934562	0.903846	0.7575	0.930769	0.916388	0.743423	0.916388	0.692161	0.803837	0.516752	0.867396	19	SLE	boruta
split_3	CD8_T_cell_MAIT	0.659091	0.8	0.5	0.540946	0.522145	0.768939	0.591667	0.566667	0.783333	0.606061	0.585859	0.774411	0.337349	0.210819	0.149071	0.573886	8	chrX	boruta
split_3	CD8_T_cell_MAIT	0.818182	0.9	0.75	0.722727	0.722727	0.909091	0.741667	0.729167	0.9125	0.737689	0.715152	0.905303	0.639344	0.500298	0.463949	0.821584	15	SLE	boruta
split_3	CD8_T_cell_Naive	0.478261	0.75	0.115385	0.43123	0.263505	0.470164	0.576923	0.463462	0.596154	0.632107	0.556299	0.648829	0.0580205	0.270666	-0.169967	0.306282	3	chrX	boruta
split_3	CD8_T_cell_Naive	0.804348	0.947368	0.692308	0.935061	0.704949	0.891769	0.942308	0.732596	0.903846	0.949833	0.746894	0.916388	0.617375	0.877058	0.489747	0.803837	11	SLE	boruta
split_3	Classical_monocyte	0.847826	1	0.730769	0.704949	0.75458	0.935061	0.75	0.788462	0.942308	0.782609	0.816054	0.949833	0.702403	0.550482	0.610089	0.877058	2	chrX	boruta
split_3	Classical_monocyte	0.934783	0.96	0.923077	0.978313	0.870059	0.978313	0.980769	0.873077	0.980769	0.983278	0.862598	0.983278	0.868069	0.956949	0.74048	0.956949	23	SLE	boruta
split_3	Conventional_DC	0.586957	0.769231	0.384615	0.556936	0.441958	0.685354	0.586538	0.509615	0.719231	0.616952	0.570095	0.732441	0.218247	0.180144	0.0217104	0.46225	2	chrX	boruta
split_3	Conventional_DC	0.891304	0.888889	0.923077	0.911318	0.804816	0.956687	0.9	0.803846	0.961538	0.866667	0.78194	0.962963	0.777563	0.832666	0.606022	0.916057	15	SLE	boruta
split_3	Lymphocyte	0.630435	0.628571	0.846154	0.54468	0.492957	0.7096	0.548077	0.498077	0.7	0.590075	0.564274	0.687453	0.206897	0.120156	-0.0053082	0.464398	7	chrX	boruta
split_3	Lymphocyte	0.826087	0.875	0.807692	0.848186	0.737096	0.913375	0.859615	0.732692	0.917308	0.863036	0.724956	0.912974	0.65019	0.715798	0.468549	0.828268	21	SLE	boruta
split_3	natural_killer_cell	0.652174	0.777778	0.538462	0.568772	0.52338	0.757919	0.617308	0.555769	0.771154	0.643684	0.595846	0.780672	0.323529	0.258303	0.112297	0.557612	9	chrX	boruta
split_3	natural_killer_cell	0.695652	0.676471	0.884615	0.677899	0.557063	0.790621	0.667308	0.553846	0.775288	0.663634	0.593311	0.750177	0.350806	0.377761	0.125157	0.606022	24	SLE	boruta
split_3	NK_cell_Bright	0.608696	0.785714	0.423077	0.679041	0.468323	0.71377	0.730769	0.528846	0.744231	0.765886	0.580653	0.763434	0.255396	0.52105	0.0634182	0.516542	7	chrX	boruta
split_3	NK_cell_Bright	0.73913	0.85	0.653846	0.805184	0.63313	0.845883	0.809615	0.661538	0.84625	0.799331	0.671823	0.849498	0.486989	0.613941	0.326923	0.701646	25	SLE	boruta
split_3	NK_cell_Dim	0.673913	0.72	0.692308	0.693279	0.561919	0.783432	0.684615	0.557692	0.784615	0.679885	0.59609	0.77146	0.340344	0.375046	0.115385	0.564902	7	chrX	boruta
split_3	NK_cell_Dim	0.891304	1	0.807692	0.869565	0.824769	0.956687	0.884615	0.846154	0.961538	0.899666	0.866221	0.966555	0.785047	0.769231	0.703211	0.916057	19	SLE	boruta
split_3	Non_classical_monocyte	0.76087	0.941176	0.615385	0.869565	0.652281	0.848186	0.884615	0.694231	0.865385	0.899666	0.71584	0.882943	0.537477	0.769231	0.422904	0.735738	5	chrX	boruta
split_3	Non_classical_monocyte	0.934783	0.96	0.923077	0.934939	0.869565	1	0.936538	0.867308	1	0.929632	0.847762	1	0.868069	0.868909	0.734615	1	21	SLE	boruta
split_3	Plasmablast	0.617647	0.619048	0.722222	0.631545	0.466873	0.754363	0.635417	0.465278	0.753472	0.609069	0.513072	0.705288	0.224561	0.296683	-0.0704295	0.527778	3	chrX	boruta
split_3	Plasmablast	0.764706	0.777778	0.777778	0.759752	0.644607	0.882353	0.774306	0.645833	0.881944	0.766068	0.620915	0.869281	0.527778	0.573006	0.291667	0.767839	9	SLE	boruta
split_3	Plasmacytoid_DC	0.608696	0.681818	0.576923	0.523561	0.495533	0.718094	0.519231	0.5	0.726923	0.574972	0.565217	0.724956	0.221805	0.0381691	0	0.453253	5	chrX	boruta
split_3	Plasmacytoid_DC	0.695652	0.657895	0.961538	0.610248	0.539382	0.763908	0.611538	0.561538	0.75	0.626474	0.597324	0.722222	0.334711	0.291756	0.181164	0.577497	19	SLE	boruta
split_3	Progenitor_cell	0.432432	0.666667	0.0909091	0.417694	0.222576	0.436331	0.557576	0.433333	0.590909	0.631941	0.581695	0.666199	0.0201765	0.165374	-0.244358	0.258311	4	chrX	boruta
split_3	Progenitor_cell	0.594595	0.769231	0.454545	0.515647	0.456298	0.723768	0.527273	0.50447	0.740909	0.608415	0.596769	0.773767	0.232365	0.0540562	0.00897138	0.492405	16	SLE	boruta
split_3	B_cell_Atypical	0.697674	0.692308	0.782609	0.603788	0.574884	0.813953	0.601087	0.572826	0.813043	0.593655	0.575029	0.774809	0.386389	0.203059	0.153104	0.632599	7	chrX	boruta
split_3	B_cell_Atypical	0.930233	0.954545	0.913043	0.930308	0.860465	1	0.931522	0.863043	1	0.918053	0.840435	1	0.860238	0.861173	0.724514	1	13	SLE	boruta
split_3	B_cell_Memory	0.711111	0.75	0.72	0.733333	0.598814	0.820963	0.73	0.595	0.815	0.710933	0.6096	0.794489	0.41791	0.46	0.19	0.63901	5	chrX	boruta
split_3	B_cell_Memory	0.844444	0.846154	0.88	0.932517	0.752564	0.933132	0.925	0.745	0.93	0.892857	0.718889	0.908406	0.683417	0.871165	0.503027	0.865207	17	SLE	boruta
split_3	B_cell_Naive	0.644444	0.695652	0.64	0.800594	0.527622	0.756281	0.805	0.525	0.765	0.789697	0.568615	0.751111	0.287129	0.606373	0.0511979	0.53	4	chrX	boruta
split_3	B_cell_Naive	0.866667	0.88	0.88	0.756281	0.776203	0.933531	0.76	0.77	0.94	0.744646	0.749521	0.928889	0.73	0.516908	0.55	0.874767	22	SLE	boruta
split_3	B_cell	0.733333	0.882353	0.6	0.705934	0.621399	0.822574	0.73	0.655	0.84	0.734444	0.664314	0.84	0.480769	0.477512	0.327968	0.695837	7	chrX	boruta
split_3	B_cell	0.8	0.807692	0.84	0.776203	0.707576	0.889219	0.77	0.7	0.895	0.742222	0.68254	0.875556	0.592965	0.547723	0.411039	0.785302	10	SLE	boruta
split_3	CD4_positive,_alpha_beta_T_cell	0.869565	0.8125	1	0.864803	0.763908	0.933917	0.85	0.75	0.925	0.8125	0.722222	0.896552	0.7251	0.754155	0.600925	0.872966	2	chrX	boruta
split_3	CD4_positive,_alpha_beta_T_cell	0.826087	0.909091	0.769231	0.956522	0.734161	0.913373	0.955769	0.744231	0.917308	0.946295	0.740347	0.916388	0.654135	0.911538	0.488564	0.828268	10	SLE	boruta
split_3	CD4_T_cell_Effector_Memory	0.673913	0.72	0.692308	0.826746	0.549147	0.783437	0.834615	0.55	0.784615	0.829735	0.592133	0.77146	0.340344	0.664141	0.0995227	0.564902	3	chrX	boruta
split_3	CD4_T_cell_Effector_Memory	0.913043	1	0.846154	0.913373	0.847322	0.978313	0.923077	0.865385	0.980769	0.93311	0.882943	0.983278	0.827068	0.839719	0.735738	0.956949	12	SLE	boruta
split_3	CD4_T_cell_Naive	0.695652	0.7	0.807692	0.803685	0.574666	0.801752	0.798077	0.565096	0.792308	0.776415	0.599893	0.766834	0.366142	0.600207	0.137936	0.600411	4	chrX	boruta
split_3	CD4_T_cell_Naive	0.826087	0.78125	0.961538	0.795203	0.723913	0.890936	0.780769	0.711538	0.886538	0.750177	0.695062	0.863991	0.633466	0.618233	0.494608	0.793116	14	SLE	boruta
split_3	CD4_T_cell_Treg	0.565217	0.875	0.269231	0.530711	0.392994	0.633189	0.603846	0.526923	0.692308	0.637458	0.580825	0.732441	0.198606	0.249615	0.0792594	0.46225	5	chrX	boruta
split_3	CD4_T_cell_Treg	0.869565	1	0.769231	0.913373	0.778468	0.935061	0.923077	0.807692	0.942308	0.93311	0.832776	0.949833	0.743494	0.839719	0.640513	0.877058	18	SLE	boruta
split_3	CD8_positive,_alpha_beta_T_cell	0.826087	0.821429	0.884615	0.890936	0.729606	0.913043	0.886538	0.717308	0.911538	0.863991	0.707469	0.895549	0.642023	0.778333	0.464372	0.824319	6	chrX	boruta
split_3	CD8_positive,_alpha_beta_T_cell	0.76087	0.727273	0.923077	0.79038	0.640537	0.843631	0.775	0.636538	0.830769	0.742857	0.642231	0.797173	0.492986	0.639196	0.326055	0.715626	13	SLE	boruta
split_3	CD8_T_cell_Cytotoxic_GZMH_	0.608696	0.833333	0.384615	0.57764	0.46683	0.709958	0.648077	0.540385	0.738462	0.681104	0.588629	0.763434	0.263345	0.355933	0.10346	0.516542	5	chrX	boruta
split_3	CD8_T_cell_Cytotoxic_GZMH_	0.891304	1	0.807692	0.913373	0.824769	0.956687	0.923077	0.846154	0.961538	0.93311	0.866221	0.966555	0.785047	0.839719	0.703211	0.916057	23	SLE	boruta
split_3	CD8_T_cell_Cytotoxic_GZMK_	0.586957	0.64	0.615385	0.498345	0.458843	0.695652	0.511538	0.461538	0.690673	0.571026	0.547699	0.693144	0.164436	0.0232338	-0.0765559	0.381197	2	chrX	boruta
split_3	CD8_T_cell_Cytotoxic_GZMK_	0.847826	0.88	0.846154	0.870059	0.760077	0.934939	0.878846	0.759519	0.936538	0.879675	0.743423	0.929632	0.692161	0.75193	0.516752	0.868909	19	SLE	boruta
split_3	CD8_T_cell_MAIT	0.681818	0.708333	0.708333	0.636364	0.567052	0.794919	0.633333	0.5625	0.791667	0.626263	0.579545	0.761174	0.358333	0.266667	0.125656	0.588006	8	chrX	boruta
split_3	CD8_T_cell_MAIT	0.863636	0.909091	0.833333	0.909091	0.772657	0.931924	0.916667	0.778958	0.9375	0.924242	0.757576	0.943182	0.727273	0.833333	0.558333	0.872278	15	SLE	boruta
split_3	CD8_T_cell_Naive	0.521739	1	0.153846	0.501812	0.309426	0.536121	0.615385	0.519231	0.635577	0.665552	0.58194	0.68311	0.136519	0.339683	0.130744	0.373116	3	chrX	boruta
split_3	CD8_T_cell_Naive	0.847826	0.88	0.846154	0.84819	0.76006	0.934939	0.848077	0.753846	0.936538	0.831572	0.740347	0.929632	0.692161	0.692831	0.511144	0.868909	11	SLE	boruta
split_3	Classical_monocyte	0.847826	1	0.730769	0.913373	0.75458	0.935061	0.923077	0.788462	0.942308	0.93311	0.816054	0.949833	0.702403	0.839719	0.610089	0.877058	2	chrX	boruta
split_3	Classical_monocyte	0.978261	0.962963	1	0.956183	0.933917	1	0.95	0.925	1	0.928571	0.896552	1	0.955513	0.914174	0.872966	1	23	SLE	boruta
split_3	Conventional_DC	0.608696	0.722222	0.5	0.601242	0.477987	0.71806	0.630769	0.505769	0.738462	0.650502	0.568084	0.740347	0.238971	0.272218	0.0114834	0.485002	2	chrX	boruta
split_3	Conventional_DC	0.913043	0.892857	0.961538	0.869565	0.843631	0.978187	0.867308	0.830769	0.975	0.847762	0.797173	0.962963	0.821012	0.734615	0.68927	0.95646	15	SLE	boruta
split_3	Lymphocyte	0.630435	1	0.346154	0.534557	0.467432	0.704949	0.634615	0.596154	0.75	0.682274	0.648829	0.782609	0.315236	0.371574	0.306282	0.550482	7	chrX	boruta
split_3	Lymphocyte	0.891304	0.92	0.884615	0.934939	0.81901	0.956687	0.936538	0.815385	0.961538	0.929632	0.799331	0.963143	0.780115	0.868909	0.64461	0.916057	21	SLE	boruta
split_3	natural_killer_cell	0.673913	0.703704	0.730769	0.664923	0.561919	0.780914	0.653846	0.557404	0.773077	0.655842	0.595917	0.761063	0.332689	0.325381	0.114889	0.556445	9	chrX	boruta
split_3	natural_killer_cell	0.804348	0.84	0.807692	0.737096	0.696812	0.891769	0.728846	0.701923	0.898077	0.714465	0.700235	0.882943	0.604207	0.464901	0.414654	0.793116	24	SLE	boruta
split_3	NK_cell_Bright	0.804348	0.757576	0.961538	0.795203	0.688465	0.888308	0.780769	0.680769	0.875	0.750177	0.671427	0.83871	0.58517	0.618233	0.441588	0.793116	7	chrX	boruta
split_3	NK_cell_Bright	0.847826	0.851852	0.884615	0.866977	0.757697	0.934562	0.855769	0.748077	0.930769	0.823021	0.735777	0.912053	0.688588	0.740593	0.511144	0.867396	25	SLE	boruta
split_3	NK_cell_Dim	0.717391	0.842105	0.615385	0.693347	0.605731	0.826746	0.713462	0.625	0.834615	0.7199	0.64372	0.829783	0.44732	0.433647	0.258303	0.664141	7	chrX	boruta
split_3	NK_cell_Dim	0.847826	1	0.730769	0.869565	0.75458	0.935061	0.884615	0.788462	0.942308	0.899666	0.816054	0.949833	0.702403	0.769231	0.610089	0.877058	19	SLE	boruta
split_3	Non_classical_monocyte	0.76087	0.941176	0.615385	0.659557	0.649339	0.869565	0.705769	0.688365	0.873077	0.730383	0.713697	0.882943	0.537477	0.453089	0.420892	0.74048	5	chrX	boruta
split_3	Non_classical_monocyte	0.913043	1	0.846154	0.935061	0.847322	0.978313	0.942308	0.865385	0.980769	0.949833	0.882943	0.983278	0.827068	0.877058	0.735738	0.956949	21	SLE	boruta
split_3	Plasmablast	0.647059	0.607143	0.944444	0.629597	0.466418	0.726925	0.65625	0.534722	0.725694	0.62069	0.547333	0.677181	0.266187	0.440415	0.102869	0.540062	3	chrX	boruta
split_3	Plasmablast	0.764706	0.8125	0.722222	0.70384	0.644608	0.882353	0.711806	0.652604	0.881944	0.686041	0.631815	0.869281	0.531034	0.42962	0.309326	0.767682	9	SLE	boruta
split_3	Plasmacytoid_DC	0.673913	0.73913	0.653846	0.696805	0.561919	0.783432	0.701923	0.557692	0.790385	0.700897	0.59609	0.780672	0.347826	0.400775	0.115385	0.576353	5	chrX	boruta
split_3	Plasmacytoid_DC	0.804348	0.774194	0.923077	0.815942	0.693096	0.889862	0.8	0.684423	0.880769	0.764706	0.676327	0.850652	0.590099	0.677365	0.418707	0.782114	19	SLE	boruta
split_3	Progenitor_cell	0.648649	0.655172	0.863636	0.720201	0.481892	0.736435	0.698485	0.475758	0.710606	0.7122	0.583181	0.718424	0.212766	0.426414	-0.0553361	0.502359	4	chrX	boruta
split_3	Progenitor_cell	0.675676	0.916667	0.5	0.702703	0.535463	0.784732	0.728788	0.615152	0.818182	0.755364	0.669287	0.85258	0.391781	0.457576	0.25461	0.64422	16	SLE	boruta
[truncated: 7,546 more rows]

## Sheet: Supplementary Table 2
gene	chrY	chrX	chrPAR	Xie_Carrel2005	Xive_Carrel2005	Xie_Zhang2013	Xive_Zhang2013	Xie_Balaton2015	Xive_Balaton2015	Ximve_Balaton2015	Xid_Balaton2015	Xie_Cotton2013	Xive_Cotton2013	Xie_Tukiainen2017	Xive_Tukiainen2017	Xietiss_Tukiainen2017	XivetissHet_Tukiainen2017	XivetissSim_Tukiainen2017	Xiesc_Tukiainen2017	Xivesc_Tukiainen2017	XieESPMCS_Tukiainen2017	XieSTMACH_Tukiainen2017	XieESPMSL_Tukiainen2017	XieARTAORT_Tukiainen2017	XieLUNG_Tukiainen2017	XieARTCRN_Tukiainen2017	XieSKINS_Tukiainen2017	XieUTERUS_Tukiainen2017	XieLCL_Tukiainen2017	XiePNCREAS_Tukiainen2017	XieKDNCTX_Tukiainen2017	XieVAGINA_Tukiainen2017	XieCLNTRN_Tukiainen2017	XieWHLBLD_Tukiainen2017	XieLIVER_Tukiainen2017	XieTHYROID_Tukiainen2017	sexMal_Tukiainen2017	sexFem_Tukiainen2017	sexHet_Tukiainen2017	sexDE_Jansen2014	sexDE_Mele2015	popDE_Mele2015	ageDE_Mele2015	sexDE_Oliva2020	sexDEfemX_Oliva2020	sexDEmalX_Oliva2020	sextissDE_Oliva2020	iSEXs_Bongen2019	A_iSEXs_Bongen2019
PLCXD1	0	1	0	1	0	0	0	0	0	0	0	1	0	1	0	0	0	1	0	1	1	1	1	0	1	1	1	1	1	1	1	1	1	0	1	0	1	0	0	0	0	0	0	0	0	1	0	0	0
GTPBP6	0	1	0	1	0	0	0	1	0	0	0	1	0	1	0	0	0	1	0	1	1	1	1	1	1	1	1	1	1	1	1	1	1	0	1	1	1	0	0	0	0	0	0	0	0	1	0	0	0
PPP2R3B	0	1	0	1	0	0	0	1	0	0	0	1	0	1	0	0	0	1	0	1	1	1	1	1	1	1	1	1	1	1	1	1	1	1	1	1	1	0	0	0	0	0	0	0	0	1	0	0	0
SHOX	0	1	0	1	0	0	0	1	0	0	0	0	0	1	0	0	0	0	0	0	0	0	0	0	0	0	0	0	0	0	0	0	0	0	0	0	1	0	0	0	0	0	0	0	0	1	0	0	0
CRLF2	0	1	0	0	0	0	0	1	0	0	0	0	0	0	0	0	0	0	0	0	0	0	0	0	0	0	0	0	0	0	0	0	0	0	0	0	0	0	0	0	0	0	0	0	0	1	0	0	0
CSF2RA	0	1	0	0	0	0	0	1	0	0	0	1	0	1	0	0	0	0	0	1	0	0	0	0	0	0	0	0	0	0	0	0	0	0	0	0	1	0	0	0	0	0	0	0	0	1	0	0	0
IL3RA	0	1	0	0	0	0	0	1	0	0	0	1	0	1	0	0	0	1	0	1	1	1	1	1	1	0	1	1	1	1	1	1	1	1	0	1	1	0	0	0	0	0	0	0	0	1	0	0	0
SLC25A6	0	1	0	1	0	0	0	1	0	0	0	0	0	1	0	0	1	0	0	1	1	1	1	1	1	1	1	1	1	1	1	1	1	1	1	1	1	0	0	0	0	0	0	0	0	1	0	0	0
LINC00106	0	1	0	1	0	0	0	0	0	0	0	0	0	1	0	0	0	1	0	0	0	0	0	0	1	0	0	0	1	0	0	0	0	0	0	0	0	0	0	0	0	0	0	0	0	1	0	0	0
ASMTL.AS1	0	1	0	0	0	0	0	1	0	0	0	0	0	0	0	0	0	0	0	0	0	0	0	0	0	0	0	0	0	0	0	0	0	0	0	0	0	0	0	0	0	0	0	0	0	1	0	0	0
ASMTL	0	1	0	1	0	0	0	1	0	0	0	1	0	1	0	0	0	1	0	1	1	1	1	1	1	1	1	1	1	1	1	1	1	1	1	1	1	0	0	0	1	0	0	0	0	1	0	0	0
P2RY8	0	1	0	0	0	0	0	1	0	0	0	1	0	1	0	0	0	1	0	1	0	0	0	0	1	0	0	0	1	0	0	0	0	1	0	1	1	0	0	1	1	0	0	0	0	1	0	0	0
AKAP17A	0	1	0	1	0	0	0	1	0	0	0	0	0	1	0	0	0	1	0	0	1	1	1	1	1	1	1	1	1	1	1	1	1	1	1	1	1	0	0	0	0	0	0	0	0	1	0	0	0
ASMT	0	1	0	0	0	0	0	1	0	0	0	1	0	1	0	0	0	0	0	0	0	0	0	0	0	0	0	0	0	0	0	0	0	0	0	0	0	1	0	0	1	0	0	0	1	0	0	0	0
DHRSX	0	1	0	1	0	0	0	1	0	0	0	1	0	1	0	0	0	1	0	1	0	1	0	0	0	0	0	0	0	0	0	0	0	0	0	0	1	0	0	1	1	0	0	0	0	1	0	0	0
DHRSX.IT1	0	1	0	0	0	0	0	0	0	0	0	0	0	0	0	0	0	0	0	0	0	0	0	0	0	0	0	0	0	0	0	0	0	0	0	0	0	0	0	0	0	1	0	0	0	1	0	0	0
ZBED1	0	1	0	1	0	0	0	1	0	0	0	0	0	1	0	0	1	0	0	1	1	1	1	1	1	1	1	1	1	1	1	1	1	1	1	1	1	0	0	1	1	0	0	0	0	1	0	1	0
CD99P1	0	1	0	1	0	0	0	1	0	0	0	0	0	0	0	0	0	0	0	0	0	0	0	0	0	0	0	0	0	0	0	0	0	0	0	0	0	0	0	0	0	0	0	0	0	1	0	0	0
LINC00102	0	1	0	0	0	0	0	1	0	0	0	0	0	0	0	0	0	0	0	0	0	0	0	0	0	0	0	0	0	0	0	0	0	0	0	0	0	0	0	0	0	0	0	0	0	1	0	0	0
CD99	0	1	0	1	0	0	0	1	0	0	0	1	0	1	0	0	1	0	0	1	1	1	1	1	0	1	1	1	0	0	0	0	0	0	0	0	1	0	0	1	1	0	0	0	0	1	0	1	0
XG	0	1	0	1	0	0	0	1	0	0	0	1	0	1	0	0	0	0	0	0	0	0	0	0	0	0	0	0	0	0	0	0	0	0	0	0	0	1	0	0	1	0	1	0	1	0	0	0	0
GYG2	0	1	0	1	0	0	0	0	1	0	0	0	1	1	0	0	1	0	0	0	0	1	0	0	0	0	0	0	0	0	0	0	0	0	1	0	0	1	0	0	1	0	1	0	1	0	0	0	0
ARSD	0	1	0	1	0	0	0	0	1	0	0	0	1	1	0	0	0	1	0	1	0	0	0	0	0	0	0	0	0	0	0	0	0	0	1	0	0	1	0	1	1	0	0	0	1	0	0	0	0
ARSH	0	1	0	0	0	0	0	1	0	0	0	1	0	1	0	0	0	0	0	0	0	0	0	0	0	0	0	0	0	0	0	0	0	0	0	0	0	0	0	0	0	0	0	0	1	0	0	0	0
ARSF	0	1	0	0	0	0	0	0	0	0	0	1	0	1	0	0	0	0	0	0	0	0	0	0	0	0	0	0	0	0	0	0	0	0	0	0	0	0	0	0	0	0	0	0	1	0	0	0	0
MXRA5	0	1	0	1	0	0	0	0	1	0	0	0	1	1	0	1	0	0	0	0	0	0	0	0	0	0	0	0	0	0	0	0	0	0	0	0	0	1	0	0	0	0	0	0	1	0	0	0	0
PRKX	0	1	0	1	0	0	1	1	0	0	0	1	0	1	0	0	0	1	0	1	1	0	0	0	1	0	1	0	1	0	0	1	1	0	0	1	0	1	0	1	1	0	1	0	1	0	0	0	0
NLGN4X	0	1	0	0	0	0	0	0	1	0	0	0	1	0	1	0	1	0	0	0	0	0	1	0	0	0	0	0	0	0	0	0	0	0	0	0	0	1	0	0	0	0	0	0	1	0	0	0	0
STS	0	1	0	1	0	1	0	1	0	0	0	1	0	1	0	0	1	0	0	0	0	1	1	1	1	1	0	0	1	0	0	0	1	0	1	0	0	1	0	1	1	0	0	0	1	0	0	0	0
PNPLA4	0	1	0	1	0	0	0	1	0	0	0	1	0	1	0	0	0	1	0	0	0	0	1	0	0	0	0	0	0	1	1	1	0	0	0	1	0	1	0	0	1	0	0	0	1	0	0	0	0
FAM9B	0	1	0	1	0	0	0	0	0	0	0	0	0	0	1	0	0	0	0	0	0	0	0	0	0	0	0	0	0	0	0	0	0	0	0	0	0	0	0	0	0	0	0	0	0	0	0	0	0
TBL1X	0	1	0	1	0	0	1	0	0	0	0	0	0	0	1	1	0	0	1	0	0	0	0	0	0	0	0	0	0	0	0	0	0	0	0	0	0	0	1	1	0	0	0	0	0	0	0	0	0
GPR143	0	1	0	1	0	0	0	0	0	0	0	0	0	0	1	0	0	0	0	0	0	0	0	0	0	0	0	0	0	0	0	0	0	0	0	0	0	0	1	0	0	0	0	0	1	0	0	0	0
SHROOM2	0	1	0	0	0	0	0	0	0	1	0	0	1	0	1	0	0	0	0	0	0	0	0	0	0	0	0	0	0	0	0	0	0	0	0	0	1	0	0	0	0	0	0	0	0	1	0	0	0
WWC3	0	1	0	0	0	0	0	0	0	0	0	0	0	0	0	1	0	0	1	0	0	0	0	0	0	0	0	0	0	0	0	0	0	0	0	0	1	0	0	0	0	0	0	0	0	1	0	0	0
CLCN4	0	1	0	0	1	0	0	0	0	0	0	0	0	0	0	0	0	0	0	0	0	0	0	0	0	0	0	0	0	0	0	0	0	0	0	0	0	0	1	0	0	0	0	0	0	1	0	0	0
MID1	0	1	0	0	0	0	0	0	0	0	0	0	1	0	0	1	0	0	0	0	0	0	0	0	0	0	0	0	0	0	0	0	0	0	0	0	0	1	0	0	0	0	0	0	1	0	0	0	0
HCCS	0	1	0	0	0	0	0	0	0	0	0	0	0	0	0	0	0	0	0	0	0	0	0	0	0	0	0	0	0	0	0	0	0	0	0	0	0	0	1	0	0	0	1	0	0	0	0	0	0
ARHGAP6	0	1	0	0	0	0	0	0	0	0	0	0	0	0	0	1	0	0	0	0	0	0	0	0	0	0	0	0	0	0	0	0	0	0	0	0	1	0	0	0	0	0	0	0	0	1	0	0	0
MSL3	0	1	0	0	1	0	1	0	0	0	1	1	0	1	0	0	0	0	0	1	0	0	0	0	0	0	0	0	0	0	0	0	0	0	0	0	0	0	0	0	0	0	0	0	1	0	0	0	0
FRMPD4	0	1	0	0	0	0	0	0	0	0	1	0	1	0	0	0	0	0	0	0	0	0	0	0	0	0	0	0	0	0	0	0	0	0	0	0	0	1	0	0	0	0	0	0	0	0	0	0	0
PRPS2	0	1	0	0	0	0	0	0	0	0	0	0	0	0	0	0	0	0	1	0	0	0	0	0	0	0	0	0	0	0	0	0	0	0	0	0	1	0	0	0	0	0	0	0	0	1	0	0	0
TMSB4X	0	1	0	0	0	0	0	0	0	0	0	0	0	0	0	1	0	0	0	0	0	0	0	0	0	0	0	0	0	0	0	0	0	0	0	0	1	0	0	0	0	0	0	0	0	1	0	0	0
FAM9C	0	1	0	1	0	0	0	1	0	0	0	1	0	1	0	0	0	0	0	0	0	0	0	0	0	0	0	0	0	0	0	0	0	0	0	0	0	0	0	0	0	0	0	0	1	0	0	0	0
EGFL6	0	1	0	0	0	0	0	0	0	0	0	0	0	0	0	0	0	0	0	0	0	0	0	0	0	0	0	0	0	0	0	0	0	0	0	0	0	1	0	0	0	0	0	0	1	0	0	0	0
TCEANC	0	1	0	1	0	0	0	0	1	0	0	0	1	1	0	0	1	0	0	0	0	0	0	1	0	0	0	0	0	0	0	0	0	0	0	0	0	1	0	0	0	0	0	0	1	0	0	0	0
RAB9A	0	1	0	1	0	0	0	0	1	0	0	0	1	1	0	0	0	0	0	0	0	0	0	0	0	0	0	0	0	0	0	0	0	0	0	0	0	0	1	0	0	0	0	0	1	0	0	0	0
TRAPPC2	0	1	0	1	0	1	0	0	1	0	0	0	1	1	0	0	0	1	1	0	0	0	0	0	0	1	0	0	0	0	1	0	1	0	0	0	0	1	0	1	1	0	0	0	1	0	0	0	0
OFD1	0	1	0	1	0	0	0	0	1	0	0	0	1	1	0	0	0	1	1	0	0	0	0	0	0	0	0	0	1	0	0	0	0	0	0	0	0	1	0	0	1	0	0	0	1	0	0	0	0
GPM6B	0	1	0	1	0	0	0	0	1	0	0	0	1	1	0	0	0	1	0	0	0	1	1	1	0	0	0	0	0	1	0	0	0	0	0	0	0	0	1	0	0	0	0	0	1	0	0	0	0
GEMIN8	0	1	0	1	0	1	0	0	1	0	0	0	1	1	0	0	0	0	0	0	0	0	0	0	0	0	0	0	0	0	0	0	0	0	0	0	0	1	0	0	1	0	0	0	1	0	0	0	0
FANCB	0	1	0	0	0	0	0	0	0	0	0	0	0	0	0	0	0	0	0	0	0	0	0	0	0	0	0	0	0	0	0	0	0	0	0	0	1	0	0	0	0	0	0	0	0	1	0	0	0
ASB11	0	1	0	0	1	0	0	0	0	0	0	0	1	0	1	0	0	0	0	0	0	0	0	0	0	0	0	0	0	0	0	0	0	0	0	0	0	0	0	0	0	0	0	0	0	0	0	0	0
PIR	0	1	0	1	0	1	0	0	0	0	1	0	0	0	1	1	0	0	1	0	0	0	0	0	0	0	0	0	0	0	0	0	0	0	0	0	0	1	0	0	0	0	0	0	1	0	0	0	0
BMX	0	1	0	0	0	0	0	0	0	0	0	0	1	0	1	0	0	0	0	0	0	0	0	0	0	0	0	0	0	0	0	0	0	0	0	0	0	0	0	0	0	0	0	0	0	1	0	0	0
ACE2	0	1	0	0	0	0	0	1	0	0	0	1	0	1	0	0	0	0	0	0	0	0	0	0	0	0	0	0	0	0	0	0	0	0	0	0	1	0	0	0	0	0	0	0	0	1	0	0	0
CA5BP1	0	1	0	1	0	0	0	1	0	0	0	0	0	0	0	0	0	0	0	0	0	0	0	0	0	0	0	0	0	0	0	0	0	0	0	0	0	0	0	0	0	0	0	0	1	0	0	1	0
CA5B	0	1	0	0	0	0	0	0	1	0	0	1	0	1	0	0	0	1	0	0	0	0	0	1	1	0	0	0	0	0	0	0	0	0	0	0	0	1	0	1	1	0	0	0	1	0	0	1	0
ZRSR2	0	1	0	0	0	0	0	1	0	0	0	1	0	1	0	0	0	1	0	0	1	1	1	1	1	1	1	1	1	0	1	1	1	1	1	0	0	1	0	1	1	0	0	0	1	0	0	1	0
AP1S2	0	1	0	1	0	0	0	0	1	0	0	0	1	1	0	1	0	0	0	1	0	0	0	0	0	0	0	0	0	0	0	0	0	0	0	0	0	0	1	0	0	0	0	0	1	0	0	0	0
GRPR	0	1	0	0	1	0	0	0	0	1	0	0	1	0	1	0	0	0	0	0	0	0	0	0	0	0	0	0	0	0	0	0	0	0	0	0	0	0	0	0	0	0	0	0	0	1	0	0	0
CTPS2	0	1	0	1	0	1	0	0	1	0	0	0	0	0	1	0	0	0	0	0	0	0	0	0	0	0	0	0	0	0	0	0	0	0	0	0	0	1	0	0	0	0	0	0	1	0	0	0	0
S100G	0	1	0	1	0	0	0	1	0	0	0	0	0	0	0	0	0	0	0	0	0	0	0	0	0	0	0	0	0	0	0	0	0	0	0	0	0	0	0	0	0	0	0	0	0	0	0	0	0
SYAP1	0	1	0	1	0	0	0	1	0	0	0	1	0	1	0	0	0	0	0	0	0	0	0	0	0	0	0	0	0	0	0	0	0	0	0	0	0	1	0	1	1	0	0	0	1	0	0	1	0
TXLNG	0	1	0	1	0	1	0	1	0	0	0	0	0	1	0	0	0	0	0	1	0	0	0	0	0	0	0	0	0	0	0	0	0	0	0	0	0	1	0	1	1	0	0	0	1	0	0	0	0
RBBP7	0	1	0	1	0	0	0	0	1	0	0	0	0	0	1	1	0	0	0	1	0	0	0	1	0	0	0	0	0	0	0	0	0	0	0	0	0	1	0	0	0	0	0	0	0	1	0	0	0
REPS2	0	1	0	0	0	0	0	0	0	0	1	0	1	0	0	1	0	0	0	0	0	0	0	0	0	0	0	0	0	0	0	0	0	0	0	0	0	0	1	0	0	0	0	0	0	1	0	0	0
NHS	0	1	0	0	1	0	0	0	0	1	0	0	1	0	1	0	0	0	0	0	0	0	0	0	0	0	0	0	0	0	0	0	0	0	0	0	0	0	0	0	0	0	0	0	0	1	0	0	0
SCML1	0	1	0	0	0	0	0	0	0	0	0	0	0	0	0	0	0	0	0	0	0	0	0	0	0	0	0	0	0	0	0	0	0	0	0	0	1	0	0	0	0	0	0	0	0	1	0	0	0
RAI2	0	1	0	0	0	0	0	0	0	0	0	0	0	0	0	0	0	0	0	0	0	0	0	0	0	0	0	0	0	0	0	0	0	0	0	0	1	0	0	0	0	0	0	0	0	1	0	0	0
BEND2	0	1	0	0	0	0	0	0	0	0	0	0	1	0	1	0	0	0	0	0	0	0	0	0	0	0	0	0	0	0	0	0	0	0	0	0	0	1	0	0	0	0	0	0	1	0	0	0	0
SCML2	0	1	0	0	0	0	0	0	0	0	0	0	1	0	0	0	0	0	1	0	0	0	0	0	0	0	0	0	0	0	0	0	0	0	0	0	0	0	1	0	0	0	0	0	0	1	0	0	0
CDKL5	0	1	0	0	0	0	0	0	0	0	0	0	1	0	0	0	0	0	1	0	0	0	0	0	0	0	0	0	0	0	0	0	0	0	0	0	0	0	0	0	0	0	0	0	1	0	0	0	0
RS1	0	1	0	0	0	0	0	0	0	0	1	0	1	0	0	0	0	0	0	0	0	0	0	0	0	0	0	0	0	0	0	0	0	0	0	0	0	0	0	0	0	0	0	0	0	0	0	0	0
PPEF1	0	1	0	0	0	0	0	0	0	0	0	0	1	0	1	0	0	0	0	0	0	0	0	0	0	0	0	0	0	0	0	0	0	0	0	0	0	0	0	0	0	0	0	0	0	0	0	0	0
PHKA2	0	1	0	0	0	0	0	0	0	0	0	0	0	0	0	1	0	0	0	0	0	0	0	0	0	0	0	0	0	0	0	0	0	0	0	0	0	1	0	0	0	0	0	0	1	0	0	0	0
PDHA1	0	1	0	0	0	0	0	0	0	0	0	0	0	0	0	0	0	0	1	0	0	0	0	0	0	0	0	0	0	0	0	0	0	0	0	0	0	0	1	0	0	0	0	0	1	0	0	0	0
MAP3K15	0	1	0	0	0	0	0	0	0	0	0	0	1	0	1	0	0	0	0	0	0	0	0	0	0	0	0	0	0	0	0	0	0	0	0	0	0	0	0	0	0	0	0	0	0	0	0	0	0
SH3KBP1	0	1	0	0	1	0	1	0	0	0	0	0	0	0	0	0	0	0	1	0	0	0	0	0	0	0	0	0	0	0	0	0	0	0	0	0	0	1	0	0	0	0	0	0	1	0	0	0	0
MAP7D2	0	1	0	0	0	0	0	0	0	0	1	0	1	0	0	0	0	0	0	0	0	0	0	0	0	0	0	0	0	0	0	0	0	0	0	0	0	1	0	1	1	0	0	0	1	0	0	0	0
EIF1AX	0	1	0	1	0	1	0	1	0	0	0	0	1	1	0	0	0	0	0	1	0	0	0	0	0	0	0	0	0	0	0	0	0	0	0	0	0	1	0	1	1	0	0	0	1	0	0	1	0
RPS6KA3	0	1	0	0	0	0	0	0	0	0	0	0	0	0	0	1	0	0	0	0	0	0	0	0	0	0	0	0	0	0	0	0	0	0	0	0	1	0	0	0	0	0	1	0	0	0	0	0	0
CNKSR2	0	1	0	0	0	0	0	0	0	0	0	0	1	0	1	0	0	0	0	0	0	0	0	0	0	0	0	0	0	0	0	0	0	0	0	0	0	1	0	0	0	0	0	0	1	0	0	0	0
MBTPS2	0	1	0	0	0	0	0	0	0	0	0	0	0	0	0	0	0	0	0	0	0	0	0	0	0	0	0	0	0	0	0	0	0	0	0	0	0	0	1	0	0	0	0	0	0	1	0	0	0
SMS	0	1	0	0	0	0	0	0	0	0	0	0	0	0	0	1	0	0	0	0	0	0	0	0	0	0	0	0	0	0	0	0	0	0	0	0	0	0	0	0	0	0	0	0	1	0	0	0	0
PHEX	0	1	0	0	1	0	0	0	0	0	0	0	1	0	1	0	0	0	0	0	0	0	0	0	0	0	0	0	0	0	0	0	0	0	0	0	0	0	0	0	0	0	0	0	0	1	0	0	0
PTCHD1	0	1	0	0	0	0	0	0	0	0	1	1	0	0	1	1	0	0	0	0	0	0	0	0	0	0	0	0	0	0	0	0	0	0	0	0	0	0	0	0	0	0	0	0	1	0	0	0	0
PRDX4	0	1	0	0	0	0	0	0	0	0	0	0	0	0	0	0	0	0	0	0	0	0	0	0	0	0	0	0	0	0	0	0	0	0	0	0	0	1	0	0	0	0	0	0	1	0	0	0	0
ACOT9	0	1	0	0	0	0	0	0	0	0	0	0	0	0	0	1	0	0	1	0	0	0	0	0	0	0	0	0	0	0	0	0	0	0	0	0	0	0	0	0	0	0	0	0	0	1	0	0	0
SAT1	0	1	0	0	0	0	0	0	0	0	0	0	1	0	0	0	0	0	0	0	0	0	0	0	0	0	0	0	0	0	0	0	0	0	0	0	1	0	0	0	0	0	0	0	0	1	0	0	0
APOO	0	1	0	0	0	0	0	0	0	0	0	0	0	0	0	1	0	0	1	0	0	0	0	0	0	0	0	0	0	0	0	0	0	0	0	0	1	0	0	0	0	0	0	0	1	0	0	0	0
EIF2S3	0	1	0	1	0	1	0	1	0	0	0	1	0	1	0	0	1	0	0	1	0	1	1	1	0	1	0	0	1	0	0	0	0	0	0	0	0	1	0	1	1	0	0	0	1	0	0	0	0
ZFX	0	1	0	1	0	1	0	1	0	0	0	1	0	1	0	0	0	1	1	0	1	1	1	1	1	1	1	1	1	1	1	1	1	0	1	1	0	1	0	1	1	0	0	0	1	0	0	1	0
PDK3	0	1	0	0	0	0	0	0	0	0	0	0	0	0	0	0	0	0	1	0	0	0	0	0	0	0	0	0	0	0	0	0	0	0	0	0	1	0	0	0	0	0	0	0	0	1	0	0	0
PCYT1B	0	1	0	0	0	0	0	0	0	0	0	0	0	0	0	0	0	0	0	0	0	0	0	0	0	0	0	0	0	0	0	0	0	0	0	0	1	0	0	0	0	0	0	0	0	1	0	0	0
VENTXP1	0	1	0	0	0	0	0	1	0	0	0	1	0	0	0	0	0	0	0	0	0	0	0	0	0	0	0	0	0	0	0	0	0	0	0	0	0	0	0	0	0	0	0	0	0	0	0	0	0
IL1RAPL1	0	1	0	0	0	0	0	0	0	0	1	0	1	0	1	0	0	0	0	0	0	0	0	0	0	0	0	0	0	0	0	0	0	0	0	0	0	0	0	0	0	0	0	0	0	0	0	0	0
NR0B1	0	1	0	0	0	0	0	0	0	0	0	1	0	1	0	0	0	0	0	0	0	0	0	0	0	0	0	0	0	0	0	0	0	0	0	0	0	0	0	0	0	0	0	0	1	0	0	0	0
CXorf21	0	1	0	0	0	0	0	0	0	0	0	0	1	0	1	0	0	0	0	0	0	0	0	0	0	0	0	0	0	0	0	0	0	0	0	0	0	1	0	0	1	0	0	0	0	1	0	0	0
GK	0	1	0	0	0	0	0	0	0	0	0	0	0	0	0	0	0	0	0	0	0	0	0	0	0	0	0	0	0	0	0	0	0	0	0	0	0	0	0	1	0	0	0	0	1	0	0	0	0
DMD	0	1	0	0	0	0	0	0	0	0	0	0	0	0	0	1	0	0	0	0	0	0	0	0	0	0	0	0	0	0	0	0	0	0	0	0	0	1	0	0	0	0	0	0	1	0	0	0	0
TMEM47	0	1	0	0	0	0	0	0	0	0	0	0	0	0	0	1	0	0	0	0	0	0	0	0	0	0	0	0	0	0	0	0	0	0	0	0	0	0	0	0	0	0	0	0	0	1	0	0	0
PRRG1	0	1	0	0	0	0	0	0	0	0	0	0	1	0	0	0	0	0	0	0	0	0	0	0	0	0	0	0	0	0	0	0	0	0	0	0	0	1	0	0	0	0	0	0	1	0	0	0	0
LANCL3	0	1	0	0	0	0	0	0	0	0	0	1	0	0	1	0	0	0	0	0	0	0	0	0	0	0	0	0	0	0	0	0	0	0	0	0	0	0	0	0	0	0	0	0	1	0	0	0	0
XK	0	1	0	0	0	0	0	0	0	0	0	0	1	0	1	0	0	0	0	0	0	0	0	0	0	0	0	0	0	0	0	0	0	0	0	0	0	0	1	0	0	0	0	0	1	0	0	0	0
CYBB	0	1	0	0	0	0	0	0	0	0	0	0	0	0	0	1	0	0	1	0	0	0	0	0	0	0	0	0	0	0	0	0	0	0	0	0	0	0	0	1	0	0	0	0	0	0	0	1	0
DYNLT3	0	1	0	0	0	0	0	0	0	0	0	0	0	0	0	0	0	0	0	0	0	0	0	0	0	0	0	0	0	0	0	0	0	0	0	0	0	1	0	0	0	0	0	0	0	1	0	0	0
SYTL5	0	1	0	0	0	0	0	0	0	0	0	0	1	0	0	0	0	0	0	0	0	0	0	0	0	0	0	0	0	0	0	0	0	0	0	0	0	0	0	0	0	0	0	0	1	0	0	0	0
SRPX	0	1	0	0	0	0	0	0	0	0	0	0	1	0	1	0	0	0	0	0	0	0	0	0	0	0	0	0	0	0	0	0	0	0	0	0	0	1	0	0	0	0	0	0	1	0	0	0	0
RPGR	0	1	0	0	0	0	0	0	0	0	0	0	0	0	0	1	0	0	0	0	0	0	0	0	0	0	0	0	0	0	0	0	0	0	0	0	0	1	0	0	0	0	0	0	1	0	0	0	0
OTC	0	1	0	0	0	0	0	0	0	0	0	0	1	0	1	0	0	0	0	0	0	0	0	0	0	0	0	0	0	0	0	0	0	0	0	0	0	1	0	0	0	0	0	0	1	0	0	0	0
TSPAN7	0	1	0	0	0	0	0	0	0	0	0	0	1	0	0	0	0	0	0	0	0	0	0	0	0	0	0	0	0	0	0	0	0	0	0	0	0	0	0	0	0	0	0	0	1	0	0	0	0
MID1IP1	0	1	0	0	0	0	0	0	0	0	0	0	0	0	0	0	0	0	0	0	0	0	0	0	0	0	0	0	0	0	0	0	0	0	0	0	1	0	0	0	0	0	0	0	0	1	0	0	0
BCOR	0	1	0	0	0	0	1	0	0	0	0	0	0	0	0	0	0	0	0	0	0	0	0	0	0	0	0	0	0	0	0	0	0	0	0	0	0	0	0	0	0	0	0	0	1	0	0	0	0
ATP6AP2	0	1	0	0	0	0	0	0	0	0	0	0	0	0	0	1	0	0	0	1	0	0	0	0	0	0	0	0	0	0	0	0	0	0	0	0	0	1	0	0	0	0	0	0	1	0	0	0	0
CXorf38	0	1	0	1	0	0	0	1	0	0	0	1	0	1	0	0	0	0	0	1	0	0	0	0	0	0	0	0	0	0	0	0	0	0	0	0	0	1	0	1	0	0	0	0	1	0	0	0	0
MED14	0	1	0	1	0	1	0	0	0	0	0	0	1	1	0	1	0	0	1	0	0	0	0	0	0	0	0	0	0	0	0	0	0	0	0	0	0	1	0	1	0	0	0	0	1	0	0	0	0
USP9X	0	1	0	1	0	1	0	0	1	0	0	0	1	1	0	0	1	0	0	1	0	0	0	0	0	0	0	0	0	0	0	0	0	0	0	0	0	1	0	1	0	0	1	0	1	0	0	1	0
DDX3X	0	1	0	1	0	1	0	1	0	0	0	1	0	1	0	0	0	0	0	0	0	0	0	0	0	0	0	0	0	0	0	0	0	0	0	0	0	1	0	1	1	0	0	0	1	0	0	1	0
CASK	0	1	0	0	0	0	0	0	0	0	0	0	0	0	0	0	0	0	0	0	0	0	0	0	0	0	0	0	0	0	0	0	0	0	0	0	0	0	1	0	0	0	0	0	1	0	0	0	0
MAOA	0	1	0	1	0	0	0	0	0	0	0	0	1	1	0	1	0	0	0	0	0	0	0	0	0	0	0	0	0	0	0	0	0	0	0	0	0	0	1	0	0	0	0	0	0	1	0	0	0
MAOB	0	1	0	0	0	0	0	0	0	0	0	0	0	0	0	0	0	0	0	0	0	0	0	0	0	0	0	0	0	0	0	0	0	0	0	0	0	1	0	0	0	0	0	0	1	0	0	0	0
NDP	0	1	0	0	0	0	0	0	0	0	0	0	1	0	1	0	0	0	0	0	0	0	0	0	0	0	0	0	0	0	0	0	0	0	0	0	0	0	0	0	0	0	0	0	0	0	0	0	0
EFHC2	0	1	0	0	0	0	0	0	0	0	1	0	1	0	1	0	0	0	0	0	0	0	0	0	0	0	0	0	0	0	0	0	0	0	0	0	0	1	0	0	0	0	0	0	1	0	0	1	0
FUNDC1	0	1	0	1	0	0	0	1	0	0	0	1	0	1	0	0	0	0	0	0	0	0	0	0	0	0	0	0	0	0	0	0	0	0	0	0	0	1	0	0	0	0	0	0	1	0	0	1	0
KDM6A	0	1	0	1	0	0	0	0	1	0	0	0	1	1	0	0	0	0	0	1	0	0	0	0	0	0	0	0	0	0	0	0	0	0	0	0	0	1	0	1	1	0	0	0	1	0	0	0	0
ZNF674.AS1	0	1	0	0	0	0	0	0	0	0	0	0	0	0	0	0	0	0	1	0	0	0	0	0	0	0	0	0	0	0	0	0	0	0	0	0	0	1	0	0	0	0	0	0	0	0	0	0	0
CHST7	0	1	0	0	0	0	0	0	0	0	0	0	0	0	0	0	0	0	0	0	0	0	0	0	0	0	0	0	0	0	0	0	0	0	0	0	1	0	0	0	0	0	1	0	0	1	0	0	0
SLC9A7	0	1	0	0	0	0	0	0	0	0	0	0	0	0	0	0	0	0	0	0	0	0	0	0	0	0	0	0	0	0	0	0	0	0	0	0	0	0	1	0	0	0	0	0	1	0	0	0	0
RP2	0	1	0	0	0	0	0	0	0	0	0	0	0	0	0	0	0	0	1	0	0	0	0	0	0	0	0	0	0	0	0	0	0	0	0	0	1	0	0	0	0	0	0	0	0	0	0	0	0
RGN	0	1	0	0	0	0	0	0	0	0	0	0	1	0	0	0	0	0	0	0	0	0	0	0	0	0	0	0	0	0	0	0	0	0	0	0	0	0	0	0	0	0	0	0	0	1	0	0	0
UBA1	0	1	0	1	0	1	0	1	0	0	0	1	0	1	0	0	1	0	0	1	1	1	0	1	1	0	1	1	1	1	0	0	1	1	1	1	0	1	0	1	1	0	0	0	1	0	0	1	0
INE1	0	1	0	0	0	0	0	1	0	0	0	0	0	0	0	0	0	0	0	0	0	0	0	0	0	0	0	0	0	0	0	0	0	0	0	0	0	0	0	0	1	0	0	0	1	0	0	0	0
CDK16	0	1	0	1	0	1	0	0	1	0	0	0	1	1	0	1	0	0	1	0	0	0	0	0	0	0	0	0	0	0	0	0	1	0	0	0	0	1	0	0	0	0	0	0	1	0	0	0	0
USP11	0	1	0	0	1	0	0	0	0	0	1	0	0	0	0	0	1	0	1	0	0	0	0	0	0	0	0	0	0	1	0	0	0	0	0	0	0	0	1	0	0	0	0	0	1	0	0	0	0
ZNF157	0	1	0	0	0	0	0	0	0	0	1	1	0	0	1	0	0	0	0	0	0	0	0	0	0	0	0	0	0	0	0	0	0	0	0	0	0	0	0	0	0	0	0	0	1	0	0	0	0
ZNF41	0	1	0	0	0	0	0	0	0	0	0	0	0	0	0	0	0	0	1	0	0	0	0	0	0	0	0	0	0	0	0	0	0	0	0	0	1	0	0	0	0	0	0	0	0	1	0	0	0
TIMP1	0	1	0	0	1	0	0	0	0	0	0	0	0	0	1	0	1	0	1	0	0	0	0	0	0	0	0	0	0	0	0	0	0	0	0	0	1	0	0	0	0	0	0	0	0	1	0	0	0
CFP	0	1	0	0	0	0	0	0	0	0	0	0	0	0	0	1	0	0	0	0	0	0	0	0	0	0	0	0	0	0	0	0	0	0	0	0	0	1	0	0	0	0	0	0	0	0	0	0	0
ELK1	0	1	0	0	0	0	0	0	0	0	0	0	0	0	0	1	0	0	1	0	0	0	0	0	0	0	0	0	0	0	0	0	0	0	0	0	0	0	0	0	0	0	0	0	1	0	0	0	0
UXT	0	1	0	0	0	0	0	0	0	0	0	0	0	0	0	0	0	0	0	0	0	0	0	0	0	0	0	0	0	0	0	0	0	0	0	0	0	1	0	0	0	0	0	0	1	0	0	0	0
SLC38A5	0	1	0	0	0	0	0	0	0	0	0	0	0	0	0	0	0	0	1	0	0	0	0	0	0	0	0	0	0	0	0	0	0	0	0	0	0	0	1	0	0	0	1	0	0	0	0	0	0
FTSJ1	0	1	0	0	0	0	0	0	0	0	0	0	0	0	0	0	0	0	1	0	0	0	0	0	0	0	0	0	0	0	0	0	0	0	0	0	1	0	0	0	0	0	0	0	1	0	0	0	0
PORCN	0	1	0	0	0	0	0	0	0	0	0	0	1	0	0	0	0	0	1	0	0	0	0	0	0	0	0	0	0	0	0	0	0	0	0	0	0	1	0	0	0	0	0	0	0	0	0	0	0
EBP	0	1	0	0	0	0	0	0	0	0	0	0	0	0	0	0	0	0	1	0	0	0	0	0	0	0	0	0	0	0	0	0	0	0	0	0	0	0	1	0	0	0	0	0	0	0	0	0	0
TBC1D25	0	1	0	0	0	0	0	0	0	0	0	0	0	0	0	1	0	0	1	0	0	0	0	0	0	0	0	0	0	0	0	0	0	0	0	0	1	0	0	0	0	0	0	0	0	1	0	0	0
RBM3	0	1	0	0	0	0	0	0	0	0	0	1	0	0	1	1	0	0	1	0	0	0	0	0	0	0	0	0	0	0	0	0	0	0	0	0	0	0	0	1	0	0	0	0	1	0	0	0	0
WDR13	0	1	0	0	0	0	0	0	0	0	0	0	0	0	0	1	0	0	0	0	0	0	0	0	0	0	0	0	0	0	0	0	0	0	0	0	1	0	0	1	0	0	0	0	0	0	0	0	0
WAS	0	1	0	0	1	0	0	0	0	0	0	0	0	0	1	0	0	0	0	0	0	0	0	0	0	0	0	0	0	0	0	0	0	0	0	0	0	0	0	0	0	0	0	0	0	0	0	0	0
SUV39H1	0	1	0	0	0	0	0	0	0	0	0	0	0	0	0	0	0	0	0	0	0	0	0	0	0	0	0	0	0	0	0	0	0	0	0	0	0	1	0	0	0	0	0	0	1	0	0	0	0
HDAC6	0	1	0	0	0	0	0	0	0	0	0	0	0	0	0	0	0	0	0	0	0	0	0	0	0	0	0	0	0	0	0	0	0	0	0	0	0	0	0	0	0	0	1	0	1	0	0	0	0
PCSK1N	0	1	0	0	0	0	0	0	0	0	0	0	0	0	0	1	0	0	0	0	0	0	0	0	0	0	0	0	0	0	0	0	0	0	0	0	0	0	0	0	0	0	0	0	1	0	0	0	0
PQBP1	0	1	0	0	0	0	0	0	0	0	0	0	1	0	1	0	0	0	0	0	0	0	0	0	0	0	0	0	0	0	0	0	0	0	0	0	0	0	0	0	0	0	0	0	0	1	0	0	0
TIMM17B	0	1	0	0	0	0	0	0	0	0	0	0	0	0	0	1	0	0	0	0	0	0	0	0	0	0	0	0	0	0	0	0	0	0	0	0	0	0	0	0	0	0	0	0	1	0	0	0	0
SLC35A2	0	1	0	0	0	0	0	0	0	0	0	0	0	0	0	1	0	0	0	0	0	0	0	0	0	0	0	0	0	0	0	0	0	0	0	0	0	0	1	0	0	0	0	0	0	0	0	0	0
PIM2	0	1	0	0	0	0	0	0	0	0	0	0	0	0	0	0	0	0	0	0	0	0	0	0	0	0	0	0	0	0	0	0	0	0	0	0	0	0	0	1	0	0	0	0	0	0	0	1	0
GRIPAP1	0	1	0	0	0	0	0	0	0	0	0	0	0	0	0	1	0	0	1	0	0	0	0	0	0	0	0	0	0	0	0	0	0	0	0	0	1	0	0	0	0	0	0	0	0	1	0	0	0
TFE3	0	1	0	0	0	0	0	0	0	0	0	0	0	0	0	0	0	0	0	0	0	0	0	0	0	0	0	0	0	0	0	0	0	0	0	0	1	0	0	0	0	0	0	0	0	1	0	0	0
WDR45	0	1	0	0	0	0	0	0	0	0	0	0	0	0	0	0	0	0	0	0	0	0	0	0	0	0	0	0	0	0	0	0	0	0	0	0	1	0	0	0	0	0	0	0	0	1	0	0	0
GPKOW	0	1	0	0	0	0	0	0	0	0	0	0	0	0	0	0	0	0	1	0	0	0	0	0	0	0	0	0	0	0	0	0	0	0	0	0	0	0	0	0	0	0	0	0	0	1	0	0	0
CACNA1F	0	1	0	0	0	0	0	0	0	0	0	0	0	0	0	0	0	0	0	0	0	0	0	0	0	0	0	0	0	0	0	0	0	0	0	0	0	1	0	0	0	0	0	0	0	1	0	0	0
PPP1R3F	0	1	0	0	0	0	0	0	0	0	0	0	0	0	0	0	0	0	0	0	0	0	0	0	0	0	0	0	0	0	0	0	0	0	0	0	1	0	0	0	0	0	0	0	0	1	0	0	0
CCNB3	0	1	0	0	0	0	0	0	0	0	0	0	1	0	0	0	0	0	0	0	0	0	0	0	0	0	0	0	0	0	0	0	0	0	0	0	0	0	0	0	0	0	0	0	0	1	0	0	0
SHROOM4	0	1	0	0	0	0	0	0	0	0	0	0	0	0	0	0	0	0	0	0	0	0	0	0	0	0	0	0	0	0	0	0	0	0	0	0	0	0	0	0	0	0	0	0	0	0	0	1	0
NUDT10	0	1	0	0	0	0	0	0	0	0	0	0	0	0	0	1	0	0	0	0	0	0	0	0	0	0	0	0	0	0	0	0	0	0	0	0	0	0	0	0	0	0	0	0	1	0	0	0	0
NUDT11	0	1	0	0	0	0	0	0	0	0	0	0	0	0	0	0	0	0	0	0	0	0	0	0	0	0	0	0	0	0	0	0	0	0	0	0	0	1	0	0	0	0	0	0	1	0	0	0	0
GSPT2	0	1	0	0	0	0	0	0	0	0	0	0	0	0	0	1	0	0	1	0	0	0	0	0	0	0	0	0	0	0	0	0	0	0	0	0	0	1	0	0	0	0	0	0	0	0	0	0	0
MAGED1	0	1	0	0	0	0	0	0	0	0	0	0	0	0	0	1	0	0	1	0	0	0	0	0	0	0	0	0	0	0	0	0	0	0	0	0	0	0	0	0	0	0	0	0	1	0	0	0	0
GPR173	0	1	0	0	0	0	0	0	0	0	0	0	1	0	0	0	0	0	0	0	0	0	0	0	0	0	0	0	0	0	0	0	0	0	0	0	0	1	0	0	0	0	0	0	1	0	0	0	0
KDM5C	0	1	0	1	0	0	0	0	1	0	0	0	1	1	0	0	0	0	0	1	0	0	0	0	0	0	0	0	0	0	0	0	0	0	0	0	0	1	0	1	1	0	0	0	1	0	0	0	0
KDM5C.IT1	0	1	0	0	0	0	0	0	0	0	0	0	0	0	0	0	0	0	0	0	0	0	0	0	0	0	0	0	0	0	0	0	0	0	0	0	0	0	0	0	1	0	0	0	1	0	0	0	0
IQSEC2	0	1	0	1	0	0	0	0	1	0	0	0	1	1	0	0	0	0	0	0	0	0	0	0	0	0	0	0	0	0	0	0	0	0	0	0	0	0	1	0	0	0	0	0	0	1	0	0	0
SMC1A	0	1	0	1	0	0	1	0	1	0	0	0	1	1	0	0	0	1	0	0	0	0	0	0	0	0	0	0	0	0	0	0	0	0	0	0	0	1	0	1	1	0	0	0	1	0	0	1	0
RIBC1	0	1	0	1	0	0	0	0	0	0	1	0	1	1	0	1	0	0	0	0	0	0	0	0	0	0	0	0	0	0	0	0	0	0	0	0	0	1	0	0	0	0	0	0	1	0	0	0	0
HSD17B10	0	1	0	0	0	0	0	0	0	0	0	0	0	0	0	0	0	0	0	0	0	0	0	0	0	0	0	0	0	0	0	0	0	0	0	0	0	0	1	0	0	0	0	0	1	0	0	0	0
HUWE1	0	1	0	0	0	0	0	0	0	0	0	0	0	0	0	1	0	0	1	0	0	0	0	0	0	0	0	0	0	0	0	0	0	0	0	0	0	0	0	0	0	0	0	0	0	0	0	0	0
PHF8	0	1	0	0	0	0	0	0	0	0	0	0	0	0	0	0	0	0	0	1	0	0	0	0	0	0	0	0	0	0	0	0	0	0	0	0	0	0	0	0	0	0	1	0	0	1	0	0	0
FAM120C	0	1	0	0	0	0	0	0	0	0	0	0	0	0	0	0	0	0	0	0	0	0	0	0	0	0	0	0	0	0	0	0	0	0	0	0	1	0	0	0	0	0	0	0	0	1	0	0	0
WNK3	0	1	0	0	0	0	0	0	0	0	0	0	1	0	0	0	0	0	0	0	0	0	0	0	0	0	0	0	0	0	0	0	0	0	0	0	1	0	0	0	0	0	0	0	0	1	0	0	0
TSR2	0	1	0	0	0	0	0	0	0	0	0	0	0	0	0	1	0	0	1	0	0	0	0	0	0	0	0	0	0	0	0	0	0	0	0	0	0	0	0	0	0	0	0	0	0	0	0	0	0
FGD1	0	1	0	0	0	0	0	0	0	0	0	0	0	0	0	0	0	0	0	0	0	0	0	0	0	0	0	0	0	0	0	0	0	0	0	0	1	0	0	0	0	0	0	0	0	1	0	0	0
MAGED2	0	1	0	0	0	0	0	0	0	0	0	0	0	0	0	0	0	0	1	0	0	0	0	0	0	0	0	0	0	0	0	0	0	0	0	0	0	0	1	0	0	0	0	0	0	0	0	0	0
PFKFB1	0	1	0	0	0	0	0	0	0	0	1	0	1	0	0	0	0	0	0	0	0	0	0	0	0	0	0	0	0	0	0	0	0	0	0	0	0	1	0	0	0	0	0	0	1	0	0	0	0
FAM104B	0	1	0	0	0	0	0	0	0	0	0	0	0	0	0	0	0	0	1	0	0	0	0	0	0	0	0	0	0	0	0	0	0	0	0	0	1	0	0	0	0	0	0	0	0	0	0	0	0
MAGEH1	0	1	0	0	0	0	0	0	0	0	0	0	0	0	0	0	0	0	0	0	0	0	0	0	0	0	0	0	0	0	0	0	0	0	0	0	0	1	0	0	0	0	0	0	1	0	0	0	0
KLF8	0	1	0	0	0	0	0	0	0	0	0	0	0	0	0	1	0	0	1	0	0	0	0	0	0	0	0	0	0	0	0	0	0	0	0	0	0	0	1	0	0	0	0	0	0	1	0	0	0
UBQLN2	0	1	0	0	0	0	0	0	0	0	0	0	0	0	0	0	0	0	0	0	0	0	0	0	0	0	0	0	0	0	0	0	0	0	0	0	1	0	0	0	0	0	0	0	0	1	0	0	0
SPIN2B	0	1	0	0	0	0	0	0	0	0	0	0	0	0	0	1	0	0	1	0	0	0	0	0	0	0	0	0	0	0	0	0	0	0	0	0	0	1	0	0	0	0	0	0	1	0	0	0	0
FAAH2	0	1	0	0	0	0	0	0	0	0	0	0	0	0	0	1	0	0	0	0	0	0	0	0	0	0	0	0	0	0	0	0	0	0	0	0	0	0	0	0	0	0	0	0	1	0	0	0	0
ZXDB	0	1	0	0	0	0	0	0	0	0	0	0	0	0	0	1	0	0	0	0	0	0	0	0	0	0	0	0	0	0	0	0	0	0	0	0	0	0	1	0	0	0	0	0	0	1	0	0	0
ASB12	0	1	0	0	0	0	0	0	0	0	0	0	0	0	0	0	0	0	0	0	0	0	0	0	0	0	0	0	0	0	0	0	0	0	0	0	1	0	0	0	0	0	1	0	1	0	0	0	0
ZC4H2	0	1	0	0	0	0	0	0	0	0	0	0	0	0	0	1	0	0	1	0	0	0	0	0	0	0	0	0	0	0	0	0	0	0	0	0	0	1	0	0	0	0	0	0	1	0	0	1	0
ZC3H12B	0	1	0	0	0	0	0	0	0	0	1	0	1	0	0	0	0	0	0	0	0	0	0	0	0	0	0	0	0	0	0	0	0	0	0	0	0	1	0	0	0	0	0	0	1	0	0	0	0
LAS1L	0	1	0	0	0	0	0	0	0	0	0	0	0	0	0	0	0	0	0	0	0	0	0	0	0	0	0	0	0	0	0	0	0	0	0	0	0	1	0	0	0	0	0	0	1	0	0	0	0
MSN	0	1	0	0	1	0	0	0	0	0	0	0	0	0	0	0	0	0	0	0	0	0	0	0	0	0	0	0	0	0	0	0	0	0	0	0	0	1	0	0	0	0	0	0	0	1	0	0	0
VSIG4	0	1	0	0	0	0	0	0	0	0	0	0	1	0	1	0	0	0	0	0	0	0	0	0	0	0	0	0	0	0	0	0	0	0	0	0	0	1	0	1	0	0	0	0	0	0	0	0	0
HEPH	0	1	0	0	0	0	0	0	0	0	0	0	0	0	0	0	0	0	0	0	0	0	0	0	0	0	0	0	0	0	0	0	0	0	0	0	0	0	1	0	0	0	1	0	1	0	0	0	0
EDA2R	0	1	0	0	1	0	1	0	0	0	1	0	0	0	0	0	0	0	0	0	0	0	0	0	0	0	0	0	0	0	0	0	0	0	0	0	0	0	1	0	0	0	1	0	0	1	0	0	0
AR	0	1	0	0	0	0	0	0	0	0	0	0	0	0	0	0	0	0	0	0	0	0	0	0	0	0	0	0	0	0	0	0	0	0	0	0	0	0	1	0	0	0	0	0	1	0	0	0	0
OPHN1	0	1	0	0	0	0	0	0	0	0	0	0	0	0	0	1	0	0	0	0	0	0	0	0	0	0	0	0	0	0	0	0	0	0	0	0	0	1	0	0	0	0	0	0	1	0	0	0	0
YIPF6	0	1	0	0	0	0	0	0	0	0	0	0	0	0	0	0	0	0	0	0	0	0	0	0	0	0	0	0	0	0	0	0	0	0	0	0	0	1	0	0	0	0	0	0	1	0	0	0	0
STARD8	0	1	0	0	0	0	0	0	0	0	0	0	0	0	0	1	0	0	1	0	0	0	0	0	0	0	0	0	0	0	0	0	0	0	0	0	0	1	0	0	0	0	1	0	0	0	0	0	0
EFNB1	0	1	0	0	0	0	0	0	0	0	0	0	1	0	0	0	0	0	0	0	0	0	0	0	0	0	0	0	0	0	0	0	0	0	0	0	0	0	0	0	0	0	0	0	0	1	0	0	0
PJA1	0	1	0	0	0	0	0	0	0	0	0	0	0	0	0	0	0	0	1	0	0	0	0	0	0	0	0	0	0	0	0	0	0	0	0	0	0	1	0	0	0	0	0	0	0	1	0	0	0
FAM155B	0	1	0	0	0	0	0	0	0	0	0	0	0	0	0	1	0	0	0	0	0	0	0	0	0	0	0	0	0	0	0	0	0	0	0	0	1	0	0	0	0	1	0	0	0	1	0	0	0
EDA	0	1	0	0	0	0	0	0	0	0	0	0	1	0	0	0	0	0	0	0	0	0	0	0	0	0	0	0	0	0	0	0	0	0	0	0	0	0	1	0	0	0	0	0	1	0	0	0	0
IGBP1	0	1	0	0	0	0	0	0	0	0	0	0	0	0	0	0	0	0	1	0	0	0	0	0	0	0	0	0	0	0	0	0	0	0	0	0	0	0	0	0	0	0	0	0	1	0	0	0	0
DGAT2L6	0	1	0	0	0	0	0	0	0	0	0	0	1	0	1	0	0	0	0	0	0	0	0	0	0	0	0	0	0	0	0	0	0	0	0	0	0	0	0	0	0	0	0	0	0	0	0	0	0
PDZD11	0	1	0	0	0	0	0	0	0	0	0	0	0	0	0	0	0	0	0	0	0	0	0	0	0	0	0	0	0	0	0	0	0	0	0	0	1	0	0	0	0	0	0	0	0	1	0	0	0
KIF4A	0	1	0	0	0	0	0	0	0	0	0	0	0	0	0	0	0	0	1	0	0	0	0	0	0	0	0	0	0	0	0	0	0	0	0	0	0	0	0	0	0	0	0	0	0	0	0	0	0
DLG3	0	1	0	0	0	0	0	0	0	0	0	0	0	0	0	1	0	0	0	0	0	0	0	0	0	0	0	0	0	0	0	0	0	0	0	0	0	0	1	0	0	0	0	0	1	0	0	0	0
SNX12	0	1	0	0	0	0	0	0	0	0	0	0	0	0	0	1	0	0	1	0	0	0	0	0	0	0	0	0	0	0	0	0	0	0	0	0	1	0	0	0	0	0	0	0	1	0	0	0	0
FOXO4	0	1	0	0	1	0	0	0	0	0	0	0	0	0	1	0	0	0	0	0	0	0	0	0	0	0	0	0	0	0	0	0	0	0	0	0	1	0	0	1	0	0	0	0	0	0	0	0	0
CXorf65	0	1	0	0	0	0	0	0	0	0	0	0	1	0	1	0	0	0	0	0	0	0	0	0	0	0	0	0	0	0	0	0	0	0	0	0	0	0	0	0	0	0	0	0	1	0	0	0	0
IL2RG	0	1	0	0	0	0	0	0	0	0	0	0	0	0	0	0	0	0	0	0	0	0	0	0	0	0	0	0	0	0	0	0	0	0	0	0	0	0	0	1	0	0	1	0	1	0	0	0	0
MED12	0	1	0	0	0	0	0	0	0	0	0	0	0	0	0	1	0	0	0	0	0	0	0	0	0	0	0	0	0	0	0	0	0	0	0	0	0	0	0	0	0	0	0	0	1	0	0	0	0
NLGN3	0	1	0	0	0	0	0	0	0	0	0	0	0	0	0	0	0	0	0	0	0	0	0	0	0	0	0	0	0	0	0	0	0	0	0	0	0	1	0	0	0	0	0	0	0	1	0	0	0
ZMYM3	0	1	0	0	0	0	0	0	0	0	0	0	0	0	0	0	0	0	0	0	0	0	0	0	0	0	0	0	0	0	0	0	0	0	0	0	1	0	0	0	0	0	0	0	0	1	0	0	0
NONO	0	1	0	0	0	0	0	0	0	0	0	0	0	0	0	1	0	0	0	0	0	0	0	0	0	0	0	0	0	0	0	0	0	0	0	0	0	0	0	0	0	0	0	0	0	1	0	0	0
TAF1	0	1	0	0	0	0	0	0	0	0	0	0	0	0	0	1	0	0	0	0	0	0	0	0	0	0	0	0	0	0	0	0	0	0	0	0	0	1	0	0	0	0	0	0	0	1	0	0	0
OGT	0	1	0	0	0	0	0	0	0	0	0	0	0	0	0	0	0	0	1	0	0	0	0	0	0	0	0	0	0	0	0	0	0	0	0	0	0	1	0	0	0	0	0	0	0	0	0	0	0
CXCR3	0	1	0	0	0	0	0	0	0	0	0	0	0	0	0	0	0	0	0	0	0	0	0	0	0	0	0	0	0	0	0	0	0	0	0	0	0	0	0	0	0	1	0	0	1	0	0	0	0
NHSL2	0	1	0	0	0	0	0	0	0	0	1	0	1	0	1	0	0	0	0	0	0	0	0	0	0	0	0	0	0	0	0	0	0	0	0	0	0	1	0	0	0	0	0	0	1	0	0	0	0
PIN4	0	1	0	0	1	0	1	0	0	0	1	0	0	0	0	0	0	0	1	0	0	0	0	0	0	0	0	0	0	0	0	0	0	0	0	0	0	1	0	0	0	0	0	0	1	0	0	0	0
ERCC6L	0	1	0	0	0	0	0	0	0	0	0	0	0	0	0	0	0	0	1	0	0	0	0	0	0	0	0	0	0	0	0	0	0	0	0	0	0	1	0	0	1	0	0	0	1	0	0	1	0
RPS4X	0	1	0	1	0	0	0	0	1	0	0	1	0	1	0	0	1	0	0	0	1	0	1	1	1	1	0	0	1	1	1	1	1	0	1	0	0	1	0	1	1	0	0	0	1	0	0	1	0
CITED1	0	1	0	0	0	0	0	0	0	0	1	0	0	0	0	0	0	0	0	0	0	0	0	0	0	0	0	0	0	0	0	0	0	0	0	0	0	0	0	0	0	0	0	0	0	1	0	0	0
HDAC8	0	1	0	0	0	0	0	0	0	0	0	0	0	0	0	0	0	0	1	0	0	0	0	0	0	0	0	0	0	0	0	0	0	0	0	0	0	0	0	0	0	0	0	0	1	0	0	0	0
PHKA1	0	1	0	0	0	0	0	0	0	0	0	0	1	0	0	0	0	0	0	0	0	0	0	0	0	0	0	0	0	0	0	0	0	0	0	0	0	0	1	0	0	0	0	0	1	0	0	0	0
NAP1L2	0	1	0	0	0	0	0	0	0	0	0	0	0	0	0	1	0	0	0	0	0	0	0	0	0	0	0	0	0	0	0	0	0	0	0	0	0	1	0	0	0	0	0	0	1	0	0	0	0
CHIC1	0	1	0	0	0	0	0	0	0	0	0	0	0	0	0	0	0	0	0	0	0	0	0	0	0	0	0	0	0	0	0	0	0	0	0	0	1	0	0	0	0	0	0	0	0	1	0	0	0
TSIX	0	1	0	0	0	0	0	0	0	0	0	0	0	0	0	0	0	0	0	0	0	0	0	0	0	0	0	0	0	0	0	0	0	0	0	0	0	0	0	1	0	0	0	0	1	0	0	0	0
XIST	0	1	0	1	0	1	0	0	0	0	0	0	0	1	0	1	0	0	0	1	1	1	1	1	1	1	1	1	1	1	1	1	1	1	1	1	0	1	0	1	1	0	0	0	1	0	0	1	0
FTX	0	1	0	0	0	0	0	0	0	0	0	0	0	0	0	0	0	0	0	1	0	0	0	0	0	0	0	0	0	0	0	0	0	0	0	0	0	0	0	0	0	0	0	0	1	0	0	0	0
JPX	0	1	0	1	0	0	0	1	0	0	0	0	0	1	0	0	0	0	0	1	0	0	0	0	0	0	0	0	0	0	0	0	0	0	0	0	0	1	0	0	1	0	0	0	1	0	0	0	0
SLC16A2	0	1	0	0	0	0	0	0	0	0	0	0	1	0	0	0	0	0	0	0	0	0	0	0	0	0	0	0	0	0	0	0	0	0	0	0	0	1	0	0	0	0	0	0	1	0	0	0	0
ABCB7	0	1	0	0	0	0	1	0	0	0	0	0	0	0	0	0	0	0	1	0	0	0	0	0	0	0	0	0	0	0	0	0	0	0	0	0	0	0	0	0	0	0	0	0	1	0	0	0	0
UPRT	0	1	0	0	0	0	0	0	0	0	0	0	0	0	0	0	0	0	1	0	0	0	0	0	0	0	0	0	0	0	0	0	0	0	0	0	0	0	0	0	0	0	0	0	1	0	0	0	0
MAGEE1	0	1	0	0	1	0	0	0	0	0	1	0	0	0	1	0	0	0	0	0	0	0	0	0	0	0	0	0	0	0	0	0	0	0	0	0	0	1	0	0	0	0	0	0	1	0	0	0	0
ATRX	0	1	0	0	0	0	0	0	0	0	0	0	0	0	0	1	0	0	1	0	0	0	0	0	0	0	0	0	0	0	0	0	0	0	0	0	1	0	0	0	0	0	0	0	0	0	0	0	0
COX7B	0	1	0	0	1	0	0	0	0	0	0	0	0	0	1	0	0	0	0	0	0	0	0	0	0	0	0	0	0	0	0	0	0	0	0	0	0	0	1	0	0	0	0	0	1	0	0	0	0
ATP7A	0	1	0	0	1	0	1	0	0	0	0	0	0	0	1	0	0	0	1	0	0	0	0	0	0	0	0	0	0	0	0	0	0	0	0	0	0	0	1	0	0	0	0	0	0	1	0	0	0
PGK1	0	1	0	0	0	0	0	0	0	0	0	0	0	0	0	0	0	0	0	0	0	0	0	0	0	0	0	0	0	0	0	0	0	0	0	0	1	0	0	0	0	0	1	0	1	0	0	0	0
CYSLTR1	0	1	0	0	0	0	0	0	0	0	0	0	0	0	0	0	0	0	1	0	0	0	0	0	0	0	0	0	0	0	0	0	0	0	0	0	0	0	0	0	0	0	0	0	1	0	0	0	0
P2RY10	0	1	0	0	0	0	0	0	0	0	0	0	1	0	1	0	0	0	0	0	0	0	0	0	0	0	0	0	0	0	0	0	0	0	0	0	0	0	0	0	0	0	0	0	1	0	0	0	0
GPR174	0	1	0	0	0	0	0	0	0	0	0	0	1	0	1	0	0	0	0	1	0	0	0	0	0	0	0	0	0	0	0	0	0	0	0	0	0	0	0	1	0	0	1	0	0	0	0	0	0
ITM2A	0	1	0	0	1	0	0	0	0	0	1	0	0	0	0	0	0	0	0	0	0	0	0	0	0	0	0	0	0	0	0	0	0	0	0	0	0	0	0	0	0	0	0	0	1	0	0	0	0
BRWD3	0	1	0	0	0	0	0	0	0	0	0	0	0	0	0	0	0	0	0	0	0	0	0	0	0	0	0	0	0	0	0	0	0	0	0	0	0	1	0	0	0	0	0	0	0	0	0	0	0
HMGN5	0	1	0	0	0	0	0	0	0	0	1	0	1	0	1	0	0	0	0	0	0	0	0	0	0	0	0	0	0	0	0	0	0	0	0	0	0	0	0	0	0	0	0	0	1	0	0	0	0
SH3BGRL	0	1	0	1	0	1	0	0	0	0	0	0	0	0	1	0	0	0	0	0	0	0	0	0	0	0	0	0	0	0	0	0	0	0	0	0	1	0	0	0	0	0	0	0	0	0	0	0	0
ZNF711	0	1	0	0	0	0	0	0	0	0	1	0	1	0	1	0	0	0	1	0	0	0	0	0	0	0	0	0	0	0	0	0	0	0	0	0	0	0	1	0	0	0	0	0	1	0	0	0	0
POF1B	0	1	0	0	0	0	0	0	0	0	0	0	1	0	1	1	0	0	0	0	0	0	0	0	0	0	0	0	0	0	0	0	0	0	0	0	0	1	0	0	0	0	0	0	1	0	0	0	0
CHM	0	1	0	0	1	0	0	0	0	0	1	0	0	0	0	0	0	0	0	1	0	0	0	0	0	0	0	0	0	0	0	0	0	0	0	0	0	1	0	0	0	0	0	0	1	0	0	0	0
DACH2	0	1	0	0	0	0	0	0	0	0	1	0	1	0	1	0	0	0	0	0	0	0	0	0	0	0	0	0	0	0	0	0	0	0	0	0	0	0	0	0	0	0	0	0	1	0	0	0	0
KLHL4	0	1	0	0	0	0	0	0	0	0	0	0	0	0	0	1	0	0	0	0	0	0	0	0	0	0	0	0	0	0	0	0	0	0	0	0	0	0	0	0	0	0	0	0	1	0	0	0	0
PABPC5	0	1	0	0	0	0	0	0	0	1	0	0	0	0	0	0	0	0	0	0	0	0	0	0	0	0	0	0	0	0	0	0	0	0	0	0	1	0	0	0	0	0	0	0	1	0	0	0	0
PCDH11X	0	1	0	0	0	0	0	0	0	0	1	0	1	0	1	0	0	0	0	0	0	0	0	0	0	0	0	0	0	0	0	0	0	0	0	0	1	0	0	0	0	0	0	0	1	0	0	0	0
NAP1L3	0	1	0	1	0	0	0	0	1	0	0	0	0	1	0	1	0	0	0	0	0	0	0	0	0	0	0	0	0	0	0	0	0	0	0	0	0	1	0	0	0	0	0	0	1	0	0	0	0
DIAPH2	0	1	0	0	1	0	0	0	0	0	1	0	0	0	0	0	0	0	1	0	0	0	0	0	0	0	0	0	0	0	0	0	0	0	0	0	1	0	0	0	0	0	0	0	1	0	0	0	0
PCDH19	0	1	0	0	0	0	0	0	0	0	0	1	0	1	0	0	0	0	0	0	0	0	0	0	0	0	0	0	0	0	0	0	0	0	0	0	0	0	0	0	0	0	0	0	0	0	0	0	0
TNMD	0	1	0	0	0	0	0	0	0	0	0	0	0	0	0	0	0	0	0	0	0	0	0	0	0	0	0	0	0	0	0	0	0	0	0	0	0	0	1	0	0	0	0	0	1	0	0	0	0
TSPAN6	0	1	0	0	0	0	0	0	0	0	0	1	0	0	1	0	0	0	0	0	0	0	0	0	0	0	0	0	0	0	0	0	0	0	0	0	0	1	0	0	0	0	0	0	0	0	0	0	0
SRPX2	0	1	0	0	1	0	0	0	0	0	0	0	1	0	1	0	0	0	0	0	0	0	0	0	0	0	0	0	0	0	0	0	0	0	0	0	1	0	0	0	0	0	0	0	0	1	0	0	0
SYTL4	0	1	0	1	0	0	0	0	0	0	0	0	1	1	0	0	0	0	0	0	0	0	0	0	0	0	0	0	0	0	0	0	0	0	0	0	0	0	1	0	0	0	0	0	0	1	0	0	0
CSTF2	0	1	0	0	0	0	0	0	0	0	0	0	0	0	0	0	0	0	1	0	0	0	0	0	0	0	0	0	0	0	0	0	0	0	0	0	1	0	0	0	0	0	0	0	0	1	0	0	0
NOX1	0	1	0	0	0	0	0	0	0	0	0	1	0	1	0	0	0	0	0	0	0	0	0	0	0	0	0	0	0	0	0	0	0	0	0	0	0	0	0	0	0	0	0	0	1	0	0	0	0
XKRX	0	1	0	0	0	0	0	0	0	0	0	0	1	0	1	0	0	0	0	0	0	0	0	0	0	0	0	0	0	0	0	0	0	0	0	0	0	0	0	0	0	0	0	0	0	0	0	0	0
TRMT2B	0	1	0	0	0	0	0	0	0	0	0	0	0	0	0	1	0	0	1	0	0	0	0	0	0	0	0	0	0	0	0	0	0	0	0	0	1	0	0	0	0	0	0	0	1	0	0	0	0
CENPI	0	1	0	0	0	0	0	0	0	0	0	0	0	0	0	1	0	0	1	0	0	0	0	0	0	0	0	0	0	0	0	0	0	0	0	0	0	1	0	0	0	0	0	0	1	0	0	0	0
DRP2	0	1	0	0	0	0	0	0	0	0	0	0	0	0	0	0	0	0	0	0	0	0	0	0	0	0	0	0	0	0	0	0	0	0	0	0	0	1	0	0	0	0	0	0	1	0	0	0	0
TAF7L	0	1	0	0	0	0	0	1	0	0	0	1	0	1	0	0	0	0	0	0	0	0	0	0	0	0	0	0	0	0	0	0	0	0	0	0	0	0	0	0	0	0	0	0	0	0	0	0	0
BTK	0	1	0	0	0	0	1	0	0	0	0	0	0	0	0	1	0	0	1	0	0	0	0	0	0	0	0	0	0	0	0	0	0	0	0	0	0	0	0	0	0	0	0	0	0	0	0	0	0
GLA	0	1	0	0	0	0	0	0	0	0	0	0	0	0	0	1	0	0	1	0	0	0	0	0	0	0	0	0	0	0	0	0	0	0	0	0	0	0	0	0	0	0	0	0	0	0	0	0	0
ARMCX4	0	1	0	0	1	0	0	0	0	0	0	0	0	0	0	1	0	0	1	0	0	0	0	0	0	0	0	0	0	0	0	0	0	0	0	0	0	1	0	0	0	0	0	0	0	1	0	0	0
ARMCX3	0	1	0	0	0	0	0	0	0	0	0	0	0	0	0	0	0	0	0	0	0	0	0	0	0	0	0	0	0	0	0	0	0	0	0	0	0	1	0	0	0	0	0	0	1	0	0	0	0
ARMCX2	0	1	0	0	0	0	0	0	0	0	0	0	0	0	0	0	0	0	1	0	0	0	0	0	0	0	0	0	0	0	0	0	0	0	0	0	1	0	0	0	0	0	0	0	0	1	0	0	0
NXF5	0	1	0	0	0	0	0	1	0	0	0	1	0	0	0	0	0	0	0	0	0	0	0	0	0	0	0	0	0	0	0	0	0	0	0	0	0	0	0	0	0	0	0	0	0	0	0	0	0
ZMAT1	0	1	0	0	0	0	0	0	0	0	0	0	1	0	1	0	0	0	0	0	0	0	0	0	0	0	0	0	0	0	0	0	0	0	0	0	0	1	0	0	0	0	0	0	1	0	0	0	0
BEX5	0	1	0	0	0	0	0	0	0	0	0	0	0	0	0	0	0	0	0	0	0	0	0	0	0	0	0	0	0	0	0	0	0	0	0	0	0	1	0	0	0	0	0	0	1	0	0	0	0
NXF3	0	1	0	0	1	0	0	0	0	0	0	0	0	0	1	1	0	0	0	0	0	0	0	0	0	0	0	0	0	0	0	0	0	0	0	0	0	0	0	0	0	0	1	0	0	1	0	0	0
BEX4	0	1	0	0	0	0	0	0	0	0	0	0	0	0	0	1	0	0	1	0	0	0	0	0	0	0	0	0	0	0	0	0	0	0	0	0	1	0	0	0	0	0	0	0	0	1	0	0	0
TCEAL8	0	1	0	0	0	0	0	0	0	0	0	0	0	0	0	0	0	0	0	0	0	0	0	0	0	0	0	0	0	0	0	0	0	0	0	0	1	0	0	0	0	0	0	0	0	1	0	0	0
BEX2	0	1	0	0	0	0	0	0	0	0	0	0	0	0	0	1	0	0	0	0	0	0	0	0	0	0	0	0	0	0	0	0	0	0	0	0	0	1	0	0	0	0	0	0	0	0	0	0	0
TCEAL7	0	1	0	0	0	0	0	0	0	0	0	0	0	0	0	0	0	0	0	0	0	0	0	0	0	0	0	0	0	0	0	0	0	0	0	0	0	0	1	0	0	0	0	0	1	0	0	0	0
RAB40A	0	1	0	0	0	0	0	0	0	0	1	0	0	0	0	0	0	0	0	0	0	0	0	0	0	0	0	0	0	0	0	0	0	0	0	0	1	0	0	0	0	0	0	0	0	1	0	0	0
TCEAL4	0	1	0	0	0	0	1	0	0	0	0	0	0	0	0	1	0	0	0	0	0	0	0	0	0	0	0	0	0	0	0	0	0	0	0	0	1	0	0	0	0	0	0	0	0	1	0	0	0
TCEAL3	0	1	0	0	0	0	0	0	0	0	0	0	0	0	0	0	0	0	1	0	0	0	0	0	0	0	0	0	0	0	0	0	0	0	0	0	1	0	0	0	0	0	0	0	0	1	0	0	0
MORF4L2	0	1	0	0	1	0	1	0	0	0	0	0	0	0	0	0	0	0	0	0	0	0	0	0	0	0	0	0	0	0	0	0	0	0	0	0	0	0	0	0	0	0	0	0	0	1	0	0	0
GLRA4	0	1	0	0	0	0	0	0	0	0	0	0	1	0	1	0	0	0	0	0	0	0	0	0	0	0	0	0	0	0	0	0	0	0	0	0	0	0	0	0	0	0	0	0	0	0	0	0	0
TMEM31	0	1	0	0	0	0	0	0	0	0	0	0	0	0	0	0	0	0	0	0	0	0	0	0	0	0	0	0	0	0	0	0	0	0	0	0	0	0	0	0	1	0	0	0	1	0	0	0	0
PLP1	0	1	0	0	0	0	0	0	0	0	0	0	1	0	0	0	0	0	0	0	0	0	0	0	0	0	0	0	0	0	0	0	0	0	0	0	1	0	0	0	0	0	0	0	0	0	0	0	0
RAB9B	0	1	0	0	0	0	0	0	0	0	0	0	0	0	0	0	0	0	0	0	0	0	0	0	0	0	0	0	0	0	0	0	0	0	0	0	1	0	0	0	0	0	0	0	1	0	0	0	0
FAM199X	0	1	0	0	0	0	0	0	0	0	0	0	0	0	0	1	0	0	0	0	0	0	0	0	0	0	0	0	0	0	0	0	0	0	0	0	0	0	0	0	0	0	0	0	0	1	0	0	0
IL1RAPL2	0	1	0	0	0	0	0	0	0	0	1	0	1	0	1	0	0	0	0	0	0	0	0	0	0	0	0	0	0	0	0	0	0	0	0	0	0	0	0	0	0	0	0	0	1	0	0	0	0
NRK	0	1	0	0	0	0	0	0	0	0	0	0	0	0	0	0	0	0	0	0	0	0	0	0	0	0	0	0	0	0	0	0	0	0	0	0	0	0	1	0	0	0	0	0	1	0	0	0	0
MORC4	0	1	0	0	0	0	0	0	0	0	0	0	1	0	0	0	0	0	0	0	0	0	0	0	0	0	0	0	0	0	0	0	0	0	0	0	0	1	0	0	0	0	1	0	1	0	0	1	0
CLDN2	0	1	0	0	0	0	0	0	0	0	0	0	0	0	0	1	0	0	0	0	0	0	0	0	0	0	0	0	0	0	0	0	0	0	0	0	0	1	0	0	0	0	0	0	0	0	0	0	0
RBM41	0	1	0	0	0	0	0	0	0	0	0	0	0	0	0	1	0	0	1	0	0	0	0	0	0	0	0	0	0	0	0	0	0	0	0	0	1	0	0	0	0	0	0	0	0	1	0	0	0
NUP62CL	0	1	0	0	0	0	0	0	0	0	0	0	1	0	1	1	0	0	0	0	0	0	0	0	0	0	0	0	0	0	0	0	0	0	0	0	0	0	0	0	0	0	0	0	1	0	0	1	0
FRMPD3	0	1	0	0	1	0	0	0	0	0	0	0	0	0	1	1	0	0	0	0	0	0	0	0	0	0	0	0	0	0	0	0	0	0	0	0	0	0	0	0	0	0	0	0	1	0	0	0	0
TSC22D3	0	1	0	0	0	0	0	0	0	0	0	0	1	0	0	0	0	0	0	0	0	0	0	0	0	0	0	0	0	0	0	0	0	0	0	0	0	0	0	0	0	0	0	0	1	0	0	0	0
MID2	0	1	0	0	0	0	0	0	0	0	0	0	1	0	1	0	0	0	0	0	0	0	0	0	0	0	0	0	0	0	0	0	0	0	0	0	1	0	0	0	0	0	0	0	0	1	0	0	0
PSMD10	0	1	0	0	0	0	0	0	0	0	0	0	0	0	0	0	0	0	1	0	0	0	0	0	0	0	0	0	0	0	0	0	0	0	0	0	0	1	0	0	0	0	0	0	1	0	0	0	0
ATG4A	0	1	0	0	0	0	0	0	0	0	0	0	0	0	0	0	0	0	1	0	0	0	0	0	0	0	0	0	0	0	0	0	0	0	0	0	1	0	0	0	0	0	0	0	0	1	0	0	0
COL4A6	0	1	0	0	1	0	0	0	0	1	0	0	1	0	1	1	0	0	0	0	0	0	0	0	0	0	0	0	0	0	0	0	0	0	0	0	1	0	0	0	0	0	0	0	0	1	0	0	0
COL4A5	0	1	0	0	0	0	0	0	0	0	0	0	0	0	0	0	0	0	0	0	0	0	0	0	0	0	0	0	0	0	0	0	0	0	0	0	1	0	0	0	0	0	0	0	1	0	0	0	0
GUCY2F	0	1	0	0	0	0	0	0	0	0	0	0	1	0	0	0	0	0	0	0	0	0	0	0	0	0	0	0	0	0	0	0	0	0	0	0	0	0	0	0	0	0	0	0	1	0	0	0	0
NXT2	0	1	0	0	0	0	0	0	0	0	0	0	0	0	0	0	0	0	1	0	0	0	0	0	0	0	0	0	0	0	0	0	0	0	0	0	0	0	0	0	0	0	0	0	1	0	0	0	0
ACSL4	0	1	0	0	0	0	0	0	0	0	0	0	0	0	0	0	0	0	0	0	0	0	0	0	0	0	0	0	0	0	0	0	0	0	0	0	0	1	0	0	0	0	1	0	1	0	0	0	0
TMEM164	0	1	0	0	0	0	0	0	0	0	0	0	0	0	0	1	0	0	0	0	0	0	0	0	0	0	0	0	0	0	0	0	0	0	0	0	0	1	0	0	0	0	1	0	1	0	0	0	0
AMMECR1	0	1	0	0	0	0	0	0	0	0	0	0	0	0	0	0	0	0	0	0	0	0	0	0	0	0	0	0	0	0	0	0	0	0	0	0	0	0	0	0	0	0	0	0	0	1	0	1	0
CHRDL1	0	1	0	0	0	0	0	0	0	0	0	0	0	0	0	1	0	0	0	0	0	0	0	0	0	0	0	0	0	0	0	0	0	0	0	0	0	0	1	0	0	0	0	0	0	0	0	0	0
PAK3	0	1	0	0	0	0	0	0	0	0	0	0	1	0	0	0	0	0	0	0	0	0	0	0	0	0	0	0	0	0	0	0	0	0	0	0	0	1	0	0	0	0	0	0	0	0	0	0	0
CAPN6	0	1	0	0	0	0	0	0	0	0	0	0	0	0	0	0	0	0	0	0	0	0	0	0	0	0	0	0	0	0	0	0	0	0	0	0	0	0	1	0	0	0	0	0	1	0	0	0	0
ALG13	0	1	0	0	1	0	1	0	0	0	0	0	1	0	1	0	0	0	0	0	0	0	0	0	0	0	0	0	0	0	0	0	0	0	0	0	0	1	0	1	0	0	0	0	1	0	0	0	0
TRPC5	0	1	0	0	1	0	0	0	0	0	0	0	1	0	1	0	0	0	0	0	0	0	0	0	0	0	0	0	0	0	0	0	0	0	0	0	1	0	0	0	0	0	1	0	0	0	0	0	0
LHFPL1	0	1	0	0	0	0	0	0	0	0	1	0	1	0	0	0	0	0	0	0	0	0	0	0	0	0	0	0	0	0	0	0	0	0	0	0	0	0	0	0	0	0	0	0	0	1	0	0	0
AMOT	0	1	0	0	0	0	0	0	0	0	0	0	0	0	0	1	0	0	0	0	0	0	0	0	0	0	0	0	0	0	0	0	0	0	0	0	0	0	0	0	0	0	0	0	1	0	0	0	0
HTR2C	0	1	0	0	0	0	0	0	1	0	0	1	0	1	0	0	0	0	0	0	0	0	0	0	0	0	0	0	0	0	0	0	0	0	0	0	0	0	0	0	0	0	0	0	0	0	0	0	0
LRCH2	0	1	0	0	0	0	0	0	0	0	1	0	1	0	0	1	0	0	0	0	0	0	0	0	0	0	0	0	0	0	0	0	0	0	0	0	1	0	0	0	0	0	0	0	0	0	0	0	0
PLS3	0	1	0	0	1	0	0	0	0	1	0	0	1	0	1	0	0	0	1	0	0	0	0	0	0	0	0	0	0	0	0	0	0	0	0	0	0	0	0	0	0	0	0	0	0	1	0	0	0
KLHL13	0	1	0	0	0	0	0	0	0	0	0	0	1	0	0	0	0	0	0	0	0	0	0	0	0	0	0	0	0	0	0	0	0	0	0	0	0	0	1	0	0	0	0	0	1	0	0	0	0
DOCK11	0	1	0	0	0	0	1	0	0	0	0	0	0	0	0	0	0	0	1	0	0	0	0	0	0	0	0	0	0	0	0	0	0	0	0	0	0	1	0	0	0	0	0	0	0	1	0	0	0
IL13RA1	0	1	0	0	0	0	0	0	0	0	0	0	1	0	0	0	0	0	0	0	0	0	0	0	0	0	0	0	0	0	0	0	0	0	0	0	0	0	0	1	0	0	0	0	1	0	0	0	0
KIAA1210	0	1	0	0	0	0	0	0	0	0	0	0	1	0	1	0	0	0	0	0	0	0	0	0	0	0	0	0	0	0	0	0	0	0	0	0	0	0	0	0	0	0	0	0	0	0	0	0	0
PGRMC1	0	1	0	0	0	0	0	0	0	0	0	0	0	0	0	0	0	0	1	0	0	0	0	0	0	0	0	0	0	0	0	0	0	0	0	0	0	1	0	0	0	0	0	0	1	0	0	0	0
SLC25A43	0	1	0	0	1	0	0	0	0	0	0	0	0	0	0	1	0	0	1	0	0	0	0	0	0	0	0	0	0	0	0	0	0	0	0	0	0	0	0	0	0	0	0	0	0	0	0	0	0
SLC25A5	0	1	0	0	0	0	0	0	0	0	0	0	1	0	0	0	0	0	1	0	0	0	0	0	0	0	0	0	0	0	0	0	0	0	0	0	0	0	1	0	0	0	0	0	1	0	0	0	0
CXorf56	0	1	0	0	0	0	0	0	0	0	0	0	0	0	0	1	0	0	0	0	0	0	0	0	0	0	0	0	0	0	0	0	0	0	0	0	0	0	0	0	0	0	0	0	1	0	0	0	0
UBE2A	0	1	0	0	0	0	0	0	0	0	0	0	0	0	0	0	0	0	0	0	0	0	0	0	0	0	0	0	0	0	0	0	0	0	0	0	0	1	0	0	0	0	1	0	1	0	0	0	0
NKRF	0	1	0	0	0	0	0	0	0	0	0	0	0	0	0	0	0	0	0	0	0	0	0	0	0	0	0	0	0	0	0	0	0	0	0	0	0	0	0	1	0	0	0	0	1	0	0	1	0
RPL39	0	1	0	0	0	0	0	0	0	0	0	0	0	0	0	0	0	0	1	0	0	0	0	0	0	0	0	0	0	0	0	0	0	0	0	0	0	0	0	0	0	0	0	0	0	1	0	0	0
AKAP14	0	1	0	0	0	0	0	0	0	0	0	0	1	0	1	0	0	0	0	0	0	0	0	0	0	0	0	0	0	0	0	0	0	0	0	0	0	0	0	0	0	0	0	0	0	0	0	0	0
RHOXF1	0	1	0	0	0	0	0	0	0	0	0	0	0	0	0	0	0	0	0	0	0	0	0	0	0	0	0	0	0	0	0	0	0	0	0	0	0	1	0	0	0	0	0	0	1	0	0	0	0
ZBTB33	0	1	0	0	0	0	0	0	0	0	0	0	0	0	0	0	1	0	1	0	0	0	0	0	0	0	0	0	0	0	0	0	0	0	0	0	0	0	0	0	0	0	0	0	1	0	0	0	0
TMEM255A	0	1	0	0	0	0	0	0	0	0	0	0	0	0	0	0	0	0	0	0	0	0	0	0	0	0	0	0	0	0	0	0	0	0	0	0	0	0	1	0	0	0	0	0	0	1	0	0	0
LAMP2	0	1	0	0	0	0	0	0	0	0	0	0	0	0	0	1	0	0	1	0	0	0	0	0	0	0	0	0	0	0	0	0	0	0	0	0	1	0	0	1	0	0	0	0	0	0	0	0	0
CUL4B	0	1	0	0	1	0	0	0	0	0	0	0	0	0	0	0	0	0	0	0	0	0	0	0	0	0	0	0	0	0	0	0	0	0	0	0	1	0	0	0	0	0	0	0	0	1	0	0	0
C1GALT1C1	0	1	0	0	0	0	0	0	0	0	0	0	0	0	0	0	0	0	1	0	0	0	0	0	0	0	0	0	0	0	0	0	0	0	0	0	1	0	0	0	0	0	0	0	0	1	0	0	0
GLUD2	0	1	0	0	0	0	0	0	0	0	0	0	0	0	0	0	0	0	0	0	0	0	0	0	0	0	0	0	0	0	0	0	0	0	0	0	0	1	0	0	0	0	0	0	0	1	0	0	0
[truncated: 113 more rows]
[truncated: 3 more columns]

## Sheet: Supplementary Table 3
Disease	Disease_id	Gene	Gene_id	UniProt	Gene_Full_Name	Protein_Class	N_diseases_g	DSI_g	DPI_g	pLI	Score_gda	EL_gda	EI_gda	N_PMIDs	N_SNPs_gda	First_Ref	Last_Ref
[truncated: 1,883 more rows]
